# Supplementary material for: High-Entropy Solvation Chemistry towards Affordable and Practical Ah-level Zinc Metal Battery
Source: Research Square preprint supplement (doi:10.21203/rs.3.rs-4870452/v1), 2025-06-23
Supplement: Supplementary file 1 [file 31ab56bd8cd94a947914dfbd.docx]

**Inventory of Supporting Information**

**Fig. S1** Properties of halogen ions, *Hofmeister* series

**Fig. S2** Coulombic efficiency of Zn||Cu asymmetric cell with different electrolytes by *Aurbach’s* method under the conditions (a) (1 mA cm-2, 5 mAh cm-2)+( 1 mA cm-2, 1 mAh cm-2)*10, (b) (5 mA cm-2, 10 mAh cm-2)+(5 mA cm-2, 5 mAh cm-2)*20

**Fig. S3** Coulombic efficiency of Zn||Cu asymmetric cells in electrolytes with single anion addition (a) 2M+0.06M Cl-, (b) 2M+0.06M Br-, and (c) 2M+0.06M I- electrolytes

**Fig. S4** Long-cycle performance of Zn||Zn symmetric cells with different electrolytes at 10 mA cm-2 and 5 mAh cm-2

**Fig. S5** Average Coulombic efficiency of Zn||Cu asymmetric cells using different electrolytes at (a) 1 mA cm-2, 1 mAh cm-2, (b) 5 mA cm-2, 5 mAh cm-2, (c) 10 mA cm-2, 10 mAh cm-2, and (d) 10 mA cm-2 and 5 mAh cm-2

**Fig. S6** Ex-situ XRD of stainless steel collector in cells using (a) baseline electrolyte and (b) HESE.(c) XRD pattern of zinc metal after 5 days of immersion in two electrolytes (inset is the optical photograph)

**Fig.S7** The calculated configurational entropy (Sconf) (a) before and (b) after mixed

**Fig. S8** Raman spectra fitting results of *v*-O-H portion (strong, medium, and weak H-bonds) in (a) 2M ZSO, (b) 1HESE, (c) HESE, (d) 3HESE, and (e) 5HESE

**Fig. S9** The lifetime and the numbers of H-bonds of HESE and 2M ZSO

**Fig.S10** Raman spectra fitting results of *v*-O-H portion (strong, medium, and weak H-bonds) in (a) 2M+0.06M Cl−, (b) 2M+0.06M Br−,and (c) 2M+0.06M I− electrolyte, (d) Statistical results

**Fig. S****11** 3D snapshot and local amplification of MD simulationsof 2M ZSO electrolyte system

**Fig. S12** The coordination between Zn and each other atoms in HESE system

**Fig. S13** (a) 3D snapshot and local amplification, (b) The coordination between Zn and I of 2M+0.06M I− electrolyte system

**Fig. S14** Average Zn2+ cluster sizes in different electrolytes

**Fig. S15** The pair distribution function (PDF) spectra of two electrolyte solutions

**Fig. S16** EIS curves of Zn||Zn symmetric cells at different temperatures in (a) 2M ZSO and (b) HESE, and (c) the calculated activation energy (Ea)

**Fig. S17** (a-b) EIS curves of two electrolytes at 25℃, Ionic conductivity at (c) 25℃ and (d) different temperatures

**Fig. S18** Chronoamperograms (CA) and EIS curves in (a) 2M ZSO and (b) HESE, (c) the calculated transference number of Zn2+

**Fig. S19** A summary of image snapshot with frontal view of the electrode-electrolyte interface in HESE system at (a) negative charge, (b) zero charge, and (c) positive charge in HESE, respectively.

**Fig. S20** Density profiles for the Zn2+, Cl-, Br-, and I- as a function of distance from Zn anode with (a) zero charge, (b) negative charge, and (c) positive charge in HESE, respectively.

**Fig. S21** CV curves of Zn||Zn symmertic cells in (a) 2M ZSO, (b) HESE, and the linear fits to calculate (c) Electrical double-layer capacitor (EDLC), (d) Differential capacitance curves of Zn||Ti half-cells in different electrolytes

**Fig. S22** EIS and Distribution of relaxation times (DRT) fitting curves of Zn||Zn symmetric cell with (a-b) 2M ZSO, (b) HESE. (1): the relaxation of electrons, (2): the adsorption and desolvation process of Zn(H2O)62− at the interface, (3): the migration and crystallization of Zn ions on the electrode, (4): the charge transfer process across the interface, (5): ion diffusion.

**Fig. S23** CV curves of Zn||Cu asymmetric cells in (a) 2M ZSO, (b) HESE, (c) 2M+0.06M Cl-, (d) 2M+0.06M Br-, and (e) 2M+0.06M I- electrolyte

**Fig. S24** Chronoamperograms (CA) curves in different electrolytes under a overpotential of −150 mV

**Fig. S25** Digital photographs of the initial nucleation and growth processes of zinc in two electrolytes

**Fig. S26** Distribution and SEM micrographs of zinc deposition (5 mAh cm-2) on copper (Cu) substrate in two electrolytes

**Fig. S27** SEM images of deposited zinc morphology obtained under different deposition condition

**Fig. S28** Initial Raman full-spectra of (a) 2M ZSO and (b) HESE

**Fig. S29** *In-situ* Raman spectra of the Zn/electrolyte interface in 2M ZSO electrolyte during (a) plating and (b) stripping

**Fig. S30** *In-situ* Raman spectra of *v*-O-H at the Zn/electrolyte interface in (a) 2M ZSO and (b) HESE during stripping and plating

**Fig. S31** Raman spectra fitting of the *v*-O-H portion, the proportion statistics of strong and weak H-bonds (S-H and W-H) in 2M ZSO electrolyte during (a) stripping and (b) plating

**Fig. S32** Raman spectra fitting of the *v*-O-H portion, the proportion statistics of strong and weak H-bonds (S-H and W-H) in HESE during (a) stripping and (b) plating

**Fig. S33** LSV curves of two electrolytes, inset is the overpotential

**Fig. S34** (a) Digital photos of battery expansion using 2M ZSO electrolyte and thickness changes of a single battery over time, (b) The thickness of Zn||Zn symmetric cells assembled with two electrolytes varies with the working time, (c) The regional corresponding distribution of cell thickness and cycle time

**Fig. S35** In situ pH test and device diagram during charge and discharge process

**Fig. S36** Zn deposition voltage profiles of Zn||Cu cells at 10 mA cm-2. A-E and F-J are time nodes of different deposition capacities, which are used to observe the deposition morphology

**Fig. S37** Cross-section SEM images of deposited zinc morphology

**Fig. S38** Ex-situ XRD patterns of deposited zinc with increased area capacity in (a) 2M ZSO and (b) 2HESE, (c) Proportion change of I(002)/I(100)

**Fig. S39** The rate performance of Zn||Zn symmetric cells with areal capacity of (a) 1 mAh cm-2 and (b) 10 mAh cm-2

**Fig. S40** The long-cycle performance of Zn||Zn symmetric cells at (a) 1 mA cm -2 and 1 mAh cm-2, (b) 10 mA cm -2 and 10 mAh cm-2 (DOD=34.2%)

**Fig. S41** Long cycle performance and time-voltage curves of Zn||Zn symmetric cell using HESE under 10 mA cm-2, 1 mAh cm-2

**Fig. S42** Comparison of cyclic reversibility in the recent reports.

**Fig. S43** The Coulombic efficiency of Zn||Cu asymmetric cells under 40 mA cm-2, 10 mAh cm-2

**Fig. S44** Comparison of CEs and CPC of Zn||Cu cells in the recent reports.

**Fig. S45** Comparison of CD and CPC of Zn||Ti cells in the recent reports.

**Fig. S46** XRD pattern of NaV3O8 (NVO) powder

**Fig. S47** Digital photos and SEM images of high-loading (~19 mg cm-2) cathode electrodes and mapping of key elements

**Fig. S48** Long cycle performance of Zn||NVO full cells with different electrolytes

**Fig. S49** Cross-section SEM images of high-loading (~37.0 mg cm-2) cathode electrodes and mapping of key elements

**Fig. S50** (a) CV curves at various scan rates, (b) The relations between peak current and scan rates of Zn||NVO full cell using HESE electrolyte

**Fig.S51** EIS curves of Zn||NVO full cell after different cycles using (a) 2M ZSO and (b) HESE

**Fig. S52** Comparison of self-discharge performances in Zn||NVO full cell with (a) 2M ZSO and (b) HESE evaluated by resting for 48, 72, 96 h at 100% state of charge (SOC), respectively

**Fig. S53** Digital photo of Ah-level multi-layer pouch cell material

**Table S1** CEs test results of different electrolytes

**Table. S2** The types of solvation structures and their corresponding proportion in 2M ZSO electrolyte system

**Table. S3** The types of solvation structures and their corresponding proportion in HESE system

**Table. S3-2** Classified statistics

**Table S4** Electrostatic potential and forming energy of main Zn solvation structure

**Table S5.** Performance comparison of symmetric Zn||Zn cells from the previously reported works involving electrolyte additives and our work

**Table S6.** Performance comparison of Zn||Cu cells from the previously reported works involving electrolyte additives and our work

**Table S7.** Performance comparison of Zn||Ti cells from the previously reported works involving electrolyte additives and our work

**Table S8.** Performance comparison of full cells from the previously reported works involving electrolyte additives and our work

**Table S9.** Battery design parameters for zinc ion full cell based onZn||NVO in HESE

**Table S10.** COSTING. Summary of prices of various reagents of one coin cell. Price data of all this were collected from Internet (https://www.alibaba.com/)

**Supplementary References**
