# Supplementary material for: High-Entropy Solvation Chemistry towards Affordable and Practical Ah-level Zinc Metal Battery
Source: Research Square preprint supplement (doi:10.21203/rs.3.rs-4870452/v1), 2025-06-23
Supplement: Supplementary file 2 [file eb8bd35e4657885117d69b08.xlsx]

## Sheet: Fig.1(b)
ZSO+Cl			ZSO+Br			ZSO+I			HESE
Coulombic efficiency (%)	Overpotential (mV)		Coulombic efficiency (%)	Overpotential (mV)		Coulombic efficiency (%)	Overpotential (mV)		Coulombic efficiency (%)	Overpotential (mV)
99.84	70		99.82	63		99.6	57		99.94	29
99.8	125		99.71	106		99.41	93		99.76	62
99.17	90.4		99.01	74.2		98.83	69		99.69	57.4

## Sheet: Fig.1(d)
	ZSO			ZSO+Cl			ZSO+Br			ZSO+I			HESE
time(h)	voltage(V)		time(h)	voltage(V)		time(h)	voltage(V)		time(h)	voltage(V)		time(h)	voltage(V)
0	0.9914		0	0.9029		0	0.8333		0	0.828		0	0.651
0.01	0.9928		0.01	0.9032		0.01	0.8335		0.01	0.8289		0.01	0.6507
0.02	0.994		0.02	0.9036		0.02	0.8337		0.02	0.8297		0.02	0.6504
0.03	0.9949		0.03	0.9039		0.03	0.834		0.03	0.8304		0.03	0.6505
0.03	0.9957		0.03	0.9043		0.03	0.8341		0.03	0.8311		0.03	0.6503
0.04	0.9966		0.04	0.9046		0.04	0.8344		0.04	0.8317		0.04	0.6504
0.05	0.9974		0.05	0.905		0.05	0.8346		0.05	0.8322		0.05	0.6502
0.06	0.998		0.06	0.9053		0.06	0.8348		0.06	0.8328		0.06	0.6503
0.07	0.9986		0.07	0.9056		0.07	0.835		0.07	0.8333		0.07	0.6502
0.07	0.9992		0.07	0.9059		0.07	0.8352		0.07	0.8337		0.07	0.6501
0.08	0.9997		0.08	0.9061		0.08	0.8353		0.08	0.834		0.08	0.6501
0.08	0.9999		0.09	-0.0685		0.08	0.1897		0.08	0.2811		0.08	0.6498
0.09	-0.1118		0.1	-0.0634		0.09	-0.0777		0.09	-0.0692		0.09	-0.0406
0.1	-0.104		0.11	-0.0598		0.1	-0.0709		0.1	-0.0643		0.1	-0.0372
0.11	-0.0994		0.12	-0.0573		0.11	-0.0676		0.11	-0.0615		0.11	-0.0356
0.12	-0.096		0.12	-0.0553		0.12	-0.0655		0.12	-0.0596		0.12	-0.0346
0.12	-0.0936		0.13	-0.0539		0.12	-0.0635		0.12	-0.0582		0.12	-0.0339
0.13	-0.0918		0.14	-0.0526		0.13	-0.0621		0.13	-0.0572		0.13	-0.0333
0.14	-0.0902		0.15	-0.0516		0.14	-0.0609		0.14	-0.0563		0.14	-0.0329
0.15	-0.0889		0.16	-0.0508		0.15	-0.0599		0.15	-0.0555		0.15	-0.0325
0.16	-0.0878		0.17	-0.05		0.16	-0.0589		0.16	-0.055		0.16	-0.0322
0.17	-0.0867		0.17	-0.0494		0.17	-0.0579		0.17	-0.0545		0.17	-0.032
0.17	-0.0861		0.17	-0.0488		0.17	-0.0575		0.17	-0.054		0.17	-0.0319
0.18	-0.0852		0.18	-0.0482		0.18	-0.0572		0.18	-0.0537		0.18	-0.0318
0.19	-0.0843		0.19	-0.0477		0.19	-0.0565		0.19	-0.0533		0.19	-0.0316
0.2	-0.0837		0.2	-0.0473		0.2	-0.0553		0.2	-0.053		0.2	-0.0315
0.21	-0.0829		0.21	-0.0469		0.21	-0.0547		0.21	-0.0527		0.21	-0.0314
0.22	-0.0822		0.22	-0.0464		0.22	-0.0543		0.22	-0.0525		0.22	-0.0313
0.23	-0.0817		0.23	-0.0461		0.23	-0.0538		0.23	-0.0523		0.23	-0.0313
0.23	-0.081		0.23	-0.0457		0.23	-0.0534		0.23	-0.052		0.23	-0.0311
0.24	-0.0801		0.24	-0.0453		0.24	-0.0529		0.24	-0.0518		0.24	-0.0311
0.25	-0.0796		0.25	-0.045		0.25	-0.0525		0.25	-0.0517		0.25	-0.0311
0.26	-0.0791		0.26	-0.0447		0.26	-0.0522		0.26	-0.0515		0.26	-0.0309
0.27	-0.0784		0.27	-0.0444		0.27	-0.0518		0.27	-0.0514		0.27	-0.0309
0.28	-0.0779		0.28	-0.0441		0.28	-0.0515		0.28	-0.0512		0.28	-0.0309
0.28	-0.0775		0.28	-0.0438		0.28	-0.0511		0.28	-0.051		0.28	-0.0309
0.29	-0.0774		0.29	-0.0435		0.29	-0.0508		0.29	-0.0509		0.29	-0.0308
0.3	-0.0769		0.3	-0.0432		0.3	-0.0504		0.3	-0.0507		0.3	-0.0308
0.31	-0.0767		0.31	-0.0429		0.31	-0.0495		0.31	-0.0505		0.31	-0.0307
0.32	-0.0766		0.32	-0.0426		0.32	-0.0492		0.32	-0.0504		0.32	-0.0306
0.33	-0.0766		0.33	-0.0424		0.33	-0.0488		0.33	-0.0502		0.33	-0.0306
0.33	-0.0765		0.33	-0.0421		0.33	-0.0486		0.33	-0.05		0.33	-0.0305
0.34	-0.0764		0.34	-0.0418		0.34	-0.0483		0.34	-0.05		0.34	-0.0305
0.35	-0.0763		0.35	-0.0416		0.35	-0.0481		0.35	-0.0498		0.35	-0.0304
0.36	-0.0762		0.36	-0.0414		0.36	-0.0478		0.36	-0.0497		0.36	-0.0304
0.37	-0.0759		0.37	-0.0411		0.37	-0.0476		0.37	-0.0495		0.37	-0.0304
0.38	-0.0756		0.38	-0.0409		0.38	-0.0475		0.38	-0.0493		0.38	-0.0304
0.38	-0.0754		0.38	-0.0407		0.38	-0.0472		0.38	-0.0491		0.38	-0.0303
0.39	-0.0751		0.39	-0.0405		0.39	-0.047		0.39	-0.049		0.39	-0.0303
0.4	-0.0747		0.4	-0.0403		0.4	-0.0469		0.4	-0.0489		0.4	-0.0302
0.41	-0.0744		0.41	-0.0401		0.41	-0.0466		0.41	-0.0487		0.41	-0.0302
0.42	-0.0742		0.42	-0.0399		0.42	-0.0464		0.42	-0.0486		0.42	-0.0302
0.42	-0.0739		0.42	-0.0397		0.42	-0.0462		0.42	-0.0484		0.42	-0.0301
0.43	-0.0738		0.43	-0.0395		0.43	-0.046		0.43	-0.0484		0.43	-0.0301
0.44	-0.0736		0.44	-0.0393		0.44	-0.0458		0.44	-0.0481		0.44	-0.0301
0.45	-0.0735		0.45	-0.0392		0.45	-0.0457		0.45	-0.048		0.45	-0.0301
0.46	-0.0733		0.46	-0.0391		0.46	-0.0455		0.46	-0.0478		0.46	-0.0301
0.47	-0.0731		0.47	-0.0389		0.47	-0.0454		0.47	-0.0476		0.47	-0.0301
0.47	-0.0729		0.47	-0.0387		0.47	-0.0453		0.47	-0.0475		0.47	-0.0301
0.48	-0.0727		0.48	-0.0386		0.48	-0.0449		0.48	-0.0474		0.48	-0.0301
0.49	-0.0724		0.49	-0.0384		0.49	-0.0448		0.49	-0.0473		0.49	-0.0301
0.5	-0.0723		0.5	-0.0383		0.5	-0.0446		0.5	-0.0472		0.5	-0.03
0.51	-0.0722		0.51	-0.0381		0.51	-0.0445		0.51	-0.0471		0.51	-0.03
0.52	-0.0721		0.52	-0.038		0.52	-0.0444		0.52	-0.0471		0.52	-0.03
0.53	-0.0719		0.53	-0.0379		0.53	-0.0442		0.53	-0.047		0.53	-0.0299
0.53	-0.0717		0.53	-0.0378		0.53	-0.0441		0.53	-0.0469		0.53	-0.0299
0.54	-0.0716		0.54	-0.0377		0.54	-0.044		0.54	-0.0468		0.54	-0.0298
0.55	-0.0714		0.55	-0.0376		0.55	-0.0435		0.55	-0.0468		0.55	-0.0298
0.56	-0.0713		0.56	-0.0375		0.56	-0.0434		0.56	-0.0467		0.56	-0.0297
0.57	-0.0713		0.57	-0.0374		0.57	-0.0433		0.57	-0.0464		0.57	-0.0297
0.57	-0.0712		0.57	-0.0373		0.57	-0.0432		0.57	-0.0464		0.57	-0.0297
0.58	-0.0712		0.58	-0.0372		0.58	-0.0432		0.58	-0.0463		0.58	-0.0296
0.59	-0.0711		0.59	-0.0371		0.59	-0.0431		0.59	-0.0463		0.59	-0.0296
0.6	-0.0712		0.6	-0.037		0.6	-0.043		0.6	-0.0462		0.6	-0.0296
0.61	-0.0712		0.61	-0.0369		0.61	-0.043		0.61	-0.0462		0.61	-0.0296
0.62	-0.0713		0.62	-0.0368		0.62	-0.0429		0.62	-0.046		0.62	-0.0296
0.62	-0.0713		0.62	-0.0368		0.62	-0.0428		0.62	-0.046		0.62	-0.0296
0.63	-0.0712		0.63	-0.0367		0.63	-0.0429		0.63	-0.0459		0.63	-0.0295
0.64	-0.0713		0.64	-0.0366		0.64	-0.0429		0.64	-0.0458		0.64	-0.0295
0.65	-0.0714		0.65	-0.0366		0.65	-0.0428		0.65	-0.0458		0.65	-0.0295
0.66	-0.0714		0.66	-0.0365		0.66	-0.0428		0.66	-0.0458		0.66	-0.0295
0.67	-0.0713		0.67	-0.0365		0.67	-0.0427		0.67	-0.0457		0.67	-0.0295
0.68	-0.0713		0.68	-0.0365		0.68	-0.0427		0.68	-0.0457		0.68	-0.0294
0.68	-0.0713		0.68	-0.0364		0.68	-0.0426		0.68	-0.0456		0.68	-0.0295
0.69	-0.0713		0.69	-0.0363		0.69	-0.0426		0.69	-0.0456		0.69	-0.0294
0.7	-0.0712		0.7	-0.0362		0.7	-0.0425		0.7	-0.0455		0.7	-0.0294
0.71	-0.0712		0.71	-0.0362		0.71	-0.0425		0.71	-0.0454		0.71	-0.0294
0.72	-0.0712		0.72	-0.0361		0.72	-0.0425		0.72	-0.0453		0.72	-0.0294
0.72	-0.0711		0.72	-0.036		0.72	-0.0416		0.72	-0.0452		0.72	-0.0294
0.73	-0.0711		0.73	-0.036		0.73	-0.0415		0.73	-0.0452		0.73	-0.0294
0.74	-0.0711		0.74	-0.0359		0.74	-0.0414		0.74	-0.0452		0.74	-0.0294
0.75	-0.0711		0.75	-0.0359		0.75	-0.0414		0.75	-0.0452		0.75	-0.0293
0.76	-0.0712		0.76	-0.0358		0.76	-0.0413		0.76	-0.0452		0.76	-0.0293
0.77	-0.0712		0.77	-0.0358		0.77	-0.0413		0.77	-0.045		0.77	-0.0293
0.78	-0.0713		0.78	-0.0358		0.78	-0.0413		0.78	-0.045		0.78	-0.0293
0.78	-0.0714		0.78	-0.0357		0.78	-0.0413		0.78	-0.045		0.78	-0.0293
0.79	-0.0715		0.79	-0.0357		0.79	-0.0412		0.79	-0.045		0.79	-0.0292
0.8	-0.0717		0.8	-0.0357		0.8	-0.0412		0.8	-0.045		0.8	-0.0292
0.81	-0.0717		0.81	-0.0356		0.81	-0.0411		0.81	-0.045		0.81	-0.0292
0.82	-0.0719		0.82	-0.0356		0.82	-0.0412		0.82	-0.0448		0.82	-0.0292
0.82	-0.072		0.82	-0.0356		0.82	-0.0414		0.82	-0.0447		0.82	-0.0292
0.83	-0.0721		0.83	-0.0356		0.83	-0.0411		0.83	-0.0447		0.83	-0.0292
0.84	-0.0721		0.84	-0.0356		0.84	-0.0411		0.84	-0.0444		0.84	-0.0291
0.85	-0.0721		0.85	-0.0356		0.85	-0.0411		0.85	-0.0443		0.85	-0.0292
0.86	-0.0722		0.86	-0.0356		0.86	-0.0411		0.86	-0.044		0.86	-0.0291
0.87	-0.0723		0.87	-0.0356		0.87	-0.041		0.87	-0.0439		0.87	-0.0291
0.88	-0.0725		0.88	-0.0356		0.88	-0.041		0.88	-0.0438		0.88	-0.0292
0.88	-0.0725		0.88	-0.0355		0.88	-0.041		0.88	-0.0438		0.88	-0.0292
0.89	-0.0726		0.89	-0.0355		0.89	-0.0411		0.89	-0.0438		0.89	-0.0291
0.9	-0.0726		0.9	-0.0356		0.9	-0.0411		0.9	-0.0438		0.9	-0.0291
0.91	-0.0726		0.91	-0.0356		0.91	-0.0411		0.91	-0.0438		0.91	-0.0291
0.92	-0.0728		0.92	-0.0356		0.92	-0.0411		0.92	-0.0437		0.92	-0.0291
0.93	-0.0729		0.93	-0.0356		0.93	-0.0412		0.93	-0.0438		0.93	-0.0291
0.93	-0.073		0.93	-0.0356		0.93	-0.0412		0.93	-0.0438		0.93	-0.0291
0.94	-0.0731		0.94	-0.0356		0.94	-0.0412		0.94	-0.0438		0.94	-0.0291
0.95	-0.0732		0.95	-0.0356		0.95	-0.0411		0.95	-0.0438		0.95	-0.0291
0.96	-0.0733		0.96	-0.0356		0.96	-0.041		0.96	-0.0438		0.96	-0.0291
0.97	-0.0734		0.97	-0.0356		0.97	-0.0411		0.97	-0.0438		0.97	-0.0291
0.97	-0.0735		0.97	-0.0356		0.97	-0.0411		0.97	-0.0438		0.97	-0.0291
0.98	-0.0736		0.98	-0.0356		0.98	-0.0412		0.98	-0.0439		0.98	-0.0291
0.99	-0.0736		0.99	-0.0356		0.99	-0.0412		0.99	-0.0438		0.99	-0.029
1	-0.0737		1	-0.0356		1	-0.0413		1	-0.0439		1	-0.029
1.01	-0.0737		1.01	-0.0356		1.01	-0.0413		1.01	-0.0438		1.01	-0.0289
1.02	-0.0738		1.02	-0.0356		1.02	-0.0415		1.02	-0.0439		1.02	-0.0289
1.02	-0.0738		1.02	-0.0356		1.02	-0.0416		1.02	-0.0439		1.02	-0.0289
1.03	-0.0738		1.03	-0.0356		1.03	-0.0416		1.03	-0.0439		1.03	-0.029
1.04	-0.0739		1.04	-0.0356		1.04	-0.0417		1.04	-0.0439		1.04	-0.029
1.05	-0.074		1.05	-0.0357		1.05	-0.0417		1.05	-0.0439		1.05	-0.029
1.06	-0.074		1.06	-0.0357		1.06	-0.0416		1.06	-0.0438		1.06	-0.0289
1.07	-0.074		1.07	-0.0357		1.07	-0.0416		1.07	-0.0437		1.07	-0.0289
1.07	-0.0739		1.07	-0.0357		1.07	-0.0417		1.07	-0.0437		1.07	-0.0289
1.08	-0.0739		1.08	-0.0357		1.08	-0.0418		1.08	-0.0437		1.08	-0.0289
1.09	-0.074		1.09	-0.0357		1.09	-0.0417		1.09	-0.0436		1.09	-0.0289
1.1	-0.074		1.1	-0.0357		1.1	-0.0418		1.1	-0.0436		1.1	-0.0289
1.11	-0.074		1.11	-0.0358		1.11	-0.0418		1.11	-0.0436		1.11	-0.0289
1.12	-0.074		1.12	-0.0358		1.12	-0.0416		1.12	-0.0437		1.12	-0.0289
1.12	-0.0739		1.12	-0.0358		1.12	-0.0416		1.12	-0.0437		1.12	-0.0289
1.13	-0.0737		1.13	-0.0359		1.13	-0.0417		1.13	-0.0437		1.13	-0.0289
1.14	-0.0736		1.14	-0.0359		1.14	-0.0417		1.14	-0.0436		1.14	-0.0289
1.15	-0.0735		1.15	-0.036		1.15	-0.0418		1.15	-0.0436		1.15	-0.0289
1.16	-0.0735		1.16	-0.036		1.16	-0.0418		1.16	-0.0426		1.16	-0.0289
1.17	-0.0733		1.17	-0.036		1.17	-0.0419		1.17	-0.0426		1.17	-0.0289
1.18	-0.0732		1.18	-0.0361		1.18	-0.0419		1.18	-0.0426		1.18	-0.0289
1.18	-0.0732		1.18	-0.0361		1.18	-0.0418		1.18	-0.0426		1.18	-0.0289
1.19	-0.0732		1.19	-0.0362		1.19	-0.0418		1.19	-0.0425		1.19	-0.0289
1.2	-0.0733		1.2	-0.0362		1.2	-0.0419		1.2	-0.0425		1.2	-0.0289
1.21	-0.073		1.21	-0.0362		1.21	-0.0419		1.21	-0.0425		1.21	-0.0289
1.22	-0.0732		1.22	-0.0362		1.22	-0.0419		1.22	-0.0425		1.22	-0.0289
1.23	-0.0735		1.23	-0.0363		1.23	-0.0419		1.23	-0.0425		1.23	-0.0289
1.23	-0.0729		1.23	-0.0363		1.23	-0.042		1.23	-0.0425		1.23	-0.0289
1.24	-0.0728		1.24	-0.0364		1.24	-0.0419		1.24	-0.0425		1.24	-0.0289
1.25	-0.0726		1.25	-0.0364		1.25	-0.0419		1.25	-0.0425		1.25	-0.0289
1.26	-0.0723		1.26	-0.0364		1.26	-0.0419		1.26	-0.0425		1.26	-0.0289
1.27	-0.0718		1.27	-0.0365		1.27	-0.0419		1.27	-0.0425		1.27	-0.0289
1.27	-0.0709		1.27	-0.0365		1.27	-0.0419		1.27	-0.0425		1.27	-0.0289
1.28	-0.071		1.28	-0.0366		1.28	-0.0419		1.28	-0.0425		1.28	-0.0289
1.29	-0.0711		1.29	-0.0367		1.29	-0.0418		1.29	-0.0425		1.29	-0.0289
1.3	-0.0714		1.3	-0.0367		1.3	-0.0417		1.3	-0.0426		1.3	-0.0289
1.31	-0.0712		1.31	-0.0367		1.31	-0.0417		1.31	-0.0426		1.31	-0.0289
1.32	-0.0709		1.32	-0.0369		1.32	-0.0417		1.32	-0.0426		1.32	-0.0288
1.32	-0.0706		1.32	-0.0369		1.32	-0.0417		1.32	-0.0426		1.32	-0.0288
1.33	-0.0707		1.33	-0.0369		1.33	-0.0416		1.33	-0.0426		1.33	-0.0289
1.34	-0.0705		1.34	-0.037		1.34	-0.0416		1.34	-0.0425		1.34	-0.0289
1.35	-0.0709		1.35	-0.0371		1.35	-0.0416		1.35	-0.0425		1.35	-0.0289
1.36	-0.0709		1.36	-0.0371		1.36	-0.0416		1.36	-0.0425		1.36	-0.0289
1.37	-0.0712		1.37	-0.0374		1.37	-0.0417		1.37	-0.0425		1.37	-0.0288
1.38	-0.0713		1.38	-0.0375		1.38	-0.0416		1.38	-0.0424		1.38	-0.0289
1.38	-0.0713		1.38	-0.0375		1.38	-0.0416		1.38	-0.0424		1.38	-0.0289
1.39	-0.0714		1.39	-0.0375		1.39	-0.0416		1.39	-0.0425		1.39	-0.0289
1.4	-0.0715		1.4	-0.0376		1.4	-0.0416		1.4	-0.0425		1.4	-0.0289
1.41	-0.0712		1.41	-0.0376		1.41	-0.0417		1.41	-0.0425		1.41	-0.0289
1.42	-0.071		1.42	-0.0376		1.42	-0.0416		1.42	-0.0425		1.42	-0.0289
1.43	-0.0709		1.43	-0.0377		1.43	-0.0416		1.43	-0.0426		1.43	-0.0289
1.43	-0.071		1.43	-0.0377		1.43	-0.0415		1.43	-0.0425		1.43	-0.0288
1.44	-0.0708		1.44	-0.0378		1.44	-0.0415		1.44	-0.0425		1.44	-0.0289
1.45	-0.0707		1.45	-0.0378		1.45	-0.0415		1.45	-0.0425		1.45	-0.0288
1.46	-0.0708		1.46	-0.0379		1.46	-0.0416		1.46	-0.0424		1.46	-0.0288
1.47	-0.0708		1.47	-0.0379		1.47	-0.0415		1.47	-0.0425		1.47	-0.0288
1.48	-0.0708		1.48	-0.038		1.48	-0.0416		1.48	-0.0425		1.48	-0.0288
1.48	-0.0707		1.48	-0.038		1.48	-0.0415		1.48	-0.0424		1.48	-0.0288
1.49	-0.0708		1.49	-0.038		1.49	-0.0415		1.49	-0.0423		1.49	-0.0288
1.5	-0.0707		1.5	-0.0381		1.5	-0.0416		1.5	-0.0422		1.5	-0.0289
1.51	-0.0707		1.51	-0.0381		1.51	-0.0415		1.51	-0.0422		1.51	-0.0289
1.52	-0.0707		1.52	-0.0382		1.52	-0.0415		1.52	-0.0422		1.52	-0.0289
1.52	-0.0706		1.52	-0.0382		1.52	-0.0415		1.52	-0.0422		1.52	-0.0289
1.53	-0.0706		1.53	-0.0383		1.53	-0.0415		1.53	-0.0422		1.53	-0.0289
1.54	-0.0706		1.54	-0.0384		1.54	-0.0413		1.54	-0.0421		1.54	-0.0289
1.55	-0.0703		1.55	-0.0384		1.55	-0.0411		1.55	-0.0417		1.55	-0.0289
1.56	-0.0702		1.56	-0.0385		1.56	-0.0412		1.56	-0.0417		1.56	-0.0289
1.57	-0.0701		1.57	-0.0386		1.57	-0.041		1.57	-0.0417		1.57	-0.0289
1.57	-0.0702		1.57	-0.0386		1.57	-0.0411		1.57	-0.0417		1.57	-0.0289
1.58	-0.0701		1.58	-0.0387		1.58	-0.0411		1.58	-0.0417		1.58	-0.0289
1.59	-0.07		1.59	-0.0388		1.59	-0.0411		1.59	-0.0417		1.59	-0.0289
1.6	-0.07		1.6	-0.0388		1.6	-0.0411		1.6	-0.0417		1.6	-0.0289
1.61	-0.0699		1.61	-0.0389		1.61	-0.0411		1.61	-0.0417		1.61	-0.0289
1.62	-0.0698		1.62	-0.039		1.62	-0.0411		1.62	-0.0417		1.62	-0.0289
1.62	-0.0697		1.62	-0.0391		1.62	-0.0411		1.62	-0.0417		1.62	-0.029
1.63	-0.0697		1.63	-0.0392		1.63	-0.0411		1.63	-0.0417		1.63	-0.029
1.64	-0.0699		1.64	-0.0392		1.64	-0.0411		1.64	-0.0418		1.64	-0.029
1.65	-0.0698		1.65	-0.0393		1.65	-0.0412		1.65	-0.0417		1.65	-0.029
1.66	-0.0699		1.66	-0.0387		1.66	-0.0412		1.66	-0.0418		1.66	-0.0291
1.67	-0.0699		1.67	-0.0387		1.67	-0.0411		1.67	-0.0418		1.67	-0.0291
1.68	-0.0698		1.68	-0.0387		1.68	-0.041		1.68	-0.0417		1.68	-0.0291
1.68	-0.0697		1.68	-0.0387		1.68	-0.041		1.68	-0.0418		1.68	-0.0291
1.69	-0.0694		1.69	-0.0387		1.69	-0.0411		1.69	-0.0418		1.69	-0.0291
1.7	-0.0693		1.7	-0.0387		1.7	-0.0411		1.7	-0.0418		1.7	-0.0292
1.71	-0.0692		1.71	-0.0388		1.71	-0.041		1.71	-0.0418		1.71	-0.0292
1.72	-0.0693		1.72	-0.0388		1.72	-0.0411		1.72	-0.0418		1.72	-0.0293
1.73	-0.0691		1.73	-0.0389		1.73	-0.0409		1.73	-0.0415		1.73	-0.0293
1.73	-0.0689		1.73	-0.039		1.73	-0.0411		1.73	-0.041		1.73	-0.0293
1.74	-0.0689		1.74	-0.0391		1.74	-0.0411		1.74	-0.0406		1.74	-0.0293
1.75	-0.069		1.75	-0.0391		1.75	-0.0411		1.75	-0.0406		1.75	-0.0293
1.76	-0.0693		1.76	-0.0392		1.76	-0.0412		1.76	-0.0405		1.76	-0.0293
1.77	-0.0695		1.77	-0.0393		1.77	-0.0413		1.77	-0.0406		1.77	-0.0293
1.77	-0.0698		1.77	-0.0393		1.77	-0.0413		1.77	-0.0405		1.77	-0.0294
1.78	-0.07		1.78	-0.0394		1.78	-0.0413		1.78	-0.0405		1.78	-0.0294
1.79	-0.0699		1.79	-0.0395		1.79	-0.0413		1.79	-0.0405		1.79	-0.0294
1.8	-0.0699		1.8	-0.0395		1.8	-0.0411		1.8	-0.0405		1.8	-0.0294
1.81	-0.07		1.81	-0.0397		1.81	-0.0412		1.81	-0.0406		1.81	-0.0294
1.82	-0.0703		1.82	-0.0397		1.82	-0.0411		1.82	-0.0406		1.82	-0.0294
1.82	-0.0702		1.82	-0.0398		1.82	-0.0412		1.82	-0.0406		1.82	-0.0295
1.83	-0.07		1.83	-0.0399		1.83	-0.0412		1.83	-0.0407		1.83	-0.0296
1.84	-0.0703		1.84	-0.04		1.84	-0.0413		1.84	-0.0406		1.84	-0.0296
1.85	-0.07		1.85	-0.0401		1.85	-0.0413		1.85	-0.0407		1.85	-0.0296
1.86	-0.0705		1.86	-0.0402		1.86	-0.0413		1.86	-0.0406		1.86	-0.0296
1.87	-0.0703		1.87	-0.0402		1.87	-0.0414		1.87	-0.0406		1.87	-0.0296
1.88	-0.0698		1.88	-0.0403		1.88	-0.0413		1.88	-0.0406		1.88	-0.0296
1.88	-0.0698		1.88	-0.0404		1.88	-0.0412		1.88	-0.0406		1.88	-0.0296
1.89	-0.0696		1.89	-0.0405		1.89	-0.0412		1.89	-0.0406		1.89	-0.0296
1.9	-0.0697		1.9	-0.0406		1.9	-0.0413		1.9	-0.0405		1.9	-0.0296
1.91	-0.0698		1.91	-0.0407		1.91	-0.0413		1.91	-0.0403		1.91	-0.0297
1.92	-0.0698		1.92	-0.0408		1.92	-0.0413		1.92	-0.0402		1.92	-0.0297
1.93	-0.0693		1.93	-0.0409		1.93	-0.0412		1.93	-0.04		1.93	-0.0297
1.93	-0.0692		1.93	-0.0402		1.93	-0.0412		1.93	-0.04		1.93	-0.0297
1.94	-0.069		1.94	-0.0402		1.94	-0.0412		1.94	-0.0399		1.94	-0.0297
1.95	-0.0688		1.95	-0.0402		1.95	-0.0413		1.95	-0.0399		1.95	-0.0297
1.96	-0.069		1.96	-0.0403		1.96	-0.0414		1.96	-0.0398		1.96	-0.0297
1.97	-0.0688		1.97	-0.0404		1.97	-0.0414		1.97	-0.0398		1.97	-0.0297
1.98	-0.0688		1.98	-0.0405		1.98	-0.0414		1.98	-0.0398		1.98	-0.0298
1.98	-0.069		1.98	-0.0406		1.98	-0.0414		1.98	-0.0398		1.98	-0.0298
1.99	-0.0695		1.99	-0.0406		1.99	-0.0413		1.99	-0.0398		1.99	-0.0297
2	-0.0695		2	-0.0405		2	-0.0406		2	-0.0398		2	-0.0298
2.01	-0.0692		2.01	-0.0406		2.01	-0.0407		2.01	-0.0398		2.01	-0.0299
2.02	-0.0693		2.02	-0.0407		2.02	-0.0407		2.02	-0.0398		2.02	-0.0299
2.02	-0.0693		2.02	-0.0407		2.02	-0.0407		2.02	-0.0398		2.02	-0.0299
2.03	-0.0698		2.03	-0.0408		2.03	-0.0406		2.03	-0.0398		2.03	-0.0299
2.04	-0.0696		2.04	-0.0409		2.04	-0.0407		2.04	-0.0398		2.04	-0.0299
2.05	-0.0701		2.05	-0.041		2.05	-0.0407		2.05	-0.0399		2.05	-0.0299
2.06	-0.0702		2.06	-0.0411		2.06	-0.0405		2.06	-0.0399		2.06	-0.03
2.07	-0.0695		2.07	-0.0412		2.07	-0.0405		2.07	-0.0399		2.07	-0.0299
2.08	-0.0692		2.08	-0.015		2.08	-0.0405		2.08	-0.0399		2.08	-0.0299
2.08	-0.0694		2.08	-0.0056		2.08	-0.0405		2.08	-0.0399		2.08	-0.0299
2.08	-0.0236		2.09	-0.0043		2.08	-0.0148		2.08	-0.0144		2.08	-0.0135
2.09	-0.0118		2.1	0.0197		2.09	-0.0066		2.09	-0.0068		2.09	-0.005
2.1	-0.0093		2.11	0.029		2.1	-0.0049		2.1	-0.0056		2.1	-0.0043
2.1	-0.0088		2.12	0.03		2.1	0.0176		2.1	0.0178		2.1	-0.004
2.11	0.0447		2.12	0.0301		2.11	0.0258		2.11	0.0259		2.11	0.0235
2.12	0.0488		2.13	0.0298		2.12	0.0279		2.12	0.0279		2.12	0.0249
2.12	0.0508		2.14	0.0295		2.12	0.0284		2.12	0.0285		2.12	0.0252
2.13	0.0516		2.15	0.0292		2.13	0.0282		2.13	0.0283		2.13	0.0254
2.14	0.0519		2.16	0.029		2.14	0.0275		2.14	0.028		2.14	0.0254
2.15	0.0524		2.17	0.028		2.15	0.0269		2.15	0.0275		2.15	0.0254
2.16	0.0525		2.17	0.0278		2.16	0.0263		2.16	0.027		2.16	0.0253
2.17	0.0521		2.17	0.0277		2.17	0.0258		2.17	0.0264		2.17	0.0252
2.17	0.0528		2.18	0.0275		2.17	0.0253		2.17	0.026		2.17	0.0251
2.18	0.053		2.18	0.0274		2.18	0.0249		2.18	0.0255		2.18	0.0251
2.19	0.0532		2.19	0.0272		2.19	0.0245		2.19	0.0251		2.19	0.025
2.2	0.053		2.2	0.0271		2.2	0.0242		2.2	0.0247		2.2	0.0249
2.21	0.0531		2.21	0.027		2.21	0.0239		2.21	0.0243		2.21	0.0249
2.22	0.0532		2.22	0.0269		2.22	0.0236		2.22	0.024		2.22	0.0248
2.22	0.0534		2.22	0.0268		2.22	0.0234		2.22	0.0237		2.22	0.0247
2.23	0.0536		2.23	0.0267		2.23	0.0232		2.23	0.0234		2.23	0.0247
2.24	0.0535		2.24	0.0266		2.24	0.023		2.24	0.0231		2.24	0.0246
2.25	0.0534		2.25	0.0265		2.25	0.0228		2.25	0.0229		2.25	0.0246
2.26	0.0534		2.26	0.0264		2.26	0.0226		2.26	0.0227		2.26	0.0245
2.27	0.0534		2.27	0.0264		2.27	0.0224		2.27	0.0225		2.27	0.0244
2.27	0.0533		2.27	0.0263		2.27	0.0224		2.27	0.0223		2.27	0.0244
2.28	0.0534		2.28	0.0263		2.28	0.0222		2.28	0.0221		2.28	0.0244
2.29	0.0534		2.29	0.0262		2.29	0.0221		2.29	0.022		2.29	0.0243
2.3	0.0544		2.3	0.0261		2.3	0.0219		2.3	0.0218		2.3	0.0243
2.31	0.0548		2.31	0.0261		2.31	0.0218		2.31	0.0216		2.31	0.0242
2.32	0.0546		2.32	0.026		2.32	0.0217		2.32	0.0214		2.32	0.0241
2.32	0.0545		2.32	0.026		2.32	0.0215		2.32	0.0213		2.32	0.0241
2.33	0.0541		2.33	0.026		2.33	0.0214		2.33	0.0212		2.33	0.0241
2.34	0.0532		2.34	0.0259		2.34	0.0213		2.34	0.0211		2.34	0.024
2.35	0.0529		2.35	0.0258		2.35	0.0211		2.35	0.021		2.35	0.0239
2.36	0.0531		2.36	0.0258		2.36	0.021		2.36	0.0209		2.36	0.0239
2.37	0.0531		2.37	0.0257		2.37	0.0209		2.37	0.0208		2.37	0.0239
2.37	0.0528		2.37	0.0257		2.37	0.0208		2.37	0.0207		2.37	0.0238
2.38	0.0527		2.38	0.0257		2.38	0.0207		2.38	0.0207		2.38	0.0237
2.39	0.0525		2.39	0.0257		2.39	0.0206		2.39	0.0206		2.39	0.0237
2.4	0.0523		2.4	0.0256		2.4	0.0205		2.4	0.0205		2.4	0.0236
2.41	0.0522		2.41	0.0256		2.41	0.0203		2.41	0.0205		2.41	0.0236
2.42	0.0519		2.42	0.0256		2.42	0.0203		2.42	0.0204		2.42	0.0236
2.42	0.052		2.42	0.0255		2.42	0.0202		2.42	0.0204		2.42	0.0235
2.43	0.0521		2.43	0.0255		2.43	0.0201		2.43	0.0204		2.43	0.0235
2.44	0.0523		2.44	0.0255		2.44	0.0201		2.44	0.0204		2.44	0.0234
2.45	0.0522		2.45	0.0255		2.45	0.02		2.45	0.0204		2.45	0.0234
2.46	0.0521		2.46	0.0254		2.46	0.0199		2.46	0.0203		2.46	0.0234
2.47	0.0522		2.47	0.0254		2.47	0.0199		2.47	0.0203		2.47	0.0233
2.47	0.0519		2.47	0.0254		2.47	0.0198		2.47	0.0203		2.47	0.0233
2.48	0.0514		2.48	0.0254		2.48	0.0198		2.48	0.0203		2.48	0.0232
2.49	0.0516		2.49	0.0254		2.49	0.0197		2.49	0.0203		2.49	0.0232
2.5	0.052		2.5	0.0254		2.5	0.0197		2.5	0.0204		2.5	0.0231
2.51	0.0522		2.51	0.0254		2.51	0.0197		2.51	0.0204		2.51	0.0231
2.52	0.0525		2.52	0.0254		2.52	0.0197		2.52	0.0204		2.52	0.0231
2.52	0.0528		2.52	0.0254		2.52	0.0196		2.52	0.0204		2.52	0.0231
2.53	0.0527		2.53	0.0254		2.53	0.0196		2.53	0.0204		2.53	0.023
2.54	0.0526		2.54	0.0254		2.54	0.0197		2.54	0.0205		2.54	0.0229
2.55	0.0526		2.55	0.0254		2.55	0.0196		2.55	0.0206		2.55	0.0229
2.56	0.0532		2.56	0.0254		2.56	0.0197		2.56	0.0206		2.56	0.0229
2.57	0.0534		2.57	0.0254		2.57	0.0196		2.57	0.0206		2.57	0.0229
2.57	0.0537		2.57	0.0254		2.57	0.0197		2.57	0.0207		2.57	0.0229
2.58	0.0537		2.58	0.0254		2.58	0.0197		2.58	0.0207		2.58	0.0228
2.59	0.0536		2.59	0.0254		2.59	0.0197		2.59	0.0208		2.59	0.0228
2.6	0.0534		2.6	0.0254		2.6	0.0198		2.6	0.0209		2.6	0.0228
2.61	0.0531		2.61	0.0255		2.61	0.0198		2.61	0.0209		2.61	0.0227
2.62	0.0527		2.62	0.0255		2.62	0.0199		2.62	0.021		2.62	0.0227
2.62	0.0525		2.62	0.0255		2.62	0.0199		2.62	0.021		2.62	0.0226
2.63	0.0522		2.63	0.0255		2.63	0.0199		2.63	0.021		2.63	0.0226
2.64	0.0518		2.64	0.0255		2.64	0.02		2.64	0.0211		2.64	0.0226
2.65	0.0513		2.65	0.0255		2.65	0.0201		2.65	0.0211		2.65	0.0226
2.66	0.0509		2.66	0.0255		2.66	0.0201		2.66	0.0212		2.66	0.0226
2.67	0.0508		2.67	0.0255		2.67	0.0202		2.67	0.0213		2.67	0.0225
2.67	0.0506		2.67	0.0255		2.67	0.0202		2.67	0.0213		2.67	0.0225
2.68	0.0505		2.68	0.0255		2.68	0.0203		2.68	0.0214		2.68	0.0225
2.69	0.0502		2.69	0.0255		2.69	0.0204		2.69	0.0214		2.69	0.0224
2.7	0.0501		2.7	0.0256		2.7	0.0204		2.7	0.0214		2.7	0.0224
2.71	0.0503		2.71	0.0256		2.71	0.0205		2.71	0.0215		2.71	0.0224
2.72	0.0502		2.72	0.0256		2.72	0.0205		2.72	0.0215		2.72	0.0224
2.72	0.0502		2.72	0.0256		2.72	0.0206		2.72	0.0216		2.72	0.0224
2.73	0.0501		2.73	0.0256		2.73	0.0206		2.73	0.0216		2.73	0.0224
2.74	0.0492		2.74	0.0256		2.74	0.0206		2.74	0.0216		2.74	0.0224
2.75	0.0488		2.75	0.0256		2.75	0.0208		2.75	0.0217		2.75	0.0224
2.76	0.0487		2.76	0.0256		2.76	0.0208		2.76	0.0217		2.76	0.0223
2.77	0.0483		2.77	0.0256		2.77	0.0209		2.77	0.0218		2.77	0.0224
2.77	0.048		2.77	0.0257		2.77	0.021		2.77	0.0218		2.77	0.0224
2.78	0.0478		2.78	0.0257		2.78	0.021		2.78	0.0219		2.78	0.0223
2.79	0.0476		2.79	0.0257		2.79	0.021		2.79	0.0219		2.79	0.0223
2.8	0.0475		2.8	0.0257		2.8	0.0211		2.8	0.0219		2.8	0.0223
2.81	0.0471		2.81	0.0257		2.81	0.0212		2.81	0.022		2.81	0.0223
2.82	0.0462		2.82	0.0257		2.82	0.0212		2.82	0.022		2.82	0.0223
2.82	0.0456		2.82	0.0257		2.82	0.0212		2.82	0.022		2.82	0.0223
2.83	0.0454		2.83	0.0258		2.83	0.0213		2.83	0.022		2.83	0.0222
2.84	0.0454		2.84	0.0258		2.84	0.0213		2.84	0.0221		2.84	0.0223
2.85	0.0452		2.85	0.0258		2.85	0.0214		2.85	0.0221		2.85	0.0222
2.86	0.045		2.86	0.0258		2.86	0.0214		2.86	0.0221		2.86	0.0222
2.87	0.0444		2.87	0.0258		2.87	0.0214		2.87	0.0221		2.87	0.0222
2.87	0.044		2.87	0.0259		2.87	0.0215		2.87	0.0222		2.87	0.0222
2.88	0.0437		2.88	0.0259		2.88	0.0215		2.88	0.0222		2.88	0.0222
2.89	0.0435		2.89	0.0259		2.89	0.0216		2.89	0.0222		2.89	0.0222
2.9	0.0434		2.9	0.0259		2.9	0.0216		2.9	0.0222		2.9	0.0222
2.91	0.0434		2.91	0.0259		2.91	0.0217		2.91	0.0223		2.91	0.0222
2.92	0.0433		2.92	0.0259		2.92	0.0217		2.92	0.0223		2.92	0.0222
2.92	0.0434		2.92	0.026		2.92	0.0217		2.92	0.0223		2.92	0.0222
2.93	0.0432		2.93	0.026		2.93	0.0218		2.93	0.0223		2.93	0.0222
2.94	0.0432		2.94	0.026		2.94	0.0218		2.94	0.0223		2.94	0.0222
2.95	0.0433		2.95	0.026		2.95	0.0218		2.95	0.0223		2.95	0.0222
2.96	0.0433		2.96	0.026		2.96	0.0219		2.96	0.0224		2.96	0.0222
2.97	0.0431		2.97	0.026		2.97	0.0219		2.97	0.0224		2.97	0.0222
2.97	0.0426		2.97	0.0261		2.97	0.0219		2.97	0.0224		2.97	0.0222
2.98	0.0427		2.98	0.0261		2.98	0.022		2.98	0.0225		2.98	0.0222
2.99	0.0424		2.99	0.0261		2.99	0.022		2.99	0.0225		2.99	0.0222
3	0.042		3	0.0261		3	0.0221		3	0.0225		3	0.0222
3.01	0.042		3.01	0.0261		3.01	0.0221		3.01	0.0225		3.01	0.0222
3.02	0.0415		3.02	0.0262		3.02	0.0222		3.02	0.0225		3.02	0.0222
3.02	0.0415		3.02	0.0262		3.02	0.0222		3.02	0.0225		3.02	0.0223
3.03	0.0414		3.03	0.0262		3.03	0.0222		3.03	0.0225		3.03	0.0222
3.04	0.0413		3.04	0.0262		3.04	0.0222		3.04	0.0225		3.04	0.0223
3.05	0.0413		3.05	0.0262		3.05	0.0222		3.05	0.0225		3.05	0.0223
3.06	0.041		3.06	0.0263		3.06	0.0223		3.06	0.0226		3.06	0.0223
3.07	0.041		3.07	0.0263		3.07	0.0223		3.07	0.0226		3.07	0.0223
3.07	0.0407		3.07	0.0263		3.07	0.0224		3.07	0.0226		3.07	0.0223
3.08	0.0406		3.08	0.0263		3.08	0.0224		3.08	0.0227		3.08	0.0223
3.09	0.0403		3.09	0.0263		3.09	0.0224		3.09	0.0226		3.09	0.0223
3.1	0.0402		3.1	0.0263		3.1	0.0225		3.1	0.0227		3.1	0.0224
3.11	0.0401		3.11	0.0263		3.11	0.0225		3.11	0.0227		3.11	0.0224
3.12	0.0401		3.12	0.0263		3.12	0.0225		3.12	0.0227		3.12	0.0224
3.12	0.04		3.12	0.0264		3.12	0.0226		3.12	0.0227		3.12	0.0224
3.13	0.0402		3.13	0.0264		3.13	0.0226		3.13	0.0227		3.13	0.0224
3.14	0.0402		3.14	0.0264		3.14	0.0227		3.14	0.0228		3.14	0.0224
3.15	0.0401		3.15	0.0265		3.15	0.0227		3.15	0.0228		3.15	0.0224
3.16	0.0402		3.16	0.0265		3.16	0.0228		3.16	0.0228		3.16	0.0224
3.17	0.0402		3.17	0.0265		3.17	0.0228		3.17	0.0229		3.17	0.0224
3.17	0.0402		3.17	0.0265		3.17	0.0229		3.17	0.0229		3.17	0.0224
3.18	0.0402		3.18	0.0265		3.18	0.0229		3.18	0.0229		3.18	0.0224
3.19	0.0402		3.19	0.0265		3.19	0.023		3.19	0.0229		3.19	0.0225
3.2	0.0402		3.2	0.0266		3.2	0.023		3.2	0.0229		3.2	0.0224
3.21	0.0403		3.21	0.0266		3.21	0.023		3.21	0.0231		3.21	0.0225
3.22	0.0402		3.22	0.0266		3.22	0.0231		3.22	0.0231		3.22	0.0225
3.22	0.0404		3.22	0.0266		3.22	0.0231		3.22	0.023		3.22	0.0225
3.23	0.0404		3.23	0.0267		3.23	0.0232		3.23	0.0231		3.23	0.0226
3.24	0.0404		3.24	0.0267		3.24	0.0232		3.24	0.0231		3.24	0.0226
3.25	0.0402		3.25	0.0267		3.25	0.0233		3.25	0.0231		3.25	0.0226
3.26	0.0401		3.26	0.0268		3.26	0.0233		3.26	0.0232		3.26	0.0226
3.27	0.0401		3.27	0.0267		3.27	0.0234		3.27	0.0232		3.27	0.0226
3.27	0.0402		3.27	0.0268		3.27	0.0235		3.27	0.0233		3.27	0.0227
3.28	0.0403		3.28	0.0268		3.28	0.0235		3.28	0.0233		3.28	0.0227
3.29	0.0404		3.29	0.0269		3.29	0.0235		3.29	0.0233		3.29	0.0227
3.3	0.0404		3.3	0.0269		3.3	0.0236		3.3	0.0233		3.3	0.0227
3.31	0.0404		3.31	0.0269		3.31	0.0237		3.31	0.0234		3.31	0.0227
3.32	0.0404		3.32	0.027		3.32	0.0237		3.32	0.0234		3.32	0.0228
3.32	0.0405		3.32	0.027		3.32	0.0236		3.32	0.0235		3.32	0.0228
3.33	0.0404		3.33	0.0271		3.33	0.0237		3.33	0.0235		3.33	0.0228
3.34	0.0404		3.34	0.0271		3.34	0.0237		3.34	0.0236		3.34	0.0229
3.35	0.0404		3.35	0.0271		3.35	0.0238		3.35	0.0236		3.35	0.0229
3.36	0.0405		3.36	0.0271		3.36	0.0238		3.36	0.0236		3.36	0.0229
3.37	0.0406		3.37	0.0272		3.37	0.0239		3.37	0.0237		3.37	0.0229
3.37	0.0407		3.37	0.0272		3.37	0.0239		3.37	0.0237		3.37	0.0229
3.38	0.0408		3.38	0.0272		3.38	0.024		3.38	0.0237		3.38	0.0229
3.39	0.041		3.39	0.0273		3.39	0.024		3.39	0.0238		3.39	0.0229
3.4	0.0411		3.4	0.0273		3.4	0.0241		3.4	0.0238		3.4	0.023
3.41	0.0412		3.41	0.0274		3.41	0.0242		3.41	0.0239		3.41	0.023
3.42	0.0414		3.42	0.0274		3.42	0.0242		3.42	0.0239		3.42	0.0231
3.42	0.0414		3.42	0.0274		3.42	0.0243		3.42	0.024		3.42	0.0231
3.43	0.0414		3.43	0.0275		3.43	0.0244		3.43	0.024		3.43	0.0231
3.44	0.0415		3.44	0.0275		3.44	0.0245		3.44	0.024		3.44	0.0231
3.45	0.0416		3.45	0.0276		3.45	0.0245		3.45	0.0241		3.45	0.0232
3.46	0.0416		3.46	0.0276		3.46	0.0246		3.46	0.0242		3.46	0.0232
3.47	0.0417		3.47	0.0277		3.47	0.0247		3.47	0.0242		3.47	0.0233
3.47	0.0417		3.47	0.0277		3.47	0.0248		3.47	0.0243		3.47	0.0233
3.48	0.0419		3.48	0.0278		3.48	0.0249		3.48	0.0244		3.48	0.0234
3.49	0.0421		3.49	0.0279		3.49	0.025		3.49	0.0244		3.49	0.0234
3.5	0.0423		3.5	0.0279		3.5	0.025		3.5	0.0245		3.5	0.0234
3.51	0.0424		3.51	0.028		3.51	0.0252		3.51	0.0246		3.51	0.0235
3.52	0.0425		3.52	0.028		3.52	0.0252		3.52	0.0247		3.52	0.0235
3.52	0.0427		3.52	0.0282		3.52	0.0254		3.52	0.0248		3.52	0.0236
3.53	0.0429		3.53	0.0282		3.53	0.0255		3.53	0.0249		3.53	0.0236
3.54	0.0429		3.54	0.0283		3.54	0.0256		3.54	0.025		3.54	0.0236
3.55	0.0429		3.55	0.0284		3.55	0.0257		3.55	0.025		3.55	0.0237
3.56	0.043		3.56	0.0285		3.56	0.0258		3.56	0.0252		3.56	0.0238
3.57	0.0431		3.57	0.0286		3.57	0.026		3.57	0.0253		3.57	0.0239
3.57	0.0433		3.57	0.0287		3.57	0.0261		3.57	0.0254		3.57	0.0239
3.58	0.0436		3.58	0.0287		3.58	0.0262		3.58	0.0255		3.58	0.0239
3.59	0.0438		3.59	0.0289		3.59	0.0264		3.59	0.0257		3.59	0.024
3.6	0.0441		3.6	0.029		3.6	0.0265		3.6	0.0257		3.6	0.024
3.61	0.0443		3.61	0.0291		3.61	0.0266		3.61	0.0258		3.61	0.0241
3.62	0.0445		3.62	0.0292		3.62	0.0268		3.62	0.026		3.62	0.0242
3.62	0.0446		3.62	0.0293		3.62	0.0269		3.62	0.0261		3.62	0.0243
3.63	0.0451		3.63	0.0295		3.63	0.0271		3.63	0.0263		3.63	0.0244
3.64	0.0456		3.64	0.0296		3.64	0.0273		3.64	0.0265		3.64	0.0244
3.65	0.046		3.65	0.0298		3.65	0.0274		3.65	0.0266		3.65	0.0245
3.66	0.0462		3.66	0.03		3.66	0.0276		3.66	0.0268		3.66	0.0246
3.67	0.0465		3.67	0.0302		3.67	0.0278		3.67	0.0269		3.67	0.0246
3.67	0.047		3.67	0.0303		3.67	0.028		3.67	0.0271		3.67	0.0247
3.68	0.0475		3.68	0.0305		3.68	0.0282		3.68	0.0274		3.68	0.0248
3.69	0.0476		3.69	0.0307		3.69	0.0284		3.69	0.0275		3.69	0.0249
3.7	0.0481		3.7	0.0309		3.7	0.0285		3.7	0.0277		3.7	0.0249
3.71	0.0486		3.71	0.0312		3.71	0.0287		3.71	0.0279		3.71	0.025
3.72	0.0492		3.72	0.0314		3.72	0.0289		3.72	0.0282		3.72	0.0251
3.72	0.0499		3.72	0.0317		3.72	0.0292		3.72	0.0284		3.72	0.0252
3.73	0.0506		3.73	0.032		3.73	0.0294		3.73	0.0287		3.73	0.0253
3.74	0.0516		3.74	0.0323		3.74	0.0297		3.74	0.0289		3.74	0.0254
3.75	0.0525		3.75	0.0326		3.75	0.0299		3.75	0.0293		3.75	0.0255
3.76	0.0536		3.76	0.033		3.76	0.0302		3.76	0.0296		3.76	0.0256
3.77	0.055		3.77	0.0334		3.77	0.0306		3.77	0.0299		3.77	0.0257
3.77	0.0568		3.77	0.0338		3.77	0.0308		3.77	0.0302		3.77	0.0259
3.78	0.0584		3.78	0.0343		3.78	0.0312		3.78	0.0306		3.78	0.026
3.79	0.0602		3.79	0.0348		3.79	0.0315		3.79	0.0309		3.79	0.0261
3.8	0.0627		3.8	0.0353		3.8	0.0318		3.8	0.0313		3.8	0.0263
3.81	0.0653		3.81	0.0359		3.81	0.0321		3.81	0.0317		3.81	0.0264
3.82	0.0684		3.82	0.0366		3.82	0.0326		3.82	0.0321		3.82	0.0266
3.82	0.0726		3.82	0.0374		3.82	0.033		3.82	0.0325		3.82	0.0268
3.83	0.0771		3.83	0.0382		3.83	0.0335		3.83	0.033		3.83	0.027
3.84	0.0826		3.84	0.0391		3.84	0.0339		3.84	0.0336		3.84	0.0272
3.85	0.0898		3.85	0.04		3.85	0.0344		3.85	0.0341		3.85	0.0274
3.86	0.0977		3.86	0.0409		3.86	0.035		3.86	0.0348		3.86	0.0276
3.87	0.112		3.87	0.0419		3.87	0.0356		3.87	0.0354		3.87	0.0279
3.87	0.1387		3.87	0.043		3.87	0.0363		3.87	0.0362		3.87	0.0282
3.88	0.2143		3.88	0.0442		3.88	0.037		3.88	0.037		3.88	0.0285
3.89	0.5394		3.89	0.0456		3.89	0.0377		3.89	0.0379		3.89	0.0289
3.89	0.1339		3.9	0.0471		3.9	0.0385		3.9	0.039		3.9	0.0292
3.89	0.0257		3.91	0.0491		3.91	0.0394		3.91	0.0402		3.91	0.0296
3.9	0.0206		3.92	0.0514		3.92	0.0404		3.92	0.0417		3.92	0.0419
3.9	-0.0733		3.92	0.0543		3.92	0.0415		3.92	0.0435		3.92	0.0426
3.91	-0.0382		3.93	0.058		3.93	0.0428		3.93	0.0459		3.93	0.0433
3.92	-0.0368		3.94	0.0629		3.94	0.0444		3.94	0.0492		3.94	0.0442
3.93	-0.0363		3.95	0.0698		3.95	0.0462		3.95	0.0536		3.95	0.0452
3.94	-0.0359		3.96	0.0807		3.96	0.0487		3.96	0.0594		3.96	0.0464
3.94	-0.0356		3.97	0.0984		3.97	0.0517		3.97	0.0676		3.97	0.048
3.95	-0.0353		3.97	0.1246		3.97	0.0563		3.97	0.081		3.97	0.0498
3.96	-0.0351		3.98	0.1616		3.98	0.0621		3.98	0.1036		3.98	0.052
3.97	-0.0349		3.99	0.2088		3.99	0.073		3.99	0.1381		3.99	0.0548
3.98	-0.0347		4	0.2921		4	0.1018		4	0.2621		4	0.0589
3.99	-0.0345		4.01	0.5119		4.01	0.1979		4	0.507		4.01	0.0663
3.99	-0.0343		4.02	0.4		4.01	0.5014		4	0.2088		4.02	0.0812
4	-0.0341		4.02	0.0307		4.01	0.239		4.01	0.0331		4.02	0.1267
4.01	-0.034		4.03	0.0243		4.02	0.0218		4.02	0.0267		4.03	0.2699
4.02	-0.0339		4.04	0.0238		4.03	0.0178		4.02	-0.0207		4.04	0.5013
4.03	-0.0337		4.05	-0.0303		4.03	-0.0222		4.03	-0.0215		4.04	0.1792
4.04	-0.0337		4.06	-0.0292		4.04	-0.0249		4.04	-0.021		4.04	0.0232
4.04	-0.0337		4.07	-0.0285		4.05	-0.024		4.04	-0.0209		4.05	0.0187
4.05	-0.0337		4.07	-0.028		4.05	-0.0235		4.05	-0.0208		4.05	-0.0102
4.06	-0.0336		4.08	-0.0275		4.06	-0.0231		4.06	-0.0207		4.06	-0.0196
4.07	-0.0335		4.09	-0.0272		4.07	-0.0227		4.07	-0.0206		4.07	-0.0199
4.08	-0.0335		4.1	-0.0268		4.08	-0.0223		4.08	-0.0204		4.08	-0.0202
4.09	-0.0335		4.1	-0.0265		4.09	-0.0221		4.09	-0.0203		4.09	-0.0204
4.09	-0.0334		4.1	-0.0263		4.1	-0.0218		4.09	-0.0201		4.09	-0.0206
4.1	-0.0334		4.11	-0.026		4.1	-0.0215		4.1	-0.02		4.1	-0.0207
4.11	-0.0334		4.12	-0.0258		4.11	-0.0213		4.11	-0.0198		4.11	-0.0209
4.12	-0.0335		4.12	-0.0256		4.12	-0.021		4.12	-0.0197		4.12	-0.0209
4.13	-0.0337		4.13	-0.0255		4.13	-0.0208		4.13	-0.0195		4.13	-0.021
4.14	-0.0336		4.14	-0.0253		4.14	-0.0206		4.14	-0.0194		4.14	-0.0211
4.14	-0.0336		4.15	-0.0251		4.15	-0.0204		4.14	-0.0193		4.14	-0.0211
4.15	-0.0339		4.15	-0.025		4.15	-0.0202		4.15	-0.0191		4.15	-0.0212
4.16	-0.0338		4.16	-0.0248		4.16	-0.0201		4.16	-0.019		4.16	-0.0214
4.17	-0.0339		4.17	-0.0248		4.17	-0.0199		4.17	-0.019		4.17	-0.0215
4.18	-0.0338		4.18	-0.0246		4.18	-0.0198		4.18	-0.0189		4.18	-0.0215
4.19	-0.0337		4.19	-0.0246		4.19	-0.0197		4.19	-0.0188		4.19	-0.0216
4.19	-0.0337		4.2	-0.0245		4.2	-0.0196		4.19	-0.0188		4.19	-0.0216
4.2	-0.0337		4.2	-0.0245		4.2	-0.0195		4.2	-0.0188		4.2	-0.0216
4.21	-0.0336		4.21	-0.0244		4.21	-0.0194		4.21	-0.0187		4.21	-0.0216
4.22	-0.0335		4.22	-0.0244		4.22	-0.0194		4.22	-0.0187		4.22	-0.0217
4.23	-0.0335		4.23	-0.0244		4.23	-0.0193		4.23	-0.0187		4.23	-0.0219
4.24	-0.0329		4.24	-0.0243		4.24	-0.0193		4.24	-0.0187		4.24	-0.0219
4.24	-0.0328		4.25	-0.0243		4.25	-0.0192		4.24	-0.0187		4.24	-0.0234
4.25	-0.0327		4.25	-0.0243		4.25	-0.0192		4.25	-0.0186		4.25	-0.0234
4.26	-0.0327		4.26	-0.0243		4.26	-0.0192		4.26	-0.0187		4.26	-0.0234
4.27	-0.0328		4.27	-0.0244		4.27	-0.0192		4.27	-0.0187		4.27	-0.0234
4.28	-0.0328		4.28	-0.0244		4.28	-0.0192		4.28	-0.0187		4.28	-0.0234
4.29	-0.0327		4.29	-0.0244		4.29	-0.0192		4.29	-0.0187		4.29	-0.0234
4.29	-0.0327		4.3	-0.0245		4.3	-0.0192		4.29	-0.0187		4.29	-0.0234
4.3	-0.0328		4.3	-0.0245		4.3	-0.0193		4.3	-0.0188		4.3	-0.0234
4.31	-0.0329		4.31	-0.0245		4.31	-0.0193		4.31	-0.0188		4.31	-0.0234
4.32	-0.0332		4.32	-0.0245		4.32	-0.0193		4.32	-0.0188		4.32	-0.0234
4.33	-0.0335		4.33	-0.0246		4.33	-0.0193		4.33	-0.0188		4.33	-0.0234
4.34	-0.0337		4.34	-0.0246		4.34	-0.0194		4.34	-0.0189		4.34	-0.0234
4.34	-0.0339		4.35	-0.0246		4.35	-0.0194		4.34	-0.0189		4.34	-0.0233
4.35	-0.0341		4.35	-0.0247		4.35	-0.0194		4.35	-0.0189		4.35	-0.0233
4.36	-0.0341		4.36	-0.0248		4.36	-0.0194		4.36	-0.019		4.36	-0.0232
4.37	-0.0343		4.37	-0.0248		4.37	-0.0195		4.37	-0.0191		4.37	-0.0232
4.38	-0.0358		4.38	-0.0248		4.38	-0.0195		4.38	-0.0191		4.38	-0.0232
4.39	-0.0402		4.39	-0.0249		4.39	-0.0195		4.39	-0.0191		4.39	-0.0232
4.39	-0.0403		4.4	-0.0249		4.4	-0.0196		4.39	-0.0192		4.39	-0.0232
4.4	-0.0403		4.4	-0.0249		4.4	-0.0196		4.4	-0.0192		4.4	-0.0232
4.41	-0.0404		4.41	-0.025		4.41	-0.0197		4.41	-0.0193		4.41	-0.0232
4.42	-0.0406		4.42	-0.025		4.42	-0.0197		4.42	-0.0194		4.42	-0.0231
4.43	-0.0407		4.43	-0.0251		4.43	-0.0198		4.43	-0.0194		4.43	-0.0231
4.44	-0.0408		4.44	-0.0251		4.44	-0.0198		4.44	-0.0195		4.44	-0.0231
4.44	-0.0409		4.45	-0.0252		4.45	-0.0199		4.44	-0.0196		4.44	-0.0231
4.45	-0.0411		4.45	-0.0252		4.45	-0.0199		4.45	-0.0196		4.45	-0.0231
4.46	-0.0412		4.46	-0.0253		4.46	-0.02		4.46	-0.0197		4.46	-0.0231
4.47	-0.0414		4.47	-0.0253		4.47	-0.02		4.47	-0.0198		4.47	-0.0231
4.48	-0.0416		4.48	-0.0254		4.48	-0.0201		4.48	-0.0199		4.48	-0.0231
4.49	-0.0418		4.49	-0.0254		4.49	-0.0201		4.49	-0.0199		4.49	-0.0231
4.49	-0.0421		4.5	-0.0254		4.5	-0.0203		4.49	-0.02		4.49	-0.0231
4.5	-0.0423		4.5	-0.0255		4.5	-0.0203		4.5	-0.02		4.5	-0.0231
4.51	-0.0425		4.51	-0.0255		4.51	-0.0203		4.51	-0.0201		4.51	-0.0231
4.52	-0.0426		4.52	-0.0256		4.52	-0.0204		4.52	-0.0202		4.52	-0.0231
4.53	-0.0428		4.53	-0.0256		4.53	-0.0204		4.53	-0.0202		4.53	-0.023
4.54	-0.0429		4.54	-0.0257		4.54	-0.0205		4.54	-0.0203		4.54	-0.0231
4.54	-0.0432		4.55	-0.0257		4.55	-0.0205		4.54	-0.0204		4.54	-0.0231
4.55	-0.0434		4.55	-0.0257		4.55	-0.0206		4.55	-0.0204		4.55	-0.023
4.56	-0.0436		4.56	-0.0258		4.56	-0.0207		4.56	-0.0204		4.56	-0.0231
4.57	-0.0439		4.57	-0.0258		4.57	-0.0207		4.57	-0.0205		4.57	-0.0231
4.58	-0.0442		4.58	-0.0258		4.58	-0.0208		4.58	-0.0206		4.58	-0.0231
4.59	-0.0445		4.59	-0.0259		4.59	-0.0208		4.59	-0.0206		4.59	-0.0231
4.59	-0.0448		4.6	-0.0259		4.6	-0.0209		4.59	-0.0206		4.59	-0.0231
4.6	-0.0451		4.6	-0.026		4.6	-0.021		4.6	-0.0207		4.6	-0.0231
4.61	-0.0455		4.61	-0.026		4.61	-0.021		4.61	-0.0207		4.61	-0.0231
4.62	-0.0458		4.62	-0.0261		4.62	-0.0211		4.62	-0.0208		4.62	-0.0231
4.63	-0.046		4.63	-0.0261		4.63	-0.0212		4.63	-0.0209		4.63	-0.0231
4.64	-0.0463		4.64	-0.0262		4.64	-0.0212		4.64	-0.0209		4.64	-0.0231
4.64	-0.0466		4.65	-0.0262		4.65	-0.0212		4.64	-0.021		4.64	-0.0231
4.65	-0.0468		4.65	-0.0263		4.65	-0.0213		4.65	-0.021		4.65	-0.0231
4.66	-0.0468		4.66	-0.0263		4.66	-0.0213		4.66	-0.0211		4.66	-0.0231
4.67	-0.0471		4.67	-0.0264		4.67	-0.0214		4.67	-0.0211		4.67	-0.0231
4.68	-0.0474		4.68	-0.0264		4.68	-0.0214		4.68	-0.0212		4.68	-0.0231
4.69	-0.0476		4.69	-0.0264		4.69	-0.0215		4.69	-0.0213		4.69	-0.0231
4.69	-0.0478		4.7	-0.0264		4.7	-0.0215		4.69	-0.0213		4.69	-0.0231
4.7	-0.0479		4.7	-0.0265		4.7	-0.0215		4.7	-0.0213		4.7	-0.0231
4.71	-0.0479		4.71	-0.0265		4.71	-0.0216		4.71	-0.0213		4.71	-0.0231
4.72	-0.0481		4.72	-0.0266		4.72	-0.0216		4.72	-0.0214		4.72	-0.0231
4.73	-0.0483		4.73	-0.0266		4.73	-0.0217		4.73	-0.0215		4.73	-0.0231
4.74	-0.0484		4.74	-0.0267		4.74	-0.0217		4.74	-0.0215		4.74	-0.0231
4.74	-0.0485		4.75	-0.0267		4.75	-0.0218		4.74	-0.0215		4.74	-0.0231
4.75	-0.0486		4.75	-0.0268		4.75	-0.0218		4.75	-0.0216		4.75	-0.0231
4.76	-0.0488		4.76	-0.0268		4.76	-0.0219		4.76	-0.0216		4.76	-0.0231
4.77	-0.049		4.77	-0.0269		4.77	-0.0219		4.77	-0.0217		4.77	-0.0231
4.78	-0.0491		4.78	-0.0269		4.78	-0.022		4.78	-0.0217		4.78	-0.0232
4.79	-0.0493		4.79	-0.027		4.79	-0.022		4.79	-0.0217		4.79	-0.0231
4.79	-0.0494		4.8	-0.027		4.8	-0.0221		4.79	-0.0218		4.79	-0.0231
4.8	-0.0494		4.8	-0.0271		4.8	-0.0221		4.8	-0.0219		4.8	-0.0232
4.81	-0.0494		4.81	-0.0271		4.81	-0.0221		4.81	-0.0219		4.81	-0.0232
4.82	-0.0495		4.82	-0.0271		4.82	-0.0222		4.82	-0.0219		4.82	-0.0232
4.83	-0.0495		4.83	-0.0271		4.83	-0.0223		4.83	-0.022		4.83	-0.0232
4.84	-0.0495		4.84	-0.0272		4.84	-0.0223		4.84	-0.022		4.84	-0.0232
4.84	-0.0495		4.85	-0.0272		4.85	-0.0224		4.84	-0.022		4.84	-0.0233
4.85	-0.0494		4.85	-0.0273		4.85	-0.0224		4.85	-0.0221		4.85	-0.0233
4.86	-0.0497		4.86	-0.0273		4.86	-0.0224		4.86	-0.0221		4.86	-0.0233
4.87	-0.0499		4.87	-0.0273		4.87	-0.0224		4.87	-0.0222		4.87	-0.0234
4.88	-0.05		4.88	-0.0273		4.88	-0.0224		4.88	-0.0222		4.88	-0.0234
4.89	-0.0501		4.89	-0.0274		4.89	-0.0225		4.89	-0.0223		4.89	-0.0234
4.89	-0.0501		4.9	-0.0274		4.9	-0.0226		4.89	-0.0223		4.89	-0.0234
4.9	-0.0501		4.9	-0.0274		4.9	-0.0226		4.9	-0.0224		4.9	-0.0234
4.91	-0.0504		4.91	-0.0274		4.91	-0.0226		4.91	-0.0224		4.91	-0.0234
4.92	-0.0505		4.92	-0.0275		4.92	-0.0226		4.92	-0.0225		4.92	-0.0234
4.93	-0.0506		4.93	-0.0276		4.93	-0.0226		4.93	-0.0225		4.93	-0.0234
4.94	-0.0506		4.94	-0.0276		4.94	-0.0227		4.94	-0.0226		4.94	-0.0234
4.94	-0.0507		4.95	-0.0276		4.95	-0.0228		4.94	-0.0226		4.94	-0.0235
4.95	-0.0509		4.95	-0.0276		4.95	-0.0228		4.95	-0.0226		4.95	-0.0235
4.96	-0.051		4.96	-0.0277		4.96	-0.0228		4.96	-0.0226		4.96	-0.0235
4.97	-0.0511		4.97	-0.0278		4.97	-0.0229		4.97	-0.0227		4.97	-0.0235
4.98	-0.0513		4.98	-0.0278		4.98	-0.0229		4.98	-0.0227		4.98	-0.0236
4.99	-0.0516		4.99	-0.0278		4.99	-0.0229		4.99	-0.0228		4.99	-0.0236
4.99	-0.052		5	-0.0278		5	-0.023		4.99	-0.0229		4.99	-0.0236
5	-0.0522		5	-0.0279		5	-0.023		5	-0.0229		5	-0.0236
5.01	-0.0524		5.01	-0.0279		5.01	-0.0231		5.01	-0.0229		5.01	-0.0236
5.02	-0.0525		5.02	-0.028		5.02	-0.0231		5.02	-0.023		5.02	-0.0236
5.03	-0.0526		5.03	-0.0281		5.03	-0.0231		5.03	-0.023		5.03	-0.0237
5.04	-0.0528		5.04	-0.0281		5.04	-0.0232		5.04	-0.0231		5.04	-0.0237
5.04	-0.0529		5.05	-0.0282		5.05	-0.0232		5.04	-0.0231		5.04	-0.0237
5.05	-0.053		5.05	-0.0282		5.05	-0.0232		5.05	-0.0232		5.05	-0.0238
5.06	-0.0532		5.06	-0.0283		5.06	-0.0233		5.06	-0.0233		5.06	-0.0238
5.07	-0.0533		5.07	-0.0283		5.07	-0.0233		5.07	-0.0233		5.07	-0.0239
5.08	-0.0534		5.08	-0.0284		5.08	-0.0234		5.08	-0.0233		5.08	-0.0239
5.09	-0.0537		5.09	-0.0284		5.09	-0.0234		5.09	-0.0234		5.09	-0.0239
5.09	-0.0539		5.1	-0.0285		5.1	-0.0234		5.09	-0.0235		5.09	-0.0239
5.1	-0.0541		5.1	-0.0285		5.1	-0.0235		5.1	-0.0235		5.1	-0.0239
5.11	-0.0542		5.11	-0.0286		5.11	-0.0235		5.11	-0.0232		5.11	-0.0239
5.12	-0.0546		5.12	-0.0286		5.12	-0.0236		5.12	-0.0233		5.12	-0.024
5.13	-0.0549		5.13	-0.0287		5.13	-0.0236		5.13	-0.0233		5.13	-0.0241
5.14	-0.0551		5.14	-0.0287		5.14	-0.0236		5.14	-0.0234		5.14	-0.0241
5.14	-0.0554		5.15	-0.0288		5.15	-0.0237		5.14	-0.0234		5.14	-0.0241
5.15	-0.0557		5.15	-0.0288		5.15	-0.0238		5.15	-0.0235		5.15	-0.0241
5.16	-0.056		5.16	-0.0289		5.16	-0.0238		5.16	-0.0235		5.16	-0.0241
5.17	-0.0564		5.17	-0.0289		5.17	-0.0239		5.17	-0.0236		5.17	-0.0242
5.18	-0.0567		5.18	-0.029		5.18	-0.0239		5.18	-0.0236		5.18	-0.0242
5.19	-0.0571		5.19	-0.029		5.19	-0.0239		5.19	-0.0237		5.19	-0.0243
5.19	-0.0574		5.2	-0.0291		5.2	-0.024		5.19	-0.0238		5.19	-0.0243
5.2	-0.0578		5.2	-0.0292		5.2	-0.024		5.2	-0.0238		5.2	-0.0244
5.21	-0.0581		5.21	-0.0293		5.21	-0.0241		5.21	-0.0239		5.21	-0.0244
5.22	-0.0586		5.22	-0.0294		5.22	-0.0241		5.22	-0.024		5.22	-0.0244
5.23	-0.0589		5.23	-0.0294		5.23	-0.0242		5.23	-0.024		5.23	-0.0244
5.24	-0.0594		5.24	-0.0295		5.24	-0.0243		5.24	-0.0241		5.24	-0.0245
5.24	-0.06		5.25	-0.0296		5.25	-0.0243		5.24	-0.0242		5.24	-0.0246
5.25	-0.0606		5.25	-0.0296		5.25	-0.0244		5.25	-0.0243		5.25	-0.0246
5.26	-0.061		5.26	-0.0297		5.26	-0.0245		5.26	-0.0244		5.26	-0.0246
5.27	-0.0616		5.27	-0.0298		5.27	-0.0246		5.27	-0.0245		5.27	-0.0246
5.28	-0.0622		5.28	-0.0299		5.28	-0.0246		5.28	-0.0246		5.28	-0.0247
5.29	-0.0627		5.29	-0.03		5.29	-0.0247		5.29	-0.0246		5.29	-0.0248
5.29	-0.0633		5.3	-0.03		5.3	-0.0248		5.29	-0.0247		5.29	-0.0249
5.3	-0.0638		5.3	-0.0301		5.3	-0.0249		5.3	-0.0249		5.3	-0.0249
5.31	-0.0645		5.31	-0.0302		5.31	-0.0249		5.31	-0.0249		5.31	-0.0249
5.32	-0.065		5.32	-0.0302		5.32	-0.025		5.32	-0.025		5.32	-0.025
5.33	-0.0657		5.33	-0.0303		5.33	-0.0251		5.33	-0.0251		5.33	-0.025
5.34	-0.0662		5.34	-0.0304		5.34	-0.0252		5.34	-0.0253		5.34	-0.0251
5.34	-0.0665		5.35	-0.0305		5.35	-0.0253		5.34	-0.0254		5.34	-0.0251
5.35	-0.067		5.35	-0.0305		5.35	-0.0253		5.35	-0.0254		5.35	-0.0251
5.36	-0.0674		5.36	-0.0306		5.36	-0.0255		5.36	-0.0256		5.36	-0.0252
5.37	-0.0678		5.37	-0.0307		5.37	-0.0256		5.37	-0.0257		5.37	-0.0253
5.38	-0.0683		5.38	-0.0308		5.38	-0.0257		5.38	-0.0258		5.38	-0.0254
5.39	-0.0687		5.39	-0.0305		5.39	-0.0258		5.39	-0.0259		5.39	-0.0254
5.39	-0.0692		5.4	-0.0305		5.4	-0.0259		5.39	-0.026		5.39	-0.0255
5.4	-0.0694		5.4	-0.0306		5.4	-0.026		5.4	-0.0262		5.4	-0.0255
5.41	-0.0694		5.41	-0.0307		5.41	-0.0261		5.41	-0.0262		5.41	-0.0256
5.42	-0.0696		5.42	-0.0308		5.42	-0.0262		5.42	-0.0264		5.42	-0.0256
5.43	-0.0697		5.43	-0.0309		5.43	-0.0263		5.43	-0.0265		5.43	-0.0257
5.44	-0.07		5.44	-0.031		5.44	-0.0264		5.44	-0.0266		5.44	-0.0258
5.44	-0.0699		5.45	-0.0311		5.45	-0.0266		5.44	-0.0267		5.44	-0.0259
5.45	-0.0698		5.45	-0.0312		5.45	-0.0268		5.45	-0.0269		5.45	-0.0259
5.46	-0.0699		5.46	-0.0313		5.46	-0.027		5.46	-0.0271		5.46	-0.026
5.47	-0.0702		5.47	-0.0314		5.47	-0.0271		5.47	-0.0272		5.47	-0.0261
5.48	-0.0702		5.48	-0.0315		5.48	-0.0273		5.48	-0.0273		5.48	-0.0261
5.49	-0.0703		5.49	-0.0316		5.49	-0.0274		5.49	-0.0275		5.49	-0.0262
5.49	-0.0703		5.5	-0.0317		5.5	-0.0275		5.49	-0.0276		5.49	-0.0263
5.5	-0.07		5.5	-0.0318		5.5	-0.0277		5.5	-0.0278		5.5	-0.0264
5.51	-0.0698		5.51	-0.0319		5.51	-0.0279		5.51	-0.028		5.51	-0.0265
5.52	-0.0695		5.52	-0.032		5.52	-0.0281		5.52	-0.0282		5.52	-0.0265
5.53	-0.0694		5.53	-0.0321		5.53	-0.0282		5.53	-0.0283		5.53	-0.0266
5.54	-0.0695		5.54	-0.0322		5.54	-0.0284		5.54	-0.0284		5.54	-0.0267
5.54	-0.0696		5.55	-0.0323		5.55	-0.0286		5.54	-0.0287		5.54	-0.0268
5.55	-0.0693		5.55	-0.0324		5.55	-0.0287		5.55	-0.0288		5.55	-0.0269
5.56	-0.0693		5.56	-0.0326		5.56	-0.0289		5.56	-0.029		5.56	-0.0269
5.57	-0.0693		5.57	-0.0327		5.57	-0.0291		5.57	-0.0293		5.57	-0.027
5.58	-0.0694		5.58	-0.0329		5.58	-0.0293		5.58	-0.0295		5.58	-0.0271
5.59	-0.0695		5.59	-0.0326		5.59	-0.0296		5.59	-0.0297		5.59	-0.0271
5.59	-0.0694		5.6	-0.0327		5.6	-0.0298		5.59	-0.0299		5.59	-0.0273
5.6	-0.0689		5.6	-0.0328		5.6	-0.0301		5.6	-0.0302		5.6	-0.0274
5.61	-0.0684		5.61	-0.0329		5.61	-0.0302		5.61	-0.0304		5.61	-0.0274
5.62	-0.0681		5.62	-0.0331		5.62	-0.0306		5.62	-0.0306		5.62	-0.0275
5.63	-0.0676		5.63	-0.0332		5.63	-0.0308		5.63	-0.0309		5.63	-0.0276
5.64	-0.0673		5.64	-0.0334		5.64	-0.0311		5.64	-0.0311		5.64	-0.0277
5.64	-0.0676		5.65	-0.0335		5.65	-0.0314		5.64	-0.0314		5.64	-0.0279
5.65	-0.0677		5.65	-0.0337		5.65	-0.0316		5.65	-0.0317		5.65	-0.0279
5.66	-0.0682		5.66	-0.0338		5.66	-0.0319		5.66	-0.0317		5.66	-0.0281
5.67	-0.0684		5.67	-0.0339		5.67	-0.0321		5.67	-0.0321		5.67	-0.0281
5.68	-0.0683		5.68	-0.0341		5.68	-0.0325		5.68	-0.0324		5.68	-0.0282
5.69	-0.0677		5.69	-0.0342		5.69	-0.0328		5.69	-0.0327		5.69	-0.0283
5.69	-0.0682		5.7	-0.0344		5.7	-0.0331		5.69	-0.0331		5.69	-0.0284
5.7	-0.0678		5.7	-0.0345		5.7	-0.0334		5.7	-0.0333		5.7	-0.0285
5.71	-0.0679		5.71	-0.0347		5.71	-0.0337		5.71	-0.0337		5.71	-0.0286
5.72	-0.0677		5.72	-0.0349		5.72	-0.0341		5.72	-0.034		5.72	-0.0286
5.73	-0.0677		5.73	-0.0351		5.73	-0.0344		5.73	-0.0343		5.73	-0.0288
5.74	-0.0678		5.74	-0.0352		5.74	-0.0349		5.74	-0.0347		5.74	-0.0289
5.74	-0.0678		5.75	-0.0355		5.75	-0.0352		5.74	-0.035		5.74	-0.029
5.75	-0.0677		5.75	-0.0356		5.75	-0.0355		5.75	-0.0353		5.75	-0.0291
5.76	-0.0677		5.76	-0.0358		5.76	-0.0358		5.76	-0.0356		5.76	-0.0292
5.77	-0.0679		5.77	-0.036		5.77	-0.0363		5.77	-0.0358		5.77	-0.0293
5.78	-0.0679		5.78	-0.0362		5.78	-0.0366		5.78	-0.0362		5.78	-0.0294
5.79	-0.0676		5.79	-0.0364		5.79	-0.037		5.79	-0.0363		5.79	-0.0295
5.79	-0.0677		5.8	-0.0366		5.8	-0.0372		5.79	-0.0366		5.79	-0.0296
5.8	-0.068		5.8	-0.0369		5.8	-0.0375		5.8	-0.0368		5.8	-0.0296
5.81	-0.0683		5.81	-0.0371		5.81	-0.0379		5.81	-0.037		5.81	-0.0298
5.82	-0.0684		5.82	-0.0373		5.82	-0.0382		5.82	-0.0372		5.82	-0.0298
5.83	-0.0686		5.83	-0.0375		5.83	-0.0384		5.83	-0.0374		5.83	-0.0299
5.84	-0.0684		5.84	-0.0378		5.84	-0.0386		5.84	-0.0375		5.84	-0.03
5.84	-0.0684		5.85	-0.038		5.85	-0.0387		5.84	-0.0376		5.84	-0.0301
5.85	-0.0686		5.85	-0.0382		5.85	-0.0388		5.85	-0.0377		5.85	-0.0301
5.86	-0.0687		5.86	-0.0384		5.86	-0.0389		5.86	-0.0377		5.86	-0.0302
5.87	-0.0688		5.87	-0.0387		5.87	-0.039		5.87	-0.0377		5.87	-0.0304
5.88	-0.0688		5.88	-0.0389		5.88	-0.039		5.88	-0.0377		5.88	-0.0304
5.89	-0.0687		5.89	-0.0391		5.89	-0.039		5.89	-0.0377		5.89	-0.0306
5.89	-0.0687		5.9	-0.0394		5.9	-0.039		5.89	-0.0376		5.89	-0.0306
5.9	-0.0686		5.9	-0.0396		5.9	-0.039		5.9	-0.0377		5.9	-0.0307
5.9	-0.0287		5.91	-0.0398		5.91	-0.039		5.91	-0.0377		5.91	-0.0308
5.91	-0.0078		5.92	-0.04		5.92	-0.0389		5.92	-0.0376		5.92	-0.0308
5.92	-0.0057		5.93	-0.0402		5.93	-0.0389		5.93	-0.0375		5.93	-0.0309
5.92	0.039		5.94	-0.0405		5.94	-0.0388		5.94	-0.0375		5.94	-0.031
5.93	0.0417		5.95	-0.0407		5.95	-0.0387		5.94	-0.0374		5.94	-0.031
5.93	0.0429		5.95	-0.0409		5.95	-0.0385		5.95	-0.0373		5.95	-0.0311
5.94	0.0437		5.96	-0.0411		5.96	-0.0385		5.96	-0.0372		5.96	-0.0311
5.95	0.0444		5.97	-0.0412		5.97	-0.0383		5.97	-0.0371		5.97	-0.0311
5.96	0.0449		5.98	-0.0414		5.98	-0.0382		5.98	-0.037		5.98	-0.0312
5.97	0.045		5.99	-0.0416		5.99	-0.0382		5.99	-0.0369		5.99	-0.0313
5.98	0.0452		6	-0.0418		6	-0.0381		5.99	-0.0369		5.99	-0.0314
5.99	0.0453		6	-0.042		6	-0.038		6	-0.0368		6	-0.0314
5.99	0.0453		6.01	-0.0422		6.01	-0.038		6.01	-0.0367		6.01	-0.0314
6	0.0452		6.02	-0.0424		6.02	-0.0379		6.02	-0.0367		6.02	-0.0315
6.01	0.0451		6.03	-0.0136		6.03	-0.0378		6.02	-0.0136		6.03	-0.0315
6.02	0.045		6.04	-0.0053		6.03	-0.0132		6.03	-0.0058		6.04	-0.0316
6.03	0.0449		6.05	-0.0038		6.04	-0.0053		6.04	-0.0044		6.04	-0.0316
6.04	0.0447		6.05	0.0187		6.05	-0.0039		6.04	0.0148		6.05	-0.0316
6.04	0.0446		6.06	0.0287		6.05	0.017		6.04	0.0225		6.05	-0.0089
6.05	0.0444		6.07	0.0291		6.05	0.0261		6.05	0.024		6.06	-0.0037
6.06	0.0415		6.08	0.0288		6.06	0.0275		6.06	0.0243		6.07	-0.0028
6.07	0.0413		6.09	0.0284		6.07	0.0274		6.07	0.0242		6.07	-0.0025
6.08	0.0409		6.1	0.0281		6.08	0.0267		6.08	0.0237		6.08	0.0252
6.08	0.039		6.1	0.0277		6.09	0.0258		6.08	0.0231		6.09	0.0263
6.09	0.0384		6.11	0.0274		6.1	0.025		6.09	0.0226		6.09	0.0265
6.1	0.038		6.12	0.0272		6.1	0.0244		6.1	0.022		6.1	0.0264
6.11	0.0378		6.12	0.027		6.11	0.0239		6.11	0.0215		6.11	0.0262
6.12	0.0381		6.13	0.0269		6.12	0.0234		6.12	0.0212		6.12	0.026
6.12	0.0094		6.14	0.0267		6.13	0.023		6.13	0.0208		6.13	0.0258
6.13	0.0037		6.14	0.0265		6.14	0.0227		6.13	0.0205		6.14	0.0256
6.13	0.0025		6.15	0.0264		6.15	0.0223		6.14	0.0202		6.14	0.0254
6.13	-0.0247		6.15	0.0263		6.15	0.022		6.15	0.0199		6.15	0.0252
6.14	-0.0303		6.16	0.0262		6.16	0.0218		6.16	0.0196		6.16	0.0251
6.15	-0.033		6.17	0.026		6.17	0.0215		6.17	0.0194		6.17	0.025
6.16	-0.0351		6.18	0.0259		6.18	0.0213		6.18	0.0192		6.18	0.0249
6.17	-0.037		6.19	0.0258		6.19	0.021		6.18	0.019		6.19	0.0248
6.18	-0.0388		6.2	0.0257		6.2	0.0209		6.19	0.0188		6.19	0.0247
6.18	-0.0406		6.2	0.0257		6.2	0.0206		6.2	0.0187		6.2	0.0246
6.19	-0.0441		6.21	0.0256		6.21	0.0205		6.21	0.0185		6.21	0.0246
6.2	-0.0466		6.22	0.0255		6.22	0.0203		6.22	0.0183		6.22	0.0245
6.21	-0.0492		6.23	0.0254		6.23	0.0202		6.23	0.0182		6.23	0.0245
6.22	-0.0518		6.24	0.0254		6.24	0.0201		6.24	0.0181		6.24	0.0244
6.23	-0.0554		6.25	0.0077		6.25	0.0199		6.24	0.0067		6.24	0.0244
6.23	-0.0599		6.25	0.0023		6.25	0.0062		6.24	0.0027		6.25	0.0243
6.24	-0.0675		6.26	0.0014		6.25	0.0021		6.25	0.0019		6.26	0.0242
6.25	-0.0758		6.27	0.0009		6.26	0.0014		6.25	-0.0084		6.27	0.0242
6.26	-0.1096		6.28	-0.021		6.26	-0.0112		6.26	-0.0128		6.27	0.0066
6.27	-0.118		6.29	-0.0228		6.27	-0.0163		6.27	-0.0145		6.28	0.002
6.28	-0.1221		6.3	-0.0239		6.28	-0.0181		6.28	-0.0157		6.29	0.0014
6.28	-0.1238		6.3	-0.0247		6.29	-0.0192		6.29	-0.0167		6.29	0.001
6.29	-0.1226		6.31	-0.0253		6.3	-0.0202		6.29	-0.0176		6.29	-0.0192
6.3	-0.1241		6.32	-0.0259		6.3	-0.021		6.3	-0.0184		6.3	-0.0208
6.31	-0.1246		6.33	-0.0265		6.31	-0.0219		6.31	-0.0192		6.31	-0.0219
6.32	-0.1244		6.34	-0.0271		6.32	-0.0227		6.32	-0.02		6.32	-0.0227
6.33	-0.1248		6.34	-0.0278		6.33	-0.0235		6.33	-0.0209		6.33	-0.0234
6.33	-0.125		6.35	-0.0285		6.34	-0.0243		6.33	-0.0217		6.34	-0.0241
6.33	-0.0179		6.35	-0.0292		6.35	-0.0251		6.34	-0.0225		6.34	-0.0246
6.34	-0.0072		6.35	-0.0299		6.35	-0.0259		6.35	-0.0233		6.35	-0.0251
6.35	-0.0052		6.36	-0.0307		6.36	-0.0266		6.36	-0.0241		6.36	-0.0256
6.35	0.09		6.37	-0.0315		6.37	-0.0274		6.37	-0.025		6.37	-0.0261
6.36	0.0543		6.38	-0.0324		6.38	-0.0283		6.38	-0.026		6.38	-0.0265
6.37	0.0414		6.39	-0.0333		6.39	-0.0293		6.38	-0.0273		6.39	-0.0269
6.38	0.0414		6.4	-0.0343		6.4	-0.0303		6.39	-0.0289		6.39	-0.0274
6.38	0.0418		6.4	-0.0354		6.4	-0.0316		6.4	-0.0306		6.4	-0.0278
6.39	0.0418		6.41	-0.0364		6.41	-0.0334		6.41	-0.0327		6.41	-0.0284
6.4	0.0419		6.42	-0.0375		6.42	-0.0353		6.42	-0.0346		6.42	-0.0289
6.41	0.0418		6.43	-0.0384		6.43	-0.0371		6.43	-0.0362		6.43	-0.0294
6.42	0.0416		6.44	-0.0394		6.44	-0.0386		6.43	-0.0371		6.44	-0.0301
6.43	0.0415		6.45	-0.0403		6.45	-0.0397		6.44	-0.0377		6.44	-0.0307
6.43	0.0413		6.45	-0.0412		6.45	-0.0403		6.45	-0.038		6.45	-0.0314
6.44	0.041		6.46	-0.014		6.46	-0.0406		6.45	-0.0131		6.46	-0.0319
6.45	0.0406		6.47	-0.0048		6.46	-0.013		6.46	-0.0052		6.47	-0.0326
6.46	0.0394		6.48	-0.0035		6.47	-0.0047		6.47	-0.0039		6.48	-0.033
6.47	0.0387		6.49	-0.0029		6.48	-0.0034		6.47	0.0172		6.49	-0.0334
6.48	0.0382		6.5	0.029		6.48	0.0206		6.48	0.024		6.49	-0.0099
6.48	0.0378		6.5	0.0295		6.49	0.0292		6.49	0.0245		6.49	-0.0034
6.49	0.0372		6.51	0.0295		6.5	0.0289		6.49	0.0243		6.5	-0.0024
6.5	0.0367		6.52	0.0292		6.5	0.0279		6.5	0.0238		6.5	-0.002
6.51	0.0363		6.53	0.0289		6.51	0.0272		6.51	0.0233		6.51	0.0258
6.52	0.0361		6.54	0.0286		6.52	0.0265		6.52	0.0229		6.52	0.0264
6.53	0.0359		6.55	0.0284		6.53	0.0259		6.53	0.0225		6.53	0.0264
6.53	0.0352		6.55	0.0282		6.54	0.0254		6.54	0.0221		6.54	0.0261
6.54	0.0349		6.55	0.028		6.55	0.0249		6.54	0.0217		6.54	0.0259
6.55	0.0346		6.56	0.0278		6.55	0.0245		6.55	0.0214		6.55	0.0256
6.55	0.0098		6.57	0.0276		6.56	0.0241		6.56	0.0211		6.56	0.0254
6.56	0.0038		6.57	0.0275		6.57	0.0238		6.57	0.0208		6.57	0.0254
6.57	0.0026		6.58	0.0273		6.58	0.0235		6.58	0.0205		6.58	0.0252
6.57	0.0022		6.59	0.0272		6.59	0.0232		6.58	0.0203		6.59	0.0251
6.58	-0.0263		6.6	0.0271		6.6	0.023		6.59	0.02		6.59	0.0251
6.58	-0.0295		6.6	0.027		6.6	0.0227		6.6	0.0198		6.6	0.025
6.59	-0.0317		6.61	0.0269		6.61	0.0225		6.61	0.0196		6.61	0.0249
6.6	-0.0336		6.62	0.0269		6.62	0.0223		6.62	0.0194		6.62	0.0249
6.61	-0.0352		6.63	0.0268		6.63	0.0221		6.63	0.0193		6.63	0.0249
6.62	-0.0368		6.64	0.0267		6.64	0.0219		6.63	0.0192		6.64	0.0248
6.63	-0.0382		6.65	0.0267		6.65	0.0218		6.64	0.019		6.64	0.0248
6.63	-0.0397		6.65	0.0266		6.65	0.0216		6.65	0.0189		6.65	0.0247
6.64	-0.0411		6.66	0.0266		6.66	0.0215		6.66	0.0187		6.66	0.0246
6.65	-0.0427		6.67	0.0265		6.67	0.0214		6.67	0.0187		6.67	0.0246
6.66	-0.0444		6.68	0.0086		6.68	0.0212		6.67	0.007		6.68	0.0246
6.67	-0.0467		6.69	0.0024		6.68	0.0065		6.68	0.0028		6.69	0.0245
6.68	-0.0494		6.7	0.0015		6.69	0.0021		6.68	0.002		6.69	0.0245
6.68	-0.0521		6.7	-0.016		6.7	0.0014		6.68	-0.0085		6.7	0.0244
6.69	-0.0557		6.71	-0.0215		6.7	-0.0122		6.69	-0.0129		6.7	0.0059
6.7	-0.0589		6.72	-0.0233		6.7	-0.017		6.7	-0.0146		6.71	0.0021
6.71	-0.0618		6.73	-0.0243		6.71	-0.0188		6.71	-0.0158		6.72	0.0014
6.72	-0.0645		6.74	-0.0251		6.72	-0.0198		6.72	-0.0168		6.72	-0.0153
6.73	-0.0679		6.75	-0.0257		6.73	-0.0207		6.73	-0.0177		6.73	-0.0194
6.73	-0.0698		6.75	-0.0264		6.74	-0.0215		6.74	-0.0185		6.74	-0.021
6.74	-0.0709		6.76	-0.0269		6.75	-0.0223		6.74	-0.0192		6.74	-0.022
6.75	-0.0721		6.77	-0.0275		6.75	-0.0231		6.75	-0.02		6.75	-0.0228
6.76	-0.0722		6.77	-0.0281		6.76	-0.0238		6.76	-0.0207		6.76	-0.0235
6.77	-0.0725		6.78	-0.0288		6.77	-0.0246		6.77	-0.0215		6.77	-0.0241
6.77	-0.0174		6.79	-0.0294		6.78	-0.0253		6.78	-0.0222		6.78	-0.0247
6.78	-0.0068		6.79	-0.03		6.79	-0.0261		6.79	-0.0229		6.79	-0.0252
6.78	-0.0048		6.8	-0.0307		6.8	-0.0268		6.79	-0.0236		6.79	-0.0256
6.78	0.0454		6.8	-0.0315		6.8	-0.0274		6.8	-0.0243		6.8	-0.0261
6.79	0.0395		6.81	-0.0322		6.81	-0.0282		6.81	-0.0251		6.81	-0.0265
6.8	0.0403		6.82	-0.033		6.82	-0.029		6.82	-0.026		6.82	-0.0269
6.81	0.0406		6.83	-0.0339		6.83	-0.0298		6.83	-0.0271		6.83	-0.0272
6.82	0.0408		6.84	-0.0348		6.84	-0.0308		6.83	-0.0283		6.84	-0.0276
6.83	0.0409		6.85	-0.0358		6.85	-0.0319		6.84	-0.0299		6.84	-0.028
6.83	0.0408		6.85	-0.0369		6.85	-0.0333		6.85	-0.0317		6.85	-0.0284
6.84	0.0406		6.86	-0.038		6.86	-0.0349		6.86	-0.0339		6.86	-0.0288
6.85	0.0402		6.87	-0.039		6.87	-0.0367		6.87	-0.0358		6.87	-0.0293
6.86	0.0397		6.88	-0.04		6.88	-0.0387		6.88	-0.0374		6.88	-0.0298
6.87	0.0394		6.89	-0.041		6.89	-0.0403		6.88	-0.0383		6.89	-0.0304
6.88	0.0392		6.9	-0.0145		6.9	-0.0414		6.88	-0.013		6.89	-0.0311
6.88	0.039		6.9	-0.0048		6.9	-0.0127		6.89	-0.0048		6.9	-0.032
6.89	0.0387		6.91	-0.0034		6.9	-0.0044		6.9	-0.0035		6.91	-0.0329
6.9	0.0387		6.92	-0.003		6.91	-0.0031		6.9	0.0183		6.92	-0.0336
6.91	0.0383		6.93	0.0298		6.91	0.0221		6.91	0.0246		6.92	-0.0086
6.92	0.0381		6.94	0.0305		6.92	0.0298		6.92	0.0247		6.93	-0.0031
6.93	0.0378		6.95	0.0304		6.93	0.0293		6.93	0.0243		6.94	-0.0022
6.93	0.0377		6.95	0.0302		6.94	0.0286		6.93	0.0241		6.94	-0.0019
6.94	0.0373		6.96	0.03		6.95	0.0279		6.94	0.0237		6.94	0.0257
6.95	0.0369		6.97	0.0298		6.95	0.0273		6.95	0.0234		6.95	0.0262
6.96	0.0365		6.98	0.0296		6.96	0.0268		6.96	0.0231		6.96	0.026
6.97	0.036		6.99	0.0294		6.97	0.0263		6.97	0.0227		6.97	0.0258
6.98	0.0356		6.99	0.0292		6.98	0.026		6.98	0.0224		6.98	0.0256
6.98	0.0353		7	0.0291		6.99	0.0256		6.99	0.0221		6.99	0.0254
6.98	0.0097		7	0.0289		7	0.0252		6.99	0.0218		6.99	0.0252
6.99	0.0038		7	0.0288		7	0.0249		7	0.0216		7	0.0251
7	0.0026		7.01	0.0287		7.01	0.0246		7.01	0.0213		7.01	0.0251
7	-0.0206		7.02	0.0286		7.02	0.0244		7.02	0.0211		7.02	0.0251
7.01	-0.027		7.03	0.0285		7.03	0.0242		7.03	0.0209		7.03	0.025
7.02	-0.0295		7.04	0.0284		7.04	0.024		7.04	0.0207		7.04	0.025
7.03	-0.0314		7.05	0.0283		7.05	0.0238		7.04	0.0204		7.04	0.0249
7.03	-0.033		7.05	0.0283		7.05	0.0236		7.05	0.0203		7.05	0.0249
7.04	-0.0344		7.06	0.0282		7.06	0.0234		7.06	0.0202		7.06	0.0249
7.05	-0.0357		7.07	0.0281		7.07	0.0232		7.07	0.02		7.07	0.0249
7.06	-0.0369		7.08	0.0281		7.08	0.0231		7.08	0.0199		7.08	0.0248
7.07	-0.0382		7.09	0.0281		7.09	0.023		7.08	0.0197		7.09	0.0248
7.08	-0.0395		7.1	0.028		7.1	0.0228		7.09	0.0196		7.09	0.0248
7.08	-0.0407		7.1	0.0279		7.1	0.0227		7.1	0.0195		7.1	0.0247
7.09	-0.0424		7.11	0.0085		7.11	0.0226		7.1	0.0075		7.11	0.0247
7.1	-0.044		7.12	0.0026		7.11	0.0067		7.11	0.0029		7.12	0.0247
7.11	-0.0455		7.13	0.0016		7.12	0.0022		7.12	0.0021		7.13	0.0246
7.12	-0.0476		7.14	0.0011		7.13	0.0014		7.12	-0.0087		7.14	0.0246
7.13	-0.0501		7.15	-0.0222		7.13	-0.0132		7.13	-0.0131		7.14	0.0061
7.13	-0.0532		7.15	-0.024		7.14	-0.0181		7.13	-0.0149		7.14	0.0021
7.14	-0.0566		7.16	-0.0252		7.15	-0.0198		7.14	-0.0161		7.15	0.0014
7.15	-0.06		7.17	-0.026		7.15	-0.0209		7.15	-0.0171		7.15	0.0011
7.16	-0.0638		7.18	-0.0266		7.16	-0.0218		7.16	-0.018		7.16	-0.0196
7.17	-0.0665		7.19	-0.0273		7.17	-0.0226		7.17	-0.0188		7.17	-0.0211
7.18	-0.0676		7.2	-0.0279		7.18	-0.0234		7.18	-0.0196		7.18	-0.0221
7.18	-0.0682		7.2	-0.0285		7.19	-0.0242		7.18	-0.0204		7.19	-0.0229
7.19	-0.0685		7.2	-0.029		7.2	-0.0249		7.19	-0.0212		7.19	-0.0236
7.2	-0.0691		7.21	-0.0296		7.2	-0.0257		7.2	-0.0219		7.2	-0.0242
7.2	-0.0172		7.22	-0.0302		7.21	-0.0264		7.21	-0.0226		7.21	-0.0248
7.21	-0.0065		7.22	-0.0308		7.22	-0.0271		7.22	-0.0233		7.22	-0.0254
7.22	-0.0045		7.23	-0.0315		7.23	-0.0278		7.23	-0.0239		7.23	-0.0258
7.22	0.0437		7.24	-0.0322		7.24	-0.0284		7.24	-0.0246		7.24	-0.0262
7.23	0.042		7.25	-0.033		7.25	-0.0291		7.24	-0.0253		7.24	-0.0266
7.23	0.0419		7.25	-0.0338		7.25	-0.0299		7.25	-0.0261		7.25	-0.0269
7.24	0.0421		7.26	-0.0347		7.26	-0.0306		7.26	-0.0271		7.26	-0.0272
7.25	0.0421		7.27	-0.0357		7.27	-0.0315		7.27	-0.0283		7.27	-0.0276
7.26	0.0424		7.28	-0.0366		7.28	-0.0326		7.28	-0.0297		7.28	-0.028
7.27	0.0422		7.29	-0.0377		7.29	-0.0338		7.29	-0.0315		7.29	-0.0284
7.28	0.042		7.3	-0.0388		7.3	-0.0353		7.29	-0.0336		7.29	-0.0287
7.28	0.0417		7.3	-0.0399		7.3	-0.0371		7.3	-0.0358		7.3	-0.0291
7.29	0.0413		7.31	-0.041		7.31	-0.039		7.31	-0.0378		7.31	-0.0296
7.3	0.0409		7.32	-0.042		7.32	-0.0409		7.32	-0.0392		7.32	-0.0302
7.31	0.0404		7.33	-0.0218		7.33	-0.0423		7.32	-0.0131		7.33	-0.0309
7.32	0.0398		7.34	-0.0047		7.33	-0.0125		7.33	-0.0048		7.34	-0.0317
7.33	0.0394		7.35	-0.0034		7.34	-0.0043		7.33	-0.0035		7.34	-0.0328
7.33	0.0389		7.35	0.0214		7.35	-0.003		7.33	0.0194		7.35	-0.0337
7.34	0.0386		7.36	0.0308		7.35	0.0234		7.34	0.0252		7.35	-0.0086
7.35	0.0383		7.37	0.0315		7.35	0.0309		7.35	0.0252		7.36	-0.0031
7.36	0.038		7.38	0.0315		7.36	0.0305		7.36	0.025		7.37	-0.0021
7.37	0.0376		7.39	0.0314		7.37	0.0299		7.37	0.0248		7.37	-0.0019
7.38	0.0373		7.4	0.0312		7.38	0.0294		7.38	0.0245		7.38	0.0259
7.38	0.0369		7.4	0.0311		7.39	0.0287		7.38	0.0242		7.39	0.0261
7.39	0.0367		7.41	0.0309		7.4	0.0283		7.39	0.0239		7.39	0.026
7.4	0.0364		7.42	0.0307		7.4	0.0279		7.4	0.0236		7.4	0.0257
7.41	0.0361		7.42	0.0306		7.41	0.0275		7.41	0.0233		7.41	0.0256
7.42	0.0355		7.43	0.0305		7.42	0.0271		7.42	0.023		7.42	0.0254
7.42	0.01		7.44	0.0303		7.43	0.0267		7.43	0.0228		7.43	0.0253
7.43	0.0039		7.44	0.0302		7.44	0.0264		7.43	0.0225		7.44	0.0252
7.43	0.0027		7.45	0.0301		7.45	0.0261		7.44	0.0223		7.44	0.0252
7.43	-0.0204		7.45	0.03		7.45	0.0259		7.45	0.022		7.45	0.0251
7.44	-0.0267		7.46	0.0299		7.46	0.0256		7.46	0.0218		7.46	0.0251
7.45	-0.0293		7.47	0.0298		7.47	0.0254		7.47	0.0216		7.47	0.0251
7.46	-0.0312		7.48	0.0297		7.48	0.0252		7.48	0.0215		7.48	0.0251
7.47	-0.0331		7.49	0.0297		7.49	0.025		7.49	0.0213		7.49	0.0251
7.48	-0.0345		7.5	0.0296		7.5	0.0248		7.49	0.0212		7.49	0.025
7.48	-0.0357		7.5	0.0296		7.5	0.0246		7.5	0.0211		7.5	0.025
7.49	-0.0369		7.51	0.0295		7.51	0.0245		7.51	0.021		7.51	0.025
7.5	-0.0378		7.52	0.0295		7.52	0.0244		7.52	0.0209		7.52	0.025
7.51	-0.0389		7.53	0.0294		7.53	0.0242		7.53	0.0207		7.53	0.0249
7.52	-0.0398		7.54	0.0292		7.54	0.0241		7.54	0.0207		7.54	0.0249
7.53	-0.0409		7.55	0.009		7.55	0.024		7.54	0.008		7.54	0.0249
7.53	-0.0422		7.55	0.0027		7.55	0.007		7.54	0.003		7.55	0.0249
7.54	-0.0437		7.56	0.0016		7.55	0.0023		7.55	0.0022		7.56	0.0249
7.55	-0.0455		7.57	0.0011		7.56	0.0015		7.55	-0.0092		7.57	0.0249
7.56	-0.0477		7.58	-0.0226		7.56	-0.0141		7.56	-0.0134		7.57	0.0068
7.57	-0.0503		7.59	-0.0246		7.57	-0.0192		7.57	-0.0152		7.58	0.0023
7.58	-0.0532		7.6	-0.0259		7.58	-0.0213		7.58	-0.0165		7.59	0.0015
7.58	-0.0566		7.6	-0.0267		7.59	-0.0224		7.58	-0.0176		7.59	0.0011
7.59	-0.0607		7.61	-0.0274		7.6	-0.0233		7.59	-0.0185		7.59	-0.0199
7.6	-0.0646		7.62	-0.0281		7.6	-0.0241		7.6	-0.0193		7.6	-0.0214
7.61	-0.0682		7.63	-0.0286		7.61	-0.0249		7.61	-0.0202		7.61	-0.0224
7.62	-0.0705		7.64	-0.0292		7.62	-0.0257		7.62	-0.021		7.62	-0.0231
7.63	-0.0714		7.64	-0.0298		7.63	-0.0265		7.63	-0.0217		7.63	-0.0238
7.63	-0.0721		7.65	-0.0304		7.64	-0.0271		7.63	-0.0224		7.64	-0.0244
7.63	-0.0292		7.65	-0.031		7.65	-0.0279		7.64	-0.0231		7.64	-0.025
7.64	-0.0063		7.65	-0.0316		7.65	-0.0285		7.65	-0.0238		7.65	-0.0256
7.65	-0.0043		7.66	-0.0322		7.66	-0.0292		7.66	-0.0245		7.66	-0.026
7.65	0.0477		7.67	-0.0329		7.67	-0.0299		7.67	-0.0252		7.67	-0.0264
7.66	0.0412		7.68	-0.0336		7.68	-0.0305		7.68	-0.0259		7.68	-0.0268
7.67	0.0424		7.69	-0.0344		7.69	-0.0312		7.68	-0.0268		7.69	-0.0271
7.68	0.0431		7.7	-0.0352		7.7	-0.032		7.69	-0.0277		7.69	-0.0274
7.68	0.0431		7.7	-0.0361		7.7	-0.0329		7.7	-0.0288		7.7	-0.0278
7.69	0.0414		7.71	-0.037		7.71	-0.034		7.71	-0.0303		7.71	-0.0281
7.7	0.0414		7.72	-0.038		7.72	-0.0351		7.72	-0.0319		7.72	-0.0284
7.71	0.0408		7.73	-0.0389		7.73	-0.0366		7.73	-0.034		7.73	-0.0288
7.72	0.0405		7.74	-0.04		7.74	-0.0383		7.74	-0.0363		7.74	-0.0292
7.73	0.0402		7.75	-0.0409		7.75	-0.0403		7.74	-0.0385		7.74	-0.0296
7.73	0.0399		7.75	-0.0418		7.75	-0.0423		7.75	-0.0401		7.75	-0.0301
7.74	0.0393		7.76	-0.0136		7.76	-0.0439		7.75	-0.013		7.76	-0.0309
7.75	0.0388		7.77	-0.005		7.76	-0.0128		7.76	-0.0048		7.77	-0.0317
7.76	0.0384		7.78	-0.0038		7.77	-0.0042		7.77	-0.0035		7.78	-0.0327
7.77	0.038		7.79	-0.0033		7.78	-0.003		7.77	0.02		7.79	-0.0338
7.78	0.0377		7.8	0.0312		7.78	0.025		7.78	0.0257		7.79	-0.0096
7.78	0.0373		7.8	0.0323		7.79	0.0325		7.79	0.0258		7.79	-0.0031
7.79	0.037		7.81	0.0326		7.8	0.0323		7.79	0.0257		7.8	-0.0021
7.8	0.0366		7.82	0.0326		7.8	0.0317		7.8	0.0255		7.8	-0.0018
7.81	0.0364		7.83	0.0327		7.81	0.0311		7.81	0.0253		7.81	0.0259
7.82	0.036		7.84	0.0327		7.82	0.0306		7.82	0.025		7.82	0.0261
7.83	0.0359		7.85	0.0326		7.83	0.0301		7.83	0.0248		7.83	0.0259
7.83	0.0355		7.85	0.0326		7.84	0.0297		7.83	0.0245		7.84	0.0257
7.84	0.0353		7.85	0.0325		7.85	0.0293		7.84	0.0243		7.84	0.0255
7.85	0.0351		7.86	0.0324		7.85	0.0289		7.85	0.0241		7.85	0.0254
7.85	0.0104		7.87	0.0324		7.86	0.0286		7.86	0.0238		7.86	0.0253
7.86	0.004		7.87	0.0323		7.87	0.0283		7.87	0.0236		7.87	0.0252
7.87	0.0027		7.88	0.0322		7.88	0.028		7.88	0.0235		7.88	0.0251
7.87	0.0022		7.89	0.0321		7.89	0.0277		7.88	0.0233		7.89	0.0251
7.88	-0.0261		7.9	0.0321		7.9	0.0275		7.89	0.0231		7.89	0.0251
7.88	-0.0286		7.9	0.032		7.9	0.0271		7.9	0.023		7.9	0.0251
7.89	-0.0304		7.91	0.032		7.91	0.027		7.91	0.0228		7.91	0.025
7.9	-0.0321		7.92	0.0319		7.92	0.0267		7.92	0.0227		7.92	0.025
7.91	-0.0335		7.93	0.0318		7.93	0.0266		7.93	0.0226		7.93	0.025
7.92	-0.0346		7.94	0.0317		7.94	0.0264		7.93	0.0224		7.94	0.025
7.93	-0.0356		7.95	0.0317		7.95	0.0263		7.94	0.0223		7.94	0.025
7.93	-0.0368		7.95	0.0316		7.95	0.0262		7.95	0.0222		7.95	0.0249
7.94	-0.0378		7.96	0.0315		7.96	0.0261		7.96	0.0221		7.96	0.0249
7.95	-0.039		7.97	0.0315		7.97	0.026		7.97	0.022		7.97	0.0249
7.96	-0.0403		7.98	0.0104		7.98	0.0259		7.97	0.0086		7.98	0.0249
7.97	-0.0417		7.99	0.0027		7.98	0.0075		7.98	0.0032		7.99	0.0249
7.98	-0.0433		8	0.0017		7.99	0.0024		7.99	0.0022		7.99	0.0249
7.98	-0.0451		8	0.0012		8	0.0015		7.99	-0.0093		8	0.0249
7.99	-0.047		8.01	-0.0243		8	-0.0154		7.99	-0.0137		8	0.0061
8	-0.0492		8.02	-0.0262		8	-0.0202		8	-0.0156		8.01	0.0023
8.01	-0.0522		8.03	-0.0275		8.01	-0.0219		8.01	-0.017		8.02	0.0015
8.02	-0.056		8.04	-0.0284		8.02	-0.023		8.02	-0.0182		8.02	0.0011
8.03	-0.0604		8.05	-0.0291		8.03	-0.0239		8.03	-0.0191		8.03	-0.0199
8.03	-0.0653		8.05	-0.0298		8.04	-0.0247		8.04	-0.02		8.04	-0.0213
8.04	-0.069		8.06	-0.0303		8.05	-0.0255		8.04	-0.0209		8.04	-0.0223
8.05	-0.0734		8.07	-0.031		8.05	-0.0262		8.05	-0.0217		8.05	-0.0231
8.06	-0.0769		8.07	-0.0315		8.06	-0.027		8.06	-0.0224		8.06	-0.0237
8.07	-0.0791		8.08	-0.0322		8.07	-0.0278		8.07	-0.0232		8.07	-0.0244
8.07	-0.0176		8.09	-0.0328		8.08	-0.0285		8.08	-0.0238		8.08	-0.0249
8.08	-0.0062		8.09	-0.0334		8.09	-0.0292		8.09	-0.0245		8.09	-0.0254
8.08	-0.0042		8.1	-0.034		8.1	-0.0298		8.09	-0.0251		8.09	-0.0259
8.08	-0.0038		8.1	-0.0347		8.1	-0.0305		8.1	-0.0258		8.1	-0.0264
8.09	0.0429		8.11	-0.0354		8.11	-0.0312		8.11	-0.0265		8.11	-0.0267
8.1	0.0424		8.12	-0.0362		8.12	-0.0319		8.12	-0.0273		8.12	-0.027
8.11	0.0417		8.13	-0.037		8.13	-0.0327		8.13	-0.0282		8.13	-0.0274
8.12	0.0415		8.14	-0.0379		8.14	-0.0335		8.13	-0.0293		8.14	-0.0277
8.13	0.041		8.15	-0.0388		8.15	-0.0345		8.14	-0.0306		8.14	-0.028
8.13	0.0404		8.15	-0.0398		8.15	-0.0357		8.15	-0.0323		8.15	-0.0283
8.14	0.04		8.16	-0.0407		8.16	-0.0371		8.16	-0.0343		8.16	-0.0286
8.15	0.0395		8.17	-0.0416		8.17	-0.0388		8.17	-0.0367		8.17	-0.0291
8.16	0.0391		8.18	-0.0425		8.18	-0.0408		8.18	-0.0391		8.18	-0.0295
8.17	0.0389		8.19	-0.0433		8.19	-0.0429		8.19	-0.0408		8.19	-0.03
8.18	0.0386		8.2	-0.0146		8.2	-0.0447		8.19	-0.0132		8.19	-0.0306
8.18	0.0383		8.2	-0.0048		8.2	-0.0128		8.19	-0.0047		8.2	-0.0315
8.19	0.0383		8.21	-0.0036		8.2	-0.0041		8.2	-0.0034		8.21	-0.0326
8.2	0.0381		8.22	-0.0032		8.21	-0.0028		8.2	0.0205		8.22	-0.0337
8.21	0.0377		8.23	0.0322		8.21	0.0256		8.21	0.0259		8.22	-0.0081
8.22	0.0375		8.24	0.0333		8.22	0.0329		8.22	0.0261		8.23	-0.003
8.23	0.0372		8.25	0.0336		8.23	0.0328		8.23	0.0261		8.24	-0.0021
8.23	0.0369		8.25	0.0336		8.24	0.0325		8.23	0.026		8.24	0.0209
8.24	0.0365		8.26	0.0337		8.25	0.0321		8.24	0.0258		8.24	0.0258
8.25	0.0363		8.27	0.0337		8.25	0.0316		8.25	0.0256		8.25	0.0261
8.26	0.0359		8.28	0.0337		8.26	0.0311		8.26	0.0255		8.26	0.0259
8.27	0.0357		8.29	0.0337		8.27	0.0307		8.27	0.0253		8.27	0.0257
8.28	0.0354		8.29	0.0337		8.28	0.0303		8.28	0.0251		8.28	0.0255
8.28	0.0351		8.3	0.0336		8.29	0.0299		8.29	0.025		8.29	0.0254
8.28	0.0109		8.3	0.0336		8.3	0.0297		8.29	0.0248		8.29	0.0253
8.29	0.0039		8.3	0.0336		8.3	0.0294		8.3	0.0246		8.3	0.0252
8.3	0.0026		8.31	0.0336		8.31	0.0293		8.31	0.0245		8.31	0.0251
8.3	0.0022		8.32	0.0335		8.32	0.029		8.32	0.0243		8.32	0.0251
8.31	-0.0258		8.33	0.0334		8.33	0.0288		8.33	0.0242		8.33	0.0251
8.32	-0.0284		8.34	0.0334		8.34	0.0287		8.34	0.0241		8.34	0.0251
8.33	-0.0302		8.35	0.0333		8.35	0.0286		8.34	0.0239		8.34	0.0251
8.33	-0.0317		8.35	0.0332		8.35	0.0285		8.35	0.0237		8.35	0.0251
8.34	-0.033		8.36	0.0332		8.36	0.0284		8.36	0.0236		8.36	0.0251
8.35	-0.0344		8.37	0.0331		8.37	0.0283		8.37	0.0235		8.37	0.025
8.36	-0.0355		8.38	0.033		8.38	0.0282		8.38	0.0233		8.38	0.025
8.37	-0.0365		8.39	0.0329		8.39	0.028		8.38	0.0232		8.39	0.025
8.38	-0.0374		8.4	0.0329		8.4	0.0279		8.39	0.0231		8.39	0.025
8.38	-0.039		8.4	0.0328		8.4	0.0278		8.4	0.023		8.4	0.025
8.39	-0.0401		8.41	0.0096		8.41	0.0278		8.4	0.0092		8.41	0.025
8.4	-0.0413		8.42	0.0029		8.41	0.0079		8.41	0.0033		8.42	0.025
8.41	-0.0426		8.43	0.0018		8.42	0.0025		8.42	0.0024		8.43	0.025
8.42	-0.0444		8.44	-0.0184		8.43	0.0016		8.42	-0.0096		8.44	0.025
8.43	-0.0466		8.45	-0.025		8.43	-0.0166		8.43	-0.014		8.44	0.0062
8.43	-0.0491		8.45	-0.0271		8.44	-0.0212		8.44	-0.016		8.44	0.0023
8.44	-0.0526		8.46	-0.0283		8.45	-0.023		8.44	-0.0175		8.45	0.0016
8.45	-0.0578		8.47	-0.0293		8.45	-0.0242		8.45	-0.0188		8.45	0.0011
8.46	-0.0623		8.48	-0.0301		8.46	-0.0252		8.46	-0.0197		8.46	-0.0199
8.47	-0.0663		8.49	-0.0307		8.47	-0.0261		8.47	-0.0207		8.47	-0.0214
8.48	-0.0699		8.5	-0.0312		8.48	-0.0269		8.48	-0.0216		8.48	-0.0224
8.48	-0.0732		8.5	-0.0318		8.49	-0.0277		8.48	-0.0224		8.49	-0.0231
8.49	-0.0759		8.5	-0.0324		8.5	-0.0285		8.49	-0.0231		8.49	-0.0239
8.5	-0.0765		8.51	-0.033		8.5	-0.0292		8.5	-0.0239		8.5	-0.0245
8.5	-0.0176		8.52	-0.0336		8.51	-0.0299		8.51	-0.0246		8.51	-0.0251
8.51	-0.0058		8.52	-0.0342		8.52	-0.0307		8.52	-0.0252		8.52	-0.0256
8.52	-0.004		8.53	-0.0349		8.53	-0.0313		8.53	-0.0259		8.53	-0.0261
8.52	-0.0036		8.54	-0.0356		8.54	-0.0319		8.54	-0.0265		8.54	-0.0265
8.53	0.0434		8.55	-0.0363		8.55	-0.0326		8.54	-0.0272		8.54	-0.0269
8.53	0.0446		8.55	-0.037		8.55	-0.0333		8.55	-0.0279		8.55	-0.0272
8.54	0.0425		8.56	-0.0379		8.56	-0.034		8.56	-0.0289		8.56	-0.0275
8.55	0.042		8.57	-0.0388		8.57	-0.0348		8.57	-0.0299		8.57	-0.0279
8.56	0.0417		8.58	-0.0397		8.58	-0.0358		8.58	-0.0312		8.58	-0.0281
8.57	0.0411		8.59	-0.0407		8.59	-0.037		8.59	-0.0328		8.59	-0.0285
8.58	0.0408		8.6	-0.0416		8.6	-0.0383		8.59	-0.0349		8.59	-0.0289
8.58	0.0404		8.6	-0.0425		8.6	-0.04		8.6	-0.0375		8.6	-0.0292
8.59	0.0401		8.61	-0.0434		8.61	-0.042		8.61	-0.0399		8.61	-0.0296
8.6	0.0399		8.62	-0.0441		8.62	-0.0442		8.62	-0.0419		8.62	-0.0302
8.61	0.0397		8.63	-0.0153		8.63	-0.0462		8.62	-0.0135		8.63	-0.0309
8.62	0.0397		8.64	-0.0048		8.63	-0.0129		8.63	-0.0047		8.64	-0.0318
8.63	0.0394		8.65	-0.0035		8.64	-0.0041		8.63	-0.0034		8.64	-0.0329
8.63	0.0391		8.65	0.0239		8.65	-0.0028		8.63	0.0213		8.65	-0.0341
8.64	0.0388		8.66	0.0325		8.65	0.0274		8.64	0.026		8.65	-0.0086
8.65	0.0386		8.67	0.0338		8.65	0.0344		8.65	0.0263		8.66	-0.003
8.66	0.0383		8.68	0.0341		8.66	0.0343		8.66	0.0263		8.67	-0.0021
8.67	0.0378		8.69	0.0342		8.67	0.034		8.67	0.0262		8.67	-0.0017
8.68	0.0375		8.7	0.0343		8.68	0.0336		8.68	0.0261		8.68	0.0261
8.68	0.0372		8.7	0.0343		8.69	0.0331		8.69	0.026		8.69	0.0263
8.69	0.0369		8.71	0.0344		8.7	0.0327		8.69	0.0258		8.69	0.0261
8.7	0.0367		8.72	0.0344		8.7	0.0323		8.7	0.0257		8.7	0.0259
8.71	0.0363		8.72	0.0344		8.71	0.032		8.71	0.0255		8.71	0.0257
8.72	0.0361		8.73	0.0344		8.72	0.0317		8.72	0.0254		8.72	0.0256
8.72	0.0112		8.74	0.0344		8.73	0.0314		8.73	0.0253		8.73	0.0255
8.73	0.0039		8.74	0.0344		8.74	0.0312		8.73	0.0252		8.74	0.0254
8.73	0.0027		8.75	0.0344		8.75	0.031		8.74	0.0251		8.74	0.0254
8.73	0.0023		8.75	0.0344		8.75	0.0308		8.75	0.025		8.75	0.0254
8.74	-0.0264		8.76	0.0343		8.76	0.0306		8.76	0.0249		8.76	0.0253
8.75	-0.029		8.77	0.0343		8.77	0.0304		8.77	0.0248		8.77	0.0253
8.76	-0.0307		8.78	0.0343		8.78	0.0303		8.78	0.0246		8.78	0.0252
8.77	-0.0321		8.79	0.0342		8.79	0.0302		8.79	0.0245		8.79	0.0252
8.78	-0.0335		8.8	0.0341		8.8	0.0301		8.79	0.0244		8.79	0.0252
8.78	-0.0346		8.8	0.0341		8.8	0.03		8.8	0.0242		8.8	0.0251
8.79	-0.0355		8.81	0.034		8.81	0.0298		8.81	0.0241		8.81	0.0251
8.8	-0.0368		8.82	0.0339		8.82	0.0297		8.82	0.024		8.82	0.0251
8.81	-0.038		8.83	0.0339		8.83	0.0296		8.83	0.0239		8.83	0.0251
8.82	-0.0399		8.84	0.0338		8.84	0.0295		8.84	0.0238		8.84	0.0251
8.83	-0.043		8.85	0.01		8.85	0.0294		8.84	0.0093		8.84	0.0251
8.83	-0.0441		8.85	0.003		8.85	0.0083		8.84	0.0034		8.85	0.0251
8.84	-0.0454		8.86	0.0019		8.85	0.0026		8.85	0.0024		8.86	0.0251
8.85	-0.0468		8.87	0.0014		8.86	0.0017		8.85	-0.0097		8.87	0.0251
8.86	-0.0488		8.88	-0.0253		8.86	-0.0174		8.86	-0.0142		8.87	0.0068
8.87	-0.0512		8.89	-0.0276		8.87	-0.0219		8.87	-0.0163		8.88	0.0024
8.88	-0.0552		8.9	-0.029		8.88	-0.0237		8.88	-0.018		8.89	0.0016
8.88	-0.0609		8.9	-0.0299		8.89	-0.0249		8.88	-0.0192		8.89	0.0012
8.89	-0.0681		8.91	-0.0307		8.9	-0.0258		8.89	-0.0203		8.89	-0.02
8.9	-0.0894		8.92	-0.0314		8.9	-0.0266		8.9	-0.0212		8.9	-0.0215
8.91	-0.1021		8.93	-0.0319		8.91	-0.0274		8.91	-0.0221		8.91	-0.0225
8.92	-0.1511		8.94	-0.0325		8.92	-0.0282		8.92	-0.023		8.92	-0.0232
8.93	-0.2163		8.94	-0.0331		8.93	-0.029		8.93	-0.0237		8.93	-0.0239
8.93	-0.2226		8.95	-0.0337		8.94	-0.0297		8.94	-0.0245		8.94	-0.0245
8.93	-0.0187		8.95	-0.0343		8.95	-0.0305		8.94	-0.0252		8.94	-0.0251
8.94	-0.0058		8.95	-0.035		8.95	-0.0311		8.95	-0.0258		8.95	-0.0256
8.95	-0.004		8.96	-0.0357		8.96	-0.0318		8.96	-0.0264		8.96	-0.0261
8.95	-0.0035		8.97	-0.0364		8.97	-0.0324		8.97	-0.0271		8.97	-0.0265
8.96	0.0441		8.98	-0.0371		8.98	-0.033		8.98	-0.0278		8.98	-0.0269
8.97	0.0448		8.99	-0.0379		8.99	-0.0337		8.98	-0.0285		8.99	-0.0272
8.98	0.0453		9	-0.0387		9	-0.0343		8.99	-0.0294		8.99	-0.0275
8.98	0.0435		9	-0.0396		9	-0.0352		9	-0.0304		9	-0.0279
8.99	0.043		9.01	-0.0405		9.01	-0.0361		9.01	-0.0317		9.01	-0.0281
9	0.0415		9.02	-0.0415		9.02	-0.0371		9.02	-0.0333		9.02	-0.0284
9.01	0.0405		9.03	-0.0424		9.03	-0.0384		9.03	-0.0354		9.03	-0.0288
9.02	0.0402		9.04	-0.0433		9.04	-0.0401		9.04	-0.0378		9.04	-0.0291
9.03	0.0398		9.05	-0.0442		9.05	-0.0421		9.04	-0.0405		9.04	-0.0296
9.03	0.0395		9.05	-0.0449		9.05	-0.0443		9.05	-0.0427		9.05	-0.0301
9.04	0.0393		9.06	-0.0143		9.06	-0.0464		9.05	-0.0136		9.06	-0.0308
9.05	0.0391		9.07	-0.0048		9.06	-0.0128		9.06	-0.0048		9.07	-0.0316
9.06	0.0389		9.08	-0.0035		9.07	-0.004		9.07	-0.0035		9.08	-0.0329
9.07	0.0388		9.09	-0.003		9.08	-0.0028		9.07	0.0217		9.09	-0.0341
9.08	0.0384		9.1	0.0328		9.08	0.0276		9.08	0.0261		9.09	-0.0094
9.08	0.0384		9.1	0.0343		9.09	0.0344		9.09	0.0264		9.09	-0.003
9.09	0.0382		9.11	0.0346		9.1	0.0344		9.09	0.0265		9.1	-0.0021
9.1	0.0381		9.12	0.0347		9.1	0.0339		9.1	0.0264		9.1	-0.0018
9.11	0.0378		9.13	0.0348		9.11	0.0335		9.11	0.0263		9.11	0.026
9.12	0.0375		9.14	0.0349		9.12	0.0331		9.12	0.0262		9.12	0.0262
9.13	0.0373		9.15	0.035		9.13	0.0328		9.13	0.026		9.13	0.0261
9.13	0.0371		9.15	0.035		9.14	0.0325		9.13	0.0258		9.14	0.0259
9.14	0.0368		9.15	0.0351		9.15	0.0323		9.14	0.0257		9.14	0.0257
9.15	0.0366		9.16	0.0351		9.15	0.0321		9.15	0.0256		9.15	0.0256
9.15	0.0117		9.17	0.0351		9.16	0.0319		9.16	0.0255		9.16	0.0255
9.16	0.004		9.17	0.0351		9.17	0.0318		9.17	0.0254		9.17	0.0254
9.17	0.0028		9.18	0.0351		9.18	0.0317		9.18	0.0253		9.18	0.0254
9.17	0.0023		9.19	0.0352		9.19	0.0315		9.19	0.0252		9.19	0.0253
9.18	-0.0261		9.2	0.0352		9.2	0.0315		9.19	0.0251		9.19	0.0253
9.18	-0.0286		9.2	0.0352		9.2	0.0313		9.2	0.0251		9.2	0.0252
9.19	-0.0305		9.21	0.0352		9.21	0.0312		9.21	0.025		9.21	0.0252
9.2	-0.032		9.22	0.0351		9.22	0.0311		9.22	0.0249		9.22	0.0252
9.21	-0.0338		9.23	0.0351		9.23	0.031		9.23	0.0248		9.23	0.0251
9.22	-0.0356		9.24	0.035		9.24	0.0308		9.23	0.0247		9.24	0.0251
9.23	-0.0371		9.25	0.035		9.25	0.0307		9.24	0.0246		9.24	0.0251
9.23	-0.0388		9.25	0.0349		9.25	0.0306		9.25	0.0245		9.25	0.0251
9.24	-0.0399		9.26	0.0348		9.26	0.0304		9.26	0.0243		9.26	0.0251
9.25	-0.0413		9.27	0.0348		9.27	0.0302		9.27	0.0243		9.27	0.0251
9.26	-0.0425		9.28	0.0113		9.28	0.0301		9.27	0.0093		9.28	0.0251
9.27	-0.0438		9.29	0.0031		9.28	0.0088		9.28	0.0035		9.29	0.0251
9.28	-0.0457		9.3	0.002		9.29	0.0027		9.29	0.0025		9.29	0.0251
9.28	-0.048		9.3	-0.0203		9.3	0.0018		9.29	-0.0098		9.3	0.0251
9.29	-0.051		9.31	-0.0259		9.3	-0.0175		9.29	-0.0143		9.3	0.006
9.3	-0.0563		9.32	-0.0282		9.3	-0.0219		9.3	-0.0166		9.31	0.0024
9.31	-0.0621		9.33	-0.0297		9.31	-0.0238		9.31	-0.0183		9.32	0.0016
9.32	-0.0688		9.34	-0.0308		9.32	-0.0251		9.32	-0.0196		9.32	-0.0161
9.33	-0.0747		9.35	-0.0315		9.33	-0.0261		9.33	-0.0207		9.33	-0.0201
9.33	-0.0814		9.35	-0.0322		9.34	-0.027		9.34	-0.0217		9.34	-0.0215
9.34	-0.0858		9.36	-0.0327		9.35	-0.0277		9.34	-0.0225		9.34	-0.0226
9.35	-0.0894		9.37	-0.0333		9.35	-0.0285		9.35	-0.0234		9.35	-0.0233
9.36	-0.0912		9.37	-0.0339		9.36	-0.0292		9.36	-0.0242		9.36	-0.0239
9.37	-0.0907		9.38	-0.0346		9.37	-0.03		9.37	-0.0249		9.37	-0.0245
9.37	-0.0177		9.39	-0.0352		9.38	-0.0307		9.38	-0.0256		9.38	-0.0251
9.38	-0.0057		9.39	-0.0359		9.39	-0.0311		9.38	-0.0262		9.39	-0.0256
9.38	-0.0038		9.4	-0.0365		9.4	-0.0318		9.39	-0.0269		9.39	-0.0261
9.38	-0.0034		9.4	-0.0372		9.4	-0.0324		9.4	-0.0275		9.4	-0.0264
9.39	0.0454		9.41	-0.038		9.41	-0.033		9.41	-0.0282		9.41	-0.0268
9.4	0.0441		9.42	-0.0388		9.42	-0.0337		9.42	-0.029		9.42	-0.0271
9.41	0.0431		9.43	-0.0396		9.43	-0.0344		9.43	-0.0298		9.43	-0.0275
9.42	0.0418		9.44	-0.0405		9.44	-0.0351		9.44	-0.0309		9.44	-0.0278
9.43	0.0414		9.45	-0.0415		9.45	-0.036		9.44	-0.0321		9.44	-0.0281
9.43	0.0411		9.45	-0.0425		9.45	-0.0371		9.45	-0.0336		9.45	-0.0284
9.44	0.0405		9.46	-0.0434		9.46	-0.0384		9.46	-0.0356		9.46	-0.0287
9.45	0.0402		9.47	-0.0444		9.47	-0.04		9.47	-0.0381		9.47	-0.0291
9.46	0.0399		9.48	-0.0452		9.48	-0.042		9.48	-0.0408		9.48	-0.0295
9.47	0.0396		9.49	-0.046		9.49	-0.0444		9.48	-0.043		9.49	-0.0301
9.48	0.0395		9.5	-0.0156		9.5	-0.0465		9.48	-0.0138		9.49	-0.0307
9.48	0.0395		9.5	-0.0048		9.5	-0.013		9.49	-0.0048		9.5	-0.0316
9.49	0.0394		9.51	-0.0034		9.5	-0.004		9.5	-0.0034		9.51	-0.0329
9.5	0.0392		9.52	-0.003		9.51	-0.0028		9.5	0.0219		9.52	-0.0341
9.51	0.039		9.53	0.0334		9.51	0.0274		9.51	0.0261		9.52	-0.008
9.52	0.0388		9.54	0.0349		9.52	0.0339		9.52	0.0265		9.53	-0.0029
9.53	0.0386		9.55	0.0353		9.53	0.0341		9.53	0.0266		9.54	-0.0021
9.53	0.0383		9.55	0.0354		9.54	0.0339		9.54	0.0266		9.54	0.0226
9.54	0.0382		9.56	0.0355		9.55	0.0336		9.54	0.0264		9.54	0.0261
9.55	0.038		9.57	0.0356		9.55	0.0336		9.55	0.0263		9.55	0.0262
9.56	0.0377		9.58	0.0357		9.56	0.0333		9.56	0.0261		9.56	0.0261
9.57	0.0376		9.59	0.0358		9.57	0.033		9.57	0.026		9.57	0.0259
9.58	0.0374		9.59	0.0358		9.58	0.0327		9.58	0.0258		9.58	0.0257
9.58	0.0371		9.6	0.0358		9.59	0.0325		9.59	0.0257		9.59	0.0256
9.58	0.012		9.6	0.0359		9.6	0.0322		9.59	0.0255		9.59	0.0254
9.59	0.0041		9.6	0.0359		9.6	0.032		9.6	0.0254		9.6	0.0254
9.6	0.0028		9.61	0.036		9.61	0.0319		9.61	0.0253		9.61	0.0254
9.6	0.0024		9.62	0.036		9.62	0.0319		9.62	0.0252		9.62	0.0253
9.61	-0.0261		9.63	0.036		9.63	0.0319		9.63	0.0252		9.63	0.0253
9.62	-0.0284		9.64	0.036		9.64	0.0318		9.63	0.0251		9.64	0.0252
9.63	-0.03		9.65	0.0361		9.65	0.0318		9.64	0.0251		9.64	0.0252
9.63	-0.0314		9.65	0.0361		9.65	0.0317		9.65	0.025		9.65	0.0252
9.64	-0.0326		9.66	0.0361		9.66	0.0316		9.66	0.025		9.66	0.0251
9.65	-0.0338		9.67	0.0361		9.67	0.0316		9.67	0.0249		9.67	0.0251
9.66	-0.035		9.68	0.036		9.68	0.0315		9.68	0.0249		9.68	0.0251
9.67	-0.0362		9.69	0.036		9.69	0.0315		9.69	0.0248		9.69	0.0251
9.68	-0.0374		9.7	0.0359		9.7	0.0314		9.69	0.0247		9.69	0.0251
9.68	-0.0386		9.7	0.0358		9.7	0.0311		9.7	0.0246		9.7	0.0251
9.69	-0.0402		9.71	0.0102		9.71	0.0309		9.7	0.0095		9.71	0.0251
9.7	-0.0437		9.72	0.0033		9.71	0.0089		9.71	0.0036		9.72	0.0252
9.71	-0.0461		9.73	0.0021		9.72	0.0028		9.72	0.0026		9.73	0.0252
9.72	-0.0487		9.74	-0.0197		9.73	0.0018		9.72	-0.0098		9.74	0.0252
9.73	-0.0507		9.75	-0.0265		9.73	-0.0169		9.73	-0.0143		9.74	0.0061
9.73	-0.0545		9.75	-0.0289		9.74	-0.0209		9.73	-0.0166		9.74	0.0024
9.74	-0.0589		9.76	-0.0305		9.75	-0.0228		9.74	-0.0184		9.75	0.0016
9.75	-0.0651		9.77	-0.0316		9.75	-0.024		9.75	-0.0198		9.75	0.0013
9.76	-0.0707		9.78	-0.0324		9.76	-0.0249		9.76	-0.0209		9.76	-0.0201
9.77	-0.0753		9.79	-0.033		9.77	-0.0258		9.77	-0.0219		9.77	-0.0216
9.78	-0.0785		9.8	-0.0336		9.78	-0.0267		9.78	-0.0227		9.78	-0.0226
9.78	-0.0818		9.8	-0.0342		9.79	-0.0275		9.79	-0.0236		9.79	-0.0233
9.79	-0.0837		9.8	-0.0348		9.8	-0.0283		9.79	-0.0244		9.79	-0.024
9.8	-0.0894		9.81	-0.0354		9.8	-0.029		9.8	-0.0251		9.8	-0.0246
9.8	-0.0199		9.82	-0.036		9.81	-0.0297		9.81	-0.0258		9.81	-0.0251
9.81	-0.0057		9.82	-0.0367		9.82	-0.0303		9.82	-0.0264		9.82	-0.0256
9.82	-0.0038		9.83	-0.0373		9.83	-0.0309		9.83	-0.0271		9.83	-0.0261
9.82	-0.0034		9.84	-0.038		9.84	-0.0315		9.84	-0.0277		9.84	-0.0265
9.83	0.0432		9.85	-0.0388		9.85	-0.0322		9.84	-0.0284		9.84	-0.0269
9.83	0.0427		9.85	-0.0395		9.85	-0.0328		9.85	-0.0291		9.85	-0.0272
9.84	0.042		9.86	-0.0404		9.86	-0.0335		9.86	-0.0299		9.86	-0.0275
9.85	0.0414		9.87	-0.0413		9.87	-0.0342		9.87	-0.0309		9.87	-0.0278
9.86	0.041		9.88	-0.0423		9.88	-0.0351		9.88	-0.0321		9.88	-0.0281
9.87	0.0406		9.89	-0.0433		9.89	-0.0361		9.88	-0.0336		9.89	-0.0284
9.88	0.0401		9.9	-0.0442		9.9	-0.0373		9.89	-0.0355		9.89	-0.0287
9.88	0.0399		9.9	-0.0452		9.9	-0.039		9.9	-0.038		9.9	-0.0291
9.89	0.04		9.91	-0.046		9.91	-0.0409		9.91	-0.0408		9.91	-0.0296
9.9	0.04		9.92	-0.0468		9.92	-0.0433		9.92	-0.0432		9.92	-0.0301
9.91	0.0399		9.93	-0.0226		9.93	-0.0456		9.92	-0.0138		9.93	-0.0307
9.92	0.0397		9.94	-0.0049		9.93	-0.0129		9.93	-0.0048		9.94	-0.0316
9.93	0.0395		9.95	-0.0035		9.94	-0.0041		9.94	-0.0035		9.94	-0.0329
9.93	0.0393		9.95	0.0255		9.95	-0.0028		9.94	0.022		9.95	-0.0343
9.94	0.0392		9.96	0.0337		9.95	0.0263		9.94	0.0259		9.95	-0.0084
9.95	0.0389		9.97	0.0354		9.95	0.0326		9.95	0.0265		9.96	-0.0029
9.96	0.0386		9.98	0.0357		9.96	0.0329		9.96	0.0267		9.97	-0.0021
9.97	0.0387		9.99	0.0359		9.97	0.0327		9.97	0.0267		9.97	-0.0017
9.98	0.0385		10	0.0361		9.98	0.0324		9.98	0.0265		9.98	0.0262
9.98	0.0382		10	0.0362		9.99	0.0322		9.98	0.0264		9.99	0.0264
9.99	0.0379		10.01	0.0363		10	0.0324		9.99	0.0263		9.99	0.0261
10	0.0378		10.02	0.0364		10	0.032		10	0.0261		10	0.0259
10.01	0.0376		10.02	0.0365		10.01	0.032		10.01	0.026		10.01	0.0258
10.02	0.0374		10.03	0.0365		10.02	0.0317		10.02	0.0258		10.02	0.0256
10.02	0.0173		10.04	0.0366		10.03	0.0315		10.03	0.0256		10.03	0.0256
10.03	0.0042		10.04	0.0366		10.04	0.0314		10.04	0.0256		10.04	0.0255
10.03	0.0029		10.05	0.0367		10.05	0.0313		10.04	0.0255		10.04	0.0254
10.03	-0.0203		10.05	0.0367		10.05	0.0312		10.05	0.0254		10.05	0.0254
10.04	-0.0259		10.06	0.0367		10.06	0.0311		10.06	0.0253		10.06	0.0254
10.05	-0.0285		10.07	0.0367		10.07	0.031		10.07	0.0252		10.07	0.0254
10.06	-0.0303		10.08	0.0368		10.08	0.0309		10.08	0.0252		10.08	0.0253
10.07	-0.0316		10.09	0.0368		10.09	0.0309		10.09	0.0252		10.09	0.0253
10.08	-0.0326		10.1	0.0369		10.1	0.0309		10.09	0.0252		10.09	0.0253
10.08	-0.0336		10.1	0.0368		10.1	0.0308		10.1	0.0251		10.1	0.0253
10.09	-0.0348		10.11	0.0369		10.11	0.0308		10.11	0.0251		10.11	0.0253
10.1	-0.036		10.12	0.0368		10.12	0.0306		10.12	0.0251		10.12	0.0252
10.11	-0.0374		10.13	0.0367		10.13	0.0305		10.13	0.0249		10.13	0.0253
10.12	-0.0386		10.14	0.0367		10.14	0.0303		10.13	0.0249		10.14	0.0253
10.13	-0.0399		10.15	0.0104		10.15	0.0302		10.13	0.0096		10.14	0.0253
10.13	-0.0416		10.15	0.0034		10.15	0.009		10.14	0.0037		10.15	0.0253
10.14	-0.0434		10.16	0.0023		10.15	0.0029		10.15	0.0027		10.16	0.0253
10.15	-0.0456		10.17	-0.0201		10.16	0.0019		10.15	-0.01		10.17	0.0253
10.16	-0.0481		10.18	-0.0269		10.16	-0.0161		10.16	-0.0144		10.17	0.0065
10.17	-0.0509		10.19	-0.0295		10.17	-0.02		10.17	-0.0168		10.18	0.0024
10.18	-0.0561		10.2	-0.0312		10.18	-0.022		10.18	-0.0186		10.19	0.0016
10.18	-0.0614		10.2	-0.0323		10.19	-0.0234		10.19	-0.02		10.19	0.0013
10.19	-0.0671		10.21	-0.033		10.2	-0.0244		10.19	-0.0211		10.19	-0.0202
10.2	-0.072		10.22	-0.0336		10.2	-0.0253		10.2	-0.0221		10.2	-0.0217
10.21	-0.0766		10.23	-0.0342		10.21	-0.0261		10.21	-0.023		10.21	-0.0226
10.22	-0.0806		10.24	-0.0348		10.22	-0.0268		10.22	-0.0239		10.22	-0.0234
10.23	-0.1113		10.24	-0.0354		10.23	-0.0275		10.23	-0.0247		10.23	-0.0241
10.23	-0.1303		10.25	-0.036		10.24	-0.0283		10.23	-0.0253		10.24	-0.0246
10.23	-0.0188		10.25	-0.0367		10.25	-0.0289		10.24	-0.026		10.24	-0.0251
10.24	-0.0056		10.25	-0.0373		10.25	-0.0296		10.25	-0.0267		10.25	-0.0257
10.25	-0.0038		10.26	-0.038		10.26	-0.0302		10.26	-0.0273		10.26	-0.0261
10.25	-0.0034		10.27	-0.0387		10.27	-0.0308		10.27	-0.0279		10.27	-0.0265
10.26	0.044		10.28	-0.0395		10.28	-0.0314		10.28	-0.0286		10.28	-0.0269
10.27	0.0429		10.29	-0.0403		10.29	-0.032		10.29	-0.0293		10.29	-0.0271
10.28	0.0424		10.3	-0.0411		10.3	-0.0327		10.29	-0.0301		10.29	-0.0275
10.28	0.0414		10.3	-0.042		10.3	-0.0334		10.3	-0.031		10.3	-0.0278
10.29	0.0404		10.31	-0.0429		10.31	-0.0342		10.31	-0.0323		10.31	-0.0281
10.3	0.04		10.32	-0.0439		10.32	-0.0352		10.32	-0.0337		10.32	-0.0284
10.31	0.0395		10.33	-0.0448		10.33	-0.0364		10.33	-0.0356		10.33	-0.0287
10.32	0.0391		10.34	-0.0457		10.34	-0.038		10.34	-0.0379		10.34	-0.0291
10.33	0.0389		10.35	-0.0466		10.35	-0.0399		10.34	-0.0406		10.34	-0.0295
10.33	0.0388		10.35	-0.0473		10.35	-0.0423		10.35	-0.043		10.35	-0.0301
10.34	0.0388		10.36	-0.0141		10.36	-0.0447		10.35	-0.0136		10.36	-0.0307
10.35	0.0387		10.37	-0.005		10.36	-0.0128		10.36	-0.0048		10.37	-0.0316
10.36	0.0388		10.38	-0.0035		10.37	-0.0041		10.37	-0.0035		10.38	-0.0329
10.37	0.039		10.39	-0.0031		10.38	-0.0028		10.37	0.022		10.39	-0.0344
10.38	0.0391		10.4	0.034		10.38	0.0253		10.38	0.026		10.39	-0.0085
10.38	0.0392		10.4	0.0357		10.39	0.0314		10.38	0.0266		10.39	-0.0029
10.39	0.0391		10.41	0.0361		10.4	0.0318		10.39	0.0268		10.4	-0.0021
10.4	0.0389		10.42	0.0363		10.4	0.0316		10.4	0.0268		10.4	-0.0017
10.41	0.0388		10.43	0.0365		10.41	0.0312		10.41	0.0267		10.41	0.0263
10.42	0.0387		10.44	0.0366		10.42	0.0309		10.42	0.0265		10.42	0.0264
10.43	0.0386		10.45	0.0367		10.43	0.0307		10.43	0.0264		10.43	0.0262
10.43	0.0384		10.45	0.0368		10.44	0.0305		10.44	0.0262		10.44	0.026
10.44	0.0382		10.45	0.0369		10.45	0.0304		10.44	0.0261		10.44	0.0259
10.45	0.038		10.46	0.037		10.45	0.0302		10.45	0.0259		10.45	0.0257
10.45	0.0114		10.47	0.037		10.46	0.03		10.46	0.0258		10.46	0.0256
10.46	0.0043		10.47	0.037		10.47	0.03		10.47	0.0257		10.47	0.0256
10.47	0.003		10.48	0.037		10.48	0.0299		10.48	0.0255		10.48	0.0255
10.47	-0.0205		10.49	0.0371		10.49	0.03		10.48	0.0255		10.49	0.0254
10.48	-0.026		10.5	0.0371		10.5	0.0301		10.49	0.0253		10.49	0.0254
10.48	-0.0284		10.5	0.0372		10.5	0.0303		10.5	0.0253		10.5	0.0254
10.49	-0.0302		10.51	0.0372		10.51	0.0302		10.51	0.0253		10.51	0.0254
10.5	-0.0315		10.52	0.0373		10.52	0.0302		10.52	0.0252		10.52	0.0254
10.51	-0.0325		10.53	0.0373		10.53	0.0302		10.53	0.0253		10.53	0.0254
10.52	-0.0338		10.54	0.0374		10.54	0.0301		10.54	0.0253		10.54	0.0253
10.53	-0.0352		10.55	0.0374		10.55	0.03		10.54	0.0252		10.54	0.0253
10.53	-0.037		10.55	0.0374		10.55	0.0299		10.55	0.0252		10.55	0.0253
10.54	-0.039		10.56	0.0373		10.56	0.0298		10.56	0.0251		10.56	0.0253
10.55	-0.0404		10.57	0.0373		10.57	0.0297		10.57	0.0251		10.57	0.0252
10.56	-0.0424		10.58	0.0116		10.58	0.0296		10.57	0.0097		10.58	0.0252
10.57	-0.0485		10.59	0.0036		10.58	0.009		10.58	0.0038		10.59	0.0253
10.58	-0.0506		10.6	0.0023		10.59	0.003		10.59	0.0027		10.59	0.0253
10.58	-0.0541		10.6	-0.0213		10.6	0.002		10.59	-0.0099		10.6	0.0253
10.59	-0.0581		10.61	-0.0272		10.6	-0.0153		10.59	-0.0145		10.6	0.0068
10.6	-0.0633		10.62	-0.0299		10.6	-0.0199		10.6	-0.0169		10.61	0.0024
10.61	-0.0712		10.63	-0.0316		10.61	-0.0218		10.61	-0.0188		10.62	0.0016
10.62	-0.0875		10.64	-0.0327		10.62	-0.0231		10.62	-0.0202		10.62	0.0013
10.63	-0.0999		10.65	-0.0335		10.63	-0.0239		10.63	-0.0213		10.63	-0.0202
10.63	-0.1135		10.65	-0.034		10.64	-0.0246		10.63	-0.0223		10.64	-0.0217
10.64	-0.2427		10.66	-0.0346		10.65	-0.0254		10.64	-0.0232		10.64	-0.0226
10.65	-0.2774		10.67	-0.0352		10.65	-0.0261		10.65	-0.024		10.65	-0.0234
10.66	-0.3056		10.67	-0.0358		10.66	-0.0268		10.66	-0.0248		10.66	-0.024
10.67	-0.3488		10.68	-0.0365		10.67	-0.0275		10.67	-0.0255		10.67	-0.0246
10.67	-0.0172		10.69	-0.0371		10.68	-0.0282		10.68	-0.0262		10.68	-0.0251
10.68	-0.0057		10.69	-0.0378		10.69	-0.0288		10.69	-0.0269		10.69	-0.0256
10.68	-0.0039		10.7	-0.0384		10.7	-0.0295		10.69	-0.0274		10.69	-0.0261
10.68	0.095		10.7	-0.0391		10.7	-0.03		10.7	-0.0281		10.7	-0.0265
10.69	0.041		10.71	-0.0398		10.71	-0.0306		10.71	-0.0288		10.71	-0.0268
10.7	0.0401		10.72	-0.0407		10.72	-0.0312		10.72	-0.0294		10.72	-0.0271
10.71	0.0394		10.73	-0.0416		10.73	-0.0319		10.73	-0.0303		10.73	-0.0274
10.72	0.039		10.74	-0.0425		10.74	-0.0326		10.73	-0.0312		10.74	-0.0277
10.73	0.0387		10.75	-0.0435		10.75	-0.0334		10.74	-0.0324		10.74	-0.0281
10.73	0.0384		10.75	-0.0446		10.75	-0.0344		10.75	-0.0338		10.75	-0.0284
10.74	0.038		10.76	-0.0455		10.76	-0.0356		10.76	-0.0357		10.76	-0.0287
10.75	0.0378		10.77	-0.0466		10.77	-0.0371		10.77	-0.038		10.77	-0.0291
10.76	0.0375		10.78	-0.0474		10.78	-0.0391		10.78	-0.0408		10.78	-0.0295
10.77	0.0373		10.79	-0.048		10.79	-0.0415		10.79	-0.0434		10.79	-0.03
10.78	0.0372		10.8	-0.0161		10.8	-0.0439		10.79	-0.0137		10.79	-0.0307
10.78	0.0373		10.8	-0.0051		10.8	-0.0132		10.79	-0.0048		10.8	-0.0316
10.79	0.0373		10.81	-0.0036		10.8	-0.0041		10.8	-0.0035		10.81	-0.0329
10.8	0.0373		10.82	0.0261		10.81	-0.0028		10.8	0.0221		10.82	-0.0344
10.81	0.0376		10.83	0.0343		10.81	0.0246		10.81	0.0261		10.82	-0.0093
10.82	0.0379		10.84	0.036		10.82	0.0307		10.82	0.0266		10.83	-0.0029
10.83	0.0389		10.85	0.0364		10.83	0.0312		10.83	0.0269		10.84	-0.0021
10.83	0.039		10.85	0.0366		10.84	0.031		10.84	0.0269		10.84	-0.0017
10.84	0.0389		10.86	0.0368		10.85	0.0307		10.84	0.0268		10.84	0.0263
10.85	0.0388		10.87	0.0369		10.85	0.0308		10.85	0.0266		10.85	0.0264
10.86	0.0386		10.88	0.0371		10.86	0.0305		10.86	0.0265		10.86	0.0261
10.87	0.0386		10.89	0.0372		10.87	0.0303		10.87	0.0263		10.87	0.0259
10.88	0.0384		10.89	0.0372		10.88	0.0303		10.88	0.0262		10.88	0.0258
10.88	0.0382		10.9	0.0373		10.89	0.0301		10.88	0.026		10.89	0.0256
10.88	0.0115		10.9	0.0373		10.9	0.03		10.89	0.0259		10.89	0.0255
10.89	0.0044		10.9	0.0374		10.9	0.0299		10.9	0.0257		10.9	0.0255
10.9	0.003		10.91	0.0374		10.91	0.0301		10.91	0.0256		10.91	0.0254
10.9	-0.0198		10.92	0.0375		10.92	0.0301		10.92	0.0255		10.92	0.0254
10.91	-0.0258		10.93	0.0375		10.93	0.0301		10.93	0.0254		10.93	0.0254
10.92	-0.0283		10.94	0.0376		10.94	0.0301		10.94	0.0253		10.94	0.0253
10.93	-0.0299		10.95	0.0376		10.95	0.0304		10.94	0.0253		10.94	0.0253
10.93	-0.031		10.95	0.0377		10.95	0.0303		10.95	0.0253		10.95	0.0252
10.94	-0.0319		10.96	0.0377		10.96	0.0306		10.96	0.0253		10.96	0.0252
10.95	-0.0327		10.97	0.0378		10.97	0.0305		10.97	0.0253		10.97	0.0252
10.96	-0.0336		10.98	0.0378		10.98	0.0305		10.98	0.0253		10.98	0.0252
10.97	-0.0345		10.99	0.0378		10.99	0.0305		10.98	0.0253		10.99	0.0252
10.98	-0.0355		11	0.0378		11	0.0304		10.99	0.0253		10.99	0.0252
10.98	-0.0365		11	0.0377		11	0.0303		11	0.0252		11	0.0252
10.99	-0.0377		11.01	0.011		11.01	0.0302		11	0.0097		11.01	0.0252
11	-0.039		11.02	0.0037		11.01	0.0091		11.01	0.0038		11.02	0.0252
11.01	-0.0401		11.03	0.0024		11.02	0.003		11.02	0.0028		11.03	0.0252
11.02	-0.0416		11.04	0.0019		11.03	0.002		11.02	-0.0101		11.04	0.0252
11.03	-0.0438		11.05	-0.0275		11.03	-0.0159		11.03	-0.0145		11.04	0.006
11.03	-0.0463		11.05	-0.0302		11.04	-0.0197		11.04	-0.017		11.04	0.0024
11.04	-0.0491		11.06	-0.032		11.05	-0.0214		11.04	-0.0188		11.05	0.0016
11.05	-0.0526		11.07	-0.0331		11.05	-0.023		11.05	-0.0203		11.05	-0.0159
11.06	-0.0566		11.08	-0.0338		11.06	-0.0239		11.06	-0.0214		11.06	-0.0201
11.07	-0.0617		11.09	-0.0344		11.07	-0.0247		11.07	-0.0224		11.07	-0.0216
11.08	-0.0671		11.1	-0.035		11.08	-0.0255		11.08	-0.0233		11.08	-0.0226
11.08	-0.0713		11.1	-0.0356		11.09	-0.0263		11.09	-0.0241		11.09	-0.0233
11.09	-0.0746		11.1	-0.0362		11.1	-0.0271		11.09	-0.0249		11.09	-0.0239
11.1	-0.0763		11.11	-0.0369		11.1	-0.0279		11.1	-0.0256		11.1	-0.0245
11.1	-0.0165		11.12	-0.0375		11.11	-0.0285		11.11	-0.0263		11.11	-0.0251
11.11	-0.0055		11.12	-0.0381		11.12	-0.0292		11.12	-0.0269		11.12	-0.0256
11.12	-0.0038		11.13	-0.0388		11.13	-0.0298		11.13	-0.0276		11.13	-0.026
11.12	0.0557		11.14	-0.0395		11.14	-0.0304		11.13	-0.0282		11.14	-0.0264
11.13	0.0409		11.15	-0.0403		11.15	-0.0309		11.14	-0.0288		11.14	-0.0267
11.13	0.0407		11.15	-0.041		11.15	-0.0315		11.15	-0.0296		11.15	-0.0271
11.14	0.0404		11.16	-0.0419		11.16	-0.0321		11.16	-0.0303		11.16	-0.0274
11.15	0.0401		11.17	-0.0428		11.17	-0.0328		11.17	-0.0313		11.17	-0.0276
11.16	0.0398		11.18	-0.0438		11.18	-0.0336		11.18	-0.0324		11.18	-0.0279
11.17	0.0394		11.19	-0.0448		11.19	-0.0346		11.19	-0.0338		11.19	-0.0282
11.18	0.0391		11.2	-0.0458		11.2	-0.0358		11.19	-0.0357		11.19	-0.0286
11.18	0.0389		11.2	-0.0468		11.2	-0.0373		11.2	-0.038		11.2	-0.0289
11.19	0.0389		11.21	-0.0477		11.21	-0.0392		11.21	-0.0408		11.21	-0.0293
11.2	0.0391		11.22	-0.0485		11.22	-0.0415		11.22	-0.0435		11.22	-0.0299
11.21	0.0391		11.23	-0.015		11.23	-0.0439		11.22	-0.0136		11.23	-0.0305
11.22	0.0393		11.24	-0.0052		11.23	-0.013		11.23	-0.0048		11.24	-0.0314
11.23	0.0393		11.25	-0.0036		11.24	-0.0041		11.23	-0.0035		11.24	-0.0326
11.23	0.039		11.25	-0.0032		11.25	-0.0028		11.23	0.0221		11.25	-0.0342
11.24	0.0391		11.26	0.0346		11.25	0.0247		11.24	0.0261		11.25	-0.0077
11.25	0.0393		11.27	0.0364		11.25	0.0304		11.25	0.0267		11.26	-0.0029
11.26	0.0393		11.28	0.0367		11.26	0.0309		11.26	0.027		11.27	-0.002
11.27	0.0393		11.29	0.037		11.27	0.0308		11.27	0.027		11.27	0.0229
11.28	0.0392		11.3	0.0372		11.28	0.0307		11.28	0.0268		11.28	0.0261
11.28	0.0392		11.3	0.0373		11.29	0.0309		11.29	0.0267		11.29	0.0262
11.29	0.0391		11.31	0.0374		11.3	0.0306		11.29	0.0266		11.29	0.026
11.3	0.039		11.32	0.0375		11.3	0.0303		11.3	0.0264		11.3	0.0259
11.31	0.0389		11.32	0.0376		11.31	0.0301		11.31	0.0263		11.31	0.0256
11.32	0.0387		11.33	0.0376		11.32	0.0299		11.32	0.0261		11.32	0.0256
11.32	0.0114		11.34	0.0377		11.33	0.0298		11.33	0.026		11.33	0.0255
11.33	0.0045		11.34	0.0377		11.34	0.0297		11.34	0.0258		11.34	0.0254
11.33	0.0031		11.35	0.0378		11.35	0.0296		11.34	0.0257		11.34	0.0254
11.33	-0.0211		11.35	0.0378		11.35	0.0304		11.35	0.0256		11.35	0.0253
11.34	-0.0261		11.36	0.0378		11.36	0.0303		11.36	0.0255		11.36	0.0253
11.35	-0.0284		11.37	0.0379		11.37	0.0303		11.37	0.0254		11.37	0.0253
11.36	-0.0299		11.38	0.038		11.38	0.0303		11.38	0.0254		11.38	0.0252
11.37	-0.031		11.39	0.038		11.39	0.0304		11.38	0.0254		11.39	0.0252
11.38	-0.032		11.4	0.0382		11.4	0.0303		11.39	0.0254		11.39	0.0252
11.38	-0.0329		11.4	0.0382		11.4	0.0304		11.4	0.0254		11.4	0.0251
11.39	-0.0338		11.41	0.0383		11.41	0.0305		11.41	0.0255		11.41	0.0251
11.4	-0.0347		11.42	0.0383		11.42	0.0305		11.42	0.0255		11.42	0.0251
11.41	-0.0357		11.43	0.0383		11.43	0.0304		11.43	0.0254		11.43	0.0251
11.42	-0.0364		11.44	0.0383		11.44	0.0303		11.44	0.0253		11.44	0.0251
11.43	-0.0374		11.45	0.0119		11.45	0.0302		11.44	0.0096		11.44	0.0251
11.43	-0.0384		11.45	0.0037		11.45	0.0092		11.44	0.0039		11.45	0.0251
11.44	-0.0396		11.46	0.0025		11.45	0.0031		11.45	0.0029		11.46	0.0251
11.45	-0.0408		11.47	0.002		11.46	0.0021		11.45	-0.0099		11.47	0.0251
11.46	-0.0425		11.48	-0.0278		11.46	-0.0154		11.46	-0.0146		11.47	0.0061
11.47	-0.0444		11.49	-0.0306		11.47	-0.0197		11.47	-0.017		11.48	0.0024
11.48	-0.0468		11.5	-0.0324		11.48	-0.0218		11.48	-0.0189		11.49	0.0016
11.48	-0.0498		11.5	-0.0335		11.49	-0.0234		11.48	-0.0203		11.49	0.0013
11.49	-0.0546		11.51	-0.0343		11.5	-0.0242		11.49	-0.0215		11.49	-0.0201
11.5	-0.0601		11.52	-0.0349		11.5	-0.0252		11.5	-0.0225		11.5	-0.0216
11.51	-0.0653		11.53	-0.0355		11.51	-0.0261		11.51	-0.0234		11.51	-0.0225
11.52	-0.0692		11.54	-0.0361		11.52	-0.027		11.52	-0.0243		11.52	-0.0233
11.53	-0.0713		11.54	-0.0367		11.53	-0.0277		11.53	-0.025		11.53	-0.0239
11.53	-0.0725		11.55	-0.0373		11.54	-0.0284		11.54	-0.0257		11.54	-0.0244
11.53	-0.0194		11.55	-0.038		11.55	-0.0291		11.54	-0.0264		11.54	-0.0249
11.54	-0.0054		11.55	-0.0386		11.55	-0.0297		11.55	-0.027		11.55	-0.0254
11.55	-0.0037		11.56	-0.0392		11.56	-0.0303		11.56	-0.0276		11.56	-0.0259
11.55	0.0531		11.57	-0.04		11.57	-0.0309		11.57	-0.0283		11.57	-0.0263
11.56	0.0417		11.58	-0.0407		11.58	-0.0314		11.58	-0.0289		11.58	-0.0266
11.57	0.0418		11.59	-0.0415		11.59	-0.032		11.59	-0.0296		11.59	-0.0269
11.58	0.0412		11.6	-0.0424		11.6	-0.0326		11.59	-0.0304		11.59	-0.0272
11.58	0.0401		11.6	-0.0433		11.6	-0.0333		11.6	-0.0313		11.6	-0.0275
11.59	0.0395		11.61	-0.0444		11.61	-0.0341		11.61	-0.0324		11.61	-0.0278
11.6	0.0391		11.62	-0.0455		11.62	-0.035		11.62	-0.0339		11.62	-0.0281
11.61	0.0388		11.63	-0.0466		11.63	-0.0361		11.63	-0.0357		11.63	-0.0284
11.62	0.0385		11.64	-0.0476		11.64	-0.0376		11.63	-0.038		11.64	-0.0288
11.63	0.0383		11.65	-0.0486		11.65	-0.0395		11.64	-0.0409		11.64	-0.0291
11.63	0.0382		11.65	-0.0493		11.65	-0.0419		11.65	-0.0436		11.65	-0.0297
11.64	0.0382		11.66	-0.0158		11.66	-0.0443		11.65	-0.0135		11.66	-0.0304
11.65	0.0382		11.67	-0.0052		11.66	-0.0129		11.66	-0.0049		11.67	-0.0313
11.66	0.0383		11.68	-0.0037		11.67	-0.0041		11.67	-0.0036		11.68	-0.0326
11.67	0.0383		11.69	-0.0032		11.68	-0.0028		11.67	0.0221		11.69	-0.0341
11.68	0.0385		11.7	0.0352		11.68	0.0251		11.68	0.0261		11.69	-0.0079
11.68	0.0385		11.7	0.0369		11.69	0.0309		11.69	0.0267		11.69	-0.0029
11.69	0.0385		11.71	0.0373		11.7	0.0314		11.69	0.0269		11.7	-0.002
11.7	0.0385		11.72	0.0375		11.7	0.0313		11.7	0.027		11.7	0.0216
11.71	0.0386		11.73	0.0376		11.71	0.0312		11.71	0.0269		11.71	0.0261
11.72	0.0387		11.74	0.0378		11.72	0.0311		11.72	0.0268		11.72	0.0261
11.73	0.0386		11.75	0.0379		11.73	0.0307		11.73	0.0267		11.73	0.026
11.73	0.0386		11.75	0.038		11.74	0.0306		11.73	0.0265		11.74	0.0258
11.74	0.0385		11.75	0.0381		11.75	0.0303		11.74	0.0263		11.74	0.0256
11.75	0.0383		11.76	0.0382		11.75	0.0302		11.75	0.0261		11.75	0.0255
11.75	0.0113		11.77	0.0382		11.76	0.0302		11.76	0.026		11.76	0.0254
11.76	0.0046		11.77	0.0382		11.77	0.0302		11.77	0.0258		11.77	0.0254
11.77	0.0031		11.78	0.0383		11.78	0.0303		11.78	0.0257		11.78	0.0254
11.77	-0.0205		11.79	0.0383		11.79	0.0301		11.79	0.0256		11.79	0.0253
11.78	-0.0259		11.8	0.0384		11.8	0.0302		11.79	0.0255		11.79	0.0252
11.78	-0.0284		11.8	0.0384		11.8	0.0303		11.8	0.0254		11.8	0.0252
11.79	-0.0299		11.81	0.0384		11.81	0.0303		11.81	0.0254		11.81	0.0252
11.8	-0.0309		11.82	0.0385		11.82	0.0305		11.82	0.0254		11.82	0.0251
11.81	-0.0318		11.83	0.0385		11.83	0.0305		11.83	0.0254		11.83	0.0251
11.82	-0.0327		11.84	0.0385		11.84	0.0305		11.84	0.0255		11.84	0.0251
11.83	-0.0336		11.85	0.0386		11.85	0.0304		11.84	0.0255		11.84	0.0251
11.83	-0.0345		11.85	0.0387		11.85	0.0304		11.85	0.0255		11.85	0.0251
11.84	-0.0354		11.86	0.0387		11.86	0.0304		11.86	0.0255		11.86	0.0251
11.85	-0.0364		11.87	0.0387		11.87	0.0304		11.87	0.0254		11.87	0.0251
11.86	-0.0375		11.88	0.0111		11.88	0.0303		11.87	0.0096		11.88	0.0251
11.87	-0.0386		11.89	0.0038		11.88	0.0092		11.88	0.004		11.89	0.0251
11.88	-0.0397		11.9	0.0025		11.89	0.0032		11.88	0.0029		11.89	0.0252
11.88	-0.041		11.9	0.002		11.9	0.0021		11.88	-0.01		11.9	0.0252
11.89	-0.0426		11.91	-0.0283		11.9	-0.0157		11.89	-0.0146		11.9	0.0065
11.9	-0.0446		11.92	-0.031		11.9	-0.0197		11.9	-0.017		11.91	0.0024
11.91	-0.0471		11.93	-0.0328		11.91	-0.0219		11.91	-0.019		11.92	0.0016
11.92	-0.05		11.94	-0.0339		11.92	-0.0234		11.92	-0.0204		11.92	0.0013
11.93	-0.0539		11.95	-0.0346		11.93	-0.0243		11.93	-0.0216		11.93	-0.0202
11.93	-0.0588		11.95	-0.0352		11.94	-0.0252		11.94	-0.0226		11.94	-0.0216
11.94	-0.0637		11.96	-0.0358		11.95	-0.026		11.94	-0.0235		11.94	-0.0226
11.95	-0.0684		11.97	-0.0364		11.95	-0.0269		11.95	-0.0243		11.95	-0.0233
11.96	-0.0721		11.97	-0.037		11.96	-0.0277		11.96	-0.0251		11.96	-0.0239
11.97	-0.0742		11.98	-0.0377		11.97	-0.0284		11.97	-0.0258		11.97	-0.0245
11.97	-0.0295		11.99	-0.0383		11.98	-0.0291		11.98	-0.0265		11.98	-0.0251
11.98	-0.0054		11.99	-0.039		11.99	-0.0298		11.98	-0.0271		11.99	-0.0255
11.98	-0.0037		12	-0.0396		12	-0.0303		11.99	-0.0277		11.99	-0.0259
11.98	-0.0032		12	-0.0403		12	-0.0308		12	-0.0284		12	-0.0264
11.99	0.0418		12.01	-0.0409		12.01	-0.0314		12.01	-0.029		12.01	-0.0266
12	0.0416		12.02	-0.0417		12.02	-0.032		12.02	-0.0297		12.02	-0.027
12.01	0.0406		12.03	-0.0425		12.03	-0.0326		12.03	-0.0305		12.03	-0.0273
12.02	0.0401		12.04	-0.0434		12.04	-0.0332		12.04	-0.0314		12.04	-0.0276
12.03	0.0397		12.05	-0.0443		12.05	-0.034		12.04	-0.0326		12.04	-0.0279
12.03	0.0395		12.05	-0.0454		12.05	-0.0349		12.05	-0.034		12.05	-0.0282
12.04	0.0392		12.06	-0.0463		12.06	-0.036		12.06	-0.0357		12.06	-0.0285
12.05	0.039		12.07	-0.0472		12.07	-0.0375		12.07	-0.038		12.07	-0.0289
12.06	0.0389		12.08	-0.0481		12.08	-0.0394		12.08	-0.0409		12.08	-0.0292
12.07	0.0388		12.09	-0.0489		12.09	-0.0417		12.09	-0.0437		12.09	-0.0297
12.08	0.0386		12.1	-0.0151		12.1	-0.0442		12.09	-0.0136		12.09	-0.0304
12.08	0.0387		12.1	-0.0053		12.1	-0.0128		12.09	-0.0049		12.1	-0.0313
12.09	0.0387		12.11	-0.0039		12.1	-0.0041		12.1	-0.0036		12.11	-0.0326
12.1	0.0389		12.12	-0.0034		12.11	-0.0028		12.1	0.0223		12.12	-0.0341
12.11	0.0389		12.13	0.0352		12.11	0.0249		12.11	0.0261		12.12	-0.0083
12.12	0.0389		12.14	0.0373		12.12	0.0305		12.12	0.0267		12.13	-0.0029
12.13	0.0389		12.15	0.0378		12.13	0.031		12.13	0.027		12.14	-0.002
12.13	0.0389		12.15	0.038		12.14	0.0309		12.13	0.0271		12.14	-0.0017
12.14	0.0391		12.16	0.0383		12.15	0.0308		12.14	0.027		12.14	0.0261
12.15	0.0395		12.17	0.0384		12.15	0.0308		12.15	0.0269		12.15	0.0261
12.16	0.0396		12.18	0.0386		12.16	0.0306		12.16	0.0267		12.16	0.026
12.17	0.0396		12.19	0.0387		12.17	0.0303		12.17	0.0266		12.17	0.0258
12.18	0.0397		12.19	0.0388		12.18	0.0301		12.18	0.0264		12.18	0.0256
12.18	0.0396		12.2	0.0389		12.19	0.0298		12.19	0.0263		12.19	0.0255
12.18	0.0114		12.2	0.0389		12.2	0.0297		12.19	0.0261		12.19	0.0254
12.19	0.0046		12.2	0.0389		12.2	0.0296		12.2	0.0259		12.2	0.0254
12.2	0.0032		12.21	0.039		12.21	0.0296		12.21	0.0258		12.21	0.0254
12.2	-0.021		12.22	0.039		12.22	0.0295		12.22	0.0257		12.22	0.0253
12.21	-0.0272		12.23	0.039		12.23	0.0295		12.23	0.0256		12.23	0.0253
12.22	-0.03		12.24	0.0391		12.24	0.0295		12.23	0.0255		12.24	0.0252
12.23	-0.0318		12.25	0.0391		12.25	0.0296		12.24	0.0255		12.24	0.0252
12.23	-0.033		12.25	0.0392		12.25	0.0297		12.25	0.0255		12.25	0.0252
12.24	-0.034		12.26	0.0393		12.26	0.0302		12.26	0.0255		12.26	0.0251
12.25	-0.0349		12.27	0.0393		12.27	0.0301		12.27	0.0255		12.27	0.0252
12.26	-0.0359		12.28	0.0394		12.28	0.0301		12.28	0.0256		12.28	0.0251
12.27	-0.037		12.29	0.0395		12.29	0.0302		12.29	0.0257		12.29	0.0251
12.28	-0.0375		12.3	0.0395		12.3	0.0301		12.29	0.0257		12.29	0.0251
12.28	-0.0385		12.3	0.0395		12.3	0.03		12.3	0.0257		12.3	0.0251
12.29	-0.0393		12.31	0.0166		12.31	0.0299		12.3	0.0099		12.31	0.0251
12.3	-0.0398		12.32	0.0038		12.31	0.0092		12.31	0.004		12.32	0.0252
12.31	-0.0409		12.33	0.0025		12.32	0.0032		12.32	0.003		12.33	0.0252
12.32	-0.042		12.34	-0.022		12.33	0.0022		12.32	-0.0101		12.34	0.0252
12.33	-0.0432		12.35	-0.029		12.33	-0.0153		12.33	-0.0147		12.34	0.0067
12.33	-0.0448		12.35	-0.0317		12.34	-0.0195		12.34	-0.0172		12.34	0.0024
12.34	-0.0471		12.36	-0.0335		12.35	-0.0215		12.34	-0.0191		12.35	0.0016
12.35	-0.0501		12.37	-0.0346		12.35	-0.023		12.35	-0.0205		12.35	0.0013
12.36	-0.0542		12.38	-0.0353		12.36	-0.0242		12.36	-0.0217		12.36	-0.0202
12.37	-0.0597		12.39	-0.0359		12.37	-0.025		12.37	-0.0227		12.37	-0.0216
12.38	-0.0662		12.4	-0.0365		12.38	-0.0258		12.38	-0.0236		12.38	-0.0226
12.38	-0.0706		12.4	-0.037		12.39	-0.0267		12.38	-0.0244		12.39	-0.0233
12.39	-0.0741		12.4	-0.0377		12.4	-0.0275		12.39	-0.0252		12.39	-0.0239
12.4	-0.0842		12.41	-0.0383		12.4	-0.0282		12.4	-0.0259		12.4	-0.0244
12.4	-0.0164		12.42	-0.0389		12.41	-0.0289		12.41	-0.0266		12.41	-0.0249
12.41	-0.0054		12.42	-0.0395		12.42	-0.0295		12.42	-0.0272		12.42	-0.0254
12.42	-0.0037		12.43	-0.0402		12.43	-0.0301		12.43	-0.0278		12.43	-0.0259
12.42	0.0641		12.44	-0.0409		12.44	-0.0306		12.44	-0.0284		12.44	-0.0263
12.43	0.0414		12.45	-0.0416		12.45	-0.0311		12.44	-0.029		12.44	-0.0266
12.43	0.0409		12.45	-0.0424		12.45	-0.0316		12.45	-0.0297		12.45	-0.0269
12.44	0.0407		12.46	-0.0432		12.46	-0.0322		12.46	-0.0305		12.46	-0.0272
12.45	0.0401		12.47	-0.0441		12.47	-0.0329		12.47	-0.0314		12.47	-0.0275
12.46	0.0395		12.48	-0.0451		12.48	-0.0336		12.48	-0.0325		12.48	-0.0278
12.47	0.0392		12.49	-0.0461		12.49	-0.0345		12.48	-0.0339		12.49	-0.0281
12.48	0.0389		12.5	-0.0471		12.5	-0.0357		12.49	-0.0356		12.49	-0.0284
12.48	0.0387		12.5	-0.0481		12.5	-0.037		12.5	-0.0379		12.5	-0.0288
12.49	0.0384		12.51	-0.0489		12.51	-0.0389		12.51	-0.0407		12.51	-0.0291
12.5	0.0383		12.52	-0.0497		12.52	-0.0413		12.52	-0.0435		12.52	-0.0296
12.51	0.0382		12.53	-0.0232		12.53	-0.0437		12.52	-0.0137		12.53	-0.0303
12.52	0.0381		12.54	-0.0052		12.53	-0.0126		12.53	-0.0049		12.54	-0.0312
12.53	0.038		12.55	-0.0037		12.54	-0.0041		12.54	-0.0036		12.54	-0.0325
12.53	0.0379		12.55	0.0271		12.55	-0.0029		12.54	0.0222		12.55	-0.0341
12.54	0.038		12.56	0.0356		12.55	0.0248		12.54	0.0261		12.55	-0.0086
12.55	0.0379		12.57	0.0376		12.55	0.0302		12.55	0.0266		12.56	-0.0029
12.56	0.0379		12.58	0.038		12.56	0.0309		12.56	0.027		12.57	-0.002
12.57	0.038		12.59	0.0382		12.57	0.0309		12.57	0.027		12.57	-0.0017
12.58	0.038		12.6	0.0384		12.58	0.0308		12.58	0.027		12.58	0.0261
12.58	0.038		12.6	0.0386		12.59	0.0305		12.59	0.0269		12.59	0.0261
12.59	0.038		12.61	0.0388		12.6	0.0303		12.59	0.0268		12.59	0.0259
12.6	0.038		12.62	0.0389		12.6	0.0301		12.6	0.0266		12.6	0.0257
12.61	0.038		12.62	0.0389		12.61	0.0299		12.61	0.0265		12.61	0.0256
12.62	0.038		12.63	0.039		12.62	0.0298		12.62	0.0263		12.62	0.0254
12.62	0.0116		12.64	0.039		12.63	0.0295		12.63	0.0261		12.63	0.0254
12.63	0.0047		12.64	0.0391		12.64	0.0291		12.63	0.026		12.64	0.0254
12.63	0.0033		12.65	0.0391		12.65	0.0289		12.64	0.0258		12.64	0.0253
12.63	0.0027		12.65	0.0392		12.65	0.0287		12.65	0.0257		12.65	0.0252
12.64	-0.0254		12.66	0.0392		12.66	0.0287		12.66	0.0256		12.66	0.0252
12.65	-0.0281		12.67	0.0392		12.67	0.0291		12.67	0.0255		12.67	0.0251
12.66	-0.0298		12.68	0.0393		12.68	0.029		12.68	0.0256		12.68	0.0251
12.67	-0.031		12.69	0.0394		12.69	0.0288		12.69	0.0255		12.69	0.0251
12.68	-0.0319		12.7	0.0395		12.7	0.0287		12.69	0.0255		12.69	0.0251
12.68	-0.0328		12.7	0.0396		12.7	0.0286		12.7	0.0256		12.7	0.0251
12.69	-0.0337		12.71	0.0397		12.71	0.0285		12.71	0.0257		12.71	0.0251
12.7	-0.0346		12.72	0.0397		12.72	0.0285		12.72	0.0257		12.72	0.0251
12.71	-0.0355		12.73	0.0398		12.73	0.0285		12.73	0.0257		12.73	0.0251
12.72	-0.0365		12.74	0.0398		12.74	0.0285		12.73	0.0257		12.74	0.0251
12.73	-0.0373		12.75	0.011		12.75	0.0284		12.73	0.0098		12.74	0.0251
12.73	-0.0383		12.75	0.0039		12.75	0.0092		12.74	0.004		12.75	0.0251
12.74	-0.0394		12.76	0.0026		12.75	0.0033		12.75	0.003		12.76	0.0251
12.75	-0.0407		12.77	-0.0221		12.76	0.0022		12.75	-0.01		12.77	0.0252
12.76	-0.0421		12.78	-0.0291		12.76	-0.0144		12.76	-0.0147		12.77	0.0059
12.77	-0.0441		12.79	-0.0319		12.77	-0.0188		12.77	-0.0172		12.78	0.0024
12.78	-0.0465		12.8	-0.0337		12.78	-0.0209		12.78	-0.0191		12.79	0.0016
12.78	-0.0498		12.8	-0.0348		12.79	-0.0226		12.79	-0.0206		12.79	-0.0163
12.79	-0.0539		12.81	-0.0355		12.8	-0.0237		12.79	-0.0218		12.79	-0.0201
12.8	-0.0597		12.82	-0.0361		12.8	-0.0246		12.8	-0.0227		12.8	-0.0216
12.81	-0.0667		12.83	-0.0367		12.81	-0.0254		12.81	-0.0237		12.81	-0.0225
12.82	-0.0706		12.84	-0.0373		12.82	-0.0262		12.82	-0.0245		12.82	-0.0232
12.83	-0.0728		12.84	-0.0379		12.83	-0.0271		12.83	-0.0253		12.83	-0.0238
12.83	-0.0732		12.85	-0.0385		12.84	-0.0278		12.84	-0.026		12.84	-0.0244
12.83	-0.0162		12.85	-0.0391		12.85	-0.0284		12.84	-0.0267		12.84	-0.0249
12.84	-0.0054		12.85	-0.0398		12.85	-0.0291		12.85	-0.0273		12.85	-0.0254
12.85	-0.0038		12.86	-0.0404		12.86	-0.0297		12.86	-0.0279		12.86	-0.0258
12.85	0.0546		12.87	-0.0411		12.87	-0.0302		12.87	-0.0285		12.87	-0.0261
12.86	0.0414		12.88	-0.0418		12.88	-0.0307		12.88	-0.0291		12.88	-0.0265
12.87	0.0409		12.89	-0.0426		12.89	-0.0313		12.88	-0.0298		12.89	-0.0268
12.88	0.0404		12.9	-0.0434		12.9	-0.0319		12.89	-0.0306		12.89	-0.0271
12.88	0.0401		12.9	-0.0443		12.9	-0.0325		12.9	-0.0315		12.9	-0.0274
12.89	0.0396		12.91	-0.0451		12.91	-0.0333		12.91	-0.0325		12.91	-0.0276
12.9	0.0392		12.92	-0.046		12.92	-0.0341		12.92	-0.0338		12.92	-0.028
12.91	0.0389		12.93	-0.0469		12.93	-0.0352		12.93	-0.0356		12.93	-0.0283
12.92	0.0385		12.94	-0.0478		12.94	-0.0367		12.94	-0.0379		12.94	-0.0286
12.93	0.0383		12.95	-0.0487		12.95	-0.0385		12.94	-0.0406		12.94	-0.029
12.93	0.038		12.95	-0.0494		12.95	-0.0409		12.95	-0.0433		12.95	-0.0295
12.94	0.0379		12.96	-0.0144		12.96	-0.0434		12.95	-0.0136		12.96	-0.0301
12.95	0.0377		12.97	-0.0052		12.96	-0.0126		12.96	-0.0049		12.97	-0.0311
12.96	0.0375		12.98	-0.0037		12.97	-0.0041		12.97	-0.0036		12.98	-0.0323
12.97	0.0375		12.99	0.0255		12.98	-0.0028		12.97	0.0223		12.99	-0.034
12.98	0.0374		13	0.0353		12.98	0.0244		12.98	0.026		12.99	-0.0076
12.98	0.0372		13	0.0373		12.99	0.0297		12.98	0.0266		12.99	-0.0029
12.99	0.0372		13.01	0.0377		13	0.0303		12.99	0.027		13	-0.002
13	0.0371		13.02	0.0379		13	0.0304		13	0.027		13	0.0229
13.01	0.037		13.03	0.0381		13.01	0.0302		13.01	0.0271		13.01	0.026
13.02	0.037		13.04	0.0383		13.02	0.0298		13.02	0.027		13.02	0.0261
13.03	0.037		13.05	0.0385		13.03	0.0296		13.03	0.0268		13.03	0.0259
13.03	0.037		13.05	0.0386		13.04	0.0293		13.04	0.0267		13.04	0.0257
13.04	0.0371		13.05	0.0387		13.05	0.029		13.04	0.0266		13.04	0.0255
13.05	0.0371		13.06	0.0388		13.05	0.0289		13.05	0.0264		13.05	0.0254
13.05	0.0117		13.07	0.0388		13.06	0.0287		13.06	0.0262		13.06	0.0254
13.06	0.0048		13.07	0.0389		13.07	0.0285		13.07	0.0261		13.07	0.0253
13.07	0.0033		13.08	0.0389		13.08	0.0286		13.08	0.0259		13.08	0.0253
13.07	0.0029		13.09	0.039		13.09	0.0285		13.09	0.0258		13.09	0.0252
13.08	-0.0247		13.1	0.039		13.1	0.0284		13.09	0.0257		13.09	0.0251
13.08	-0.0274		13.1	0.0391		13.1	0.0284		13.1	0.0257		13.1	0.0252
13.09	-0.0291		13.11	0.0392		13.11	0.0284		13.11	0.0256		13.11	0.0251
13.1	-0.0303		13.12	0.0393		13.12	0.0284		13.12	0.0256		13.12	0.0251
13.11	-0.0312		13.13	0.0394		13.13	0.0284		13.13	0.0256		13.13	0.0251
13.12	-0.032		13.14	0.0395		13.14	0.0283		13.13	0.0257		13.14	0.0251
13.13	-0.033		13.15	0.0396		13.15	0.0284		13.14	0.0257		13.14	0.0251
13.13	-0.0339		13.15	0.0397		13.15	0.0286		13.15	0.0258		13.15	0.0251
13.14	-0.0348		13.16	0.0397		13.16	0.0287		13.16	0.0258		13.16	0.0251
13.15	-0.0356		13.17	0.0397		13.17	0.0288		13.17	0.0259		13.17	0.0251
13.16	-0.0366		13.18	0.0117		13.18	0.0287		13.17	0.0098		13.18	0.0251
13.17	-0.0377		13.19	0.0039		13.18	0.0092		13.18	0.0041		13.19	0.0251
13.18	-0.0388		13.2	0.0026		13.19	0.0033		13.19	0.003		13.19	0.0252
13.18	-0.0402		13.2	0.0021		13.2	0.0023		13.19	-0.0101		13.2	0.0252
13.19	-0.0418		13.21	-0.0289		13.2	-0.0142		13.19	-0.0148		13.2	0.006
13.2	-0.0438		13.22	-0.0317		13.2	-0.0186		13.2	-0.0173		13.21	0.0024
13.21	-0.046		13.23	-0.0335		13.21	-0.0206		13.21	-0.0192		13.22	0.0016
13.22	-0.049		13.24	-0.0346		13.22	-0.0223		13.22	-0.0207		13.22	0.0013
13.23	-0.0528		13.25	-0.0354		13.23	-0.0235		13.23	-0.0218		13.23	-0.0202
13.23	-0.0578		13.25	-0.036		13.24	-0.0244		13.23	-0.0229		13.24	-0.0216
13.24	-0.0631		13.26	-0.0366		13.25	-0.0254		13.24	-0.0238		13.24	-0.0226
13.25	-0.0682		13.27	-0.0372		13.25	-0.0263		13.25	-0.0246		13.25	-0.0233
13.26	-0.072		13.27	-0.0377		13.26	-0.0271		13.26	-0.0254		13.26	-0.0239
13.27	-0.073		13.28	-0.0383		13.27	-0.0279		13.27	-0.0261		13.27	-0.0244
13.27	-0.0163		13.29	-0.039		13.28	-0.0285		13.28	-0.0268		13.28	-0.0249
13.28	-0.0054		13.29	-0.0396		13.29	-0.0291		13.29	-0.0274		13.29	-0.0254
13.28	-0.0037		13.3	-0.0403		13.3	-0.0296		13.29	-0.028		13.29	-0.0259
13.28	-0.0033		13.3	-0.0409		13.3	-0.0302		13.3	-0.0287		13.3	-0.0262
13.29	0.0408		13.31	-0.0417		13.31	-0.0308		13.31	-0.0293		13.31	-0.0265
13.3	0.0406		13.32	-0.0424		13.32	-0.0314		13.32	-0.03		13.32	-0.0269
13.31	0.0405		13.33	-0.0432		13.33	-0.032		13.33	-0.0307		13.33	-0.0271
13.32	0.0403		13.34	-0.0442		13.34	-0.0327		13.34	-0.0316		13.34	-0.0274
13.33	0.04		13.35	-0.0452		13.35	-0.0335		13.34	-0.0327		13.34	-0.0277
13.33	0.0397		13.35	-0.0461		13.35	-0.0344		13.35	-0.034		13.35	-0.028
13.34	0.0393		13.36	-0.0469		13.36	-0.0355		13.36	-0.0357		13.36	-0.0284
13.35	0.0388		13.37	-0.0478		13.37	-0.0369		13.37	-0.0379		13.37	-0.0286
13.36	0.0385		13.38	-0.0487		13.38	-0.0387		13.38	-0.0406		13.38	-0.0291
13.37	0.0382		13.39	-0.0495		13.39	-0.0413		13.38	-0.0434		13.39	-0.0296
13.38	0.0381		13.4	-0.0146		13.4	-0.044		13.38	-0.0136		13.39	-0.0301
13.38	0.0379		13.4	-0.0053		13.4	-0.0127		13.39	-0.005		13.4	-0.0311
13.39	0.0378		13.41	-0.0038		13.4	-0.0042		13.4	-0.0036		13.41	-0.0324
13.4	0.0377		13.42	-0.0033		13.41	-0.0029		13.4	0.0222		13.42	-0.034
13.41	0.0377		13.43	0.0352		13.41	0.025		13.41	0.0261		13.42	-0.0076
13.42	0.0377		13.44	0.0371		13.42	0.0303		13.42	0.0267		13.43	-0.0029
13.43	0.0377		13.45	0.0376		13.43	0.0307		13.43	0.0271		13.44	-0.002
13.43	0.0377		13.45	0.0378		13.44	0.0306		13.44	0.0271		13.44	0.0216
13.44	0.0377		13.46	0.038		13.45	0.0303		13.44	0.0271		13.44	0.0261
13.45	0.0377		13.47	0.0382		13.45	0.0299		13.45	0.0271		13.45	0.0261
13.46	0.0377		13.48	0.0383		13.46	0.0297		13.46	0.0269		13.46	0.0259
13.47	0.0377		13.49	0.0385		13.47	0.0295		13.47	0.0268		13.47	0.0258
13.48	0.0378		13.49	0.0386		13.48	0.0293		13.48	0.0266		13.48	0.0256
13.48	0.0378		13.5	0.0386		13.49	0.0295		13.48	0.0264		13.49	0.0255
13.48	0.0118		13.5	0.0387		13.5	0.0293		13.49	0.0263		13.49	0.0254
13.49	0.0049		13.5	0.0388		13.5	0.0292		13.5	0.0261		13.5	0.0254
13.5	0.0034		13.51	0.0388		13.51	0.029		13.51	0.026		13.51	0.0254
13.5	0.0029		13.52	0.0388		13.52	0.0288		13.52	0.0259		13.52	0.0253
13.51	-0.0254		13.53	0.0389		13.53	0.0287		13.53	0.0258		13.53	0.0252
13.52	-0.0282		13.54	0.0389		13.54	0.0286		13.54	0.0257		13.54	0.0252
13.53	-0.0299		13.55	0.039		13.55	0.0287		13.54	0.0257		13.54	0.0252
13.53	-0.031		13.55	0.0391		13.55	0.0287		13.55	0.0257		13.55	0.0251
13.54	-0.0318		13.56	0.0392		13.56	0.0287		13.56	0.0257		13.56	0.0251
13.55	-0.0328		13.57	0.0393		13.57	0.0287		13.57	0.0257		13.57	0.0251
13.56	-0.0336		13.58	0.0395		13.58	0.0287		13.58	0.0258		13.58	0.0251
13.57	-0.0346		13.59	0.0396		13.59	0.0288		13.59	0.0259		13.59	0.0251
13.58	-0.0356		13.6	0.0396		13.6	0.0289		13.59	0.026		13.59	0.0251
13.58	-0.0365		13.6	0.0396		13.6	0.0289		13.6	0.0259		13.6	0.0251
13.59	-0.0374		13.61	0.0169		13.61	0.0288		13.6	0.0099		13.61	0.0251
13.6	-0.0384		13.62	0.004		13.61	0.0092		13.61	0.0041		13.62	0.0251
13.61	-0.0396		13.63	0.0026		13.62	0.0033		13.62	0.0031		13.63	0.0252
13.62	-0.0409		13.64	-0.0224		13.63	0.0023		13.62	-0.0101		13.64	0.0252
13.63	-0.0423		13.65	-0.0287		13.63	-0.0142		13.63	-0.0149		13.64	0.0062
13.63	-0.044		13.65	-0.0316		13.64	-0.019		13.63	-0.0174		13.64	0.0024
13.64	-0.0462		13.66	-0.0334		13.65	-0.0212		13.64	-0.0193		13.65	0.0017
13.65	-0.0489		13.67	-0.0345		13.65	-0.0227		13.65	-0.0208		13.65	0.0014
13.66	-0.0525		13.68	-0.0351		13.66	-0.0239		13.66	-0.0219		13.66	-0.0202
13.67	-0.0571		13.69	-0.0358		13.67	-0.0248		13.67	-0.023		13.67	-0.0216
13.68	-0.0625		13.7	-0.0363		13.68	-0.0257		13.68	-0.0239		13.68	-0.0226
13.68	-0.0673		13.7	-0.037		13.69	-0.0266		13.69	-0.0247		13.69	-0.0233
13.69	-0.0701		13.7	-0.0376		13.7	-0.0273		13.69	-0.0255		13.69	-0.0239
13.7	-0.0716		13.71	-0.0382		13.7	-0.0281		13.7	-0.0262		13.7	-0.0244
13.7	-0.0163		13.72	-0.0388		13.71	-0.0288		13.71	-0.0269		13.71	-0.0249
13.71	-0.0054		13.72	-0.0394		13.72	-0.0295		13.72	-0.0275		13.72	-0.0254
13.72	-0.0038		13.73	-0.0401		13.73	-0.03		13.73	-0.0281		13.73	-0.0258
13.72	0.0551		13.74	-0.0407		13.74	-0.0306		13.73	-0.0287		13.74	-0.0261
13.73	0.0413		13.75	-0.0415		13.75	-0.0312		13.74	-0.0293		13.74	-0.0265
13.73	0.0411		13.75	-0.0422		13.75	-0.0318		13.75	-0.03		13.75	-0.0268
13.74	0.0409		13.76	-0.043		13.76	-0.0324		13.76	-0.0308		13.76	-0.0271
13.75	0.0406		13.77	-0.044		13.77	-0.0331		13.77	-0.0317		13.77	-0.0274
13.76	0.0404		13.78	-0.045		13.78	-0.0338		13.78	-0.0327		13.78	-0.0276
13.77	0.0401		13.79	-0.046		13.79	-0.0348		13.79	-0.0341		13.79	-0.0279
13.78	0.0399		13.8	-0.047		13.8	-0.0359		13.79	-0.0358		13.79	-0.0283
13.78	0.0397		13.8	-0.0478		13.8	-0.0373		13.8	-0.0381		13.8	-0.0286
13.79	0.0395		13.81	-0.0488		13.81	-0.0391		13.81	-0.0408		13.81	-0.029
13.8	0.0393		13.82	-0.0496		13.82	-0.0415		13.82	-0.0438		13.82	-0.0294
13.81	0.0389		13.83	-0.0161		13.83	-0.0441		13.82	-0.0134		13.83	-0.0301
13.82	0.0387		13.84	-0.0052		13.83	-0.0127		13.83	-0.005		13.84	-0.0309
13.83	0.0383		13.85	-0.0037		13.84	-0.0042		13.84	-0.0037		13.84	-0.0322
13.83	0.0381		13.85	-0.0033		13.85	-0.0028		13.84	0.0223		13.85	-0.0339
13.84	0.038		13.86	0.0353		13.85	0.0249		13.84	0.0261		13.85	-0.008
13.85	0.0379		13.87	0.0373		13.85	0.03		13.85	0.0267		13.86	-0.0029
13.86	0.0378		13.88	0.0378		13.86	0.0305		13.86	0.0271		13.87	-0.002
13.87	0.0376		13.89	0.038		13.87	0.0304		13.87	0.0272		13.87	-0.0016
13.88	0.0377		13.9	0.0382		13.88	0.0303		13.88	0.0272		13.88	0.026
13.88	0.0376		13.9	0.0384		13.89	0.0302		13.88	0.0271		13.89	0.0261
13.89	0.0377		13.91	0.0386		13.9	0.03		13.89	0.027		13.89	0.0259
13.9	0.0377		13.92	0.0387		13.9	0.0297		13.9	0.0269		13.9	0.0257
13.91	0.0378		13.92	0.0388		13.91	0.0299		13.91	0.0267		13.91	0.0255
13.92	0.0379		13.93	0.0389		13.92	0.0297		13.92	0.0265		13.92	0.0254
13.92	0.0122		13.94	0.039		13.93	0.0296		13.93	0.0264		13.93	0.0254
13.93	0.0049		13.94	0.039		13.94	0.0294		13.94	0.0262		13.94	0.0253
13.93	0.0034		13.95	0.0391		13.95	0.0293		13.94	0.0261		13.94	0.0252
13.93	0.003		13.95	0.0391		13.95	0.0293		13.95	0.026		13.95	0.0251
13.94	-0.0253		13.96	0.0392		13.96	0.0292		13.96	0.0259		13.96	0.0251
13.95	-0.0282		13.97	0.0392		13.97	0.029		13.97	0.0258		13.97	0.0251
13.96	-0.0298		13.98	0.0393		13.98	0.0288		13.98	0.0258		13.98	0.0251
13.97	-0.0309		13.99	0.0394		13.99	0.0287		13.98	0.0258		13.99	0.0251
13.98	-0.0317		14	0.0395		14	0.0286		13.99	0.0258		13.99	0.0251
13.98	-0.0326		14	0.0396		14	0.0286		14	0.0259		14	0.0251
13.99	-0.0335		14.01	0.0397		14.01	0.0287		14.01	0.0259		14.01	0.0251
14	-0.0345		14.02	0.0399		14.02	0.0287		14.02	0.026		14.02	0.0251
14.01	-0.0355		14.03	0.04		14.03	0.0288		14.03	0.0261		14.03	0.0251
14.02	-0.0365		14.04	0.04		14.04	0.0289		14.04	0.0261		14.04	0.0251
14.03	-0.0374		14.05	0.0113		14.05	0.0289		14.04	0.0098		14.04	0.0251
14.03	-0.0384		14.05	0.004		14.05	0.0093		14.04	0.0042		14.05	0.0251
14.04	-0.0396		14.06	0.0027		14.05	0.0034		14.05	0.0031		14.06	0.0251
14.05	-0.0407		14.07	0.0022		14.06	0.0023		14.05	-0.0101		14.07	0.0251
14.06	-0.0421		14.08	-0.029		14.06	-0.0143		14.06	-0.0149		14.07	0.0067
14.07	-0.0439		14.09	-0.0319		14.07	-0.0191		14.07	-0.0174		14.08	0.0024
14.08	-0.0461		14.1	-0.0337		14.08	-0.0214		14.08	-0.0194		14.09	0.0016
14.08	-0.0489		14.1	-0.0348		14.09	-0.0229		14.09	-0.0209		14.09	0.0013
14.09	-0.0523		14.11	-0.0355		14.1	-0.024		14.09	-0.022		14.09	-0.0201
14.1	-0.0567		14.12	-0.0361		14.1	-0.0251		14.1	-0.0231		14.1	-0.0216
14.11	-0.0619		14.13	-0.0367		14.11	-0.026		14.11	-0.024		14.11	-0.0225
14.12	-0.0671		14.14	-0.0373		14.12	-0.027		14.12	-0.0248		14.12	-0.0231
14.13	-0.0701		14.14	-0.0379		14.13	-0.0279		14.13	-0.0256		14.13	-0.0237
14.13	-0.0709		14.15	-0.0385		14.14	-0.0287		14.13	-0.0263		14.14	-0.0243
14.13	-0.0164		14.15	-0.0391		14.15	-0.0294		14.14	-0.0269		14.14	-0.0248
14.14	-0.0054		14.15	-0.0397		14.15	-0.03		14.15	-0.0276		14.15	-0.0252
14.15	-0.0038		14.16	-0.0404		14.16	-0.0306		14.16	-0.0281		14.16	-0.0256
14.15	-0.0033		14.17	-0.0411		14.17	-0.0312		14.17	-0.0288		14.17	-0.026
14.16	0.0413		14.18	-0.0418		14.18	-0.0317		14.18	-0.0294		14.18	-0.0264
14.17	0.041		14.19	-0.0425		14.19	-0.0323		14.19	-0.03		14.19	-0.0266
14.18	0.0408		14.2	-0.0434		14.2	-0.0329		14.19	-0.0308		14.19	-0.0269
14.18	0.0404		14.2	-0.0443		14.2	-0.0336		14.2	-0.0317		14.2	-0.0272
14.19	0.0402		14.21	-0.0453		14.21	-0.0344		14.21	-0.0327		14.21	-0.0275
14.2	0.0399		14.22	-0.0463		14.22	-0.0354		14.22	-0.034		14.22	-0.0278
14.21	0.0397		14.23	-0.0473		14.23	-0.0365		14.23	-0.0356		14.23	-0.0281
14.22	0.0395		14.24	-0.0483		14.24	-0.0379		14.23	-0.0379		14.24	-0.0284
14.23	0.0392		14.25	-0.0492		14.25	-0.0397		14.24	-0.0406		14.24	-0.0289
14.23	0.039		14.25	-0.0501		14.25	-0.0421		14.25	-0.0436		14.25	-0.0293
14.24	0.0388		14.26	-0.0151		14.26	-0.0448		14.25	-0.0136		14.26	-0.0299
14.25	0.0387		14.27	-0.0053		14.26	-0.0125		14.26	-0.005		14.27	-0.0308
14.26	0.0384		14.28	-0.0038		14.27	-0.0042		14.27	-0.0037		14.28	-0.0321
14.27	0.0382		14.29	-0.0033		14.28	-0.0029		14.27	0.0223		14.29	-0.0339
14.28	0.0381		14.3	0.0359		14.28	0.0255		14.28	0.0261		14.29	-0.0085
14.28	0.038		14.3	0.0379		14.29	0.0305		14.29	0.0267		14.29	-0.0028
14.29	0.0379		14.31	0.0383		14.3	0.031		14.29	0.0272		14.3	-0.002
14.3	0.0378		14.32	0.0386		14.3	0.031		14.3	0.0272		14.3	-0.0016
14.31	0.0379		14.33	0.0388		14.31	0.0307		14.31	0.0273		14.31	0.0259
14.32	0.0381		14.34	0.039		14.32	0.0305		14.32	0.0272		14.32	0.026
14.33	0.0382		14.35	0.0392		14.33	0.0302		14.33	0.0271		14.33	0.0258
14.33	0.0384		14.35	0.0393		14.34	0.0301		14.34	0.0269		14.34	0.0256
14.34	0.0386		14.35	0.0395		14.35	0.0297		14.34	0.0267		14.34	0.0255
14.35	0.0387		14.36	0.0395		14.35	0.0295		14.35	0.0266		14.35	0.0254
14.35	0.0121		14.37	0.0396		14.36	0.0293		14.36	0.0264		14.36	0.0253
14.36	0.0049		14.37	0.0397		14.37	0.0292		14.37	0.0263		14.37	0.0253
14.37	0.0035		14.38	0.0397		14.38	0.029		14.38	0.0261		14.38	0.0252
14.37	0.0031		14.39	0.0398		14.39	0.0288		14.38	0.026		14.39	0.0251
14.38	-0.0262		14.4	0.0398		14.4	0.0286		14.39	0.026		14.39	0.0251
14.38	-0.0289		14.4	0.0399		14.4	0.0285		14.4	0.0259		14.4	0.0251
14.39	-0.0304		14.41	0.0399		14.41	0.0284		14.41	0.0258		14.41	0.0251
14.4	-0.0314		14.42	0.04		14.42	0.0282		14.42	0.0258		14.42	0.0251
14.41	-0.0322		14.43	0.0401		14.43	0.0282		14.43	0.0259		14.43	0.025
14.42	-0.033		14.44	0.0403		14.44	0.0283		14.44	0.0259		14.44	0.025
14.43	-0.0338		14.45	0.0404		14.45	0.0282		14.44	0.026		14.44	0.025
14.43	-0.0347		14.45	0.0404		14.45	0.0283		14.45	0.0261		14.45	0.025
14.44	-0.0356		14.46	0.0403		14.46	0.0283		14.46	0.0262		14.46	0.025
14.45	-0.0365		14.47	0.0403		14.47	0.0283		14.47	0.0262		14.47	0.025
14.46	-0.0373		14.48	0.0119		14.48	0.0283		14.47	0.0099		14.48	0.0251
14.47	-0.0385		14.49	0.004		14.48	0.0093		14.48	0.0042		14.49	0.0251
14.48	-0.0396		14.5	0.0027		14.49	0.0034		14.48	0.0031		14.49	0.0251
14.48	-0.0407		14.5	0.0022		14.5	0.0023		14.48	-0.0101		14.5	0.0251
14.49	-0.0423		14.51	-0.0292		14.5	-0.0139		14.49	-0.0149		14.5	0.0058
14.5	-0.0439		14.52	-0.0321		14.5	-0.0194		14.5	-0.0175		14.51	0.0024
14.51	-0.0462		14.53	-0.0338		14.51	-0.0215		14.51	-0.0195		14.52	0.0016
14.52	-0.0486		14.54	-0.0349		14.52	-0.0227		14.52	-0.021		14.52	-0.0164
14.53	-0.0519		14.55	-0.0356		14.53	-0.0239		14.53	-0.0221		14.53	-0.0201
14.53	-0.0563		14.55	-0.0362		14.54	-0.0251		14.54	-0.0231		14.54	-0.0216
14.54	-0.0617		14.56	-0.0368		14.55	-0.0262		14.54	-0.0241		14.54	-0.0225
14.55	-0.067		14.57	-0.0374		14.55	-0.0272		14.55	-0.0249		14.55	-0.0231
14.56	-0.0701		14.57	-0.0381		14.56	-0.0281		14.56	-0.0257		14.56	-0.0237
14.57	-0.0713		14.58	-0.0387		14.57	-0.0289		14.57	-0.0264		14.57	-0.0243
14.57	-0.0172		14.59	-0.0393		14.58	-0.0296		14.58	-0.027		14.58	-0.0248
14.58	-0.0054		14.59	-0.0399		14.59	-0.0303		14.59	-0.0277		14.59	-0.0252
14.58	-0.0038		14.6	-0.0406		14.6	-0.0309		14.59	-0.0283		14.59	-0.0256
14.58	-0.0034		14.6	-0.0413		14.6	-0.0314		14.6	-0.0288		14.6	-0.026
14.59	0.0415		14.61	-0.0421		14.61	-0.032		14.61	-0.0295		14.61	-0.0263
14.6	0.0413		14.62	-0.0429		14.62	-0.0325		14.62	-0.0302		14.62	-0.0266
14.61	0.0411		14.63	-0.0437		14.63	-0.0331		14.63	-0.0309		14.63	-0.0269
14.62	0.0409		14.64	-0.0446		14.64	-0.0338		14.63	-0.0317		14.64	-0.0272
14.63	0.0406		14.65	-0.0456		14.65	-0.0346		14.64	-0.0327		14.64	-0.0275
14.63	0.0404		14.65	-0.0465		14.65	-0.0355		14.65	-0.0341		14.65	-0.0278
14.64	0.0401		14.66	-0.0474		14.66	-0.0368		14.66	-0.0357		14.66	-0.0281
14.65	0.0399		14.67	-0.0484		14.67	-0.0382		14.67	-0.0379		14.67	-0.0284
14.66	0.0397		14.68	-0.0493		14.68	-0.0399		14.68	-0.0406		14.68	-0.0288
14.67	0.0396		14.69	-0.0501		14.69	-0.0423		14.69	-0.0435		14.69	-0.0293
14.68	0.0394		14.7	-0.0167		14.7	-0.0449		14.69	-0.0135		14.69	-0.0299
14.68	0.0392		14.7	-0.0053		14.7	-0.0127		14.69	-0.005		14.7	-0.0308
14.69	0.0391		14.71	-0.0038		14.7	-0.0042		14.7	-0.0037		14.71	-0.032
14.7	0.0389		14.72	0.0282		14.71	-0.0029		14.7	0.0222		14.72	-0.0337
14.71	0.0389		14.73	0.0362		14.71	0.0256		14.71	0.0261		14.72	-0.0075
14.72	0.0388		14.74	0.0383		14.72	0.0305		14.72	0.0267		14.73	-0.0028
14.73	0.0388		14.75	0.0388		14.73	0.0309		14.73	0.0271		14.74	-0.0019
14.73	0.0389		14.75	0.0391		14.74	0.0307		14.73	0.0272		14.74	0.0227
14.74	0.0388		14.76	0.0393		14.75	0.0306		14.74	0.0272		14.74	0.0259
14.75	0.0388		14.77	0.0395		14.75	0.0305		14.75	0.0272		14.75	0.0259
14.76	0.0386		14.78	0.0397		14.76	0.0303		14.76	0.0271		14.76	0.0258
14.77	0.0387		14.79	0.0399		14.77	0.0301		14.77	0.027		14.77	0.0256
14.78	0.0387		14.79	0.04		14.78	0.0298		14.78	0.0267		14.78	0.0254
14.78	0.0388		14.8	0.0401		14.79	0.0296		14.79	0.0266		14.79	0.0254
14.78	0.0131		14.8	0.0401		14.8	0.0295		14.79	0.0265		14.79	0.0253
14.79	0.005		14.8	0.0402		14.8	0.0293		14.8	0.0263		14.8	0.0252
14.8	0.0035		14.81	0.0402		14.81	0.0291		14.81	0.0262		14.81	0.0252
14.8	-0.0209		14.82	0.0403		14.82	0.0289		14.82	0.026		14.82	0.0251
14.81	-0.0262		14.83	0.0403		14.83	0.0289		14.83	0.0259		14.83	0.0251
14.82	-0.0291		14.84	0.0404		14.84	0.0288		14.84	0.0259		14.84	0.0251
14.83	-0.0307		14.85	0.0405		14.85	0.0287		14.84	0.0258		14.84	0.0251
14.83	-0.0317		14.85	0.0405		14.85	0.0288		14.85	0.0258		14.85	0.025
14.84	-0.0325		14.86	0.0406		14.86	0.0287		14.86	0.0259		14.86	0.025
14.85	-0.0335		14.87	0.0407		14.87	0.0287		14.87	0.0259		14.87	0.025
14.86	-0.0343		14.88	0.0408		14.88	0.0288		14.88	0.026		14.88	0.025
14.87	-0.0352		14.89	0.041		14.89	0.0288		14.88	0.0261		14.89	0.025
14.88	-0.0361		14.9	0.041		14.9	0.0288		14.89	0.0262		14.89	0.025
14.88	-0.0369		14.9	0.041		14.9	0.0289		14.9	0.0262		14.9	0.025
14.89	-0.0378		14.91	0.0114		14.91	0.0289		14.9	0.01		14.91	0.025
14.9	-0.0387		14.92	0.004		14.91	0.0092		14.91	0.0042		14.92	0.0251
14.91	-0.0397		14.93	0.0027		14.92	0.0034		14.92	0.0031		14.93	0.0251
14.92	-0.0408		14.94	0.0022		14.93	0.0024		14.92	-0.0101		14.94	0.0251
14.93	-0.0421		14.95	-0.0301		14.93	-0.0147		14.93	-0.0149		14.94	0.0061
14.93	-0.0438		14.95	-0.0329		14.94	-0.0194		14.94	-0.0175		14.94	0.0024
14.94	-0.046		14.96	-0.0347		14.95	-0.0215		14.94	-0.0194		14.95	0.0016
14.95	-0.0488		14.97	-0.0358		14.95	-0.0232		14.95	-0.0209		14.95	0.0013
14.96	-0.0522		14.98	-0.0365		14.96	-0.0244		14.96	-0.0221		14.96	-0.0201
14.97	-0.0568		14.99	-0.0371		14.97	-0.0254		14.97	-0.0231		14.97	-0.0216
14.98	-0.0621		15	-0.0377		14.98	-0.0263		14.98	-0.0241		14.98	-0.0224
14.98	-0.0673		15	-0.0382		14.99	-0.0273		14.98	-0.0249		14.99	-0.0231
14.99	-0.071		15	-0.0389		15	-0.0282		14.99	-0.0257		14.99	-0.0237
15	-0.0722		15.01	-0.0395		15	-0.029		15	-0.0264		15	-0.0242
15	-0.0188		15.02	-0.0402		15.01	-0.0297		15.01	-0.027		15.01	-0.0247
15.01	-0.0054		15.02	-0.0408		15.02	-0.0303		15.02	-0.0276		15.02	-0.0251
15.02	-0.0038		15.03	-0.0414		15.03	-0.0309		15.03	-0.0282		15.03	-0.0256
15.02	-0.0033		15.04	-0.042		15.04	-0.0315		15.04	-0.0288		15.04	-0.0259
15.03	0.0418		15.05	-0.0428		15.05	-0.0321		15.04	-0.0294		15.04	-0.0262
15.03	0.0415		15.05	-0.0435		15.05	-0.0327		15.05	-0.0301		15.05	-0.0266
15.04	0.0413		15.06	-0.0443		15.06	-0.0333		15.06	-0.0309		15.06	-0.0269
15.05	0.0409		15.07	-0.0452		15.07	-0.0341		15.07	-0.0317		15.07	-0.0271
15.06	0.0406		15.08	-0.0462		15.08	-0.0348		15.08	-0.0328		15.08	-0.0274
15.07	0.0403		15.09	-0.0472		15.09	-0.0357		15.09	-0.0341		15.09	-0.0277
15.08	0.0401		15.1	-0.0481		15.1	-0.0369		15.09	-0.0356		15.09	-0.028
15.08	0.0398		15.1	-0.0491		15.1	-0.0382		15.1	-0.0378		15.1	-0.0284
15.09	0.0395		15.11	-0.0499		15.11	-0.04		15.11	-0.0404		15.11	-0.0287
15.1	0.0392		15.12	-0.0507		15.12	-0.0424		15.12	-0.0433		15.12	-0.0292
15.11	0.039		15.13	-0.0144		15.13	-0.0451		15.12	-0.0134		15.13	-0.0298
15.12	0.0389		15.14	-0.0053		15.13	-0.0124		15.13	-0.005		15.14	-0.0306
15.13	0.0387		15.15	-0.0038		15.14	-0.0042		15.13	-0.0037		15.14	-0.032
15.13	0.0385		15.15	0.0266		15.15	-0.0029		15.13	0.0222		15.15	-0.0337
15.14	0.0383		15.16	0.0363		15.15	0.0257		15.14	0.026		15.15	-0.0076
15.15	0.0383		15.17	0.0385		15.15	0.0305		15.15	0.0267		15.16	-0.0028
15.16	0.0382		15.18	0.039		15.16	0.0312		15.16	0.027		15.17	-0.002
15.17	0.0383		15.19	0.0392		15.17	0.0315		15.17	0.0272		15.17	0.0214
15.18	0.0384		15.2	0.0394		15.18	0.0313		15.18	0.0272		15.18	0.0259
15.18	0.0385		15.2	0.0396		15.19	0.0312		15.19	0.0272		15.19	0.0259
15.19	0.0388		15.21	0.0399		15.2	0.0311		15.19	0.0271		15.19	0.0258
15.2	0.0389		15.22	0.04		15.2	0.0309		15.2	0.0269		15.2	0.0256
15.21	0.039		15.22	0.0401		15.21	0.0308		15.21	0.0268		15.21	0.0255
15.22	0.039		15.23	0.0402		15.22	0.0306		15.22	0.0266		15.22	0.0254
15.22	0.0116		15.24	0.0403		15.23	0.0306		15.23	0.0264		15.23	0.0253
15.23	0.005		15.24	0.0403		15.24	0.0305		15.23	0.0263		15.24	0.0252
15.23	0.0036		15.25	0.0404		15.25	0.0303		15.24	0.0261		15.24	0.0252
15.23	-0.021		15.25	0.0404		15.25	0.0302		15.25	0.026		15.25	0.0251
15.24	-0.0265		15.26	0.0405		15.26	0.0299		15.26	0.0259		15.26	0.0251
15.25	-0.0293		15.27	0.0405		15.27	0.0297		15.27	0.0259		15.27	0.0251
15.26	-0.0309		15.28	0.0406		15.28	0.0296		15.28	0.0258		15.28	0.0251
15.27	-0.0319		15.29	0.0407		15.29	0.0296		15.29	0.0259		15.29	0.0251
15.28	-0.0328		15.3	0.0408		15.3	0.0295		15.29	0.0259		15.29	0.025
15.28	-0.0337		15.3	0.0409		15.3	0.0295		15.3	0.026		15.3	0.025
15.29	-0.0345		15.31	0.0411		15.31	0.0294		15.31	0.0261		15.31	0.025
15.3	-0.0353		15.32	0.0412		15.32	0.0294		15.32	0.0262		15.32	0.025
15.31	-0.0361		15.33	0.0413		15.33	0.0295		15.33	0.0263		15.33	0.025
15.32	-0.037		15.34	0.0413		15.34	0.0295		15.34	0.0263		15.34	0.025
15.33	-0.0378		15.35	0.0114		15.35	0.0295		15.34	0.01		15.34	0.025
15.33	-0.0388		15.35	0.004		15.35	0.0093		15.34	0.0043		15.35	0.0251
15.34	-0.0399		15.36	0.0027		15.35	0.0034		15.35	0.0032		15.36	0.0251
15.35	-0.0411		15.37	0.0022		15.36	0.0024		15.35	-0.0101		15.37	0.0251
15.36	-0.0424		15.38	-0.0302		15.36	-0.015		15.36	-0.0149		15.37	0.0061
15.37	-0.044		15.39	-0.033		15.37	-0.0203		15.37	-0.0175		15.38	0.0024
15.38	-0.046		15.4	-0.0349		15.38	-0.0226		15.38	-0.0195		15.39	0.0016
15.38	-0.049		15.4	-0.0359		15.39	-0.0242		15.38	-0.021		15.39	0.0013
15.39	-0.0524		15.41	-0.0366		15.4	-0.0257		15.39	-0.0222		15.39	-0.0201
15.4	-0.0571		15.42	-0.0372		15.4	-0.0267		15.4	-0.0232		15.4	-0.0216
15.41	-0.0628		15.43	-0.0378		15.41	-0.0278		15.41	-0.0241		15.41	-0.0224
15.42	-0.0685		15.44	-0.0384		15.42	-0.0287		15.42	-0.025		15.42	-0.0231
15.43	-0.0721		15.44	-0.039		15.43	-0.0296		15.43	-0.0258		15.43	-0.0237
15.43	-0.0737		15.45	-0.0396		15.44	-0.0305		15.44	-0.0265		15.44	-0.0242
15.43	-0.0162		15.45	-0.0402		15.45	-0.0312		15.44	-0.0271		15.44	-0.0247
15.44	-0.0053		15.45	-0.0408		15.45	-0.0318		15.45	-0.0277		15.45	-0.0251
15.45	-0.0037		15.46	-0.0414		15.46	-0.0322		15.46	-0.0282		15.46	-0.0256
15.45	0.0557		15.47	-0.0421		15.47	-0.0328		15.47	-0.0288		15.47	-0.0259
15.46	0.0421		15.48	-0.0429		15.48	-0.0332		15.48	-0.0295		15.48	-0.0262
15.47	0.0421		15.49	-0.0436		15.49	-0.0337		15.48	-0.0301		15.49	-0.0265
15.48	0.0419		15.5	-0.0444		15.5	-0.0343		15.49	-0.0308		15.49	-0.0269
15.48	0.0417		15.5	-0.0453		15.5	-0.0349		15.5	-0.0317		15.5	-0.0271
15.49	0.041		15.51	-0.0462		15.51	-0.0356		15.51	-0.0327		15.51	-0.0274
15.5	0.0407		15.52	-0.0472		15.52	-0.0365		15.52	-0.0339		15.52	-0.0276
15.51	0.0406		15.53	-0.0482		15.53	-0.0378		15.53	-0.0356		15.53	-0.028
15.52	0.0404		15.54	-0.0491		15.54	-0.0391		15.54	-0.0377		15.54	-0.0283
15.53	0.0402		15.55	-0.05		15.55	-0.0409		15.54	-0.0404		15.54	-0.0287
15.53	0.04		15.55	-0.0508		15.55	-0.0432		15.55	-0.0434		15.55	-0.0291
15.54	0.0398		15.56	-0.015		15.56	-0.0459		15.55	-0.0133		15.56	-0.0298
15.55	0.0396		15.57	-0.0053		15.56	-0.0122		15.56	-0.005		15.57	-0.0306
15.56	0.0396		15.58	-0.0038		15.57	-0.0042		15.57	-0.0037		15.58	-0.0319
15.57	0.0395		15.59	-0.0033		15.58	-0.0029		15.57	0.0223		15.59	-0.0336
15.58	0.0394		15.6	0.0364		15.58	0.0272		15.58	0.026		15.59	-0.0076
15.58	0.0394		15.6	0.0386		15.59	0.0321		15.59	0.0267		15.59	-0.0028
15.59	0.0394		15.61	0.0391		15.6	0.0326		15.59	0.0271		15.6	-0.0019
15.6	0.0394		15.62	0.0394		15.6	0.0321		15.6	0.0273		15.6	-0.0016
15.61	0.0394		15.63	0.0396		15.61	0.0319		15.61	0.0273		15.61	0.0259
15.62	0.0395		15.64	0.0398		15.62	0.032		15.62	0.0273		15.62	0.0259
15.63	0.0395		15.65	0.04		15.63	0.0317		15.63	0.0271		15.63	0.0258
15.63	0.0397		15.65	0.0402		15.64	0.0314		15.63	0.027		15.64	0.0256
15.64	0.0398		15.65	0.0403		15.65	0.0309		15.64	0.0268		15.64	0.0255
15.65	0.0398		15.66	0.0404		15.65	0.0306		15.65	0.0267		15.65	0.0254
15.65	0.0125		15.67	0.0405		15.66	0.0304		15.66	0.0265		15.66	0.0253
15.66	0.005		15.67	0.0405		15.67	0.0303		15.67	0.0264		15.67	0.0253
15.67	0.0036		15.68	0.0406		15.68	0.0301		15.68	0.0262		15.68	0.0252
15.67	0.0031		15.69	0.0406		15.69	0.03		15.69	0.0261		15.69	0.0251
15.68	-0.0272		15.7	0.0407		15.7	0.0298		15.69	0.026		15.69	0.0251
15.68	-0.0299		15.7	0.0407		15.7	0.0297		15.7	0.026		15.7	0.0251
15.69	-0.0314		15.71	0.0408		15.71	0.0295		15.71	0.0259		15.71	0.0251
15.7	-0.0323		15.72	0.0409		15.72	0.0294		15.72	0.0259		15.72	0.025
15.71	-0.0331		15.73	0.041		15.73	0.0293		15.73	0.026		15.73	0.025
15.72	-0.0339		15.74	0.0411		15.74	0.0292		15.73	0.026		15.74	0.025
15.73	-0.0348		15.75	0.0412		15.75	0.0291		15.74	0.0261		15.74	0.025
15.73	-0.0357		15.75	0.0414		15.75	0.029		15.75	0.0263		15.75	0.025
15.74	-0.0367		15.76	0.0415		15.76	0.029		15.76	0.0263		15.76	0.025
15.75	-0.0377		15.77	0.0414		15.77	0.0292		15.77	0.0264		15.77	0.025
15.76	-0.0387		15.78	0.0111		15.78	0.0293		15.77	0.0099		15.78	0.025
15.77	-0.0398		15.79	0.0041		15.78	0.0093		15.78	0.0043		15.79	0.0251
15.78	-0.0409		15.8	0.0027		15.79	0.0034		15.79	0.0032		15.79	0.0251
15.78	-0.042		15.8	-0.0231		15.8	0.0024		15.79	-0.0101		15.8	0.0251
15.79	-0.0436		15.81	-0.0304		15.8	-0.0147		15.79	-0.015		15.8	0.0064
15.8	-0.0453		15.82	-0.0332		15.8	-0.0196		15.8	-0.0176		15.81	0.0024
15.81	-0.0473		15.83	-0.035		15.81	-0.022		15.81	-0.0196		15.82	0.0016
15.82	-0.0502		15.84	-0.036		15.82	-0.0239		15.82	-0.0211		15.82	0.0014
15.83	-0.0532		15.85	-0.0367		15.83	-0.0252		15.83	-0.0223		15.83	-0.0201
[truncated: 2,333 more rows]

## Sheet: Fig.1(e)
	ZSO+Cl	ZSO+Br	ZSO+I
(5,1)	99.84	99.82	99.73
(10,5)	99.83	99.75	99.49
(20,10)	99.8	99.71	99.41

## Sheet: Fig.1(f)
	ZSO+Cl			ZSO+Br			ZSO+I
time(h)	voltage(V)		time(h)	voltage(V)		time(h)	voltage(V)
0	0.0048		0	0.0099
0.01	0.005		0.01	0.0108		0	0.0108
0.02	0.0053		0.02	0.0108		0.01	0.0109
0.03	0.0054		0.03	0.0115		0.02	0.0108
0.03	0.0058		0.03	0.0105		0.03	0.0108
0.04	0.0053		0.04	0.0098		0.03	0.0108
0.05	0.0061		0.05	0.0109		0.04	0.0107
0.06	0.0061		0.06	0.0099		0.05	0.01
0.07	0.0063		0.07	0.0113		0.06	0.0102
0.07	0.0058		0.07	0.0114		0.07	0.0103
0.08	0.0063		0.08	0.011		0.07	0.0103
0.08	-0.1896		0.08	-0.2063		0.08	0.0103
0.09	-0.1032		0.09	-0.082		0.08	0.0105
0.1	-0.095		0.1	-0.0736		0.09	-0.0614
0.11	-0.0902		0.11	-0.0691		0.1	-0.0562
0.12	-0.0868		0.12	-0.066		0.11	-0.0532
0.12	-0.0842		0.12	-0.064		0.12	-0.0513
0.13	-0.0822		0.13	-0.0621		0.12	-0.0498
0.14	-0.0805		0.14	-0.0607		0.13	-0.0486
0.15	-0.0791		0.15	-0.0595		0.14	-0.0477
0.16	-0.0779		0.16	-0.0585		0.15	-0.0469
0.17	-0.0768		0.17	-0.0578		0.16	-0.0462
0.17	-0.0758		0.17	-0.0568		0.17	-0.0456
0.18	-0.075		0.18	-0.0562		0.17	-0.045
0.19	-0.0742		0.19	-0.0555		0.18	-0.0445
0.2	-0.0735		0.2	-0.0551		0.19	-0.0441
0.21	-0.0728		0.21	-0.0543		0.2	-0.0437
0.22	-0.0722		0.22	-0.054		0.21	-0.0432
0.23	-0.0717		0.23	-0.0536		0.22	-0.0429
0.23	-0.0712		0.23	-0.0531		0.23	-0.0426
0.24	-0.0708		0.24	-0.0528		0.23	-0.0423
0.25	-0.0704		0.25	-0.0523		0.24	-0.042
0.26	-0.07		0.26	-0.052		0.25	-0.0417
0.27	-0.0698		0.27	-0.0519		0.26	-0.0414
0.28	-0.0695		0.28	-0.0516		0.27	-0.0412
0.28	-0.0694		0.28	-0.0513		0.28	-0.041
0.29	-0.0694		0.29	-0.0511		0.28	-0.0408
0.3	-0.0693		0.3	-0.051		0.29	-0.0406
0.31	-0.0694		0.31	-0.0508		0.3	-0.0404
0.32	-0.0695		0.32	-0.0508		0.31	-0.0402
0.33	-0.0696		0.33	-0.0507		0.32	-0.04
0.33	-0.0698		0.33	-0.0506		0.33	-0.0399
0.34	-0.07		0.34	-0.0504		0.33	-0.0397
0.35	-0.0702		0.35	-0.0503		0.34	-0.0396
0.36	-0.0704		0.36	-0.0503		0.35	-0.0394
0.37	-0.0706		0.37	-0.0502		0.36	-0.0393
0.38	-0.0708		0.38	-0.0501		0.37	-0.0392
0.38	-0.0709		0.38	-0.05		0.38	-0.0391
0.39	-0.0711		0.39	-0.0499		0.38	-0.039
0.4	-0.0712		0.4	-0.05		0.39	-0.0389
0.41	-0.0713		0.41	-0.0498		0.4	-0.0388
0.42	-0.0713		0.42	-0.0498		0.41	-0.0388
0.42	-0.0714		0.42	-0.0499		0.42	-0.0387
0.43	-0.0714		0.43	-0.0499		0.42	-0.0387
0.44	-0.0714		0.44	-0.0498		0.43	-0.0386
0.45	-0.0715		0.45	-0.0498		0.44	-0.0386
0.46	-0.0715		0.46	-0.0496		0.45	-0.0385
0.47	-0.0714		0.47	-0.0496		0.46	-0.0385
0.47	-0.0715		0.47	-0.0495		0.47	-0.0384
0.48	-0.0714		0.48	-0.0496		0.47	-0.0385
0.49	-0.0714		0.49	-0.0496		0.48	-0.0384
0.5	-0.0713		0.5	-0.0496		0.49	-0.0384
0.51	-0.0713		0.51	-0.0494		0.5	-0.0384
0.52	-0.0712		0.52	-0.0494		0.51	-0.0384
0.53	-0.0712		0.53	-0.0494		0.52	-0.0384
0.53	-0.0711		0.53	-0.0495		0.53	-0.0384
0.54	-0.071		0.54	-0.0495		0.53	-0.0385
0.55	-0.071		0.55	-0.0495		0.54	-0.0384
0.56	-0.0709		0.56	-0.0494		0.55	-0.0385
0.57	-0.0708		0.57	-0.0494		0.56	-0.0385
0.57	-0.0708		0.57	-0.0496		0.57	-0.0385
0.58	-0.0707		0.58	-0.0494		0.57	-0.0386
0.58	-0.0258		0.58	-0.0168		0.58	-0.0386
0.59	-0.0081		0.59	-0.0059		0.58	-0.0129
0.6	-0.0065		0.6	-0.0049		0.59	-0.005
0.6	0.0371		0.6	0.0226		0.6	-0.0044
0.61	0.0518		0.61	0.034		0.6	0.0021
0.62	0.0552		0.62	0.0371		0.61	0.029
0.62	0.0568		0.62	0.0386		0.62	0.03
0.63	0.057		0.63	0.0396		0.62	0.0303
0.64	0.0573		0.64	0.0401		0.63	0.0305
0.65	0.0574		0.65	0.0406		0.64	0.0307
0.66	0.0574		0.66	0.041		0.65	0.0309
0.67	0.0573		0.67	0.0407		0.66	0.031
0.67	0.0571		0.68	0.041		0.67	0.0312
0.68	0.0568		0.68	0.0412		0.67	0.0312
0.69	0.0566		0.69	0.0413		0.68	0.0313
0.7	0.0564		0.7	0.0413		0.69	0.0313
0.71	0.0562		0.71	0.0416		0.7	0.0313
0.72	0.0561		0.72	0.0416		0.71	0.0313
0.72	0.056		0.72	0.0418		0.72	0.0313
0.73	0.0559		0.73	0.0419		0.72	0.0314
0.74	0.0553		0.74	0.0415		0.73	0.0314
0.75	0.0552		0.75	0.0415		0.74	0.0314
0.76	0.0552		0.76	0.0417		0.75	0.0314
0.77	0.0552		0.77	0.0418		0.76	0.0315
0.77	0.0552		0.78	0.0419		0.77	0.0315
0.78	0.0552		0.78	0.0418		0.77	0.0316
0.79	0.0553		0.79	0.0419		0.78	0.0316
0.8	0.0555		0.8	0.0421		0.79	0.0317
0.81	0.0556		0.81	0.0422		0.8	0.0318
0.82	0.0557		0.82	0.0424		0.81	0.0318
0.82	0.0559		0.82	0.0425		0.82	0.0319
0.83	0.0561		0.83	0.0428		0.82	0.0319
0.84	0.0563		0.84	0.0426		0.83	0.0321
0.85	0.0565		0.85	0.043		0.84	0.0321
0.86	0.0567		0.86	0.0433		0.85	0.0323
0.87	0.057		0.87	0.0436		0.86	0.0324
0.87	0.0573		0.88	0.0441		0.87	0.0325
0.88	0.0576		0.88	0.0445		0.87	0.0326
0.89	0.058		0.89	0.045		0.88	0.0328
0.9	0.0584		0.9	0.0455		0.89	0.0329
0.91	0.0589		0.91	0.0462		0.9	0.0331
0.92	0.0595		0.92	0.0471		0.91	0.0333
0.92	0.0601		0.93	0.048		0.92	0.0336
0.93	0.0608		0.93	0.0492		0.92	0.0338
0.94	0.0617		0.94	0.0508		0.93	0.0341
0.95	0.0628		0.95	0.0526		0.94	0.0344
0.96	0.0644		0.96	0.0549		0.95	0.0348
0.97	0.0663		0.97	0.0574		0.96	0.0352
0.97	0.0688		0.97	0.0602		0.97	0.0356
0.98	0.072		0.98	0.0628		0.97	0.0361
0.99	0.0759		0.99	0.0653		0.98	0.0367
1	0.0801		1	0.0676		0.99	0.0374
1.01	0.0838		1.01	0.069		1	0.0382
1.02	0.0866		1.02	0.0709		1.01	0.0392
1.02	0.0889		1.02	0.0726		1.02	0.0405
1.03	0.0911		1.03	0.0741		1.02	0.0422
1.04	0.0932		1.04	0.075		1.03	0.0444
1.05	0.0949		1.05	0.0756		1.04	0.0474
1.06	0.096		1.06	0.0758		1.05	0.051
1.07	0.0961		1.07	0.0752		1.06	0.0538
1.07	0.0949		1.07	0.0741		1.07	0.0545
1.08	0.0927		1.08	0.073		1.07	0.0538
1.09	0.0905		1.09	0.0717		1.08	0.0528
1.1	0.0885		1.1	0.0707		1.09	0.0516
1.1	0.0268		1.1	0.0236		1.1	0.0504
1.11	0.0104		1.11	0.0077		1.1	0.0154
1.12	0.0092		1.12	0.0069		1.11	0.0071
1.12	-0.0558		1.12	-0.0414		1.12	0.0067
1.12	-0.0568		1.12	-0.0491		1.12	0.0065
1.13	-0.0561		1.13	-0.0479		1.12	-0.0385
1.14	-0.0554		1.14	-0.0471		1.13	-0.0391
1.15	-0.0548		1.15	-0.0463		1.14	-0.0385
1.16	-0.0543		1.16	-0.0455		1.15	-0.0376
1.17	-0.0539		1.17	-0.0449		1.16	-0.0367
1.17	-0.0534		1.18	-0.0443		1.17	-0.0359
1.18	-0.0531		1.18	-0.0439		1.17	-0.0352
1.19	-0.0526		1.19	-0.0434		1.18	-0.0346
1.2	-0.0524		1.2	-0.0428		1.19	-0.0341
1.21	-0.0521		1.21	-0.0425		1.2	-0.0336
1.22	-0.0518		1.22	-0.0421		1.21	-0.0333
1.22	-0.0516		1.23	-0.042		1.22	-0.033
1.23	-0.0515		1.23	-0.0416		1.22	-0.0328
1.24	-0.0512		1.24	-0.0414		1.23	-0.0326
1.25	-0.0511		1.25	-0.0413		1.24	-0.0324
1.26	-0.051		1.26	-0.0412		1.25	-0.0323
1.27	-0.0509		1.27	-0.0411		1.26	-0.0322
1.27	-0.0509		1.27	-0.0409		1.27	-0.0321
1.28	-0.0508		1.28	-0.041		1.27	-0.032
1.29	-0.0508		1.29	-0.041		1.28	-0.032
1.3	-0.0509		1.3	-0.041		1.29	-0.032
1.31	-0.051		1.31	-0.0409		1.3	-0.0321
1.32	-0.0511		1.32	-0.041		1.31	-0.0321
1.32	-0.0513		1.32	-0.041		1.32	-0.0322
1.33	-0.0515		1.33	-0.0409		1.32	-0.0322
1.34	-0.0519		1.34	-0.0408		1.33	-0.0323
1.35	-0.0522		1.35	-0.041		1.34	-0.0324
1.36	-0.0526		1.36	-0.0412		1.35	-0.0324
1.37	-0.053		1.37	-0.0412		1.36	-0.0325
1.37	-0.0535		1.38	-0.0415		1.37	-0.0326
1.38	-0.0541		1.38	-0.0417		1.37	-0.0328
1.39	-0.0547		1.39	-0.0419		1.38	-0.0329
1.4	-0.0554		1.4	-0.042		1.39	-0.033
1.41	-0.0562		1.41	-0.0422		1.4	-0.0332
1.42	-0.0569		1.42	-0.0422		1.41	-0.0334
1.42	-0.0576		1.43	-0.0424		1.42	-0.0335
1.43	-0.0583		1.43	-0.0425		1.42	-0.0336
1.44	-0.0589		1.44	-0.0426		1.43	-0.0338
1.45	-0.0595		1.45	-0.0428		1.44	-0.034
1.46	-0.0599		1.46	-0.0419		1.45	-0.0342
1.47	-0.0603		1.47	-0.0421		1.46	-0.0345
1.47	-0.0604		1.48	-0.0422		1.47	-0.0347
1.48	-0.0607		1.48	-0.0423		1.47	-0.035
1.49	-0.0609		1.49	-0.0425		1.48	-0.0353
1.5	-0.0611		1.5	-0.0426		1.49	-0.0357
1.51	-0.0612		1.51	-0.0427		1.5	-0.036
1.52	-0.0613		1.52	-0.0428		1.51	-0.0364
1.52	-0.0612		1.52	-0.043		1.52	-0.0368
1.53	-0.0612		1.53	-0.043		1.52	-0.0372
1.54	-0.0612		1.54	-0.043		1.53	-0.0375
1.55	-0.0612		1.55	-0.043		1.54	-0.0379
1.56	-0.061		1.56	-0.0429		1.55	-0.0383
1.57	-0.0608		1.57	-0.0429		1.56	-0.0387
1.57	-0.0606		1.57	-0.0429		1.57	-0.039
1.58	-0.0604		1.58	-0.0427		1.57	-0.0393
1.59	-0.0602		1.59	-0.0425		1.58	-0.0395
1.6	-0.0599		1.6	-0.0422		1.59	-0.0396
1.61	-0.0597		1.61	-0.0422		1.6	-0.0397
1.62	-0.0595		1.62	-0.0421		1.61	-0.0397
1.62	-0.0191		1.62	-0.0152		1.62	-0.0397
1.62	-0.0061		1.62	-0.005		1.62	-0.02
1.63	-0.005		1.63	-0.0041		1.62	-0.0041
1.63	0.0312		1.63	0.0193		1.63	-0.0032
1.64	0.046		1.64	0.031		1.63	0.02
1.65	0.047		1.65	0.0331		1.64	0.0283
1.66	0.0467		1.66	0.0339		1.65	0.0293
1.67	0.0464		1.67	0.0344		1.66	0.0294
1.67	0.0464		1.68	0.0346		1.67	0.0293
1.68	0.0465		1.68	0.0351		1.67	0.0292
1.69	0.0466		1.69	0.0355		1.68	0.0291
1.7	0.0467		1.7	0.0358		1.69	0.0291
1.71	0.0468		1.71	0.0361		1.7	0.0291
1.72	0.0468		1.72	0.0362		1.71	0.0291
1.72	0.047		1.73	0.0366		1.72	0.0291
1.73	0.0471		1.73	0.0367		1.72	0.0291
1.74	0.0471		1.74	0.0369		1.73	0.0292
1.75	0.0472		1.75	0.037		1.74	0.0292
1.76	0.0473		1.76	0.0369		1.75	0.0293
1.77	0.0473		1.77	0.037		1.76	0.0293
1.77	0.0473		1.77	0.0371		1.77	0.0294
1.78	0.0473		1.78	0.0371		1.77	0.0295
1.79	0.0474		1.79	0.0371		1.78	0.0295
1.8	0.0474		1.8	0.0371		1.79	0.0296
1.81	0.0474		1.81	0.0369		1.8	0.0296
1.82	0.0475		1.82	0.037		1.81	0.0297
1.82	0.0475		1.82	0.037		1.82	0.0297
1.83	0.0475		1.83	0.0368		1.82	0.0298
1.84	0.0475		1.84	0.0368		1.83	0.0299
1.85	0.0475		1.85	0.0369		1.84	0.0299
1.86	0.0476		1.86	0.037		1.85	0.03
1.87	0.0476		1.87	0.0369		1.86	0.0301
1.87	0.0477		1.88	0.0369		1.87	0.0302
1.88	0.0478		1.88	0.037		1.87	0.0303
1.89	0.0478		1.89	0.0371		1.88	0.0304
1.9	0.0479		1.9	0.037		1.89	0.0305
1.91	0.0481		1.91	0.0372		1.9	0.0306
1.92	0.0483		1.92	0.0373		1.91	0.0308
1.92	0.0485		1.93	0.0372		1.92	0.0309
1.93	0.0488		1.93	0.0375		1.92	0.0311
1.94	0.0492		1.94	0.0376		1.93	0.0313
1.95	0.0495		1.95	0.0379		1.94	0.0315
1.96	0.05		1.96	0.0383		1.95	0.0317
1.97	0.0506		1.97	0.0386		1.96	0.032
1.97	0.0513		1.98	0.0392		1.97	0.0322
1.98	0.0521		1.98	0.0398		1.97	0.0325
1.99	0.0532		1.99	0.0407		1.98	0.0329
2	0.0546		2	0.0418		1.99	0.0332
2.01	0.0566		2.01	0.0432		2	0.0337
2.02	0.0592		2.02	0.0449		2.01	0.0342
2.02	0.0622		2.02	0.0473		2.02	0.0349
2.03	0.0655		2.03	0.0501		2.02	0.0356
2.04	0.0685		2.04	0.0536		2.03	0.0365
2.05	0.0709		2.05	0.0567		2.04	0.0377
2.06	0.0726		2.06	0.0591		2.05	0.0392
2.07	0.0736		2.07	0.0607		2.06	0.0411
2.07	0.0739		2.08	0.061		2.07	0.0436
2.08	0.074		2.08	0.061		2.07	0.0464
2.09	0.0737		2.09	0.0605		2.08	0.0488
2.1	0.0733		2.1	0.0599		2.09	0.0499
2.11	0.0729		2.11	0.0591		2.1	0.0498
2.12	0.0723		2.12	0.0584		2.11	0.0489
2.12	0.0717		2.12	0.0576		2.12	0.048
2.13	0.0711		2.13	0.0572		2.12	0.0471
2.13	0.0235		2.13	0.0191		2.13	0.0464
2.14	0.0066		2.14	0.0056		2.13	0.0156
2.15	0.0056		2.15	0.0049		2.14	0.006
2.15	-0.0414		2.15	-0.0316		2.15	0.0054
2.16	-0.0502		2.16	-0.0416		2.15	-0.0273
2.17	-0.0498		2.17	-0.0413		2.16	-0.0345
2.17	-0.0496		2.17	-0.0411		2.17	-0.036
2.18	-0.0494		2.18	-0.0407		2.17	-0.0363
2.19	-0.0494		2.19	-0.0405		2.18	-0.036
2.2	-0.0493		2.2	-0.0401		2.19	-0.0355
2.21	-0.0494		2.21	-0.04		2.2	-0.0348
2.22	-0.0493		2.22	-0.0398		2.21	-0.0341
2.22	-0.0493		2.23	-0.0391		2.22	-0.0335
2.23	-0.0494		2.23	-0.0388		2.22	-0.0329
2.24	-0.0494		2.24	-0.0388		2.23	-0.0325
2.25	-0.0494		2.25	-0.0386		2.24	-0.0321
2.26	-0.0493		2.26	-0.0385		2.25	-0.0317
2.27	-0.0493		2.27	-0.0381		2.26	-0.0315
2.27	-0.0493		2.27	-0.0379		2.27	-0.0312
2.28	-0.0492		2.28	-0.0379		2.27	-0.031
2.29	-0.0492		2.29	-0.0376		2.28	-0.0308
2.3	-0.0491		2.3	-0.0374		2.29	-0.0307
2.31	-0.049		2.31	-0.0375		2.3	-0.0306
2.32	-0.049		2.32	-0.0372		2.31	-0.0305
2.32	-0.0489		2.33	-0.0372		2.32	-0.0304
2.33	-0.0489		2.33	-0.0371		2.32	-0.0304
2.34	-0.0488		2.34	-0.037		2.33	-0.0304
2.35	-0.0488		2.35	-0.0369		2.34	-0.0304
2.36	-0.0488		2.36	-0.0368		2.35	-0.0304
2.37	-0.0488		2.37	-0.0367		2.36	-0.0304
2.37	-0.0488		2.38	-0.0366		2.37	-0.0305
2.38	-0.0489		2.38	-0.0366		2.37	-0.0306
2.39	-0.0488		2.39	-0.0364		2.38	-0.0306
2.4	-0.0488		2.4	-0.0366		2.39	-0.0307
2.41	-0.0489		2.41	-0.0365		2.4	-0.0308
2.42	-0.049		2.42	-0.0367		2.41	-0.0309
2.42	-0.0491		2.42	-0.0367		2.42	-0.0311
2.43	-0.0492		2.43	-0.0369		2.42	-0.0312
2.44	-0.0493		2.44	-0.0368		2.43	-0.0313
2.45	-0.0493		2.45	-0.0369		2.44	-0.0314
2.46	-0.0495		2.46	-0.0371		2.45	-0.0316
2.47	-0.0497		2.47	-0.0373		2.46	-0.0317
2.47	-0.0499		2.48	-0.0376		2.47	-0.0319
2.48	-0.0502		2.48	-0.0379		2.47	-0.0321
2.49	-0.0504		2.49	-0.0381		2.48	-0.0323
2.5	-0.0508		2.5	-0.0384		2.49	-0.0325
2.51	-0.0512		2.51	-0.0387		2.5	-0.0327
2.52	-0.0516		2.52	-0.0391		2.51	-0.033
2.52	-0.052		2.52	-0.0394		2.52	-0.0332
2.53	-0.0525		2.53	-0.0397		2.52	-0.0335
2.54	-0.0531		2.54	-0.0401		2.53	-0.0338
2.55	-0.0538		2.55	-0.0405		2.54	-0.0342
2.56	-0.0544		2.56	-0.0409		2.55	-0.0346
2.57	-0.0551		2.57	-0.0413		2.56	-0.0349
2.57	-0.056		2.58	-0.0416		2.57	-0.0353
2.58	-0.0567		2.58	-0.042		2.57	-0.0357
2.59	-0.0575		2.59	-0.0424		2.58	-0.0361
2.6	-0.0583		2.6	-0.0426		2.59	-0.0366
2.61	-0.0589		2.61	-0.0428		2.6	-0.037
2.62	-0.0592		2.62	-0.0429		2.61	-0.0375
2.62	-0.0595		2.62	-0.0431		2.62	-0.0379
2.63	-0.0596		2.63	-0.043		2.62	-0.0383
2.64	-0.0596		2.64	-0.043		2.63	-0.0386
2.65	-0.0596		2.65	-0.0431		2.64	-0.0389
2.65	-0.0196		2.65	-0.0152		2.65	-0.039
2.66	-0.0057		2.66	-0.005		2.65	-0.014
2.67	-0.0045		2.67	-0.0039		2.66	-0.0037
2.67	0.0073		2.67	0.0204		2.67	-0.0027
2.67	0.0455		2.67	0.0314		2.67	-0.0026
2.68	0.0462		2.68	0.0329		2.67	0.0279
2.69	0.0459		2.69	0.0335		2.68	0.0287
2.7	0.0458		2.7	0.0338		2.69	0.0287
2.71	0.0458		2.71	0.034		2.7	0.0285
2.72	0.0458		2.72	0.0342		2.71	0.0284
2.72	0.0458		2.73	0.0344		2.72	0.0283
2.73	0.0458		2.73	0.0346		2.72	0.0282
2.74	0.0457		2.74	0.0348		2.73	0.0281
2.75	0.0457		2.75	0.035		2.74	0.028
2.76	0.0456		2.76	0.0352		2.75	0.028
2.77	0.0455		2.77	0.0354		2.76	0.0279
2.77	0.0454		2.77	0.0354		2.77	0.0279
2.78	0.0454		2.78	0.0353		2.77	0.0279
2.79	0.0453		2.79	0.0355		2.78	0.0279
2.8	0.0452		2.8	0.0355		2.79	0.0279
2.81	0.0451		2.81	0.0352		2.8	0.0279
2.82	0.045		2.82	0.0354		2.81	0.0279
2.82	0.0449		2.83	0.0353		2.82	0.0279
2.83	0.0449		2.83	0.0352		2.82	0.0279
2.84	0.0448		2.84	0.0351		2.83	0.028
2.85	0.0448		2.85	0.035		2.84	0.0281
2.86	0.0447		2.86	0.0349		2.85	0.0281
2.87	0.0447		2.87	0.0349		2.86	0.0281
2.87	0.0447		2.88	0.0348		2.87	0.0282
2.88	0.0447		2.88	0.0346		2.87	0.0283
2.89	0.0447		2.89	0.0346		2.88	0.0284
2.9	0.0447		2.9	0.0346		2.89	0.0284
2.91	0.0447		2.91	0.0345		2.9	0.0285
2.92	0.0447		2.92	0.0345		2.91	0.0286
2.92	0.0449		2.92	0.0345		2.92	0.0287
2.93	0.045		2.93	0.0346		2.92	0.0289
2.94	0.0451		2.94	0.0346		2.93	0.029
2.95	0.0453		2.95	0.0347		2.94	0.0292
2.96	0.0455		2.96	0.0348		2.95	0.0293
2.97	0.0458		2.97	0.035		2.96	0.0295
2.97	0.046		2.98	0.0349		2.97	0.0296
2.98	0.0463		2.98	0.0352		2.97	0.0299
2.99	0.0467		2.99	0.0355		2.98	0.0301
3	0.0473		3	0.0359		2.99	0.0303
3.01	0.0478		3.01	0.0362		3	0.0307
3.02	0.0485		3.02	0.0368		3.01	0.031
3.02	0.0493		3.02	0.0374		3.02	0.0313
3.03	0.0504		3.03	0.0381		3.02	0.0317
3.04	0.0516		3.04	0.039		3.03	0.0322
3.05	0.0531		3.05	0.0402		3.04	0.0327
3.06	0.0551		3.06	0.0417		3.05	0.0334
3.07	0.0576		3.07	0.0435		3.06	0.0342
3.07	0.0604		3.08	0.0456		3.07	0.0351
3.08	0.0634		3.08	0.0482		3.07	0.0363
3.09	0.0659		3.09	0.0511		3.08	0.0377
3.1	0.0676		3.1	0.0538		3.09	0.0395
3.11	0.0686		3.11	0.0557		3.1	0.0414
3.12	0.0691		3.12	0.0567		3.11	0.0433
3.12	0.0691		3.12	0.0569		3.12	0.0447
3.13	0.0689		3.13	0.0566		3.12	0.0455
3.14	0.0683		3.14	0.0559		3.13	0.0456
3.15	0.0676		3.15	0.0552		3.14	0.0454
3.16	0.0668		3.16	0.0545		3.15	0.0449
3.17	0.066		3.17	0.0538		3.16	0.0445
3.17	0.0228		3.17	0.0175		3.17	0.0441
3.17	0.0059		3.17	0.0055		3.17	0.0137
3.18	0.0049		3.18	0.0047		3.17	0.0052
3.18	-0.0103		3.18	-0.0298		3.18	0.0046
3.19	-0.0479		3.19	-0.0392		3.18	0.0045
3.2	-0.0477		3.2	-0.0392		3.19	-0.0324
3.21	-0.0473		3.21	-0.039		3.2	-0.0339
3.22	-0.0471		3.22	-0.0388		3.21	-0.0343
3.22	-0.0469		3.23	-0.0385		3.22	-0.0342
3.23	-0.0467		3.23	-0.0383		3.22	-0.0338
3.24	-0.0467		3.24	-0.038		3.23	-0.0332
3.25	-0.0468		3.25	-0.0377		3.24	-0.0326
3.26	-0.0468		3.26	-0.0374		3.25	-0.032
3.27	-0.0469		3.27	-0.0374		3.26	-0.0315
3.27	-0.0469		3.27	-0.0372		3.27	-0.031
3.28	-0.0469		3.28	-0.037		3.27	-0.0306
3.29	-0.0469		3.29	-0.0367		3.28	-0.0302
3.3	-0.0469		3.3	-0.0367		3.29	-0.0299
3.31	-0.0469		3.31	-0.0364		3.3	-0.0296
3.32	-0.0469		3.32	-0.0364		3.31	-0.0295
3.32	-0.0468		3.33	-0.0362		3.32	-0.0292
3.33	-0.0468		3.33	-0.0361		3.32	-0.0291
3.34	-0.0468		3.34	-0.0359		3.33	-0.029
3.35	-0.0468		3.35	-0.0359		3.34	-0.029
3.36	-0.0466		3.36	-0.0356		3.35	-0.0289
3.37	-0.0465		3.37	-0.0357		3.36	-0.0289
3.37	-0.0465		3.38	-0.0356		3.37	-0.029
3.38	-0.0464		3.38	-0.0353		3.37	-0.029
3.39	-0.0464		3.39	-0.0354		3.38	-0.029
3.4	-0.0464		3.4	-0.0354		3.39	-0.0291
3.41	-0.0464		3.41	-0.0354		3.4	-0.0292
3.42	-0.0463		3.42	-0.0352		3.41	-0.0292
3.42	-0.0463		3.42	-0.0352		3.42	-0.0293
3.43	-0.0463		3.43	-0.0353		3.42	-0.0295
3.44	-0.0463		3.44	-0.0353		3.43	-0.0296
3.45	-0.0463		3.45	-0.0354		3.44	-0.0298
3.46	-0.0463		3.46	-0.0353		3.45	-0.0299
3.47	-0.0464		3.47	-0.0353		3.46	-0.03
3.47	-0.0464		3.48	-0.0356		3.47	-0.0302
3.48	-0.0464		3.48	-0.0357		3.47	-0.0304
3.49	-0.0465		3.49	-0.0357		3.48	-0.0306
3.5	-0.0466		3.5	-0.0358		3.49	-0.0307
3.51	-0.0468		3.51	-0.0361		3.5	-0.0309
3.52	-0.047		3.52	-0.0363		3.51	-0.0311
3.52	-0.0472		3.52	-0.0364		3.52	-0.0313
3.53	-0.0475		3.53	-0.0366		3.52	-0.0315
3.54	-0.0478		3.54	-0.0369		3.53	-0.0317
3.55	-0.0481		3.55	-0.0373		3.54	-0.032
3.56	-0.0485		3.56	-0.0375		3.55	-0.0322
3.57	-0.0489		3.57	-0.0378		3.56	-0.0325
3.57	-0.0495		3.58	-0.0383		3.57	-0.0328
3.58	-0.0501		3.58	-0.0388		3.57	-0.0331
3.59	-0.0507		3.59	-0.0392		3.58	-0.0334
3.6	-0.0515		3.6	-0.0397		3.59	-0.0338
3.61	-0.052		3.61	-0.0403		3.6	-0.0341
3.62	-0.0529		3.62	-0.0408		3.61	-0.0345
3.62	-0.0538		3.62	-0.0413		3.62	-0.0349
3.63	-0.0548		3.63	-0.0416		3.62	-0.0353
3.64	-0.0558		3.64	-0.0421		3.63	-0.0357
3.65	-0.0568		3.65	-0.0425		3.64	-0.0361
3.66	-0.0577		3.66	-0.043		3.65	-0.0365
3.67	-0.0584		3.67	-0.0432		3.66	-0.0369
3.67	-0.0589		3.67	-0.0437		3.67	-0.0371
3.68	-0.0591		3.68	-0.0436		3.67	-0.0374
3.68	-0.0197		3.68	-0.0151		3.68	-0.0378
3.69	-0.0055		3.69	-0.0048		3.68	-0.0127
3.7	-0.0043		3.7	-0.0036		3.69	-0.0035
3.7	-0.0039		3.7	0.0217		3.7	-0.0026
3.71	0.0448		3.71	0.0321		3.7	-0.0025
3.72	0.0453		3.72	0.0331		3.71	0.0274
3.72	0.0451		3.73	0.0334		3.72	0.0281
3.73	0.0449		3.73	0.0336		3.72	0.028
3.74	0.0448		3.74	0.0334		3.73	0.0278
3.75	0.0446		3.75	0.0335		3.74	0.0277
3.76	0.0445		3.76	0.0336		3.75	0.0276
3.77	0.0443		3.77	0.0338		3.76	0.0275
3.77	0.0441		3.77	0.0339		3.77	0.0274
3.78	0.044		3.78	0.0339		3.77	0.0273
3.79	0.0438		3.79	0.0339		3.78	0.0272
3.8	0.0437		3.8	0.0339		3.79	0.0271
3.81	0.0435		3.81	0.034		3.8	0.0271
3.82	0.0434		3.82	0.0339		3.81	0.0271
3.82	0.0433		3.83	0.0338		3.82	0.027
3.83	0.0432		3.83	0.0339		3.82	0.027
3.84	0.0431		3.84	0.0339		3.83	0.027
3.85	0.043		3.85	0.0337		3.84	0.027
3.86	0.0429		3.86	0.0336		3.85	0.027
3.87	0.0429		3.87	0.0336		3.86	0.027
3.87	0.0428		3.88	0.0333		3.87	0.027
3.88	0.0427		3.88	0.0332		3.87	0.0271
3.89	0.0427		3.89	0.0332		3.88	0.0271
3.9	0.0427		3.9	0.0332		3.89	0.0272
3.91	0.0426		3.91	0.033		3.9	0.0272
3.92	0.0426		3.92	0.0332		3.91	0.0272
3.92	0.0426		3.92	0.033		3.92	0.0273
3.93	0.0427		3.93	0.0332		3.92	0.0274
3.94	0.0427		3.94	0.0331		3.93	0.0274
3.95	0.0428		3.95	0.0332		3.94	0.0275
3.96	0.0429		3.96	0.0331		3.95	0.0276
3.97	0.0431		3.97	0.0333		3.96	0.0278
3.97	0.0432		3.98	0.0334		3.97	0.0279
3.98	0.0434		3.98	0.0333		3.97	0.028
3.99	0.0436		3.99	0.0334		3.98	0.0282
4	0.0438		4	0.0335		3.99	0.0283
4.01	0.0441		4.01	0.0338		4	0.0285
4.02	0.0444		4.02	0.0339		4.01	0.0287
4.02	0.0449		4.03	0.0343		4.02	0.0289
4.03	0.0453		4.03	0.0347		4.02	0.0291
4.04	0.0458		4.04	0.0349		4.03	0.0294
4.05	0.0464		4.05	0.0354		4.04	0.0297
4.06	0.047		4.06	0.0359		4.05	0.0301
4.07	0.0479		4.07	0.0366		4.06	0.0305
4.07	0.0488		4.08	0.0374		4.07	0.031
4.08	0.05		4.08	0.0382		4.07	0.0315
4.09	0.0514		4.09	0.0394		4.08	0.0321
4.1	0.0532		4.1	0.0408		4.09	0.0329
4.11	0.0554		4.11	0.0425		4.1	0.0337
4.12	0.0579		4.12	0.0446		4.11	0.0348
4.12	0.0608		4.12	0.047		4.12	0.0359
4.13	0.0631		4.13	0.0499		4.12	0.0371
4.14	0.0647		4.14	0.0524		4.13	0.0383
4.15	0.0657		4.15	0.0543		4.14	0.0395
4.16	0.066		4.16	0.0552		4.15	0.0407
4.17	0.0658		4.17	0.0551		4.16	0.0417
4.17	0.0652		4.17	0.0547		4.17	0.0425
4.18	0.0646		4.18	0.054		4.17	0.043
4.19	0.0637		4.19	0.0532		4.18	0.0432
4.2	0.0629		4.2	0.0523		4.19	0.0431
4.2	0.0185		4.2	0.0168		4.2	0.0428
4.21	0.0056		4.21	0.0052		4.2	0.0151
4.22	0.0046		4.22	0.0044		4.21	0.0048
4.22	0.0041		4.22	-0.0292		4.22	0.0041
4.22	-0.0465		4.22	-0.0383		4.22	0.0039
4.23	-0.0463		4.23	-0.0385		4.22	-0.032
4.24	-0.0459		4.24	-0.0381		4.23	-0.033
4.25	-0.0457		4.25	-0.0376		4.24	-0.0329
4.26	-0.0455		4.26	-0.0372		4.25	-0.0326
4.27	-0.0454		4.27	-0.0368		4.26	-0.0321
4.27	-0.0453		4.27	-0.0366		4.27	-0.0315
4.28	-0.0453		4.28	-0.0362		4.27	-0.031
4.29	-0.0453		4.29	-0.0359		4.28	-0.0305
4.3	-0.0453		4.3	-0.0356		4.29	-0.03
4.31	-0.0453		4.31	-0.0354		4.3	-0.0296
4.32	-0.0452		4.32	-0.0351		4.31	-0.0292
4.32	-0.0452		4.32	-0.035		4.32	-0.0289
4.33	-0.0452		4.33	-0.0347		4.32	-0.0286
4.34	-0.0451		4.34	-0.0347		4.33	-0.0284
4.35	-0.0451		4.35	-0.0345		4.34	-0.0283
4.36	-0.045		4.36	-0.0344		4.35	-0.0281
4.37	-0.045		4.37	-0.0342		4.36	-0.028
4.37	-0.045		4.37	-0.0341		4.37	-0.0279
4.38	-0.0449		4.38	-0.0339		4.37	-0.0279
4.39	-0.0449		4.39	-0.0338		4.38	-0.0278
4.4	-0.0448		4.4	-0.0339		4.39	-0.0278
4.41	-0.0448		4.41	-0.0338		4.4	-0.0278
4.42	-0.0448		4.42	-0.0336		4.41	-0.0278
4.42	-0.0448		4.42	-0.0336		4.42	-0.0279
4.43	-0.0446		4.43	-0.0335		4.42	-0.0279
4.44	-0.0446		4.44	-0.0335		4.43	-0.028
4.45	-0.0446		4.45	-0.0337		4.44	-0.0281
4.46	-0.0445		4.46	-0.0335		4.45	-0.0282
4.47	-0.0445		4.47	-0.0335		4.46	-0.0283
4.47	-0.0445		4.47	-0.0337		4.47	-0.0285
4.48	-0.0444		4.48	-0.0337		4.47	-0.0286
4.49	-0.0444		4.49	-0.0337		4.48	-0.0287
4.5	-0.0444		4.5	-0.0338		4.49	-0.0289
4.51	-0.0445		4.51	-0.0339		4.5	-0.029
4.52	-0.0446		4.52	-0.0339		4.51	-0.0292
4.52	-0.0447		4.52	-0.0342		4.52	-0.0294
4.53	-0.0448		4.53	-0.0342		4.52	-0.0296
4.54	-0.0449		4.54	-0.0343		4.53	-0.0296
4.55	-0.0451		4.55	-0.0347		4.54	-0.0298
4.56	-0.0453		4.56	-0.0347		4.55	-0.0299
4.57	-0.0455		4.57	-0.0349		4.56	-0.0302
4.57	-0.0457		4.57	-0.0354		4.57	-0.0304
4.58	-0.046		4.58	-0.0356		4.57	-0.0306
4.59	-0.0463		4.59	-0.036		4.58	-0.0309
4.6	-0.0468		4.6	-0.0362		4.59	-0.0311
4.61	-0.0472		4.61	-0.0365		4.6	-0.0314
4.62	-0.0478		4.62	-0.037		4.61	-0.0317
4.62	-0.0484		4.62	-0.0374		4.62	-0.032
4.63	-0.0491		4.63	-0.0379		4.62	-0.0323
4.64	-0.0498		4.64	-0.0385		4.63	-0.0327
4.65	-0.0507		4.65	-0.039		4.64	-0.0331
4.66	-0.0514		4.66	-0.0397		4.65	-0.0334
4.67	-0.0525		4.67	-0.0403		4.66	-0.0338
4.67	-0.0536		4.67	-0.0408		4.67	-0.0342
4.68	-0.0548		4.68	-0.0412		4.67	-0.0346
4.69	-0.0559		4.69	-0.0418		4.68	-0.035
4.7	-0.057		4.7	-0.0423		4.69	-0.0355
4.71	-0.0579		4.71	-0.0429		4.7	-0.0359
4.72	-0.0584		4.72	-0.0432		4.71	-0.0364
4.72	-0.0283		4.72	-0.0147		4.72	-0.0368
4.72	-0.0054		4.72	-0.0045		4.72	-0.014
4.73	-0.0042		4.73	-0.0036		4.72	-0.0034
4.73	0.0341		4.73	0.0218		4.73	-0.0025
4.74	0.0442		4.74	0.0319		4.73	-0.0024
4.75	0.0445		4.75	0.0328		4.74	0.0273
4.76	0.0442		4.76	0.033		4.75	0.0278
4.77	0.044		4.77	0.033		4.76	0.0276
4.77	0.0437		4.77	0.0331		4.77	0.0274
4.78	0.0434		4.78	0.033		4.77	0.0272
4.79	0.0432		4.79	0.0331		4.78	0.0271
4.8	0.0429		4.8	0.0331		4.79	0.0269
4.81	0.0427		4.81	0.0332		4.8	0.0268
4.82	0.0425		4.82	0.0331		4.81	0.0267
4.82	0.0423		4.82	0.0331		4.82	0.0267
4.83	0.0422		4.83	0.0332		4.82	0.0266
4.84	0.042		4.84	0.0329		4.83	0.0265
4.85	0.042		4.85	0.0329		4.84	0.0265
4.86	0.0418		4.86	0.0328		4.85	0.0264
4.87	0.0417		4.87	0.0329		4.86	0.0264
4.87	0.0417		4.87	0.0329		4.87	0.0263
4.88	0.0416		4.88	0.0328		4.87	0.0263
4.89	0.0416		4.89	0.0326		4.88	0.0263
4.9	0.0416		4.9	0.0326		4.89	0.0263
4.91	0.0415		4.91	0.0327		4.9	0.0263
4.92	0.0415		4.92	0.0327		4.91	0.0263
4.92	0.0414		4.92	0.0325		4.92	0.0262
4.93	0.0414		4.93	0.0325		4.92	0.0263
4.94	0.0414		4.94	0.0326		4.93	0.0263
4.95	0.0414		4.95	0.0324		4.94	0.0264
4.96	0.0415		4.96	0.0325		4.95	0.0264
4.97	0.0415		4.97	0.0326		4.96	0.0266
4.97	0.0416		4.97	0.0325		4.97	0.0266
4.98	0.0417		4.98	0.0327		4.97	0.0267
4.99	0.0418		4.99	0.0326		4.98	0.0268
5	0.042		5	0.0328		4.99	0.0269
5.01	0.0421		5.01	0.0328		5	0.0271
5.02	0.0423		5.02	0.033		5.01	0.0272
5.02	0.0425		5.02	0.0332		5.02	0.0274
5.03	0.0428		5.03	0.0332		5.02	0.0275
5.04	0.0431		5.04	0.0334		5.03	0.0277
5.05	0.0434		5.05	0.0337		5.04	0.0279
5.06	0.0438		5.06	0.0338		5.05	0.0282
5.07	0.0441		5.07	0.0344		5.06	0.0284
5.07	0.0446		5.07	0.0346		5.07	0.0288
5.08	0.0451		5.08	0.0351		5.07	0.0291
5.09	0.0457		5.09	0.0356		5.08	0.0294
5.1	0.0464		5.1	0.0361		5.09	0.0299
5.11	0.0472		5.11	0.0369		5.1	0.0304
5.12	0.0482		5.12	0.0377		5.11	0.0309
5.12	0.0494		5.12	0.0387		5.12	0.0315
5.13	0.0507		5.13	0.0398		5.12	0.0321
5.14	0.0525		5.14	0.0413		5.13	0.0329
5.15	0.0546		5.15	0.0428		5.14	0.0337
5.16	0.0569		5.16	0.0447		5.15	0.0345
5.17	0.0594		5.17	0.0472		5.16	0.0353
5.17	0.0618		5.17	0.0495		5.17	0.0361
5.18	0.0634		5.18	0.0518		5.17	0.0371
5.19	0.0642		5.19	0.0536		5.18	0.038
5.2	0.0642		5.2	0.0537		5.19	0.0389
5.21	0.0637		5.21	0.0537		5.2	0.0398
5.22	0.0629		5.22	0.0531		5.21	0.0406
5.22	0.0622		5.22	0.0524		5.22	0.0413
5.23	0.0612		5.23	0.0516		5.22	0.0417
5.23	0.0185		5.23	0.0167		5.23	0.0419
5.24	0.0054		5.24	0.0052		5.23	0.0133
5.25	0.0044		5.25	0.0043		5.24	0.0045
5.25	-0.0363		5.25	-0.0288		5.25	0.0038
5.26	-0.0457		5.26	-0.0377		5.25	-0.0259
5.27	-0.0456		5.27	-0.0378		5.26	-0.0314
5.27	-0.0451		5.27	-0.0373		5.27	-0.0318
5.28	-0.0448		5.28	-0.0368		5.27	-0.0316
5.29	-0.0445		5.29	-0.0362		5.28	-0.0311
5.3	-0.0443		5.3	-0.0358		5.29	-0.0307
5.31	-0.0442		5.31	-0.0352		5.3	-0.0302
5.32	-0.044		5.32	-0.0348		5.31	-0.0297
5.32	-0.044		5.32	-0.0346		5.32	-0.0293
5.33	-0.0439		5.33	-0.0343		5.32	-0.0289
5.34	-0.0438		5.34	-0.0339		5.33	-0.0286
5.35	-0.0437		5.35	-0.0336		5.34	-0.0283
5.36	-0.0437		5.36	-0.0334		5.35	-0.0281
5.37	-0.0436		5.37	-0.0332		5.36	-0.0278
5.37	-0.0436		5.37	-0.0332		5.37	-0.0276
5.38	-0.0435		5.38	-0.033		5.37	-0.0275
5.39	-0.0435		5.39	-0.0329		5.38	-0.0274
5.4	-0.0434		5.4	-0.0328		5.39	-0.0272
5.41	-0.0434		5.41	-0.0326		5.4	-0.0271
5.42	-0.0433		5.42	-0.0325		5.41	-0.0271
5.42	-0.0433		5.42	-0.0325		5.42	-0.027
5.43	-0.0432		5.43	-0.0325		5.42	-0.027
5.44	-0.043		5.44	-0.0325		5.43	-0.027
5.45	-0.043		5.45	-0.0325		5.44	-0.027
5.46	-0.043		5.46	-0.0325		5.45	-0.027
5.47	-0.0429		5.47	-0.0325		5.46	-0.027
5.47	-0.0429		5.47	-0.0325		5.47	-0.0271
5.48	-0.0429		5.48	-0.0325		5.47	-0.0272
5.49	-0.0428		5.49	-0.0325		5.48	-0.0273
5.5	-0.0429		5.5	-0.0325		5.49	-0.0273
5.51	-0.0428		5.51	-0.0325		5.5	-0.0275
5.52	-0.0428		5.52	-0.0326		5.51	-0.0276
5.52	-0.0429		5.52	-0.0326		5.52	-0.0277
5.53	-0.0427		5.53	-0.0327		5.52	-0.0278
5.54	-0.0428		5.54	-0.0329		5.53	-0.0279
5.55	-0.0428		5.55	-0.0331		5.54	-0.0281
5.56	-0.0428		5.56	-0.033		5.55	-0.0282
5.57	-0.043		5.57	-0.0334		5.56	-0.0284
5.57	-0.0431		5.57	-0.0335		5.57	-0.0285
5.58	-0.0432		5.58	-0.0337		5.57	-0.0287
5.59	-0.0435		5.59	-0.0339		5.58	-0.0289
5.6	-0.0436		5.6	-0.034		5.59	-0.0291
5.61	-0.0439		5.61	-0.0344		5.6	-0.0293
5.62	-0.0442		5.62	-0.0347		5.61	-0.0295
5.62	-0.0446		5.62	-0.0348		5.62	-0.0297
5.63	-0.0449		5.63	-0.0352		5.62	-0.0299
5.64	-0.0454		5.64	-0.0358		5.63	-0.0302
5.65	-0.0458		5.65	-0.0362		5.64	-0.0305
5.66	-0.0465		5.66	-0.0367		5.65	-0.0308
5.67	-0.0472		5.67	-0.0372		5.66	-0.0311
5.67	-0.0479		5.67	-0.0376		5.67	-0.0315
5.68	-0.0488		5.68	-0.0382		5.67	-0.0319
5.69	-0.0498		5.69	-0.0388		5.68	-0.0323
5.7	-0.0508		5.7	-0.0395		5.69	-0.0327
5.71	-0.052		5.71	-0.0402		5.7	-0.0328
5.72	-0.0533		5.72	-0.0409		5.71	-0.0333
5.72	-0.0546		5.72	-0.0414		5.72	-0.0337
5.73	-0.0559		5.73	-0.0422		5.72	-0.0342
5.74	-0.0571		5.74	-0.043		5.73	-0.0347
5.75	-0.058		5.75	-0.0435		5.74	-0.0352
5.75	-0.0182		5.75	-0.0149		5.75	-0.0357
5.76	-0.0053		5.76	-0.0045		5.75	-0.0129
5.77	-0.004		5.77	-0.0033		5.76	-0.0034
5.77	-0.0035		5.77	0.0227		5.77	-0.0024
5.77	0.0438		5.77	0.0324		5.77	-0.0024
5.78	0.0439		5.78	0.0332		5.77	0.0268
5.79	0.0435		5.79	0.0331		5.78	0.0273
5.8	0.0432		5.8	0.033		5.79	0.0272
5.81	0.0428		5.81	0.0329		5.8	0.027
5.82	0.0423		5.82	0.0329		5.81	0.0268
5.82	0.042		5.82	0.0328		5.82	0.0267
5.83	0.0417		5.83	0.0329		5.82	0.0265
5.84	0.0415		5.84	0.0327		5.83	0.0264
5.85	0.0413		5.85	0.0327		5.84	0.0263
5.86	0.0411		5.86	0.0326		5.85	0.0262
5.87	0.0409		5.87	0.0325		5.86	0.0261
5.87	0.0408		5.87	0.0324		5.87	0.0261
5.88	0.0407		5.88	0.0323		5.87	0.026
5.89	0.0407		5.89	0.0323		5.88	0.026
5.9	0.0406		5.9	0.0322		5.89	0.0259
5.91	0.0405		5.91	0.0322		5.9	0.0259
5.92	0.0405		5.92	0.0321		5.91	0.0259
5.92	0.0404		5.92	0.0321		5.92	0.0258
5.93	0.0404		5.93	0.0321		5.92	0.0258
5.94	0.0404		5.94	0.0321		5.93	0.0258
5.95	0.0404		5.95	0.0321		5.94	0.0258
5.96	0.0404		5.96	0.0322		5.95	0.0259
5.97	0.0405		5.97	0.0322		5.96	0.0259
5.97	0.0405		5.97	0.0323		5.97	0.0259
5.98	0.0406		5.98	0.0323		5.97	0.026
5.99	0.0406		5.99	0.0324		5.98	0.0261
6	0.0407		6	0.0323		5.99	0.0262
6.01	0.0408		6.01	0.0323		6	0.0262
6.02	0.0409		6.02	0.0326		6.01	0.0263
6.02	0.041		6.02	0.0327		6.02	0.0264
6.03	0.0411		6.03	0.0327		6.02	0.0265
6.04	0.0413		6.04	0.0328		6.03	0.0266
6.05	0.0415		6.05	0.0331		6.04	0.0268
6.06	0.0417		6.06	0.0332		6.05	0.027
6.07	0.0419		6.07	0.0334		6.06	0.0271
6.07	0.0422		6.07	0.0336		6.07	0.0273
6.08	0.0425		6.08	0.0338		6.07	0.0276
6.09	0.0428		6.09	0.0341		6.08	0.0278
6.1	0.0432		6.1	0.0344		6.09	0.0281
6.11	0.0435		6.11	0.0347		6.1	0.0284
6.12	0.044		6.12	0.035		6.11	0.0288
6.12	0.0445		6.12	0.0356		6.12	0.0291
6.13	0.0452		6.13	0.0361		6.12	0.0295
6.14	0.0459		6.14	0.0367		6.13	0.03
6.15	0.0468		6.15	0.0374		6.14	0.0305
6.16	0.0477		6.16	0.0382		6.15	0.031
6.17	0.0488		6.17	0.0393		6.16	0.0316
6.17	0.0502		6.17	0.0407		6.17	0.0322
6.18	0.0518		6.18	0.0419		6.17	0.0329
6.19	0.0538		6.19	0.0436		6.18	0.0336
6.2	0.056		6.2	0.0456		6.19	0.0343
6.21	0.0583		6.21	0.0476		6.2	0.035
6.22	0.0604		6.22	0.05		6.21	0.0358
6.22	0.0621		6.22	0.052		6.22	0.0366
6.23	0.063		6.23	0.0535		6.22	0.0374
6.24	0.0631		6.24	0.0539		6.23	0.0383
6.25	0.0628		6.25	0.0538		6.24	0.0391
6.26	0.0621		6.26	0.0531		6.25	0.04
6.27	0.0613		6.27	0.0521		6.26	0.0406
6.27	0.0203		6.27	0.0164		6.27	0.0411
6.27	0.0053		6.27	0.0053		6.27	0.0129
6.28	0.0043		6.28	0.0043		6.27	0.0044
6.28	-0.0103		6.28	-0.0296		6.28	0.0036
6.29	-0.0456		6.29	-0.0381		6.28	0.0035
6.3	-0.0454		6.3	-0.0379		6.29	-0.0309
6.31	-0.0448		6.31	-0.0371		6.3	-0.0311
6.32	-0.0443		6.32	-0.0363		6.31	-0.0307
6.32	-0.044		6.32	-0.0358		6.32	-0.0302
6.33	-0.0437		6.33	-0.0353		6.32	-0.0297
6.34	-0.0435		6.34	-0.0347		6.33	-0.0293
6.35	-0.0433		6.35	-0.0342		6.34	-0.0289
6.36	-0.0431		6.36	-0.0338		6.35	-0.0285
6.37	-0.0429		6.37	-0.0335		6.36	-0.0281
6.37	-0.0427		6.37	-0.0333		6.37	-0.0278
6.38	-0.0426		6.38	-0.033		6.37	-0.0276
6.39	-0.0425		6.39	-0.0329		6.38	-0.0273
6.4	-0.0424		6.4	-0.0326		6.39	-0.0271
6.41	-0.0423		6.41	-0.0324		6.4	-0.0269
6.42	-0.0423		6.42	-0.0322		6.41	-0.0268
6.42	-0.0422		6.42	-0.0321		6.42	-0.0267
6.43	-0.0422		6.43	-0.032		6.42	-0.0265
6.44	-0.0421		6.44	-0.032		6.43	-0.0265
6.45	-0.0421		6.45	-0.0318		6.44	-0.0264
6.46	-0.0421		6.46	-0.0317		6.45	-0.0264
6.47	-0.042		6.47	-0.0317		6.46	-0.0264
6.47	-0.042		6.47	-0.0317		6.47	-0.0263
6.48	-0.042		6.48	-0.0318		6.47	-0.0264
6.49	-0.0419		6.49	-0.0316		6.48	-0.0264
6.5	-0.0419		6.5	-0.0317		6.49	-0.0264
6.51	-0.0419		6.51	-0.0316		6.5	-0.0265
6.52	-0.0419		6.52	-0.0317		6.51	-0.0265
6.52	-0.0419		6.52	-0.0316		6.52	-0.0266
6.53	-0.0419		6.53	-0.0318		6.52	-0.0267
6.54	-0.0419		6.54	-0.0318		6.53	-0.0268
6.55	-0.0419		6.55	-0.0317		6.54	-0.0269
6.56	-0.0419		6.56	-0.0318		6.55	-0.027
6.57	-0.042		6.57	-0.0318		6.56	-0.0271
6.57	-0.0421		6.57	-0.0319		6.57	-0.0273
6.58	-0.0421		6.58	-0.032		6.57	-0.0274
6.59	-0.0422		6.59	-0.0323		6.58	-0.0276
6.6	-0.0422		6.6	-0.0317		6.59	-0.0277
6.61	-0.0422		6.61	-0.0319		6.6	-0.0279
6.62	-0.0424		6.62	-0.0319		6.61	-0.028
6.62	-0.0425		6.62	-0.032		6.62	-0.0282
6.63	-0.0427		6.63	-0.0322		6.62	-0.0284
6.64	-0.0429		6.64	-0.0324		6.63	-0.0286
6.65	-0.0432		6.65	-0.0328		6.64	-0.0288
6.66	-0.0435		6.66	-0.0329		6.65	-0.029
6.67	-0.0438		6.67	-0.0334		6.66	-0.0292
6.67	-0.0442		6.67	-0.0335		6.67	-0.0294
6.68	-0.0447		6.68	-0.034		6.67	-0.0297
6.69	-0.0452		6.69	-0.0344		6.68	-0.03
6.7	-0.0459		6.7	-0.0348		6.69	-0.0303
6.71	-0.0466		6.71	-0.0354		6.7	-0.0306
6.72	-0.0474		6.72	-0.0359		6.71	-0.031
6.72	-0.0483		6.72	-0.0363		6.72	-0.0314
6.73	-0.0494		6.73	-0.0369		6.72	-0.0319
6.74	-0.0506		6.74	-0.0378		6.73	-0.0323
6.75	-0.0519		6.75	-0.0385		6.74	-0.0328
6.76	-0.0534		6.76	-0.0392		6.75	-0.0333
6.77	-0.0548		6.77	-0.0401		6.76	-0.0338
6.77	-0.0563		6.77	-0.0409		6.77	-0.0344
6.78	-0.0574		6.78	-0.0419		6.77	-0.0349
6.78	-0.0206		6.78	-0.014		6.78	-0.0355
6.79	-0.0052		6.79	-0.0043		6.78	-0.0136
6.8	-0.0039		6.8	-0.0033		6.79	-0.0033
6.8	-0.0035		6.8	0.0219		6.8	-0.0024
6.81	0.0434		6.81	0.0309		6.8	-0.0022
6.82	0.0434		6.82	0.0316		6.81	0.027
6.82	0.0429		6.82	0.0316		6.82	0.0274
6.83	0.0424		6.83	0.0314		6.82	0.0271
6.84	0.0419		6.84	0.0314		6.83	0.0269
6.85	0.0414		6.85	0.0311		6.84	0.0267
6.86	0.041		6.86	0.031		6.85	0.0265
6.87	0.0406		6.87	0.031		6.86	0.0264
6.87	0.0404		6.87	0.0308		6.87	0.0262
6.88	0.0401		6.88	0.0307		6.87	0.0261
6.89	0.04		6.89	0.0304		6.88	0.026
6.9	0.0398		6.9	0.0303		6.89	0.0259
6.91	0.0397		6.91	0.0302		6.9	0.0258
6.92	0.0396		6.92	0.03		6.91	0.0258
6.92	0.0395		6.92	0.03		6.92	0.0257
6.93	0.0394		6.93	0.0299		6.92	0.0257
6.94	0.0394		6.94	0.0299		6.93	0.0255
6.95	0.0393		6.95	0.0299		6.94	0.0255
6.96	0.0393		6.96	0.03		6.95	0.0255
6.97	0.0393		6.97	0.0301		6.96	0.0254
6.97	0.0393		6.97	0.0301		6.97	0.0254
6.98	0.0393		6.98	0.03		6.97	0.0254
6.99	0.0393		6.99	0.0301		6.98	0.0254
7	0.0394		7	0.0301		6.99	0.0254
7.01	0.0394		7.01	0.0303		7	0.0254
7.02	0.0394		7.02	0.0303		7.01	0.0254
7.02	0.0395		7.02	0.0304		7.02	0.0255
7.03	0.0395		7.03	0.0305		7.02	0.0256
7.04	0.0396		7.04	0.0305		7.03	0.0257
7.05	0.0397		7.05	0.0307		7.04	0.0258
7.06	0.0398		7.06	0.0308		7.05	0.0259
7.07	0.04		7.07	0.0307		7.06	0.026
7.07	0.0401		7.07	0.0309		7.07	0.0261
7.08	0.0403		7.08	0.0312		7.07	0.0262
7.09	0.0405		7.09	0.0313		7.08	0.0264
7.1	0.0408		7.1	0.0316		7.09	0.0265
7.11	0.041		7.11	0.0316		7.1	0.0267
7.12	0.0413		7.12	0.032		7.11	0.0269
7.12	0.0416		7.12	0.0322		7.12	0.0272
7.13	0.0418		7.13	0.0325		7.12	0.0274
7.14	0.0422		7.14	0.033		7.13	0.0277
7.15	0.0426		7.15	0.0332		7.14	0.028
7.16	0.0431		7.16	0.0338		7.15	0.0284
7.17	0.0437		7.17	0.0344		7.16	0.0288
7.17	0.0443		7.17	0.0349		7.17	0.0292
7.18	0.0451		7.18	0.0356		7.17	0.0297
7.19	0.0459		7.19	0.0365		7.18	0.0302
7.2	0.0469		7.2	0.0373		7.19	0.0306
7.21	0.048		7.21	0.0384		7.2	0.0312
7.22	0.0494		7.22	0.0398		7.21	0.0317
7.22	0.0511		7.22	0.0412		7.22	0.0323
7.23	0.0531		7.23	0.0429		7.22	0.033
7.24	0.0555		7.24	0.0451		7.23	0.0336
7.25	0.0578		7.25	0.0472		7.24	0.0344
7.26	0.0598		7.26	0.0497		7.25	0.0352
7.27	0.0612		7.27	0.0515		7.26	0.036
7.27	0.0619		7.27	0.0529		7.27	0.0368
7.28	0.0619		7.28	0.0531		7.27	0.0378
7.29	0.0613		7.29	0.0526		7.28	0.0387
7.3	0.0604		7.3	0.0518		7.29	0.0395
7.3	0.0178		7.3	0.0165		7.3	0.0402
7.31	0.0053		7.31	0.0052		7.3	0.0135
7.32	0.0042		7.32	0.0042		7.31	0.0042
7.32	-0.0372		7.32	-0.0296		7.32	0.0035
7.32	-0.0451		7.32	-0.0375		7.32	-0.0247
7.33	-0.0446		7.33	-0.0371		7.32	-0.0303
7.34	-0.0438		7.34	-0.0361		7.33	-0.0305
7.35	-0.0432		7.35	-0.0351		7.34	-0.03
7.36	-0.0427		7.36	-0.0344		7.35	-0.0295
7.37	-0.0423		7.37	-0.0336		7.36	-0.0291
7.37	-0.042		7.37	-0.0331		7.37	-0.0286
7.38	-0.0418		7.38	-0.0328		7.37	-0.0281
7.39	-0.0415		7.39	-0.0322		7.38	-0.0278
7.4	-0.0413		7.4	-0.0319		7.39	-0.0275
7.41	-0.0412		7.41	-0.0316		7.4	-0.0272
7.42	-0.0411		7.42	-0.0315		7.41	-0.0269
7.42	-0.0409		7.42	-0.0314		7.42	-0.0267
7.43	-0.0409		7.43	-0.0311		7.42	-0.0266
7.44	-0.0408		7.44	-0.031		7.43	-0.0264
7.45	-0.0407		7.45	-0.0309		7.44	-0.0263
7.46	-0.0406		7.46	-0.0308		7.45	-0.0262
7.47	-0.0406		7.47	-0.0305		7.46	-0.0261
7.47	-0.0406		7.47	-0.0306		7.47	-0.026
7.48	-0.0405		7.48	-0.0305		7.47	-0.026
7.49	-0.0405		7.49	-0.0304		7.48	-0.026
7.5	-0.0405		7.5	-0.0306		7.49	-0.0259
7.51	-0.0405		7.51	-0.0304		7.5	-0.0259
7.52	-0.0404		7.52	-0.0304		7.51	-0.0259
7.52	-0.0404		7.52	-0.0305		7.52	-0.026
7.53	-0.0404		7.53	-0.0304		7.52	-0.026
7.54	-0.0404		7.54	-0.0306		7.53	-0.026
7.55	-0.0404		7.55	-0.0303		7.54	-0.0261
7.56	-0.0404		7.56	-0.0306		7.55	-0.0262
7.57	-0.0404		7.57	-0.0305		7.56	-0.0263
7.57	-0.0405		7.57	-0.0305		7.57	-0.0263
7.58	-0.0405		7.58	-0.0306		7.57	-0.0264
7.59	-0.0405		7.59	-0.0307		7.58	-0.0265
7.6	-0.0406		7.6	-0.0307		7.59	-0.0267
7.61	-0.0406		7.61	-0.031		7.6	-0.0268
7.62	-0.0407		7.62	-0.0311		7.61	-0.027
7.62	-0.0408		7.62	-0.0312		7.62	-0.0271
7.63	-0.0408		7.63	-0.0313		7.62	-0.0272
7.64	-0.041		7.64	-0.0315		7.63	-0.0274
7.65	-0.0411		7.65	-0.0316		7.64	-0.0275
7.66	-0.0413		7.66	-0.0317		7.65	-0.0277
7.67	-0.0414		7.67	-0.0318		7.66	-0.0278
7.67	-0.0417		7.67	-0.032		7.67	-0.028
7.68	-0.0419		7.68	-0.0322		7.67	-0.0282
7.69	-0.0422		7.69	-0.0327		7.68	-0.0284
7.7	-0.0424		7.7	-0.033		7.69	-0.0285
7.71	-0.0429		7.71	-0.0333		7.7	-0.0287
7.72	-0.0434		7.72	-0.0337		7.71	-0.0289
7.72	-0.0439		7.72	-0.034		7.72	-0.0292
7.73	-0.0446		7.73	-0.0345		7.72	-0.0294
7.74	-0.0453		7.74	-0.035		7.73	-0.0297
7.75	-0.0461		7.75	-0.0356		7.74	-0.0301
7.76	-0.0471		7.76	-0.0361		7.75	-0.0305
7.77	-0.0482		7.77	-0.0368		7.76	-0.0309
7.77	-0.0494		7.77	-0.0372		7.77	-0.0313
7.78	-0.0508		7.78	-0.038		7.77	-0.0317
7.79	-0.0524		7.79	-0.0387		7.78	-0.0322
7.8	-0.054		7.8	-0.0396		7.79	-0.0327
7.81	-0.0557		7.81	-0.0406		7.8	-0.0333
7.82	-0.057		7.82	-0.0414		7.81	-0.0339
7.82	-0.0185		7.82	-0.014		7.82	-0.0345
7.82	-0.0052		7.82	-0.0043		7.82	-0.0134
7.83	-0.0039		7.83	-0.0032		7.82	-0.0033
7.83	-0.0034		7.83	0.0218		7.83	-0.0023
7.84	0.043		7.84	0.0311		7.83	-0.0023
7.85	0.0428		7.85	0.0315		7.84	0.0265
7.86	0.0422		7.86	0.0316		7.85	0.0269
7.87	0.0416		7.87	0.0314		7.86	0.0267
7.87	0.041		7.87	0.0313		7.87	0.0265
7.88	0.0404		7.88	0.031		7.87	0.0263
7.89	0.04		7.89	0.0309		7.88	0.0261
7.9	0.0396		7.9	0.0304		7.89	0.0259
7.91	0.0394		7.91	0.0301		7.9	0.0258
7.92	0.0391		7.92	0.0301		7.91	0.0257
7.92	0.0389		7.92	0.0299		7.92	0.0256
7.93	0.0388		7.93	0.0299		7.92	0.0255
7.94	0.0387		7.94	0.0296		7.93	0.0254
7.95	0.0387		7.95	0.0297		7.94	0.0253
7.96	0.0386		7.96	0.0295		7.95	0.0253
7.97	0.0386		7.97	0.0295		7.96	0.0252
7.97	0.0386		7.97	0.0294		7.97	0.0252
7.98	0.0386		7.98	0.0294		7.97	0.0251
7.99	0.0386		7.99	0.0295		7.98	0.0251
8	0.0386		8	0.0296		7.99	0.0251
8.01	0.0386		8.01	0.0295		8	0.025
8.02	0.0387		8.02	0.0297		8.01	0.0251
8.02	0.0387		8.02	0.0296		8.02	0.0251
8.03	0.0388		8.03	0.0297		8.02	0.0251
8.04	0.0388		8.04	0.0297		8.03	0.0252
8.05	0.0389		8.05	0.0298		8.04	0.0252
8.06	0.039		8.06	0.0299		8.05	0.0252
8.07	0.0391		8.07	0.0299		8.06	0.0253
8.07	0.0392		8.07	0.03		8.07	0.0254
8.08	0.0393		8.08	0.0302		8.07	0.0254
8.09	0.0394		8.09	0.0303		8.08	0.0255
8.1	0.0396		8.1	0.0303		8.09	0.0256
8.11	0.0398		8.11	0.0305		8.1	0.0257
8.12	0.04		8.12	0.0306		8.11	0.0259
8.12	0.0402		8.12	0.0309		8.12	0.026
8.13	0.0404		8.13	0.0311		8.12	0.0262
8.14	0.0407		8.14	0.0314		8.13	0.0263
8.15	0.041		8.15	0.0315		8.14	0.0265
8.16	0.0412		8.16	0.0317		8.15	0.0267
8.17	0.0416		8.17	0.0319		8.16	0.0269
8.17	0.0419		8.17	0.0322		8.17	0.0272
8.18	0.0424		8.18	0.0328		8.17	0.0275
8.19	0.0429		8.19	0.0332		8.18	0.0278
8.2	0.0434		8.2	0.0337		8.19	0.0281
8.21	0.044		8.21	0.0343		8.2	0.0285
8.22	0.0447		8.22	0.0347		8.21	0.0289
8.22	0.0455		8.22	0.0355		8.22	0.0293
8.23	0.0464		8.23	0.0364		8.22	0.0297
8.24	0.0474		8.24	0.0375		8.23	0.0302
8.25	0.0487		8.25	0.0385		8.24	0.0307
8.26	0.0503		8.26	0.0397		8.25	0.0313
8.27	0.0521		8.27	0.0413		8.26	0.0318
8.27	0.054		8.27	0.0431		8.27	0.0325
8.28	0.0561		8.28	0.0452		8.27	0.0332
8.29	0.0582		8.29	0.0473		8.28	0.0339
8.3	0.06		8.3	0.0496		8.29	0.0347
8.31	0.0613		8.31	0.0516		8.3	0.0356
8.32	0.0617		8.32	0.0529		8.31	0.0366
8.32	0.0615		8.32	0.0527		8.32	0.0377
8.33	0.0608		8.33	0.0513		8.32	0.0388
8.33	0.0169		8.33	0.016		8.33	0.0396
8.34	0.0052		8.34	0.005		8.33	0.0124
8.35	0.0042		8.35	0.0041		8.34	0.0041
8.35	0.0037		8.35	-0.0298		8.35	0.0033
8.36	-0.0449		8.36	-0.0369		8.35	0.0033
8.37	-0.0442		8.37	-0.0359		8.36	-0.0298
8.37	-0.0433		8.37	-0.0347		8.37	-0.0298
8.38	-0.0426		8.38	-0.0337		8.37	-0.0293
8.39	-0.0421		8.39	-0.0328		8.38	-0.0287
8.4	-0.0416		8.4	-0.0322		8.39	-0.0282
8.41	-0.0413		8.41	-0.0318		8.4	-0.0277
8.42	-0.041		8.42	-0.0312		8.41	-0.0274
8.42	-0.0408		8.42	-0.0309		8.42	-0.027
8.43	-0.0406		8.43	-0.0306		8.42	-0.0267
8.44	-0.0404		8.44	-0.0304		8.43	-0.0264
8.45	-0.0402		8.45	-0.0303		8.44	-0.0262
8.46	-0.0401		8.46	-0.0302		8.45	-0.026
8.47	-0.04		8.47	-0.03		8.46	-0.0258
8.47	-0.0399		8.47	-0.0299		8.47	-0.0256
8.48	-0.0399		8.48	-0.0297		8.47	-0.0255
8.49	-0.0398		8.49	-0.0295		8.48	-0.0254
8.5	-0.0397		8.5	-0.0295		8.49	-0.0253
8.51	-0.0397		8.51	-0.0295		8.5	-0.0252
8.52	-0.0396		8.52	-0.0294		8.51	-0.0252
8.52	-0.0396		8.52	-0.0295		8.52	-0.0252
8.53	-0.0396		8.53	-0.0294		8.52	-0.0251
8.54	-0.0395		8.54	-0.0295		8.53	-0.0251
8.55	-0.0395		8.55	-0.0294		8.54	-0.0251
8.56	-0.0395		8.56	-0.0294		8.55	-0.0251
8.57	-0.0396		8.57	-0.0294		8.56	-0.0252
8.57	-0.0395		8.57	-0.0294		8.57	-0.0252
8.58	-0.0395		8.58	-0.0295		8.57	-0.0253
8.59	-0.0395		8.59	-0.0296		8.58	-0.0253
8.6	-0.0396		8.6	-0.0298		8.59	-0.0254
8.61	-0.0396		8.61	-0.0298		8.6	-0.0255
8.62	-0.0397		8.62	-0.0297		8.61	-0.0255
8.62	-0.0397		8.62	-0.0299		8.62	-0.0256
8.63	-0.0398		8.63	-0.0299		8.62	-0.0257
8.64	-0.0398		8.64	-0.0301		8.63	-0.0258
8.65	-0.0399		8.65	-0.0303		8.64	-0.0259
8.66	-0.04		8.66	-0.0304		8.65	-0.026
8.67	-0.04		8.67	-0.0304		8.66	-0.0261
8.67	-0.0402		8.67	-0.0306		8.67	-0.0263
8.68	-0.0403		8.68	-0.0308		8.67	-0.0264
8.69	-0.0405		8.69	-0.0309		8.68	-0.0265
8.7	-0.0407		8.7	-0.0312		8.69	-0.0267
8.71	-0.0409		8.71	-0.0314		8.7	-0.0268
8.72	-0.0411		8.72	-0.0316		8.71	-0.027
8.72	-0.0414		8.72	-0.0319		8.72	-0.0271
8.73	-0.0418		8.73	-0.0323		8.72	-0.0273
8.74	-0.0421		8.74	-0.0326		8.73	-0.0275
8.75	-0.0425		8.75	-0.0329		8.74	-0.0277
8.76	-0.043		8.76	-0.0332		8.75	-0.028
8.77	-0.0436		8.77	-0.0336		8.76	-0.0282
8.77	-0.0443		8.77	-0.034		8.77	-0.0285
8.78	-0.0451		8.78	-0.0346		8.77	-0.0288
8.79	-0.0461		8.79	-0.035		8.78	-0.0292
8.8	-0.0471		8.8	-0.0358		8.79	-0.0295
8.81	-0.0484		8.81	-0.0365		8.8	-0.0299
8.82	-0.0498		8.82	-0.0372		8.81	-0.0304
8.82	-0.0513		8.82	-0.038		8.82	-0.0309
8.83	-0.0531		8.83	-0.039		8.82	-0.0315
8.84	-0.0549		8.84	-0.0401		8.83	-0.0321
8.85	-0.0564		8.85	-0.041		8.84	-0.0328
8.85	-0.0171		8.85	-0.0135		8.85	-0.0335
8.86	-0.005		8.86	-0.004		8.85	-0.0116
8.87	-0.0037		8.87	-0.003		8.86	-0.0032
8.87	0.0343		8.87	0.0221		8.87	-0.0023
8.87	0.0427		8.87	0.0307		8.87	-0.0021
8.88	0.0424		8.88	0.0311		8.87	0.026
8.89	0.0417		8.89	0.031		8.88	0.0264
8.9	0.041		8.9	0.0307		8.89	0.0262
8.91	0.0404		8.91	0.0306		8.9	0.026
8.92	0.0398		8.92	0.0304		8.91	0.0258
8.92	0.0393		8.92	0.0302		8.92	0.0256
8.93	0.0389		8.93	0.0298		8.92	0.0254
8.94	0.0387		8.94	0.0297		8.93	0.0253
8.95	0.0384		8.95	0.0294		8.94	0.0252
8.96	0.0382		8.96	0.0292		8.95	0.025
8.97	0.0381		8.97	0.0292		8.96	0.025
8.97	0.0379		8.97	0.0291		8.97	0.0249
8.98	0.0378		8.98	0.029		8.97	0.0248
8.99	0.0378		8.99	0.0289		8.98	0.0248
9	0.0378		9	0.0287		8.99	0.0247
9.01	0.0378		9.01	0.0287		9	0.0247
9.02	0.0378		9.02	0.0287		9.01	0.0246
9.02	0.0379		9.02	0.0287		9.02	0.0246
9.03	0.0379		9.03	0.0288		9.02	0.0246
9.04	0.0379		9.04	0.0289		9.03	0.0246
9.05	0.038		9.05	0.0288		9.04	0.0246
9.06	0.0381		9.06	0.0288		9.05	0.0246
9.07	0.0382		9.07	0.0289		9.06	0.0247
9.07	0.0382		9.07	0.029		9.07	0.0247
9.08	0.0383		9.08	0.0291		9.07	0.0248
9.09	0.0384		9.09	0.0291		9.08	0.0248
9.1	0.0385		9.1	0.0292		9.09	0.0249
9.11	0.0386		9.11	0.0294		9.1	0.025
9.12	0.0388		9.12	0.0294		9.11	0.0251
9.12	0.0389		9.12	0.0296		9.12	0.0251
9.13	0.0391		9.13	0.0298		9.12	0.0253
9.14	0.0392		9.14	0.03		9.13	0.0254
9.15	0.0394		9.15	0.03		9.14	0.0255
9.16	0.0396		9.16	0.0302		9.15	0.0257
9.17	0.0398		9.17	0.0304		9.16	0.0258
9.17	0.0401		9.17	0.0307		9.17	0.026
9.18	0.0404		9.18	0.031		9.17	0.0262
9.19	0.0407		9.19	0.0311		9.18	0.0264
9.2	0.041		9.2	0.0314		9.19	0.0266
9.21	0.0414		9.21	0.0318		9.2	0.0269
9.22	0.0418		9.22	0.0321		9.21	0.0272
9.22	0.0423		9.22	0.0325		9.22	0.0275
9.23	0.0428		9.23	0.033		9.22	0.0278
9.24	0.0433		9.24	0.0336		9.23	0.0281
9.25	0.044		9.25	0.034		9.24	0.0285
9.26	0.0448		9.26	0.0348		9.25	0.0289
9.27	0.0457		9.27	0.0355		9.26	0.0293
9.27	0.0467		9.27	0.0363		9.27	0.0298
9.28	0.0479		9.28	0.0374		9.27	0.0302
9.29	0.0492		9.29	0.0387		9.28	0.0307
9.3	0.0507		9.3	0.0401		9.29	0.0313
9.31	0.0525		9.31	0.0418		9.3	0.0319
9.32	0.0543		9.32	0.0438		9.31	0.0325
9.32	0.0565		9.32	0.0458		9.32	0.0332
9.33	0.0584		9.33	0.0483		9.32	0.034
9.34	0.0602		9.34	0.0505		9.33	0.0349
9.35	0.0613		9.35	0.0525		9.34	0.0359
9.36	0.0618		9.36	0.0529		9.35	0.037
9.37	0.0615		9.37	0.0519		9.36	0.0382
9.37	0.0178		9.37	0.0162		9.37	0.0392
9.37	0.0053		9.37	0.005		9.37	0.0139
9.38	0.0041		9.38	0.0042		9.37	0.004
9.38	-0.0392		9.38	-0.0305		9.38	0.0032
9.39	-0.0449		9.39	-0.0373		9.38	-0.0057
9.4	-0.0439		9.4	-0.0358		9.39	-0.0297
9.41	-0.0429		9.41	-0.0343		9.4	-0.0296
9.42	-0.0421		9.42	-0.0332		9.41	-0.029
9.42	-0.0416		9.42	-0.0323		9.42	-0.0284
9.43	-0.0411		9.43	-0.0318		9.42	-0.0279
9.44	-0.0407		9.44	-0.0312		9.43	-0.0275
9.45	-0.0405		9.45	-0.0307		9.44	-0.0272
9.46	-0.0402		9.46	-0.0304		9.45	-0.0269
9.47	-0.04		9.47	-0.0301		9.46	-0.0266
9.47	-0.0399		9.47	-0.0299		9.47	-0.0263
9.48	-0.0397		9.48	-0.0298		9.47	-0.0261
9.49	-0.0396		9.49	-0.0296		9.48	-0.0259
9.5	-0.0395		9.5	-0.0294		9.49	-0.0257
9.51	-0.0394		9.51	-0.0295		9.5	-0.0256
9.52	-0.0393		9.52	-0.0292		9.51	-0.0255
9.52	-0.0392		9.52	-0.0291		9.52	-0.0253
9.53	-0.0393		9.53	-0.0291		9.52	-0.0252
9.54	-0.0392		9.54	-0.029		9.53	-0.0251
9.55	-0.0391		9.55	-0.0291		9.54	-0.0251
9.56	-0.0391		9.56	-0.0291		9.55	-0.0251
9.57	-0.0391		9.57	-0.0291		9.56	-0.0251
9.57	-0.0391		9.57	-0.0289		9.57	-0.0251
9.58	-0.0391		9.58	-0.0289		9.57	-0.0251
9.59	-0.0391		9.59	-0.029		9.58	-0.0251
9.6	-0.0391		9.6	-0.0289		9.59	-0.0252
9.61	-0.0391		9.61	-0.0291		9.6	-0.0252
9.62	-0.0391		9.62	-0.029		9.61	-0.0252
9.62	-0.0392		9.62	-0.029		9.62	-0.0252
9.63	-0.0392		9.63	-0.0292		9.62	-0.0253
9.64	-0.0392		9.64	-0.0291		9.63	-0.0254
9.65	-0.0391		9.65	-0.0293		9.64	-0.0255
9.66	-0.0391		9.66	-0.0295		9.65	-0.0256
9.67	-0.0392		9.67	-0.0293		9.66	-0.0257
9.67	-0.0393		9.67	-0.0294		9.67	-0.0258
9.68	-0.0393		9.68	-0.0297		9.67	-0.0259
9.69	-0.0395		9.69	-0.0298		9.68	-0.026
9.7	-0.0396		9.7	-0.0298		9.69	-0.0261
9.71	-0.0396		9.71	-0.0301		9.7	-0.0262
9.72	-0.0398		9.72	-0.0302		9.71	-0.0263
9.72	-0.04		9.72	-0.0302		9.72	-0.0264
9.73	-0.0401		9.73	-0.0305		9.72	-0.0265
9.74	-0.0404		9.74	-0.0306		9.73	-0.0267
9.75	-0.0406		9.75	-0.0308		9.74	-0.0268
9.76	-0.0408		9.76	-0.0312		9.75	-0.027
9.77	-0.0412		9.77	-0.0314		9.76	-0.0271
9.77	-0.0415		9.77	-0.0317		9.77	-0.0273
9.78	-0.0418		9.78	-0.032		9.77	-0.0275
9.79	-0.0423		9.79	-0.0323		9.78	-0.0277
9.8	-0.0428		9.8	-0.0329		9.79	-0.0279
9.81	-0.0435		9.81	-0.0332		9.8	-0.0282
9.82	-0.0443		9.82	-0.0339		9.81	-0.0285
9.82	-0.0452		9.82	-0.0345		9.82	-0.0288
9.83	-0.0462		9.83	-0.035		9.82	-0.0292
9.84	-0.0475		9.84	-0.0358		9.83	-0.0296
9.85	-0.0489		9.85	-0.0365		9.84	-0.03
9.86	-0.0505		9.86	-0.0374		9.85	-0.0305
9.87	-0.0523		9.87	-0.0385		9.86	-0.031
9.87	-0.0542		9.87	-0.0396		9.87	-0.0316
9.88	-0.0559		9.88	-0.0406		9.87	-0.0324
9.88	-0.018		9.88	-0.0405		9.88	-0.0331
9.89	-0.005		9.88	-0.013		9.88	-0.0109
9.9	-0.0037		9.89	-0.0041		9.89	-0.0031
9.9	-0.0032		9.9	-0.0028		9.9	-0.0022
9.91	0.0423		9.9	0.0222		9.9	0.0176
9.92	0.0419		9.91	0.0306		9.91	0.0257
9.92	0.0412		9.92	0.031		9.92	0.0261
9.93	0.0404		9.92	0.0306		9.92	0.026
9.94	0.0397		9.93	0.0304		9.93	0.0257
9.95	0.0391		9.94	0.0302		9.94	0.0255
9.96	0.0387		9.95	0.0298		9.95	0.0253
9.97	0.0383		9.96	0.0295		9.96	0.0252
9.97	0.038		9.97	0.0292		9.97	0.025
9.98	0.0377		9.97	0.0289		9.97	0.0249
9.99	0.0375		9.98	0.0287		9.98	0.0248
10	0.0374		9.99	0.0286		9.99	0.0247
10.01	0.0373		10	0.0284		10	0.0247
10.02	0.0371		10.01	0.0284		10.01	0.0246
10.02	0.0371		10.02	0.0282		10.02	0.0245
10.03	0.0371		10.02	0.0283		10.02	0.0245
10.04	0.0371		10.03	0.0282		10.03	0.0244
10.05	0.0371		10.04	0.028		10.04	0.0244
10.06	0.0371		10.05	0.0282		10.05	0.0244
10.07	0.0372		10.06	0.0282		10.06	0.0244
10.07	0.0372		10.07	0.0282		10.07	0.0244
10.08	0.0372		10.07	0.0283		10.07	0.0244
10.09	0.0374		10.08	0.0282		10.08	0.0244
10.1	0.0375		10.09	0.0284		10.09	0.0245
10.11	0.0375		10.1	0.0283		10.1	0.0245
10.12	0.0376		10.11	0.0284		10.11	0.0246
10.12	0.0377		10.12	0.0285		10.12	0.0246
10.13	0.0378		10.12	0.0287		10.12	0.0247
10.14	0.0379		10.13	0.0288		10.13	0.0247
10.15	0.038		10.14	0.0289		10.14	0.0248
10.16	0.0382		10.15	0.0291		10.15	0.0249
10.17	0.0383		10.16	0.029		10.16	0.025
10.17	0.0385		10.17	0.0293		10.17	0.0252
10.18	0.0387		10.17	0.0293		10.17	0.0253
10.19	0.0389		10.18	0.0297		10.18	0.0254
10.2	0.0391		10.19	0.0298		10.19	0.0255
10.21	0.0394		10.2	0.0299		10.2	0.0257
10.22	0.0396		10.21	0.0302		10.21	0.0259
10.22	0.0399		10.22	0.0305		10.22	0.0261
10.23	0.0402		10.22	0.0307		10.22	0.0264
10.24	0.0406		10.23	0.031		10.23	0.0266
10.25	0.041		10.24	0.0314		10.24	0.0269
10.26	0.0414		10.25	0.0316		10.25	0.0271
10.27	0.0419		10.26	0.032		10.26	0.0274
10.27	0.0424		10.27	0.0324		10.27	0.0278
10.28	0.043		10.27	0.0328		10.27	0.0281
10.29	0.0437		10.28	0.0334		10.28	0.0285
10.3	0.0445		10.29	0.0342		10.29	0.0289
10.31	0.0455		10.3	0.0349		10.3	0.0293
10.32	0.0465		10.31	0.0355		10.31	0.0297
10.32	0.0477		10.32	0.0365		10.32	0.0301
10.33	0.049		10.32	0.0378		10.32	0.0307
10.34	0.0506		10.33	0.0391		10.33	0.0311
10.35	0.0524		10.34	0.0407		10.34	0.0317
10.36	0.0545		10.35	0.0425		10.35	0.0324
10.37	0.0567		10.36	0.0448		10.36	0.0332
10.37	0.0587		10.37	0.0471		10.37	0.0341
10.38	0.0604		10.37	0.0496		10.37	0.0351
10.39	0.0616		10.38	0.0521		10.38	0.0363
10.4	0.0614		10.39	0.053		10.39	0.0378
10.4	0.0266		10.4	0.052		10.4	0.0391
10.41	0.0052		10.4	0.0158		10.4	0.0126
10.41	0.0041		10.41	0.0049		10.41	0.004
10.41	0.0037		10.42	0.004		10.42	0.0032
10.42	-0.0444		10.42	-0.0311		10.42	-0.0254
10.43	-0.0431		10.42	-0.0372		10.42	-0.0295
10.44	-0.0419		10.43	-0.0354		10.43	-0.0291
10.45	-0.041		10.44	-0.0338		10.44	-0.0284
10.46	-0.0404		10.45	-0.0328		10.45	-0.0278
10.46	-0.04		10.46	-0.0318		10.46	-0.0273
10.47	-0.0396		10.47	-0.0313		10.47	-0.0269
10.48	-0.0393		10.47	-0.0306		10.47	-0.0266
10.49	-0.0391		10.48	-0.0303		10.48	-0.0262
10.5	-0.0388		10.49	-0.0299		10.49	-0.026
10.51	-0.0387		10.5	-0.0297		10.5	-0.0258
10.52	-0.0385		10.51	-0.0294		10.51	-0.0255
10.52	-0.0384		10.52	-0.0292		10.52	-0.0254
10.53	-0.0382		10.52	-0.0291		10.52	-0.0252
10.54	-0.0381		10.53	-0.0289		10.53	-0.0251
10.55	-0.038		10.54	-0.0288		10.54	-0.025
10.56	-0.038		10.55	-0.0289		10.55	-0.0248
10.56	-0.0379		10.56	-0.0288		10.56	-0.0247
10.57	-0.0379		10.57	-0.0288		10.57	-0.0247
10.58	-0.0378		10.57	-0.0287		10.57	-0.0247
10.59	-0.0378		10.58	-0.0287		10.58	-0.0247
10.6	-0.0378		10.59	-0.0285		10.59	-0.0247
10.61	-0.0378		10.6	-0.0287		10.6	-0.0247
10.62	-0.0378		10.61	-0.0285		10.61	-0.0247
10.62	-0.0378		10.62	-0.0284		10.62	-0.0247
10.63	-0.0378		10.62	-0.0284		10.62	-0.0248
10.64	-0.0378		10.63	-0.0285		10.63	-0.0248
10.65	-0.0378		10.64	-0.0286		10.64	-0.0248
10.66	-0.0379		10.65	-0.0287		10.65	-0.0249
10.66	-0.0379		10.66	-0.0287		10.66	-0.025
10.67	-0.038		10.67	-0.0287		10.67	-0.025
10.68	-0.038		10.67	-0.0288		10.67	-0.0251
10.69	-0.0381		10.68	-0.0288		10.68	-0.0251
10.7	-0.0382		10.69	-0.029		10.69	-0.0252
10.71	-0.0382		10.7	-0.0289		10.7	-0.0253
10.71	-0.0383		10.71	-0.0292		10.71	-0.0254
10.72	-0.0384		10.72	-0.0291		10.72	-0.0255
10.73	-0.0385		10.72	-0.0293		10.72	-0.0256
10.74	-0.0386		10.73	-0.0294		10.73	-0.0257
10.75	-0.0387		10.74	-0.0294		10.74	-0.0259
10.76	-0.0388		10.75	-0.0297		10.75	-0.026
10.77	-0.039		10.76	-0.0297		10.76	-0.0261
10.77	-0.0393		10.77	-0.0299		10.77	-0.0263
10.78	-0.0394		10.77	-0.0301		10.77	-0.0264
10.79	-0.0397		10.78	-0.0303		10.78	-0.0265
10.8	-0.04		10.79	-0.0306		10.79	-0.0267
10.81	-0.0404		10.8	-0.0308		10.8	-0.0269
10.81	-0.0407		10.81	-0.0312		10.81	-0.027
10.82	-0.0412		10.82	-0.0316		10.82	-0.0272
10.83	-0.0417		10.82	-0.0318		10.82	-0.0274
10.84	-0.0423		10.83	-0.0322		10.83	-0.0277
10.85	-0.043		10.84	-0.0327		10.84	-0.028
10.86	-0.0439		10.85	-0.0334		10.85	-0.0283
10.87	-0.0449		10.86	-0.034		10.86	-0.0286
10.87	-0.0461		10.87	-0.0345		10.87	-0.029
10.88	-0.0475		10.87	-0.0352		10.87	-0.0294
10.89	-0.0492		10.88	-0.036		10.88	-0.0299
10.9	-0.051		10.89	-0.0371		10.89	-0.0304
10.91	-0.0531		10.9	-0.0381		10.9	-0.0311
10.91	-0.055		10.91	-0.0394		10.91	-0.0319
10.91	-0.0193		10.92	-0.0405		10.92	-0.0327
10.92	-0.0049		10.92	-0.0405		10.92	-0.0116
10.93	-0.0036		10.92	-0.013		10.92	-0.0031
10.93	-0.0032		10.92	-0.0039		10.93	-0.0022
10.94	0.0415		10.93	-0.0028		10.93	-0.0021
10.95	0.0411		10.93	0.0224		10.94	0.0256
10.96	0.0403		10.94	0.0305		10.95	0.026
10.96	0.0395		10.95	0.0308		10.96	0.0258
10.97	0.0387		10.96	0.0308		10.97	0.0257
10.98	0.0381		10.97	0.0305		10.97	0.0254
10.99	0.0376		10.97	0.03		10.98	0.0253
11	0.0372		10.98	0.0298		10.99	0.0251
11.01	0.0369		10.99	0.0295		11	0.0249
11.01	0.0367		11	0.0291		11.01	0.0248
11.02	0.0364		11.01	0.0288		11.02	0.0247
11.03	0.0363		11.02	0.0287		11.02	0.0246
11.04	0.0362		11.02	0.0285		11.03	0.0245
11.05	0.0361		11.03	0.0282		11.04	0.0244
11.06	0.036		11.04	0.0283		11.05	0.0244
11.06	0.036		11.05	0.0281		11.06	0.0243
11.07	0.036		11.06	0.028		11.07	0.0243
11.08	0.0361		11.07	0.0279		11.07	0.0243
11.09	0.0361		11.07	0.028		11.08	0.0243
11.1	0.0362		11.08	0.028		11.09	0.0243
11.11	0.0363		11.09	0.0279		11.1	0.0243
11.11	0.0363		11.1	0.028		11.11	0.0243
11.12	0.0364		11.11	0.028		11.12	0.0243
11.13	0.0365		11.12	0.0282		11.12	0.0243
11.14	0.0366		11.12	0.0281		11.13	0.0244
11.15	0.0367		11.13	0.0281		11.14	0.0244
11.16	0.0368		11.14	0.0283		11.15	0.0245
11.16	0.0369		11.15	0.0283		11.16	0.0246
11.17	0.037		11.16	0.0284		11.17	0.0247
11.18	0.0371		11.17	0.0284		11.17	0.0247
11.19	0.0373		11.17	0.0286		11.18	0.0249
11.2	0.0374		11.18	0.0286		11.19	0.025
11.21	0.0376		11.19	0.0288		11.2	0.0251
11.21	0.0378		11.2	0.0288		11.21	0.0253
11.22	0.038		11.21	0.0291		11.22	0.0254
11.23	0.0382		11.22	0.0292		11.22	0.0255
11.24	0.0384		11.22	0.0294		11.23	0.0257
11.25	0.0387		11.23	0.0296		11.24	0.0259
11.26	0.039		11.24	0.0299		11.25	0.026
11.26	0.0393		11.25	0.03		11.26	0.0262
11.27	0.0396		11.26	0.0302		11.27	0.0265
11.28	0.04		11.27	0.0306		11.27	0.0267
11.29	0.0404		11.27	0.0309		11.28	0.027
11.3	0.0408		11.28	0.0311		11.29	0.0273
11.31	0.0413		11.29	0.0317		11.3	0.0275
11.31	0.042		11.3	0.032		11.31	0.0279
11.32	0.0427		11.31	0.0324		11.32	0.0282
11.33	0.0433		11.32	0.033		11.32	0.0286
11.34	0.0442		11.32	0.0335		11.33	0.029
11.35	0.0453		11.33	0.0341		11.34	0.0294
11.36	0.0463		11.34	0.0348		11.35	0.0298
11.36	0.0477		11.35	0.0358		11.36	0.0303
11.37	0.0491		11.36	0.0366		11.37	0.0309
11.38	0.0509		11.37	0.0378		11.37	0.0314
11.39	0.0528		11.37	0.0392		11.38	0.0321
11.4	0.0549		11.38	0.0408		11.39	0.0329
11.41	0.0572		11.39	0.0429		11.4	0.0338
11.41	0.0594		11.4	0.0456		11.41	0.0348
11.42	0.0613		11.41	0.0483		11.42	0.036
11.43	0.0616		11.42	0.0513		11.42	0.0376
11.43	0.0167		11.42	0.0529		11.43	0.0391
11.44	0.0051		11.43	0.0521		11.43	0.012
11.45	0.004		11.43	0.016		11.44	0.004
11.45	0.0036		11.44	0.0048		11.45	0.0031
11.46	-0.0441		11.45	0.004		11.45	0.0031
11.46	-0.0424		11.45	-0.0317		11.46	-0.0295
11.47	-0.0411		11.46	-0.0368		11.47	-0.0289
11.48	-0.0402		11.47	-0.0348		11.47	-0.0282
11.49	-0.0396		11.47	-0.0332		11.48	-0.0276
11.5	-0.0391		11.48	-0.0321		11.49	-0.0271
11.51	-0.0388		11.49	-0.0312		11.5	-0.0267
11.51	-0.0385		11.5	-0.0307		11.51	-0.0264
11.52	-0.0382		11.51	-0.0302		11.52	-0.0261
11.53	-0.038		11.52	-0.0297		11.52	-0.0257
11.54	-0.0379		11.52	-0.0294		11.53	-0.0255
11.55	-0.0377		11.53	-0.0292		11.54	-0.0253
11.56	-0.0376		11.54	-0.029		11.55	-0.0251
11.56	-0.0375		11.55	-0.0288		11.56	-0.0249
11.57	-0.0374		11.56	-0.0287		11.57	-0.0248
11.58	-0.0373		11.57	-0.0285		11.57	-0.0247
11.59	-0.0372		11.57	-0.0285		11.58	-0.0247
11.6	-0.0372		11.58	-0.0283		11.59	-0.0246
11.61	-0.0371		11.59	-0.0282		11.6	-0.0245
11.61	-0.0371		11.6	-0.0282		11.61	-0.0245
11.62	-0.037		11.61	-0.0282		11.62	-0.0245
11.63	-0.037		11.62	-0.0282		11.62	-0.0245
11.64	-0.0371		11.62	-0.0282		11.63	-0.0245
11.65	-0.0371		11.63	-0.0281		11.64	-0.0245
11.66	-0.037		11.64	-0.028		11.65	-0.0245
11.66	-0.0371		11.65	-0.0281		11.66	-0.0245
11.67	-0.0371		11.66	-0.0279		11.67	-0.0245
11.68	-0.0372		11.67	-0.0279		11.67	-0.0246
11.69	-0.0372		11.67	-0.0281		11.68	-0.0247
11.7	-0.0372		11.68	-0.0281		11.69	-0.0247
11.71	-0.0373		11.69	-0.0281		11.7	-0.0248
11.71	-0.0374		11.7	-0.0283		11.71	-0.0249
11.72	-0.0374		11.71	-0.0284		11.72	-0.025
11.73	-0.0375		11.72	-0.0285		11.72	-0.0251
11.74	-0.0376		11.72	-0.0284		11.73	-0.0251
11.75	-0.0376		11.73	-0.0285		11.74	-0.0252
11.76	-0.0377		11.74	-0.0286		11.75	-0.0253
11.76	-0.0378		11.75	-0.0288		11.76	-0.0255
11.77	-0.0379		11.76	-0.029		11.77	-0.0255
11.78	-0.038		11.77	-0.0291		11.77	-0.0256
11.79	-0.0382		11.77	-0.0292		11.78	-0.0257
11.8	-0.0383		11.78	-0.0294		11.79	-0.0258
11.81	-0.0386		11.79	-0.0295		11.8	-0.026
11.81	-0.0388		11.8	-0.0298		11.81	-0.0261
11.82	-0.039		11.81	-0.0299		11.82	-0.0262
11.83	-0.0393		11.82	-0.0302		11.82	-0.0264
11.84	-0.0396		11.82	-0.0303		11.83	-0.0266
11.85	-0.04		11.83	-0.0308		11.84	-0.0268
11.86	-0.0405		11.84	-0.0308		11.85	-0.027
11.86	-0.041		11.85	-0.0312		11.86	-0.0272
11.87	-0.0416		11.86	-0.0315		11.87	-0.0275
11.88	-0.0423		11.87	-0.0318		11.87	-0.0277
11.89	-0.0432		11.87	-0.0325		11.88	-0.028
11.9	-0.0442		11.88	-0.0329		11.89	-0.0284
11.91	-0.0454		11.89	-0.0333		11.9	-0.0287
11.91	-0.0468		11.9	-0.034		11.91	-0.0291
11.92	-0.0485		11.91	-0.0347		11.92	-0.0297
11.93	-0.0504		11.92	-0.0355		11.92	-0.0302
11.94	-0.0526		11.92	-0.0365		11.93	-0.0309
11.95	-0.0545		11.93	-0.0378		11.94	-0.0317
11.95	-0.0162		11.94	-0.0391		11.95	-0.0325
11.96	-0.0048		11.95	-0.0404		11.95	-0.0116
11.96	-0.0035		11.95	-0.0404		11.96	-0.0031
11.96	0.0337		11.95	-0.0128		11.97	-0.0022
11.97	0.0411		11.96	-0.0039		11.97	-0.0021
11.98	0.0405		11.97	-0.0029		11.97	0.0256
11.99	0.0397		11.97	0.0223		11.98	0.026
12	0.0389		11.97	0.0305		11.99	0.0258
12.01	0.0382		11.98	0.0305		12	0.0256
12.01	0.0376		11.99	0.0303		12.01	0.0254
12.02	0.0371		12	0.0299		12.02	0.0252
12.03	0.0367		12.01	0.0296		12.02	0.025
12.04	0.0363		12.02	0.0293		12.03	0.0249
12.05	0.0361		12.03	0.029		12.04	0.0247
12.06	0.0359		12.03	0.0285		12.05	0.0246
12.06	0.0358		12.04	0.0284		12.06	0.0245
12.07	0.0356		12.05	0.028		12.07	0.0244
12.08	0.0356		12.06	0.0278		12.07	0.0244
12.09	0.0355		12.07	0.0277		12.08	0.0243
12.1	0.0355		12.07	0.0277		12.09	0.0243
12.11	0.0355		12.08	0.0273		12.1	0.0243
12.11	0.0356		12.09	0.0273		12.11	0.0242
12.12	0.0356		12.1	0.0274		12.12	0.0242
12.13	0.0356		12.11	0.0272		12.12	0.0242
12.14	0.0357		12.12	0.0273		12.13	0.0243
12.15	0.0358		12.12	0.0273		12.14	0.0243
12.16	0.0358		12.13	0.0273		12.15	0.0243
12.16	0.0359		12.14	0.0273		12.16	0.0243
12.17	0.036		12.15	0.0273		12.17	0.0244
12.18	0.0362		12.16	0.0273		12.17	0.0244
12.19	0.0363		12.17	0.0274		12.18	0.0245
12.2	0.0364		12.18	0.0274		12.19	0.0246
12.21	0.0365		12.18	0.0276		12.2	0.0247
12.21	0.0366		12.19	0.0276		12.21	0.0247
12.22	0.0368		12.2	0.0277		12.22	0.0248
12.23	0.037		12.21	0.0278		12.22	0.0249
12.24	0.0371		12.22	0.028		12.23	0.025
12.25	0.0373		12.22	0.0281		12.24	0.0251
12.26	0.0375		12.23	0.0283		12.25	0.0252
12.26	0.0377		12.24	0.0284		12.26	0.0254
12.27	0.038		12.25	0.0287		12.27	0.0255
12.28	0.0382		12.26	0.0287		12.27	0.0257
12.29	0.0385		12.27	0.0289		12.28	0.0259
12.3	0.0387		12.28	0.0291		12.29	0.0261
12.31	0.0391		12.28	0.0295		12.3	0.0263
12.31	0.0394		12.29	0.0298		12.31	0.0265
12.32	0.0398		12.3	0.03		12.32	0.0267
12.33	0.0403		12.31	0.0302		12.32	0.027
12.34	0.0408		12.32	0.0305		12.33	0.0273
12.35	0.0414		12.32	0.0309		12.34	0.0276
12.36	0.042		12.33	0.0314		12.35	0.0279
12.36	0.0427		12.34	0.0318		12.36	0.0283
12.37	0.0435		12.35	0.0323		12.37	0.0287
12.38	0.0444		12.36	0.0327		12.37	0.0291
12.39	0.0454		12.37	0.0334		12.38	0.0296
12.4	0.0466		12.38	0.034		12.39	0.03
12.41	0.0479		12.38	0.0347		12.4	0.0306
12.41	0.0495		12.39	0.0358		12.41	0.0311
12.42	0.0513		12.4	0.0367		12.42	0.0319
12.43	0.0533		12.41	0.0382		12.42	0.0326
12.44	0.0558		12.42	0.0396		12.43	0.0336
12.45	0.0585		12.43	0.0418		12.44	0.0346
12.46	0.061		12.43	0.0443		12.45	0.0361
12.46	0.0619		12.44	0.0472		12.46	0.0378
12.46	0.0171		12.45	0.0504		12.47	0.0391
12.47	0.0051		12.46	0.0527		12.47	0.0181
12.48	0.004		12.47	0.0521		12.47	0.0039
12.48	-0.0416		12.47	0.0158		12.48	0.0031
12.49	-0.0438		12.47	0.0047		12.48	0.003
12.5	-0.0419		12.48	0.0037		12.49	-0.0296
12.51	-0.0407		12.48	-0.0324		12.5	-0.0289
12.51	-0.0398		12.49	-0.0365		12.51	-0.0281
12.52	-0.0391		12.5	-0.0341		12.52	-0.0275
12.53	-0.0386		12.51	-0.0326		12.52	-0.0269
12.54	-0.0383		12.52	-0.0314		12.53	-0.0265
12.55	-0.038		12.53	-0.0306		12.54	-0.0262
12.56	-0.0377		12.53	-0.0301		12.55	-0.0258
12.56	-0.0375		12.54	-0.0294		12.56	-0.0255
12.57	-0.0373		12.55	-0.0291		12.57	-0.0253
12.58	-0.0371		12.56	-0.0289		12.57	-0.0252
12.59	-0.037		12.57	-0.0286		12.58	-0.0249
12.6	-0.0369		12.57	-0.0284		12.59	-0.0249
12.61	-0.0368		12.58	-0.0282		12.6	-0.0247
12.61	-0.0367		12.59	-0.028		12.61	-0.0246
12.62	-0.0367		12.6	-0.0278		12.62	-0.0246
12.63	-0.0366		12.61	-0.0277		12.62	-0.0245
12.64	-0.0366		12.62	-0.0277		12.63	-0.0244
12.65	-0.0365		12.62	-0.0276		12.64	-0.0244
12.66	-0.0364		12.63	-0.0274		12.65	-0.0243
12.66	-0.0364		12.64	-0.0276		12.66	-0.0243
12.67	-0.0364		12.65	-0.0275		12.67	-0.0243
12.68	-0.0364		12.66	-0.0273		12.67	-0.0243
12.69	-0.0364		12.67	-0.0273		12.68	-0.0243
12.7	-0.0364		12.68	-0.0275		12.69	-0.0244
12.71	-0.0365		12.68	-0.0274		12.7	-0.0244
12.71	-0.0365		12.69	-0.0275		12.71	-0.0245
12.72	-0.0365		12.7	-0.0276		12.72	-0.0245
12.73	-0.0366		12.71	-0.0274		12.72	-0.0246
12.74	-0.0367		12.72	-0.0277		12.73	-0.0246
12.75	-0.0367		12.72	-0.0277		12.74	-0.0247
12.76	-0.0368		12.73	-0.0278		12.75	-0.0248
12.76	-0.0368		12.74	-0.0277		12.76	-0.0249
12.77	-0.037		12.75	-0.0278		12.77	-0.025
12.78	-0.037		12.76	-0.0281		12.77	-0.0251
12.79	-0.0372		12.77	-0.0282		12.78	-0.0252
12.8	-0.0372		12.78	-0.0282		12.79	-0.0253
12.81	-0.0374		12.78	-0.0282		12.8	-0.0254
12.81	-0.0375		12.79	-0.0284		12.81	-0.0254
12.82	-0.0377		12.8	-0.0286		12.82	-0.0256
12.83	-0.0378		12.81	-0.0286		12.82	-0.0257
12.84	-0.038		12.82	-0.0288		12.83	-0.0258
12.85	-0.0382		12.82	-0.0291		12.84	-0.026
12.86	-0.0385		12.83	-0.0293		12.85	-0.0261
12.86	-0.0387		12.84	-0.0295		12.86	-0.0263
12.87	-0.039		12.85	-0.0297		12.87	-0.0264
12.88	-0.0394		12.86	-0.03		12.87	-0.0267
12.89	-0.0398		12.87	-0.0303		12.88	-0.0269
12.9	-0.0403		12.88	-0.0305		12.89	-0.0271
12.91	-0.0409		12.88	-0.0308		12.9	-0.0273
12.91	-0.0416		12.89	-0.0311		12.91	-0.0276
12.92	-0.0425		12.9	-0.0317		12.92	-0.0278
12.93	-0.0435		12.91	-0.0322		12.92	-0.028
12.94	-0.0447		12.92	-0.0327		12.93	-0.0284
12.95	-0.0461		12.93	-0.0331		12.94	-0.0288
12.96	-0.0478		12.93	-0.0339		12.95	-0.0292
12.96	-0.0498		12.94	-0.0346		12.96	-0.0298
12.97	-0.0521		12.95	-0.0355		12.97	-0.0305
12.98	-0.0542		12.96	-0.0365		12.97	-0.0312
12.98	-0.0173		12.97	-0.0376		12.98	-0.0321
12.99	-0.0048		12.97	-0.0389		12.98	-0.0115
13	-0.0034		12.98	-0.0402		12.99	-0.0031
13	-0.003		12.98	-0.0403		13	-0.0021
13.01	0.0407		12.98	-0.0129		13	-0.002
13.01	0.0401		12.99	-0.004		13.01	0.0253
13.02	0.0393		13	-0.0028		13.02	0.0257
13.03	0.0384		13	0.0225		13.02	0.0256
13.04	0.0376		13.01	0.0304		13.03	0.0254
13.05	0.037		13.02	0.0306		13.04	0.0252
13.06	0.0364		13.03	0.0303		13.05	0.025
13.06	0.036		13.03	0.0299		13.06	0.0248
13.07	0.0357		13.04	0.0295		13.07	0.0246
13.08	0.0355		13.05	0.029		13.07	0.0245
13.09	0.0353		13.06	0.0287		13.08	0.0244
13.1	0.0352		13.07	0.0283		13.09	0.0243
13.11	0.0351		13.08	0.0279		13.1	0.0242
13.11	0.035		13.08	0.0279		13.11	0.0241
13.12	0.0349		13.09	0.0275		13.12	0.024
13.13	0.0349		13.1	0.0274		13.12	0.024
13.14	0.0349		13.11	0.0271		13.13	0.024
13.15	0.0349		13.12	0.0271		13.14	0.024
13.16	0.0349		13.13	0.027		13.15	0.024
13.16	0.035		13.13	0.0269		13.16	0.024
13.17	0.0351		13.14	0.0267		13.17	0.024
13.18	0.0351		13.15	0.0267		13.17	0.024
13.19	0.0352		13.16	0.0268		13.18	0.024
13.2	0.0353		13.17	0.0268		13.19	0.0241
13.21	0.0353		13.18	0.0269		13.2	0.0241
13.21	0.0355		13.18	0.0268		13.21	0.0242
13.22	0.0356		13.19	0.0269		13.22	0.0242
13.23	0.0357		13.2	0.0268		13.22	0.0243
13.24	0.0358		13.21	0.027		13.23	0.0243
13.25	0.0359		13.22	0.0272		13.24	0.0244
13.26	0.0361		13.23	0.0271		13.25	0.0245
13.26	0.0362		13.23	0.0272		13.26	0.0246
13.27	0.0364		13.24	0.0273		13.27	0.0247
13.28	0.0365		13.25	0.0274		13.27	0.0248
13.29	0.0368		13.26	0.0275		13.28	0.025
13.3	0.037		13.27	0.0277		13.29	0.0252
13.31	0.0371		13.28	0.0278		13.3	0.0253
13.31	0.0374		13.28	0.0279		13.31	0.0255
13.32	0.0377		13.29	0.0282		13.32	0.0256
13.33	0.0379		13.3	0.0282		13.32	0.0258
13.34	0.0382		13.31	0.0285		13.33	0.026
13.35	0.0385		13.32	0.0286		13.34	0.0262
13.36	0.0389		13.33	0.029		13.35	0.0265
13.36	0.0393		13.33	0.0292		13.36	0.0267
13.37	0.0398		13.34	0.0295		13.37	0.027
13.38	0.0404		13.35	0.0297		13.37	0.0273
13.39	0.0409		13.36	0.0299		13.38	0.0276
13.4	0.0415		13.37	0.0304		13.39	0.0279
13.41	0.0423		13.38	0.0309		13.4	0.0283
13.41	0.043		13.38	0.0313		13.41	0.0287
13.42	0.044		13.39	0.0317		13.42	0.0291
13.43	0.0451		13.4	0.0324		13.42	0.0296
13.44	0.0463		13.41	0.033		13.43	0.0301
13.45	0.0477		13.42	0.0338		13.44	0.0307
13.46	0.0495		13.43	0.0346		13.45	0.0314
13.46	0.0515		13.43	0.0357		13.46	0.0322
13.47	0.0539		13.44	0.037		13.47	0.0331
13.48	0.0568		13.45	0.0384		13.47	0.0343
13.49	0.0599		13.46	0.0403		13.48	0.0357
13.5	0.0617		13.47	0.0428		13.49	0.0374
13.5	0.0258		13.48	0.046		13.5	0.0388
13.51	0.0052		13.48	0.0498		13.5	0.0135
13.51	0.0041		13.49	0.0528		13.51	0.0039
13.51	0.0035		13.5	0.0521		13.52	0.003
13.52	-0.043		13.5	0.0153		13.52	-0.0059
13.53	-0.0411		13.51	0.0047		13.52	-0.0295
13.54	-0.0399		13.52	0.0037		13.53	-0.0288
13.55	-0.0389		13.52	-0.0328		13.54	-0.028
13.56	-0.0383		13.53	-0.0361		13.55	-0.0273
13.56	-0.0377		13.53	-0.0335		13.56	-0.0267
13.57	-0.0374		13.54	-0.0319		13.57	-0.0263
13.58	-0.0371		13.55	-0.0309		13.57	-0.0259
13.59	-0.0368		13.56	-0.03		13.58	-0.0256
13.6	-0.0366		13.57	-0.0293		13.59	-0.0253
13.61	-0.0364		13.58	-0.0287		13.6	-0.0251
13.61	-0.0362		13.58	-0.0285		13.61	-0.0249
13.62	-0.0361		13.59	-0.0281		13.62	-0.0247
13.63	-0.036		13.6	-0.0277		13.62	-0.0246
13.64	-0.0359		13.61	-0.0275		13.63	-0.0245
13.65	-0.0358		13.62	-0.0273		13.64	-0.0244
13.66	-0.0358		13.63	-0.0272		13.65	-0.0243
13.66	-0.0357		13.63	-0.027		13.66	-0.0242
13.67	-0.0357		13.64	-0.0271		13.67	-0.0242
13.68	-0.0357		13.65	-0.0271		13.67	-0.0242
13.69	-0.0356		13.66	-0.0268		13.68	-0.0241
13.7	-0.0357		13.67	-0.0266		13.69	-0.0241
13.71	-0.0357		13.68	-0.0267		13.7	-0.0241
13.71	-0.0357		13.68	-0.0268		13.71	-0.0242
13.72	-0.0357		13.69	-0.0267		13.72	-0.0242
13.73	-0.0357		13.7	-0.0268		13.72	-0.0242
13.74	-0.0358		13.71	-0.0268		13.73	-0.0243
13.75	-0.0358		13.72	-0.0268		13.74	-0.0243
13.76	-0.0359		13.73	-0.0268		13.75	-0.0244
13.76	-0.0359		13.73	-0.027		13.76	-0.0244
13.77	-0.036		13.74	-0.027		13.77	-0.0244
13.78	-0.0361		13.75	-0.0271		13.77	-0.0245
13.79	-0.0361		13.76	-0.027		13.78	-0.0247
13.8	-0.0362		13.77	-0.0273		13.79	-0.0248
13.81	-0.0364		13.78	-0.0273		13.8	-0.0248
13.81	-0.0364		13.78	-0.0275		13.81	-0.0249
13.82	-0.0365		13.79	-0.0276		13.82	-0.025
13.83	-0.0367		13.8	-0.0275		13.82	-0.0251
13.84	-0.0368		13.81	-0.0277		13.83	-0.0252
13.85	-0.0369		13.82	-0.0279		13.84	-0.0253
13.86	-0.0371		13.83	-0.0279		13.85	-0.0254
13.86	-0.0373		13.83	-0.0281		13.86	-0.0256
13.87	-0.0375		13.84	-0.0282		13.87	-0.0257
13.88	-0.0377		13.85	-0.0285		13.87	-0.0258
13.89	-0.0379		13.86	-0.0288		13.88	-0.0259
13.9	-0.0382		13.87	-0.0289		13.89	-0.0261
13.91	-0.0385		13.88	-0.029		13.9	-0.0263
13.91	-0.0389		13.88	-0.0293		13.91	-0.0264
13.92	-0.0393		13.89	-0.0296		13.92	-0.0266
13.93	-0.0398		13.9	-0.0297		13.92	-0.0268
13.94	-0.0404		13.91	-0.0302		13.93	-0.0271
13.95	-0.0411		13.92	-0.0305		13.94	-0.0273
13.96	-0.0419		13.93	-0.0308		13.95	-0.0276
13.96	-0.0429		13.93	-0.0312		13.96	-0.0279
13.97	-0.0441		13.94	-0.0317		13.97	-0.0283
13.98	-0.0456		13.95	-0.0324		13.97	-0.0287
13.99	-0.0473		13.96	-0.0328		13.98	-0.0292
14	-0.0492		13.97	-0.0336		13.99	-0.0297
14.01	-0.0515		13.98	-0.0343		14	-0.0304
14.01	-0.0537		13.98	-0.0352		14.01	-0.0312
14.01	-0.0157		13.99	-0.0362		14.02	-0.0321
14.02	-0.0047		14	-0.0374		14.02	-0.0109
14.03	-0.0034		14.01	-0.0389		14.02	-0.0031
14.03	0.0335		14.02	-0.0401		14.03	-0.0021
14.04	0.0403		14.02	-0.0401		14.03	0.017
14.05	0.0397		14.02	-0.0126		14.04	0.0254
14.06	0.0389		14.03	-0.0039		14.05	0.0258
14.06	0.038		14.03	-0.0028		14.06	0.0257
14.07	0.0373		14.03	0.0226		14.07	0.0255
14.08	0.0366		14.04	0.0304		14.07	0.0253
14.09	0.0361		14.05	0.0305		14.08	0.025
14.1	0.0358		14.06	0.0303		14.09	0.0248
14.11	0.0354		14.07	0.0299		14.1	0.0247
14.11	0.0351		14.08	0.0293		14.11	0.0246
14.12	0.0349		14.08	0.0289		14.12	0.0244
14.13	0.0348		14.09	0.0284		14.12	0.0243
14.14	0.0347		14.1	0.0279		14.13	0.0242
14.15	0.0346		14.11	0.0278		14.14	0.0242
14.16	0.0345		14.12	0.0274		14.15	0.0241
14.16	0.0345		14.13	0.0272		14.16	0.0241
14.17	0.0346		14.13	0.0271		14.17	0.024
14.18	0.0346		14.14	0.027		14.17	0.024
14.19	0.0346		14.15	0.0267		14.18	0.024
14.2	0.0346		14.16	0.0267		14.19	0.024
14.21	0.0347		14.17	0.0265		14.2	0.024
14.21	0.0347		14.18	0.0264		14.21	0.024
14.22	0.0348		14.18	0.0264		14.22	0.024
14.23	0.0349		14.19	0.0265		14.22	0.024
14.24	0.035		14.2	0.0264		14.23	0.0241
14.25	0.0351		14.21	0.0264		14.24	0.0241
14.26	0.0352		14.22	0.0265		14.25	0.0242
14.26	0.0353		14.23	0.0265		14.26	0.0243
14.27	0.0354		14.23	0.0265		14.27	0.0243
14.28	0.0356		14.24	0.0267		14.27	0.0244
14.29	0.0357		14.25	0.0268		14.28	0.0245
14.3	0.0359		14.26	0.0267		14.29	0.0246
14.31	0.036		14.27	0.0269		14.3	0.0247
14.31	0.0362		14.28	0.027		14.31	0.0248
14.32	0.0363		14.28	0.0272		14.32	0.0249
14.33	0.0365		14.29	0.0272		14.32	0.0251
14.34	0.0367		14.3	0.0275		14.33	0.0252
14.35	0.037		14.31	0.0275		14.34	0.0254
14.36	0.0373		14.32	0.0278		14.35	0.0255
14.36	0.0375		14.33	0.028		14.36	0.0257
14.37	0.0378		14.33	0.028		14.37	0.0259
14.38	0.0381		14.34	0.0284		14.37	0.0261
14.39	0.0386		14.35	0.0285		14.38	0.0263
14.4	0.039		14.36	0.0287		14.39	0.0266
14.41	0.0394		14.37	0.029		14.4	0.0269
14.41	0.0399		14.38	0.0293		14.41	0.0271
14.42	0.0404		14.38	0.0296		14.42	0.0274
14.43	0.041		14.39	0.0299		14.42	0.0278
14.44	0.0418		14.4	0.0303		14.43	0.0281
14.45	0.0423		14.41	0.0307		14.44	0.0285
14.46	0.0431		14.42	0.031		14.45	0.029
14.46	0.0441		14.43	0.0316		14.46	0.0293
14.47	0.0453		14.43	0.032		14.47	0.0299
14.48	0.0468		14.44	0.0328		14.47	0.0304
14.49	0.0486		14.45	0.0334		14.48	0.0311
14.5	0.0508		14.46	0.0343		14.49	0.0318
14.51	0.0535		14.47	0.0352		14.5	0.0327
14.51	0.0568		14.48	0.0363		14.51	0.0338
14.52	0.0603		14.48	0.0379		14.52	0.0353
14.53	0.0614		14.49	0.0397		14.52	0.037
14.53	0.0164		14.5	0.0421		14.53	0.0388
14.54	0.0049		14.51	0.0454		14.53	0.0134
14.55	0.0038		14.52	0.0495		14.54	0.0038
14.55	-0.0423		14.53	0.0526		14.55	0.003
14.56	-0.0428		14.53	0.0523		14.55	-0.0059
14.56	-0.0407		14.53	0.0152		14.56	-0.0293
14.57	-0.0394		14.54	0.0046		14.57	-0.0285
14.58	-0.0385		14.55	0.0037		14.57	-0.0277
14.59	-0.0378		14.55	-0.0333		14.58	-0.027
14.6	-0.0372		14.56	-0.036		14.59	-0.0265
14.61	-0.0368		14.57	-0.0333		14.6	-0.0261
14.61	-0.0364		14.58	-0.0316		14.61	-0.0257
14.62	-0.0362		14.58	-0.0306		14.62	-0.0254
14.63	-0.0359		14.59	-0.0297		14.62	-0.0252
14.64	-0.0357		14.6	-0.0293		14.63	-0.0249
14.65	-0.0356		14.61	-0.0286		14.64	-0.0248
14.66	-0.0355		14.62	-0.0282		14.65	-0.0246
14.66	-0.0354		14.63	-0.0281		14.66	-0.0244
14.67	-0.0353		14.63	-0.0277		14.67	-0.0243
14.68	-0.0352		14.64	-0.0275		14.67	-0.0242
14.69	-0.0351		14.65	-0.0274		14.68	-0.0241
14.7	-0.0351		14.66	-0.0271		14.69	-0.0241
14.71	-0.0351		14.67	-0.027		14.7	-0.024
14.71	-0.035		14.68	-0.027		14.71	-0.024
14.72	-0.035		14.68	-0.0268		14.72	-0.024
14.73	-0.035		14.69	-0.0269		14.72	-0.024
14.74	-0.035		14.7	-0.0267		14.73	-0.024
14.75	-0.035		14.71	-0.0269		14.74	-0.024
14.76	-0.035		14.72	-0.0269		14.75	-0.024
14.76	-0.0351		14.73	-0.0269		14.76	-0.024
14.77	-0.0351		14.73	-0.0267		14.77	-0.024
14.78	-0.0351		14.74	-0.0268		14.77	-0.0241
14.79	-0.0352		14.75	-0.0268		14.78	-0.0242
14.8	-0.0352		14.76	-0.0268		14.79	-0.0242
14.81	-0.0353		14.77	-0.0268		14.8	-0.0243
14.81	-0.0354		14.78	-0.0269		14.81	-0.0244
14.82	-0.0355		14.78	-0.0272		14.82	-0.0244
14.83	-0.0355		14.79	-0.0272		14.82	-0.0245
14.84	-0.0356		14.8	-0.0272		14.83	-0.0246
14.85	-0.0357		14.81	-0.0272		14.84	-0.0247
14.86	-0.0359		14.82	-0.0273		14.85	-0.0248
14.86	-0.036		14.83	-0.0275		14.86	-0.0249
14.87	-0.0361		14.83	-0.0274		14.87	-0.0251
14.88	-0.0362		14.84	-0.0276		14.87	-0.0252
14.89	-0.0363		14.85	-0.0277		14.88	-0.0253
14.9	-0.0366		14.86	-0.0277		14.89	-0.0255
14.91	-0.0368		14.87	-0.0279		14.9	-0.0256
14.91	-0.037		14.88	-0.0281		14.91	-0.0257
14.92	-0.0372		14.88	-0.0283		14.92	-0.0259
14.93	-0.0375		14.89	-0.0284		14.92	-0.026
14.94	-0.0378		14.9	-0.0287		14.93	-0.0262
14.95	-0.0381		14.91	-0.0288		14.94	-0.0264
14.96	-0.0386		14.92	-0.0291		14.95	-0.0266
14.96	-0.0391		14.93	-0.0292		14.96	-0.0268
14.97	-0.0397		14.93	-0.0295		14.97	-0.027
14.98	-0.0403		14.94	-0.0299		14.97	-0.0273
14.99	-0.0412		14.95	-0.0302		14.98	-0.0276
15	-0.0422		14.96	-0.0306		14.99	-0.0279
15.01	-0.0433		14.97	-0.0312		15	-0.0282
15.01	-0.0448		14.98	-0.0316		15.01	-0.0286
15.02	-0.0466		14.98	-0.0321		15.02	-0.0291
15.03	-0.0486		14.99	-0.0327		15.02	-0.0296
15.04	-0.051		15	-0.0333		15.03	-0.0303
15.05	-0.0532		15.01	-0.0341		15.04	-0.0312
15.05	-0.0163		15.02	-0.035		15.05	-0.0321
15.06	-0.0046		15.03	-0.0361		15.05	-0.0115
15.06	-0.0033		15.03	-0.0372		15.06	-0.0031
15.06	-0.0028		15.04	-0.0386		15.06	-0.0021
15.07	0.0398		15.05	-0.04		15.06	-0.0019
15.08	0.0391		15.05	-0.04		15.07	0.0254
15.09	0.0382		15.05	-0.0127		15.08	0.0258
15.1	0.0373		15.06	-0.004		15.09	0.0257
15.11	0.0366		15.07	-0.0028		15.1	0.0255
15.11	0.036		15.07	0.0228		15.11	0.0252
15.12	0.0355		15.08	0.0304		15.11	0.025
15.13	0.0351		15.08	0.0303		15.12	0.0248
15.14	0.0347		15.09	0.0301		15.13	0.0246
15.15	0.0345		15.1	0.0295		15.14	0.0245
15.16	0.0343		15.11	0.0291		15.15	0.0243
15.16	0.0342		15.12	0.0288		15.16	0.0242
15.17	0.034		15.13	0.0284		15.16	0.0241
15.18	0.034		15.13	0.0279		15.17	0.0241
15.19	0.0339		15.14	0.0275		15.18	0.0241
15.2	0.0339		15.15	0.0273		15.19	0.024
15.21	0.0339		15.16	0.0271		15.2	0.024
15.21	0.0339		15.17	0.0269		15.21	0.024
15.22	0.0339		15.18	0.0267		15.21	0.024
15.23	0.0339		15.18	0.0266		15.22	0.024
15.24	0.034		15.19	0.0265		15.23	0.024
15.25	0.0341		15.2	0.0265		15.24	0.024
15.26	0.0341		15.21	0.0263		15.25	0.024
15.26	0.0343		15.22	0.0264		15.26	0.024
15.27	0.0343		15.23	0.0263		15.26	0.0241
15.28	0.0344		15.23	0.0264		15.27	0.0241
15.29	0.0345		15.24	0.0264		15.28	0.0242
15.3	0.0346		15.25	0.0264		15.29	0.0242
15.31	0.0347		15.26	0.0265		15.3	0.0243
15.31	0.0349		15.27	0.0266		15.31	0.0244
15.32	0.0351		15.28	0.0267		15.31	0.0245
15.33	0.0352		15.28	0.0267		15.32	0.0246
15.34	0.0354		15.29	0.0267		15.33	0.0246
15.35	0.0355		15.3	0.0268		15.34	0.0247
15.36	0.0357		15.31	0.0269		15.35	0.0248
15.36	0.0359		15.32	0.0271		15.36	0.0249
15.37	0.0361		15.33	0.0273		15.36	0.0251
15.38	0.0363		15.33	0.0272		15.37	0.0252
15.39	0.0366		15.34	0.0273		15.38	0.0254
15.4	0.0369		15.35	0.0276		15.39	0.0256
15.41	0.0372		15.36	0.0277		15.4	0.0258
15.41	0.0375		15.37	0.028		15.41	0.026
15.42	0.0379		15.38	0.0282		15.41	0.0262
15.43	0.0382		15.38	0.0284		15.42	0.0264
15.44	0.0386		15.39	0.0286		15.43	0.0266
15.45	0.0391		15.4	0.0288		15.44	0.0269
15.46	0.0396		15.41	0.029		15.45	0.0272
15.46	0.0402		15.42	0.0293		15.46	0.0275
15.47	0.0409		15.43	0.0298		15.46	0.0279
15.48	0.0416		15.43	0.0301		15.47	0.0283
15.49	0.0425		15.44	0.0305		15.48	0.0287
15.5	0.0436		15.45	0.031		15.49	0.0291
15.51	0.0448		15.46	0.0314		15.5	0.0297
15.51	0.0462		15.47	0.032		15.51	0.0303
15.52	0.0479		15.48	0.0325		15.51	0.031
15.53	0.0499		15.48	0.0333		15.52	0.0317
15.54	0.0526		15.49	0.0341		15.53	0.0327
15.55	0.0559		15.5	0.0351		15.54	0.0339
15.56	0.0598		15.51	0.0362		15.55	0.0353
15.56	0.0617		15.52	0.0376		15.56	0.0369
15.56	0.0157		15.53	0.0396		15.56	0.0385
15.57	0.005		15.53	0.0421		15.56	0.0115
15.58	0.0038		15.54	0.0454		15.57	0.0038
15.58	0.0034		15.55	0.0495		15.58	0.0029
15.59	-0.0426		15.56	0.0524		15.58	0.0028
15.6	-0.0405		15.57	0.0523		15.59	-0.0294
15.61	-0.0392		15.57	0.0154		15.6	-0.0286
15.61	-0.0383		15.58	0.0047		15.61	-0.0278
15.62	-0.0376		15.58	0.0036		15.61	-0.0271
15.63	-0.0371		15.58	-0.0334		15.62	-0.0265
15.64	-0.0367		15.59	-0.0359		15.63	-0.0261
15.65	-0.0363		15.6	-0.0333		15.64	-0.0257
15.66	-0.036		15.61	-0.0316		15.65	-0.0254
15.66	-0.0358		15.62	-0.0306		15.66	-0.0251
15.67	-0.0356		15.63	-0.0298		15.66	-0.0249
15.68	-0.0354		15.63	-0.0291		15.67	-0.0247
15.69	-0.0352		15.64	-0.0287		15.68	-0.0246
15.7	-0.0351		15.65	-0.0283		15.69	-0.0245
15.71	-0.0351		15.66	-0.028		15.7	-0.0244
15.71	-0.0349		15.67	-0.0277		15.71	-0.0243
15.72	-0.0349		15.68	-0.0276		15.71	-0.0242
15.73	-0.0348		15.68	-0.0273		15.72	-0.0242
15.74	-0.0348		15.69	-0.0273		15.73	-0.0242
15.75	-0.0348		15.7	-0.0272		15.74	-0.0241
15.76	-0.0347		15.71	-0.0269		15.75	-0.0241
15.76	-0.0347		15.72	-0.027		15.76	-0.0241
15.77	-0.0348		15.73	-0.0269		15.76	-0.0241
15.78	-0.0348		15.73	-0.0268		15.77	-0.0241
15.79	-0.0348		15.74	-0.0269		15.78	-0.0241
15.8	-0.0349		15.75	-0.027		15.79	-0.0241
15.81	-0.0348		15.76	-0.027		15.8	-0.0242
15.81	-0.0349		15.77	-0.0269		15.81	-0.0243
15.82	-0.035		15.78	-0.027		15.81	-0.0243
15.83	-0.035		15.78	-0.027		15.82	-0.0244
15.84	-0.0351		15.79	-0.0269		15.83	-0.0244
15.85	-0.0351		15.8	-0.027		15.84	-0.0245
15.86	-0.0352		15.81	-0.0272		15.85	-0.0246
15.86	-0.0353		15.82	-0.0272		15.86	-0.0246
15.87	-0.0354		15.83	-0.0272		15.86	-0.0247
15.88	-0.0355		15.83	-0.0274		15.87	-0.0248
15.89	-0.0357		15.84	-0.0275		15.88	-0.0249
15.9	-0.0357		15.85	-0.0275		15.89	-0.025
15.91	-0.0359		15.86	-0.0277		15.9	-0.0252
15.91	-0.0361		15.87	-0.0277		15.91	-0.0253
15.92	-0.0362		15.88	-0.0279		15.91	-0.0254
15.93	-0.0364		15.88	-0.028		15.92	-0.0255
15.94	-0.0366		15.89	-0.0281		15.93	-0.0256
15.95	-0.0368		15.9	-0.0283		15.94	-0.0257
15.96	-0.037		15.91	-0.0285		15.95	-0.0259
15.96	-0.0373		15.92	-0.0286		15.96	-0.026
15.97	-0.0376		15.93	-0.0288		15.96	-0.0262
15.98	-0.038		15.93	-0.029		15.97	-0.0264
15.99	-0.0385		15.94	-0.0292		15.98	-0.0266
16	-0.0389		15.95	-0.0294		15.99	-0.0268
16.01	-0.0396		15.96	-0.0297		16	-0.027
16.01	-0.0403		15.97	-0.03		16.01	-0.0272
16.02	-0.0411		15.98	-0.0305		16.01	-0.0275
16.03	-0.0421		15.98	-0.0309		16.02	-0.0278
16.04	-0.0433		15.99	-0.0311		16.03	-0.0281
16.05	-0.0447		16	-0.0315		16.04	-0.0286
16.06	-0.0465		16.01	-0.032		16.05	-0.029
16.06	-0.0486		16.02	-0.0327		16.06	-0.0296
16.07	-0.0509		16.03	-0.0333		16.06	-0.0304
16.08	-0.053		16.03	-0.034		16.07	-0.0312
16.08	-0.0247		16.04	-0.0347		16.08	-0.0322
16.09	-0.0046		16.05	-0.0357		16.08	-0.0112
16.1	-0.0033		16.06	-0.0365		16.09	-0.003
16.1	-0.0028		16.07	-0.0379		16.1	-0.0021
16.11	0.0397		16.08	-0.0391		16.1	0.0034
16.11	0.0391		16.08	-0.0404		16.11	0.0256
[truncated: 5,467 more rows]

## Sheet: Fig.2(b)
	ZSO			HESE
SO42--H2O	Proportion (%)		SO42--H2O-Cl--Br--I-	Proportion (%)
0-6	30.261		1-3-1-1-0	10.5891
1-5	62.364		1-3-1-0-1	11.3251
2-4	2.661		1-3-0-2-0	0.2515
3-3	1.973		1-3-2-0-0	0.3769
4-2	1.365		1-3-0-0-2	0.1547
5-1	1.015		2-3-0-1-0	1.9584
Others	0.361		2-3-1-0-0	1.7591
			2-3-0-0-1	1.2515
			0-5-1-0-0	4.5158
			0-5-0-0-1	3.5155
			0-5-0-1-0	4.4641
			1-4-0-1-0	20.3151
			1-4-1-0-0	24.0391
			1-4-0-0-1	10.1693
			0-6-0-0-0	3.3991
			1-5-0-0-0	1
			2-4-0-0-0	0.1362
			Others	0.7794

## Sheet: Fig.2(c)
	Zn foil			ZSO			HESE
Energy (eV)	Normalized intensity (a.u.)		Energy (eV)	Normalized intensity (a.u.)		Energy (eV)	Normalized intensity (a.u.)
9462.5	0.000259		9475.59	0.00654		9475.59	0.00604
9466.71	0.000229		9480.59	0.00772		9480.59	0.00761
9470.62	0.000216		9485.59	0.00714		9485.59	0.00704
9474.49	1.96e-54		9490.59	0.0065		9490.59	0.00639
9478.28	0.000181		9495.59	0.00588		9495.59	0.00579
9482.16	0.000157		9500.59	0.00526		9500.59	0.0052
9486.18	0.000147		9505.59	0.00462		9505.59	0.0046
9490.15	0.000135		9510.59	0.00399		9510.59	0.00399
9494.3	0.000115		9515.59	0.00336		9515.59	0.00342
9498.45	0.000102		9520.59	0.00277		9520.59	0.00284
9502.48	0.000920023		9525.59	0.00222		9525.59	0.00224
9506.51	0.000803841		9530.59	0.00169		9530.59	0.00166
9510.54	0.000727269		9535.59	0.00116		9535.59	0.00112
9514.45	0.000576606		9540.59	0.0006419		9540.59	0.000614245
9518.23	0.000534896		9545.59	0.000106599		9545.59	0.000108924
9522.14	0.000538142		9550.59	-0.000392881		9550.59	-0.00032178
9526.23	0.000519641		9555.59	-0.000883823		9555.59	-0.000709781
9530.06	0.000450217		9560.59	-0.00132		9560.59	-0.00116
9534.12	0.000299939		9565.59	-0.00172		9565.59	-0.00161
9538.44	0.000170458		9570.59	-0.00206		9570.59	-0.00198
9542.45	6.42206e-06		9575.59	-0.00236		9575.59	-0.00233
9546.26	-0.000164844		9580.59	-0.00264		9580.59	-0.00264
9550.19	-0.000348738		9585.59	-0.00289		9585.59	-0.00285
9554.09	-0.000541949		9590.59	-0.003		9590.59	-0.00298
9557.9	-0.000553288		9595.59	-0.00303		9595.59	-0.00305
9561.89	-0.000537416		9600.59	-0.00291		9600.59	-0.00303
9565.98	-0.000593975		9605.59	-0.00259		9605.59	-0.00285
9570.19	-0.000688532		9610.59	-0.00203		9610.59	-0.0024
9574.28	-0.000653672		9615.59	-0.00126		9615.59	-0.0017
9578.11	-0.000604405		9620.59	-0.000286088		9620.59	-0.000832544
9582.47	-0.000649041		9625.59	0.000542331		9625.59	2.41178e-05
9586.39	-0.000555369		9629	0.00151		9629	0.001
9590.32	-0.000463276		9630	0.00266		9630	0.00204
9594.2	-0.000475787		9631	0.00352		9631	0.0029
9598.05	-0.000421309		9632	0.00422		9632	0.00353
9601.94	-0.000381215		9633	0.00496		9633	0.00419
9605.79	-0.000304145		9634	0.00573		9634	0.00482
9610	-0.000123102		9635	0.00626		9635	0.0055
9614.08	9.5237e-05		9636	0.00675		9636	0.00587
9618.12	0.000367846		9636.2	0.00728		9636.2	0.00636
9622.21	0.000678006		9636.4	0.00757		9636.4	0.00661
9626.16	0.0012		9636.6	0.00797		9636.6	0.00689
9630.12	0.00189		9636.8	0.00819		9636.8	0.00699
9633.95	0.00483		9637	0.00854		9637	0.00731
9637.83	0.00696		9637.2	0.00864		9637.2	0.00756
9638.81	0.00965		9637.4	0.00892		9637.4	0.00791
9639.84	0.01113		9637.6	0.00891		9637.6	0.0081
9640.86	0.01159		9637.8	0.00905		9637.8	0.00832
9641.71	0.01287		9638	0.00931		9638	0.00843
9642.78	0.01452		9638.2	0.00962		9638.2	0.00852
9643.85	0.01754		9638.4	0.00975		9638.4	0.00875
9644.88	0.01836		9638.6	0.00998		9638.6	0.00881
9645.19	0.0186		9638.8	0.0104		9638.8	0.00909
9646.13	0.02144		9639	0.01066		9639	0.00925
9646.8	0.02218		9639.2	0.01075		9639.2	0.00927
9647.6	0.02626		9639.4	0.01102		9639.4	0.00944
9648.23	0.02729		9639.6	0.01135		9639.6	0.00967
9648.99	0.03058		9639.8	0.01151		9639.8	0.00977
9649.71	0.03408		9640	0.01157		9640	0.01018
9650.33	0.03556		9640.2	0.01206		9640.2	0.01061
9651	0.04309		9640.4	0.01251		9640.4	0.01076
9651.76	0.05108		9640.6	0.01281		9640.6	0.01126
9652.48	0.05853		9640.8	0.01319		9640.8	0.01159
9653.19	0.06622		9641	0.01357		9641	0.01182
9653.86	0.07391		9641.2	0.01384		9641.2	0.01223
9654.62	0.08243		9641.4	0.01403		9641.4	0.01257
9655.43	0.09214		9641.6	0.01428		9641.6	0.01267
9656.1	0.10297		9641.8	0.01451		9641.8	0.01299
9656.82	0.11709		9642	0.01485		9642	0.01322
9657.49	0.13613		9642.2	0.01515		9642.2	0.01338
9658.21	0.16521		9642.4	0.01547		9642.4	0.01345
9658.83	0.20427		9642.6	0.01596		9642.6	0.01394
9659.64	0.27888		9642.8	0.01649		9642.8	0.01424
9660.27	0.34971		9643	0.01679		9643	0.01442
9661.07	0.46923		9643.2	0.01727		9643.2	0.01482
9661.7	0.56411		9643.4	0.01773		9643.4	0.01535
9662.37	0.66222		9643.6	0.01791		9643.6	0.01582
9663.09	0.73879		9643.8	0.01828		9643.8	0.0163
9663.81	0.80156		9644	0.01871		9644	0.01693
9664.52	0.84834		9644.2	0.01901		9644.2	0.01726
9665.2	0.88407		9644.4	0.01944		9644.4	0.01766
9665.91	0.93367		9644.6	0.02007		9644.6	0.01798
9666.59	0.9816		9644.8	0.02041		9644.8	0.01831
9667.22	1.01919		9645	0.02096		9645	0.01895
9667.93	1.06249		9645.2	0.02149		9645.2	0.01959
9668.65	1.09853		9645.4	0.02204		9645.4	0.01999
9669.37	1.12619		9645.6	0.02251		9645.6	0.02038
9670	1.14398		9645.8	0.02319		9645.8	0.02069
9670.72	1.14839		9646	0.02373		9646	0.02094
9671.39	1.13603		9646.2	0.02424		9646.2	0.02136
9672.02	1.10991		9646.4	0.02496		9646.4	0.02205
9672.74	1.06814		9646.6	0.02566		9646.6	0.02264
9673.45	1.03339		9646.8	0.02617		9646.8	0.02344
9673.82	1.00866		9647	0.02664		9647	0.02405
9674.4	0.98456		9647.2	0.02724		9647.2	0.02472
9675.39	0.97048		9647.4	0.02771		9647.4	0.02531
9676.06	0.96238		9647.6	0.02832		9647.6	0.02598
9676.83	0.95664		9647.8	0.029		9647.8	0.02669
9677.45	0.95437		9648	0.02978		9648	0.02721
9677.86	0.95309		9648.2	0.03061		9648.2	0.02783
9678.85	0.94754		9648.4	0.03132		9648.4	0.02861
9679.48	0.94158		9648.6	0.03189		9648.6	0.02918
9680.2	0.93153		9648.8	0.03255		9648.8	0.02996
9680.87	0.92136		9649	0.03344		9649	0.03073
9681.59	0.90937		9649.2	0.03413		9649.2	0.03145
9682.31	0.89899		9649.4	0.03487		9649.4	0.03209
9682.63	0.89537		9649.6	0.03597		9649.6	0.03286
9683.62	0.88667		9649.8	0.03706		9649.8	0.03362
9684.38	0.88394		9650	0.03794		9650	0.03466
9685.06	0.88312		9650.2	0.03898		9650.2	0.03562
9685.83	0.88391		9650.4	0.04002		9650.4	0.03663
9686.5	0.88652		9650.6	0.04097		9650.6	0.03757
9687.22	0.89077		9650.8	0.04201		9650.8	0.0384
9687.94	0.89655		9651	0.04324		9651	0.03939
9688.57	0.90233		9651.2	0.04448		9651.2	0.04048
9689.39	0.91136		9651.4	0.04574		9651.4	0.04155
9690.06	0.91997		9651.6	0.04704		9651.6	0.04277
9690.74	0.93003		9651.8	0.04807		9651.8	0.04402
9691.41	0.93981		9652	0.0493		9652	0.04538
9692.14	0.94914		9652.2	0.05056		9652.2	0.04676
9692.9	0.96016		9652.4	0.05203		9652.4	0.04833
9693.62	0.97007		9652.6	0.05354		9652.6	0.04974
9694.3	0.97871		9652.8	0.05544		9652.8	0.05144
9695.02	0.98622		9653	0.05716		9653	0.0528
9695.79	0.99313		9653.2	0.05901		9653.2	0.05423
9696.51	0.99808		9653.4	0.06088		9653.4	0.05572
9697.24	1.00153		9653.6	0.06273		9653.6	0.05747
9697.6	1.00299		9653.8	0.06439		9653.8	0.0591
9698.63	1.00583		9654	0.06629		9654	0.06089
9699.27	1.00622		9654.2	0.06837		9654.2	0.06288
9699.94	1.0057		9654.4	0.07054		9654.4	0.06502
9700.76	1.00373		9654.6	0.07278		9654.6	0.06704
9701.53	1.00057		9654.8	0.07536		9654.8	0.06922
9702.16	0.99666		9655	0.07801		9655	0.07161
9702.84	0.99157		9655.2	0.08065		9655.2	0.07405
9703.56	0.98595		9655.4	0.08347		9655.4	0.0766
9704.33	0.98057		9655.6	0.08646		9655.6	0.07944
9705.01	0.97644		9655.8	0.08956		9655.8	0.08241
9705.68	0.973		9656	0.09273		9656	0.08549
9706.41	0.96946		9656.2	0.0962		9656.2	0.0887
9706.82	0.96774		9656.4	0.09973		9656.4	0.09191
9707.77	0.96476		9656.6	0.10357		9656.6	0.09548
9708.81	0.96305		9656.8	0.10769		9656.8	0.09912
9709.8	0.96317		9657	0.11207		9657	0.10293
9710.8	0.96511		9657.2	0.11659		9657.2	0.10709
9711.75	0.96848		9657.4	0.12153		9657.4	0.11167
9712.75	0.9725		9657.6	0.12684		9657.6	0.11647
9713.74	0.97656		9657.8	0.13231		9657.8	0.12166
9714.65	0.98		9658	0.13827		9658	0.12732
9715.6	0.98244		9658.2	0.14475		9658.2	0.13331
9716.42	0.98347		9658.4	0.15166		9658.4	0.13974
9717.55	0.98377		9658.6	0.15902		9658.6	0.14674
9718.55	0.98304		9658.8	0.16748		9658.8	0.15433
9719.5	0.98207		9659	0.17672		9659	0.16272
9720.5	0.98121		9659.2	0.18689		9659.2	0.17194
9721.54	0.98077		9659.4	0.1982		9659.4	0.18216
9722.54	0.98055		9659.6	0.21085		9659.6	0.19354
9723.49	0.98063		9659.8	0.22481		9659.8	0.20641
9724.45	0.98097		9660	0.24042		9660	0.22065
9725.4	0.98172		9660.2	0.25775		9660.2	0.23645
9726.58	0.98332		9660.4	0.27687		9660.4	0.25401
9727.54	0.98535		9660.6	0.29727		9660.6	0.27293
9728.44	0.98799		9660.8	0.31903		9660.8	0.29308
9729.63	0.99156		9661	0.34232		9661	0.31486
9730.63	0.99522		9661.2	0.36747		9661.2	0.33858
9731.54	0.99909		9661.4	0.39429		9661.4	0.36399
9732.58	1.0039		9661.6	0.42346		9661.6	0.3913
9733.67	1.00884		9661.8	0.45554		9661.8	0.42221
9734.67	1.01294		9662	0.49029		9662	0.45589
9735.72	1.01705		9662.2	0.52815		9662.2	0.49282
9736.72	1.01996		9662.4	0.5691		9662.4	0.53299
9737.82	1.02227		9662.6	0.61364		9662.6	0.57719
9738.77	1.02333		9662.8	0.66041		9662.8	0.62396
9739.82	1.02319		9663	0.70963		9663	0.67327
9740.78	1.02195		9663.2	0.75997		9663.2	0.7249
9741.83	1.01953		9663.4	0.81155		9663.4	0.77866
9742.83	1.01632		9663.6	0.86271		9663.6	0.83263
9743.88	1.01163		9663.8	0.91398		9663.8	0.88668
9744.88	1.00639		9664	0.96341		9664	0.94014
9745.84	1.00121		9664.2	1.01094		9664.2	0.99174
9746.93	0.9956		9664.4	1.05556		9664.4	1.04009
9747.84	0.99081		9664.6	1.09746		9664.6	1.08617
9748.8	0.98662		9664.8	1.13518		9664.8	1.12856
9749.85	0.98322		9665	1.16921		9665	1.16747
9750.67	0.98085		9665.2	1.1999		9665.2	1.20215
9751.73	0.9781		9665.4	1.22622		9665.4	1.23387
9752.73	0.97581		9665.6	1.24962		9665.6	1.26208
9753.64	0.97381		9665.8	1.2708		9665.8	1.28609
9754.74	0.9717		9666	1.28881		9666	1.30707
9755.56	0.97016		9666.2	1.30391		9666.2	1.32582
9756.61	0.968		9666.4	1.31749		9666.4	1.34126
9757.62	0.96621		9666.6	1.32919		9666.6	1.35393
9758.58	0.96479		9666.8	1.33852		9666.8	1.36433
9759.54	0.96345		9667	1.34677		9667	1.3734
9760.5	0.96253		9667.2	1.35419		9667.2	1.38132
9761.55	0.96209		9667.4	1.36093		9667.4	1.38888
9762.56	0.96248		9667.6	1.36523		9667.6	1.39577
9763.57	0.96372		9667.8	1.36894		9667.8	1.4036
9764.48	0.96538		9668	1.37245		9668	1.40773
9765.49	0.968		9668.2	1.37499		9668.2	1.41054
9766.59	0.97131		9668.4	1.37446		9668.4	1.41196
9767.55	0.97434		9668.6	1.37374		9668.6	1.41098
9768.56	0.9776		9668.8	1.37049		9668.8	1.40768
9769.57	0.98089		9669	1.36523		9669	1.40482
9770.58	0.98427		9669.2	1.35856		9669.2	1.39931
9771.63	0.98763		9669.4	1.35116		9669.4	1.38936
9772.6	0.99101		9669.6	1.34058		9669.6	1.38072
9773.6	0.99455		9669.8	1.32976		9669.8	1.36967
9774.66	0.99832		9670	1.31739		9670	1.35615
9775.76	1.00247		9670.2	1.30204		9670.2	1.34181
9776.73	1.00607		9670.4	1.28763		9670.4	1.32684
9777.78	1.01031		9670.6	1.27318		9670.6	1.30649
9778.79	1.0139		9670.8	1.25596		9670.8	1.28744
9779.85	1.01702		9671	1.23894		9671	1.26869
9780.77	1.01933		9671.2	1.22236		9671.2	1.24604
9781.87	1.02145		9671.4	1.20258		9671.4	1.22613
9782.93	1.02261		9671.6	1.18375		9671.6	1.20493
9783.89	1.02304		9671.8	1.16533		9671.8	1.18448
9784.86	1.02292		9672	1.14689		9672	1.16552
9785.92	1.02234		9672.2	1.1295		9672.2	1.14877
9786.97	1.02149		9672.4	1.1133		9672.4	1.13097
9787.99	1.02048		9672.6	1.09717		9672.6	1.11663
9788.91	1.01942		9672.8	1.08243		9672.8	1.09754
9789.83	1.01835		9673	1.06796		9673	1.07945
9790.84	1.01723		9673.2	1.05318		9673.2	1.06213
9791.9	1.01639		9673.4	1.04074		9673.4	1.04542
9792.82	1.01642		9673.6	1.02888		9673.6	1.03124
9793.79	1.01671		9673.8	1.01865		9673.8	1.02205
9794.8	1.01649		9674	1.00895		9674	1.01137
9795.77	1.01596		9674.2	1.00083		9674.2	1.00276
9796.74	1.01534		9674.4	0.99248		9674.4	0.99606
9797.61	1.01469		9674.6	0.98589		9674.6	0.98807
9798.54	1.01395		9674.8	0.98008		9674.8	0.9814
9799.46	1.01311		9675	0.97573		9675	0.97636
9800.57	1.0119		9675.2	0.97174		9675.2	0.97407
9801.49	1.01073		9675.4	0.96879		9675.4	0.96934
9802.5	1.00932		9675.6	0.96587		9675.6	0.9667
9803.57	1.00769		9675.8	0.9629		9675.8	0.96378
9804.53	1.00607		9676	0.96043		9676	0.96236
9805.55	1.00426		9676.2	0.9587		9676.2	0.95777
9806.48	1.00257		9676.4	0.95684		9676.4	0.95615
9807.58	1.00046		9676.6	0.9558		9676.6	0.95644
9809.62	0.99632		9676.8	0.95652		9676.8	0.95402
9811.6	0.99208		9677	0.95607		9677	0.95103
9813.59	0.9868		9677.2	0.95639		9677.2	0.95054
9815.63	0.98249		9677.4	0.9569		9677.4	0.95044
9817.67	0.97813		9677.6	0.95711		9677.6	0.95007
9819.75	0.97572		9677.8	0.95686		9677.8	0.95199
9821.84	0.97561		9678	0.95768		9678	0.95338
9823.83	0.97803		9678.2	0.95846		9678.2	0.95427
9825.82	0.98251		9678.4	0.95979		9678.4	0.95651
9827.86	0.9879		9678.6	0.96138		9678.6	0.95616
9829.81	0.99275		9678.8	0.96115		9678.8	0.95594
9831.86	0.99699		9679	0.96212		9679	0.95611
9833.85	1.00026		9679.2	0.96245		9679.2	0.95648
9835.62	1.00209		9679.4	0.96219		9679.4	0.95653
9837.71	1.00327		9679.6	0.96157		9679.6	0.95818
9839.57	1.00412		9679.8	0.96285		9679.8	0.95975
9841.53	1.00486		9680	0.96105		9680	0.96115
9843.48	1.00585		9680.2	0.96013		9680.2	0.96083
9845.48	1.00698		9680.4	0.95943		9680.4	0.95968
9847.44	1.0086		9680.6	0.95863		9680.6	0.95946
9849.44	1.00989		9680.8	0.95653		9680.8	0.9586
9851.54	1.01138		9681	0.95608		9681	0.95668
9853.59	1.01304		9681.2	0.95361		9681.2	0.95582
9855.6	1.01454		9681.4	0.95306		9681.4	0.95638
9857.61	1.01588		9681.6	0.9531		9681.6	0.95432
9859.57	1.01678		9681.8	0.95253		9681.8	0.95257
9861.72	1.01731		9682	0.95111		9682	0.95352
9863.77	1.01758		9682.2	0.95111		9682.2	0.95494
9865.69	1.01742		9682.4	0.94989		9682.4	0.95282
9867.7	1.01681		9682.6	0.94661		9682.6	0.95251
9869.71	1.01545		9682.8	0.94473		9682.8	0.95081
9871.77	1.01338		9683	0.94386		9683	0.94828
9873.74	1.01089		9683.2	0.94187		9683.2	0.94414
9875.75	1.0081		9683.4	0.94		9683.4	0.94354
9877.63	1.00481		9683.6	0.93817		9683.6	0.94008
9879.6	1.00191		9683.8	0.93601		9683.8	0.93864
9881.43	0.99866		9684	0.93399		9684	0.93534
9883.49	0.99549		9684.2	0.93233		9684.2	0.93405
9885.42	0.993		9684.4	0.92999		9684.4	0.93067
9887.39	0.99087		9684.6	0.92825		9684.6	0.92924
9889.36	0.98963		9684.8	0.9265		9684.8	0.92578
9891.34	0.98878		9685	0.92447		9685	0.92654
9893.45	0.98847		9685.2	0.92015		9685.2	0.92487
9895.43	0.98891		9685.4	0.91654		9685.4	0.92199
9897.5	0.98992		9685.6	0.91281		9685.6	0.91724
9899.57	0.99117		9685.8	0.91061		9685.8	0.9146
9901.5	0.9928		9686	0.90774		9686	0.90851
9903.72	0.99475		9686.2	0.90696		9686.2	0.90294
9905.75	0.99641		9686.4	0.90487		9686.4	0.90123
9907.54	0.99786		9686.6	0.90236		9686.6	0.90055
9909.71	0.9993		9686.8	0.89861		9686.8	0.89803
9911.79	1.00054		9687	0.8963		9687	0.89637
9913.82	1.00151		9687.2	0.89352		9687.2	0.89526
9915.75	1.0022		9687.4	0.8909		9687.4	0.89091
9917.74	1.00283		9687.6	0.8895		9687.6	0.88695
9919.68	1.00334		9687.8	0.88666		9687.8	0.88365
9921.57	1.00392		9688	0.88353		9688	0.88028
9923.46	1.00436		9688.2	0.88064		9688.2	0.87846
9925.4	1.00488		9688.4	0.87838		9688.4	0.87473
9927.34	1.00545		9688.6	0.87587		9688.6	0.87181
9929.38	1.00597		9688.8	0.87427		9688.8	0.86955
9931.37	1.00647		9689	0.87218		9689	0.86701
9933.41	1.00699		9689.2	0.87009		9689.2	0.86395
9935.45	1.00739		9689.4	0.86845		9689.4	0.86346
9937.49	1.00759		9689.6	0.86593		9689.6	0.86191
9939.63	1.0078		9689.8	0.86354		9689.8	0.86018
9941.48	1.00799		9690	0.86058		9690	0.85925
9943.48	1.00795		9690.2	0.85782		9690.2	0.85816
9945.66	1.00763		9690.4	0.85663		9690.4	0.8579
9947.75	1.00754		9690.6	0.85492		9690.6	0.85474
9949.7	1.00706		9690.8	0.85338		9690.8	0.85285
9951.75	1.00649		9691	0.85338		9691	0.85151
9953.8	1.00581		9691.2	0.85333		9691.2	0.85075
9955.85	1.00494		9691.4	0.85186		9691.4	0.84753
9957.75	1.00395		9691.6	0.85174		9691.6	0.84756
9960.66	1.00221		9691.8	0.85178		9691.8	0.84689
9963.57	1.00013		9692	0.85157		9692	0.84488
9966.39	0.99835		9692.7	0.85328		9692.7	0.84323
9969.4	0.99653		9693.4	0.85606		9693.4	0.84458
9972.36	0.99561		9694.1	0.86076		9694.1	0.84835
9975.32	0.99483		9694.8	0.86722		9694.8	0.85412
9978.39	0.99461		9695.5	0.87603		9695.5	0.86305
9981.55	0.99478		9696.2	0.88678		9696.2	0.87394
9984.42	0.99517		9696.9	0.89847		9696.9	0.88633
9987.68	0.99528		9697.6	0.91476		9697.6	0.90377
9990.7	0.99528		9698.3	0.93273		9698.3	0.92339
9993.73	0.9955		9699.99	0.9511		9699.99	0.94294
9996.8	0.99609		9701	0.96929		9701	0.96303
9999.83	0.99688		9702.02	0.98768		9702.02	0.98277
10002.9	0.9975		9703.05	1.0018		9703.05	0.99802
10005.7	0.99802		9704.09	1.01313		9704.09	1.01031
10008.6	0.99845		9705.15	1.02135		9705.15	1.01932
10011.5	0.99898		9706.21	1.02891		9706.21	1.02687
10014.5	0.99966		9707.29	1.03569		9707.29	1.03394
10017.4	1.00034		9708.38	1.04062		9708.38	1.03922
10020.5	1.00093		9709.49	1.0446		9709.49	1.04443
10023.6	1.0015		9710.6	1.04859		9710.6	1.04877
10026.5	1.00192		9711.73	1.05022		9711.73	1.05256
10029.7	1.00231		9712.87	1.04995		9712.87	1.05479
10032.8	1.00265		9714.02	1.04947		9714.02	1.05598
10035.8	1.00264		9715.19	1.0486		9715.19	1.05525
10038.9	1.00256		9716.36	1.04673		9716.36	1.05484
10041.9	1.00219		9717.55	1.04469		9717.55	1.05322
10044.8	1.0016		9718.75	1.0422		9718.75	1.04965
10047.7	1.00102		9719.97	1.03907		9719.97	1.04633
10050.8	1.00016		9721.19	1.03653		9721.19	1.04384
10053.5	0.99951		9722.43	1.03409		9722.43	1.04188
10056.5	0.99878		9723.68	1.03104		9723.68	1.03865
10059.5	0.99818		9724.94	1.02774		9724.94	1.03665
10062.3	0.99741		9726.21	1.02433		9726.21	1.03219
10065.4	0.99709		9727.5	1.01928		9727.5	1.02741
10068.6	0.99702		9728.8	1.01466		9728.8	1.02188
10071.7	0.99681		9730.11	1.01035		9730.11	1.01647
10074.7	0.99691		9731.43	1.00605		9731.43	1.01004
10077.8	0.99682		9732.77	1.0017		9732.77	1.00477
10080.7	0.99678		9734.11	0.99824		9734.11	0.99861
10083.9	0.99656		9735.47	0.99466		9735.47	0.99244
10086.8	0.99649		9736.85	0.99043		9736.85	0.98692
10089.8	0.9964		9738.23	0.98634		9738.23	0.98216
10092.9	0.9965		9739.63	0.98212		9739.63	0.97655
10095.7	0.9966		9741.03	0.97878		9741.03	0.97357
10098.6	0.99665		9742.45	0.97598		9742.45	0.97066
10101.4	0.99682		9743.89	0.97449		9743.89	0.96828
10104.4	0.99707		9745.33	0.97362		9745.33	0.96646
10107.6	0.99737		9746.79	0.97384		9746.79	0.96736
10110.5	0.99759		9748.26	0.97412		9748.26	0.96676
10113.6	0.99783		9749.74	0.97467		9749.74	0.96827
10116.7	0.99808		9751.23	0.97581		9751.23	0.97
10119.7	0.99847		9752.74	0.97765		9752.74	0.97206
10122.7	0.99879		9754.26	0.98012		9754.26	0.97479
10125.8	0.99911		9755.79	0.98253		9755.79	0.97804
10128.7	0.99931		9757.33	0.98465		9757.33	0.97972
10131.9	0.99953		9758.88	0.98603		9758.88	0.98261
10134.8	0.99975		9760.45	0.98748		9760.45	0.98587
10137.7	0.99986		9762.03	0.98956		9762.03	0.98918
10140.7	0.99994		9763.62	0.99033		9763.62	0.99216
10143.5	0.99986		9765.22	0.99333		9765.22	0.99573
10146.5	0.99974		9766.84	0.99636		9766.84	0.9991
10149.5	0.99965		9768.47	0.9995		9768.47	1.00178
10152.4	0.99953		9770.11	1.00141		9770.11	1.00266
10155.5	0.99917		9771.76	1.00476		9771.76	1.00429
10158.6	0.99896		9773.42	1.00432		9773.42	1.00545
10161.7	0.99875		9775.1	1.00248		9775.1	1.00414
10164.7	0.9986		9776.79	1.00317		9776.79	1.00569
10167.8	0.99841		9778.49	1.00455		9778.49	1.00858
10170.9	0.99849		9780.2	1.00598		9780.2	1.0112
10174	0.99843		9781.93	1.00933		9781.93	1.01348
10176.9	0.99833		9783.66	1.01404		9783.66	1.01738
10179.9	0.99846		9785.41	1.01551		9785.41	1.01838
10182.8	0.99845		9787.18	1.01487		9787.18	1.01625
10185.7	0.99852		9788.95	1.01164		9788.95	1.01158
10188.6	0.99849		9790.74	1.00867		9790.74	1.00825
10191.6	0.99849		9792.53	1.00834		9792.53	1.00725
10194.6	0.99853		9794.34	1.00794		9794.34	1.00497
10197.6	0.99865		9796.17	1.00841		9796.17	1.00536
10200.6	0.99864		9798	1.01116		9798	1.00669
10203.6	0.99871		9799.85	1.01268		9799.85	1.00774
10206.6	0.9987		9801.71	1.01162		9801.71	1.00728
10209.8	0.99875		9803.58	1.01073		9803.58	1.00761
10212.9	0.99885		9805.46	1.00925		9805.46	1.00759
10216	0.99898		9807.36	1.00764		9807.36	1.00702
10218.8	0.99913		9809.27	1.00616		9809.27	1.00559
10221.9	0.9993		9811.19	1.0049		9811.19	1.00324
10224.9	0.9995		9813.12	1.0034		9813.12	1.00087
10227.8	0.99976		9815.07	1.00311		9815.07	0.9992
10230.6	0.99996		9817.02	1.00252		9817.02	0.99857
10233.6	1.00008		9818.99	1.00119		9818.99	0.99782
10236.5	1.00016		9820.97	1.00003		9820.97	0.99705
10239.5	1.00039		9822.97	0.99978		9822.97	0.9982
10242.5	1.00055		9824.97	0.99871		9824.97	0.99865
10245.5	1.00075		9826.99	0.99767		9826.99	0.9999
10248.7	1.00076		9829.02	0.99788		9829.02	1.00055
10251.6	1.00101		9831.06	0.99641		9831.06	1.00048
10254.6	1.00119		9833.12	0.99434		9833.12	0.9995
10257.8	1.00141		9835.18	0.99356		9835.18	0.99874
10261.8	1.00158		9837.26	0.99358		9837.26	0.99875
10265.8	1.00158		9839.35	0.99392		9839.35	0.99915
10269.7	1.00166		9841.46	0.99493		9841.46	1.00036
10273.6	1.00179		9843.57	0.99516		9843.57	1.00145
10277.5	1.0018		9845.7	0.99578		9845.7	1.00302
10281.3	1.00189		9847.84	0.99599		9847.84	1.00241
10285.3	1.00201		9849.99	0.99568		9849.99	1.00331
10289.3	1.00216		9852.15	0.99685		9852.15	1.00466
10293.2	1.00217		9854.33	0.99868		9854.33	1.00585
10297.6	1.00226		9856.52	0.99961		9856.52	1.00584
10301.7	1.00232		9858.72	1.00027		9858.72	1.00773
10305.6	1.00237		9860.93	1.0016		9860.93	1.00723
10309.8	1.00246		9863.16	1.00239		9863.16	1.00561
10313.5	1.0025		9865.39	1.00322		9865.39	1.00425
10317.7	1.00277		9867.64	1.00423		9867.64	1.00337
10321.6	1.00285		9869.91	1.00521		9869.91	1.00184
10325.4	1.00296		9872.18	1.00563		9872.18	1.00123
10329.3	1.00304		9874.47	1.0061		9874.47	1.00141
10333.2	1.00311		9876.76	1.0057		9876.76	1.00087
10337.4	1.00331		9879.07	1.00574		9879.07	1.00137
10341.4	1.00352		9881.4	1.00604		9881.4	1.00109
10345.5	1.00377		9883.73	1.00667		9883.73	1.00064
10349.7	1.00408		9886.08	1.00722		9886.08	1.00072
10353.7	1.00426		9888.44	1.00821		9888.44	1.00039
10357.7	1.00457		9890.81	1.00772		9890.81	0.999
10361.7	1.00475		9893.19	1.00761		9893.19	0.99894
10365.6	1.00494		9895.59	1.00762		9895.59	0.99934
10369.1	1.00515		9898	1.00755		9898	0.99932
10373.3	1.0055		9900.42	1.00741		9900.42	0.9991
10377.3	1.00574		9902.85	1.00813		9902.85	0.99955
10381.4	1.00598		9905.29	1.00671		9905.29	1.00026
10385.4	1.00614		9907.75	1.00444		9907.75	1.00031
10389.5	1.0063		9910.22	1.00251		9910.22	0.99966
10393.6	1.00643		9912.7	1.0008		9912.7	1.00094
10397.6	1.00669		9915.19	0.99922		9915.19	1.00057
10401.7	1.00696		9917.7	0.99808		9917.7	0.99895
10405.7	1.00713		9920.22	0.99669		9920.22	0.99713
10409.7	1.00736		9922.75	0.9941		9922.75	0.99507
10413.5	1.00759		9925.29	0.99158		9925.29	0.99255
10417.4	1.00782		9927.84	0.98949		9927.84	0.99138
			9930.41	0.9898		9930.41	0.99181
			9932.99	0.99139		9932.99	0.9937
			9935.58	0.99378		9935.58	0.99654
			9938.18	0.99606		9938.18	0.99922
			9940.8	0.99725		9940.8	1.00134
			9943.42	0.99753		9943.42	1.00155
			9946.06	0.99647		9946.06	1.00048
			9948.72	0.99306		9948.72	0.99552
			9951.38	0.99105		9951.38	0.99208
			9954.06	0.99188		9954.06	0.99034
			9956.74	0.9934		9956.74	0.99008
			9959.45	0.99563		9959.45	0.99109
			9962.16	1.00028		9962.16	0.99553
			9964.88	1.0038		9964.88	0.99859
			9967.62	1.00446		9967.62	1.00049
			9970.37	1.00407		9970.37	1.00136
			9973.13	1.00317		9973.13	1.0014
			9975.9	0.99874		9975.9	0.99776
			9978.69	0.99757		9978.69	0.99683
			9981.49	0.99797		9981.49	0.99633
			9984.3	0.99861		9984.3	0.9967
			9987.12	0.99976		9987.12	0.99785
			9989.96	1.00443		9989.96	1.00247
			9992.8	1.0055		9992.8	1.00305
			9995.66	1.00485		9995.66	1.00346
			9998.53	1.00281		9998.53	1.00274
			10001.4	0.99882		10001.4	0.99861
			10004.3	0.99643		10004.3	0.99689
			10007.2	0.99606		10007.2	0.99811
			10010.1	0.99626		10010.1	0.99889
			10013.1	0.99774		10013.1	1.00025
			10016	1.00135		10016	1.00437
			10019	1.00305		10019	1.00648
			10021.9	1.00254		10021.9	1.00669
			10024.9	1.0009		10024.9	1.00523
			10027.9	0.99855		10027.9	1.00321
			10030.9	0.99613		10030.9	1.00085
			10033.9	0.99491		10033.9	0.9994
			10037	0.99495		10037	0.99878
			10040	0.99643		10040	1.00016
			10043.1	0.99834		10043.1	1.0006
			10046.1	1.00036		10046.1	1.00258
			10049.2	1.00133		10049.2	1.00252
			10052.3	1.00145		10052.3	1.00191
			10055.4	1.00153		10055.4	1.00049
			10058.5	1.0018		10058.5	1.00035
			10061.6	1.00214		10061.6	0.99907
			10064.8	1.00245		10064.8	0.99956
			10067.9	1.0025		10067.9	0.99971
			10071.1	1.00254		10071.1	0.99941
			10074.3	1.00241		10074.3	0.99937
			10077.5	1.002		10077.5	0.99975
			10080.7	1.00215		10080.7	0.99869
			10083.9	1.00209		10083.9	0.99831
			10087.1	1.00194		10087.1	0.9987
			10090.3	1.00167		10090.3	0.99884
			10093.6	1.00119		10093.6	0.99915
			10096.9	1.00043		10096.9	0.99969
			10100.1	0.99981		10100.1	0.99973
			10103.4	0.99924		10103.4	0.99964
			10106.7	0.99877		10106.7	0.99958
			10110	0.99868		10110	0.99981
			10113.3	0.99874		10113.3	0.99976
			10116.7	0.99928		10116.7	1.00028
			10120	0.99953		10120	1.0011
			10123.4	1.00015		10123.4	1.00176
			10126.8	1.00066		10126.8	1.00179
			10130.1	1.0007		10130.1	1.0029
			10133.5	1.00075		10133.5	1.00317
			10136.9	1.00077		10136.9	1.00223
			10140.4	1.00064		10140.4	1.0013
			10143.8	1.00077		10143.8	1.00042
			10147.2	1.00103		10147.2	0.99943
			10150.7	1.00084		10150.7	0.9986
			10154.2	1.00079		10154.2	0.99879
			10157.6	1.00102		10157.6	0.99895
			10161.1	1.00121		10161.1	0.99969
			10164.6	1.0012		10164.6	1.0001
			10168.2	1.00153		10168.2	1.00058
			10171.7	1.00175		10171.7	1.00094
			10175.2	1.00196		10175.2	1.00095
			10178.8	1.00212		10178.8	1.0007
			10182.3	1.00258		10182.3	1.00026
			10185.9	1.00242		10185.9	1.0002
			10189.5	1.00178		10189.5	1.00049
			10193.1	1.00082		10193.1	1.00161
			10196.7	0.99992		10196.7	1.00164
			10200.4	0.99927		10200.4	1.00239
			10204	0.99885		10204	1.00249
			10207.7	0.99902		10207.7	1.00259
			10211.3	0.99899		10211.3	1.00246
			10215	0.99855		10215	1.00286
			10218.7	0.99808		10218.7	1.00326
			10222.4	0.99788		10222.4	1.00378
			10226.1	0.99766		10226.1	1.00329
			10229.8	0.99805		10229.8	1.00288
			10233.6	0.99879		10233.6	1.00279
			10237.3	0.99889		10237.3	1.0014
			10241.1	0.99905		10241.1	0.99956
			10244.8	0.99943		10244.8	0.99886
			10248.6	0.99926		10248.6	0.99858
			10252.4	0.99906		10252.4	0.99825
			10256.2	0.99903		10256.2	0.9981
			10260.1	0.99928		10260.1	0.9989
			10263.9	0.99921		10263.9	0.99915
			10267.7	0.99968		10267.7	0.99878
			10271.6	0.99992		10271.6	0.99831
			10275.5	1.00033		10275.5	0.99843
			10279.3	1.00007		10279.3	0.99789
			10283.2	0.99918		10283.2	0.99783
			10287.2	0.99866		10287.2	0.99829
			10291.1	0.99874		10291.1	0.99921
			10295	0.99854		10295	0.99975
			10298.9	0.9985		10298.9	1.00078
			10302.9	0.99915		10302.9	1.00139
			10306.9	0.99916		10306.9	1.00153
			10310.9	0.99904		10310.9	1.00123
			10314.8	0.99933		10314.8	1.00136
			10318.9	0.99968		10318.9	1.00119
			10322.9	1.00009		10322.9	1.00132
			10326.9	1.00042		10326.9	1.00092
			10330.9	1.00033		10330.9	1.0004
			10335	1.00036		10335	0.99984
			10339.1	1.00039		10339.1	0.99977
			10343.1	1.00048		10343.1	0.9994
			10347.2	1.00058		10347.2	0.99967
			10351.3	1.00091		10351.3	0.99998
			10355.4	1.00075		10355.4	1.00037
			10359.6	1.00101		10359.6	0.99975
			10363.7	1.00094		10363.7	0.99961
			10367.9	1.0009		10367.9	0.99955
			10372	1.00069		10372	0.99947
			10376.2	1.00052		10376.2	0.99911
			10380.4	1.00018		10380.4	0.99954
			10384.6	0.99983		10384.6	0.99928
			10388.8	0.99954		10388.8	0.999
			10393	0.99958		10393	0.99905
			10397.3	0.99979		10397.3	0.99909
			10401.5	0.99974		10401.5	0.99908
			10405.8	1.00011		10405.8	0.99918
			10410	1.00047		10410	0.99917
			10414.3	1.00037		10414.3	0.99864
			10418.6	1.00035		10418.6	0.9982
			10422.9	1.00049		10422.9	0.99774
			10427.3	1.00052		10427.3	0.9978
			10431.6	1.00055		10431.6	0.99774
			10435.9	1.00068		10435.9	0.99799
			10440.3	1.00081		10440.3	0.99843
			10444.7	1.00071		10444.7	0.99846
			10449.1	1.00049		10449.1	0.99831
			10453.5	1.00012		10453.5	0.99844
			10457.9	1.00024		10457.9	0.99879
			10462.3	1.00007		10462.3	0.99953
			10466.7	0.99971		10466.7	1.00051
			10471.2	0.99961		10471.2	1.00107
			10475.6	0.99953		10475.6	1.00188
			10480.1	0.99921		10480.1	1.00236
			10484.6	0.9992		10484.6	1.00227
			10489.1	0.99954		10489.1	1.0017
			10493.6	0.99952		10493.6	1.00156
			10498.1	0.99978		10498.1	1.00118
			10502.6	1.00029		10502.6	1.00106
			10507.1	1.00041		10507.1	1.00072
			10511.7	1.00044		10511.7	1.00061
			10516.3	1.00058		10516.3	1.00009
			10520.8	1.00043		10520.8	0.99974
			10525.4	1.0001		10525.4	0.99937
			10530	0.99969		10530	0.99876
			10534.6	0.99913		10534.6	0.99831
			10539.3	0.99914		10539.3	0.99862
			10543.9	0.99957		10543.9	0.99794
			10548.6	1.0001		10548.6	0.9971
			10553.2	1.00105		10553.2	0.99738
			10557.9	1.00244		10557.9	0.99776
			10562.6	1.00316		10562.6	0.99782
			10567.3	1.00362		10567.3	0.99849
			10572	1.00371		10572	0.99959
			10576.7	1.0037		10576.7	1.00024
			10581.5	1.00335		10581.5	1.0007
			10586.2	1.00317		10586.2	1.00099
			10591	1.00296		10591	1.00122
			10595.8	1.00287		10595.8	1.00116
			10600.5	1.00284		10600.5	1.00063
			10605.3	0.99844		10605.3	0.9954

## Sheet: Fig.2(d)
		ZSO				HESE
X	Y	Z		X	Y	Z
-15.75	0	0.00658		-15.65	0	0.000980094
-15.75	0.01905	0.01272		-15.65	0.01917	0.00201
-15.75	0.0381	0.01745		-15.65	0.03834	0.00319
-15.75	0.05714	0.02034		-15.65	0.05751	0.00446
-15.75	0.07619	0.02194		-15.65	0.07668	0.00575
-15.75	0.09524	0.02257		-15.65	0.09585	0.00694
-15.75	0.11429	0.0225		-15.65	0.11502	0.00791
-15.75	0.13333	0.02206		-15.65	0.13419	0.00855
-15.75	0.15238	0.02159		-15.65	0.15336	0.00877
-15.75	0.17143	0.02141		-15.65	0.17252	0.00855
-15.75	0.19048	0.02172		-15.65	0.19169	0.00788
-15.75	0.20952	0.02257		-15.65	0.21086	0.00682
-15.75	0.22857	0.02379		-15.65	0.23003	0.00546
-15.75	0.24762	0.02516		-15.65	0.2492	0.00393
-15.75	0.26667	0.02643		-15.65	0.26837	0.00237
-15.75	0.28571	0.02743		-15.65	0.28754	0.000972337
-15.75	0.30476	0.02803		-15.65	0.30671	0.000613275
-15.75	0.32381	0.02817		-15.65	0.32588	0.00138
-15.75	0.34286	0.02785		-15.65	0.34505	0.00187
-15.75	0.36191	0.02712		-15.65	0.36422	0.00196
-15.75	0.38095	0.02604		-15.65	0.38339	0.00165
-15.75	0.4	0.0247		-15.65	0.40256	0.00103
-15.75	0.41905	0.0232		-15.65	0.42173	0.000570985
-15.75	0.4381	0.02163		-15.65	0.4409	0.00138
-15.75	0.45714	0.02006		-15.65	0.46006	0.00256
-15.75	0.47619	0.01855		-15.65	0.47923	0.00378
-15.75	0.49524	0.01713		-15.65	0.4984	0.00493
-15.75	0.51429	0.01582		-15.65	0.51757	0.00592
-15.75	0.53333	0.01461		-15.65	0.53674	0.00672
-15.75	0.55238	0.01349		-15.65	0.55591	0.0073
-15.75	0.57143	0.01245		-15.65	0.57508	0.00766
-15.75	0.59048	0.01146		-15.65	0.59425	0.00781
-15.75	0.60952	0.01053		-15.65	0.61342	0.00777
-15.75	0.62857	0.00964		-15.65	0.63259	0.00758
-15.75	0.64762	0.0088		-15.65	0.65176	0.00726
-15.75	0.66667	0.00799		-15.65	0.67093	0.00684
-15.75	0.68571	0.00724		-15.65	0.6901	0.00637
-15.75	0.70476	0.00653		-15.65	0.70927	0.00585
-15.75	0.72381	0.00587		-15.65	0.72844	0.00531
-15.75	0.74286	0.00525		-15.65	0.7476	0.00478
-15.75	0.76191	0.00469		-15.65	0.76677	0.00425
-15.75	0.78095	0.00417		-15.65	0.78594	0.00375
-15.75	0.8	0.00369		-15.65	0.80511	0.00328
-15.75	0.81905	0.00325		-15.65	0.82428	0.00284
-15.75	0.8381	0.00285		-15.65	0.84345	0.00245
-15.75	0.85714	0.00248		-15.65	0.86262	0.00209
-15.75	0.87619	0.00215		-15.65	0.88179	0.00176
-15.75	0.89524	0.00185		-15.65	0.90096	0.00148
-15.75	0.91429	0.00158		-15.65	0.92013	0.00123
-15.75	0.93333	0.00134		-15.65	0.9393	0.00102
-15.75	0.95238	0.00112		-15.65	0.95847	0.000837496
-15.75	0.97143	0.000935693		-15.65	0.97764	0.000682451
-15.75	0.99048	0.000773532		-15.65	0.99681	0.000552162
-15.75	1.00952	0.000634159		-15.65	1.01597	0.000443613
-15.75	1.02857	0.000515561		-15.65	1.03514	0.000353927
-15.75	1.04762	0.000415652		-15.65	1.05431	0.000280427
-15.75	1.06667	0.000332329		-15.65	1.07348	0.000220669
-15.75	1.08571	0.000263526		-15.65	1.09265	0.000172462
-15.75	1.10476	0.000207271		-15.65	1.11182	0.000133875
-15.75	1.12381	0.000161717		-15.65	1.13099	0.000103223
-15.75	1.14286	0.00012518		-15.65	1.15016	7.9058e-05
-15.75	1.16191	9.61453e-05		-15.65	1.16933	6.0151e-05
-15.75	1.18095	7.32822e-05		-15.65	1.1885	4.54676e-05
-15.75	1.2	5.54383e-05		-15.65	1.20767	3.41483e-05
-15.75	1.21905	4.16324e-05		-15.65	1.22684	2.54856e-05
-15.75	1.2381	3.10406e-05		-15.65	1.24601	1.89035e-05
-15.75	1.25714	2.29816e-05		-15.65	1.26518	1.39372e-05
-15.75	1.27619	1.68989e-05		-15.65	1.28435	1.02159e-05
-15.75	1.29524	1.23435e-05		-15.65	1.30351	7.4461e-06
-15.75	1.31429	8.95788e-06		-15.65	1.32268	5.39791e-06
-15.75	1.33333	6.46016e-06		-15.65	1.34185	3.89284e-06
-15.75	1.35238	4.63065e-06		-15.65	1.36102	2.79359e-06
-15.75	1.37143	3.29987e-06		-15.65	1.38019	1.99538e-06
-15.75	1.39048	2.33835e-06		-15.65	1.39936	1.419e-06
-15.75	1.40952	1.64813e-06		-15.65	1.41853	1.00497e-06
-15.75	1.42857	1.15573e-06		-15.65	1.4377	7.0905e-07
-15.75	1.44762	8.06548e-07		-15.65	1.45687	4.9852e-07
-15.75	1.46667	5.60339e-07		-15.65	1.47604	3.49385e-07
-15.75	1.48571	3.8767e-07		-15.65	1.49521	2.44161e-07
-15.75	1.50476	2.67188e-07		-15.65	1.51438	1.70185e-07
-15.75	1.52381	1.83518e-07		-15.65	1.53355	1.18347e-07
-15.75	1.54286	1.25664e-07		-15.65	1.55272	8.21274e-08
-15.75	1.56191	8.58199e-08		-15.65	1.57189	5.68854e-08
-15.75	1.58095	5.84752e-08		-15.65	1.59105	3.93335e-08
-15.75	1.6	3.97668e-08		-15.65	1.61022	2.71532e-08
-15.75	1.61905	2.7001e-08		-15.65	1.62939	1.87153e-08
-15.75	1.6381	1.83092e-08		-15.65	1.64856	1.28792e-08
-15.75	1.65714	1.24019e-08		-15.65	1.66773	8.84867e-09
-15.75	1.67619	8.39254e-09		-15.65	1.6869	6.06904e-09
-15.75	1.69524	5.67437e-09		-15.65	1.70607	4.15488e-09
-15.75	1.71429	3.83311e-09		-15.65	1.72524	2.8387e-09
-15.75	1.73333	2.58675e-09		-15.65	1.74441	1.9352e-09
-15.75	1.75238	1.74364e-09		-15.65	1.76358	1.31611e-09
-15.75	1.77143	1.17371e-09		-15.65	1.78275	8.9275e-10
-15.75	1.79048	7.88784e-10		-15.65	1.80192	6.03886e-10
-15.75	1.80952	5.29083e-10		-15.65	1.82109	4.07273e-10
-15.75	1.82857	3.54105e-10		-15.65	1.84026	2.73807e-10
-15.75	1.84762	2.36405e-10		-15.65	1.85943	1.83469e-10
-15.75	1.86667	1.5739e-10		-15.65	1.87859	1.22512e-10
-15.75	1.88571	1.04469e-10		-15.65	1.89776	8.15141e-11
-15.75	1.90476	6.91165e-11		-15.65	1.91693	5.40357e-11
-15.75	1.92381	4.55696e-11		-15.65	1.9361	3.56847e-11
-15.75	1.94286	2.99358e-11		-15.65	1.95527	2.34748e-11
-15.75	1.96191	1.95915e-11		-15.65	1.97444	1.5382e-11
-15.75	1.98095	1.27718e-11		-15.65	1.99361	1.00391e-11
-15.75	2	8.29281e-12		-15.65	2.01278	6.52569e-12
-15.75	2.01905	5.36275e-12		-15.65	2.03195	4.22474e-12
-15.75	2.0381	3.45372e-12		-15.65	2.05112	2.724e-12
-15.75	2.05714	2.21505e-12		-15.65	2.07029	1.74921e-12
-15.75	2.07619	1.41473e-12		-15.65	2.08946	1.11867e-12
-15.75	2.09524	8.99811e-13		-15.65	2.10863	7.12517e-13
-15.75	2.11429	5.69933e-13		-15.65	2.1278	4.5198e-13
-15.75	2.13333	3.59501e-13		-15.65	2.14697	2.85551e-13
-15.75	2.15238	2.25835e-13		-15.65	2.16613	1.79678e-13
-15.75	2.17143	1.41292e-13		-15.65	2.1853	1.12606e-13
-15.75	2.19048	8.80434e-14		-15.65	2.20447	7.02906e-14
-15.75	2.20952	5.46454e-14		-15.65	2.22364	4.37031e-14
-15.75	2.22857	3.37841e-14		-15.65	2.24281	2.70658e-14
-15.75	2.24762	2.08066e-14		-15.65	2.26198	1.66969e-14
-15.75	2.26667	1.27658e-14		-15.65	2.28115	1.02606e-14
-15.75	2.28571	7.80347e-15		-15.65	2.30032	6.28125e-15
-15.75	2.30476	4.75278e-15		-15.65	2.31949	3.83065e-15
-15.75	2.32381	2.88445e-15		-15.65	2.33866	2.32738e-15
-15.75	2.34286	1.74447e-15		-15.65	2.35783	1.40879e-15
-15.75	2.36191	1.05144e-15		-15.65	2.377	8.49631e-16
-15.75	2.38095	6.3162e-16		-15.65	2.39617	5.10543e-16
-15.75	2.4	3.7819e-16		-15.65	2.41534	3.05682e-16
-15.75	2.41905	2.25723e-16		-15.65	2.43451	1.82373e-16
-15.75	2.4381	1.34302e-16		-15.65	2.45367	1.08423e-16
-15.75	2.45714	7.96626e-17		-15.65	2.47284	6.42344e-17
-15.75	2.47619	4.71103e-17		-15.65	2.49201	3.79243e-17
-15.75	2.49524	2.77772e-17		-15.65	2.51118	2.23145e-17
-15.75	2.51429	1.63301e-17		-15.65	2.53035	1.30856e-17
-15.75	2.53333	9.57261e-18		-15.65	2.54952	7.64799e-18
-15.75	2.55238	5.59534e-18		-15.65	2.56869	4.45521e-18
-15.75	2.57143	3.26125e-18		-15.65	2.58786	2.58684e-18
-15.75	2.59048	1.89543e-18		-15.65	2.60703	1.49715e-18
-15.75	2.60952	1.09849e-18		-15.65	2.6262	8.63708e-19
-15.75	2.62857	6.34823e-19		-15.65	2.64537	4.96693e-19
-15.75	2.64762	3.6582e-19		-15.65	2.66454	2.84734e-19
-15.75	2.66667	2.10201e-19		-15.65	2.68371	1.62717e-19
-15.75	2.68571	1.20433e-19		-15.65	2.70288	9.26997e-20
-15.75	2.70476	6.87997e-20		-15.65	2.72205	5.26481e-20
-15.75	2.72381	3.91872e-20		-15.65	2.74121	2.98096e-20
-15.75	2.74286	2.22538e-20		-15.65	2.76038	1.68269e-20
-15.75	2.76191	1.25994e-20		-15.65	2.77955	9.46962e-21
-15.75	2.78095	7.11156e-21		-15.65	2.79872	5.31309e-21
-15.75	2.8	4.00159e-21		-15.65	2.81789	2.97202e-21
-15.75	2.81905	2.24459e-21		-15.65	2.83706	1.65748e-21
-15.75	2.8381	1.25505e-21		-15.65	2.85623	9.21597e-22
-15.75	2.85714	6.99497e-22		-15.65	2.8754	5.10892e-22
-15.75	2.87619	3.88596e-22		-15.65	2.89457	2.82367e-22
-15.75	2.89524	2.15171e-22		-15.65	2.91374	1.55595e-22
-15.75	2.91429	1.18749e-22		-15.65	2.93291	8.54812e-23
-15.75	2.93333	6.53157e-23		-15.65	2.95208	4.68208e-23
-15.75	2.95238	3.58047e-23		-15.65	2.97125	2.5568e-23
-15.75	2.97143	1.95607e-23		-15.65	2.99042	1.39201e-23
-15.75	2.99048	1.06498e-23		-15.65	3.00959	7.55563e-24
-15.75	3.00952	5.77833e-24		-15.65	3.02875	4.08863e-24
-15.75	3.02857	3.12434e-24		-15.65	3.04792	2.20577e-24
-15.75	3.04762	1.68346e-24		-15.65	3.06709	1.18635e-24
-15.75	3.06667	9.03917e-25		-15.65	3.08626	6.36103e-25
-15.75	3.08571	4.83651e-25		-15.65	3.10543	3.40019e-25
-15.75	3.10476	2.57875e-25		-15.65	3.1246	1.81189e-25
-15.75	3.12381	1.37011e-25		-15.65	3.14377	9.62515e-26
-15.75	3.14286	7.2539e-26		-15.65	3.16294	5.09713e-26
-15.75	3.16191	3.82694e-26		-15.65	3.18211	2.6908e-26
-15.75	3.18095	2.01185e-26		-15.65	3.20128	1.41601e-26
-15.75	3.2	1.05391e-26		-15.65	3.22045	7.42808e-27
-15.75	3.21905	5.50142e-27		-15.65	3.23962	3.88424e-27
-15.75	3.2381	2.86161e-27		-15.65	3.25879	2.02465e-27
-15.75	3.25714	1.48324e-27		-15.65	3.27796	1.05196e-27
-15.75	3.27619	7.66084e-28		-15.65	3.29713	5.44823e-28
-15.75	3.29524	3.94285e-28		-15.65	3.31629	2.8126e-28
-15.75	3.31429	2.02215e-28		-15.65	3.33546	1.44728e-28
-15.75	3.33333	1.03345e-28		-15.65	3.35463	7.42312e-29
-15.75	3.35238	5.26306e-29		-15.65	3.3738	3.79493e-29
-15.75	3.37143	2.67094e-29		-15.65	3.39297	1.93374e-29
-15.75	3.39048	1.35074e-29		-15.65	3.41214	9.8213e-30
-15.75	3.40952	6.80707e-30		-15.65	3.43131	4.97175e-30
-15.75	3.42857	3.4185e-30		-15.65	3.45048	2.50851e-30
-15.75	3.44762	1.7108e-30		-15.65	3.46965	1.2615e-30
-15.75	3.46667	8.53212e-31		-15.65	3.48882	6.32287e-31
-15.75	3.48571	4.24043e-31		-15.65	3.50799	3.15863e-31
-15.75	3.50476	2.10021e-31		-15.65	3.52716	1.57266e-31
-15.75	3.52381	1.03661e-31		-15.65	3.54633	7.80403e-32
-15.75	3.54286	5.09892e-32		-15.65	3.5655	3.85967e-32
-15.75	3.56191	2.49947e-32		-15.65	3.58467	1.90249e-32
-15.75	3.58095	1.22105e-32		-15.65	3.60383	9.34624e-33
-15.75	3.6	5.94472e-33		-15.65	3.623	4.57602e-33
-15.75	3.61905	2.88437e-33		-15.65	3.64217	2.23292e-33
-15.75	3.6381	1.39474e-33		-15.65	3.66134	1.08591e-33
-15.75	3.65714	6.72139e-34		-15.65	3.68051	5.26309e-34
-15.75	3.67619	3.22816e-34		-15.65	3.69968	2.54224e-34
-15.75	3.69524	1.54519e-34		-15.65	3.71885	1.22382e-34
-15.75	3.71429	7.37132e-35		-15.65	3.73802	5.87142e-35
-15.75	3.73333	3.50465e-35		-15.65	3.75719	2.8073e-35
-15.75	3.75238	1.66067e-35		-15.65	3.77636	1.33769e-35
-15.75	3.77143	7.84269e-36		-15.65	3.79553	6.35241e-36
-15.75	3.79048	3.6914e-36		-15.65	3.8147	3.00634e-36
-15.75	3.80952	1.73167e-36		-15.65	3.83387	1.41792e-36
-15.75	3.82857	8.09629e-37		-15.65	3.85304	6.66464e-37
-15.75	3.84762	3.77275e-37		-15.65	3.8722	3.12186e-37
-15.75	3.86667	1.7522e-37		-15.65	3.89137	1.45733e-37
-15.75	3.88571	8.1108e-38		-15.65	3.91054	6.77971e-38
-15.75	3.90476	3.74196e-38		-15.65	3.92971	3.14319e-38
-15.75	3.92381	1.72065e-38		-15.65	3.94888	1.45223e-38
-15.75	3.94286	7.88575e-39		-15.65	3.96805	6.68654e-39
-15.75	3.96191	3.60208e-39		-15.65	3.98722	3.0681e-39
-15.75	3.98095	1.63993e-39		-15.65	4.00639	1.40294e-39
-15.75	4	7.44144e-40		-15.65	4.02556	6.39304e-40
-15.75	4.01905	3.36551e-40		-15.65	4.04473	2.90318e-40
-15.75	4.0381	1.51708e-40		-15.65	4.0639	1.31382e-40
-15.75	4.05714	6.81596e-41		-15.65	4.08307	5.9251e-41
-15.75	4.07619	3.05218e-41		-15.65	4.10224	2.66286e-41
-15.75	4.09524	1.36224e-41		-15.65	4.12141	1.1926e-41
-15.75	4.11429	6.05988e-42		-15.65	4.14058	5.3227e-42
-15.75	4.13333	2.6868e-42		-15.65	4.15974	2.36734e-42
-15.75	4.15238	1.18732e-42		-15.65	4.17891	1.04925e-42
-15.75	4.17143	5.22957e-43		-15.65	4.19808	4.63433e-43
-15.75	4.19048	2.29574e-43		-15.65	4.21725	2.03977e-43
-15.75	4.20952	1.00448e-43		-15.65	4.23642	8.94671e-44
-15.75	4.22857	4.38048e-44		-15.65	4.25559	3.91049e-44
-15.75	4.24762	1.90397e-44		-15.65	4.27476	1.70327e-44
-15.75	4.26667	8.24818e-45		-15.65	4.29393	7.39299e-45
-15.75	4.28571	3.56134e-45		-15.65	4.3131	3.19771e-45
-15.75	4.30476	1.53258e-45		-15.65	4.33227	1.37829e-45
-15.75	4.32381	6.5734e-46		-15.65	4.35144	5.92002e-46
-15.75	4.34286	2.81003e-46		-15.65	4.37061	2.53388e-46
-15.75	4.36191	1.19724e-46		-15.65	4.38978	1.08076e-46
-15.75	4.38095	5.08401e-47		-15.65	4.40895	4.59357e-47
-15.75	4.4	2.15169e-47		-15.65	4.42812	1.94558e-47
-15.75	4.41905	9.07614e-48		-15.65	4.44728	8.21157e-48
-15.75	4.4381	3.81566e-48		-15.65	4.46645	3.45366e-48
-15.75	4.45714	1.59876e-48		-15.65	4.48562	1.44746e-48
-15.75	4.47619	6.67633e-49		-15.65	4.50479	6.04521e-49
-15.75	4.49524	2.77866e-49		-15.65	4.52396	2.51588e-49
-15.75	4.51429	1.15258e-49		-15.65	4.54313	1.04338e-49
-15.75	4.53333	4.76483e-50		-15.65	4.5623	4.31188e-50
-15.75	4.55238	1.96317e-50		-15.65	4.58147	1.77568e-50
-15.75	4.57143	8.06129e-51		-15.65	4.60064	7.28673e-51
-15.75	4.59048	3.299e-51		-15.65	4.61981	2.9797e-51
-15.75	4.60952	1.34552e-51		-15.65	4.63898	1.21418e-51
-15.75	4.62857	5.46927e-52		-15.65	4.65815	4.93021e-52
-15.75	4.64762	2.21562e-52		-15.65	4.67732	1.99488e-52
-15.75	4.66667	8.94509e-53		-15.65	4.69649	8.04332e-53
-15.75	4.68571	3.59914e-53		-15.65	4.71566	3.23165e-53
-15.75	4.70476	1.44322e-53		-15.65	4.73482	1.29384e-53
-15.75	4.72381	5.76751e-54		-15.65	4.75399	5.16184e-54
-15.75	4.74286	2.297e-54		-15.65	4.77316	2.05208e-54
-15.75	4.76191	9.11698e-55		-15.65	4.79233	8.1293e-55
-15.75	4.78095	3.60624e-55		-15.65	4.8115	3.20906e-55
-15.75	4.8	1.42158e-55		-15.65	4.83067	1.26231e-55
-15.75	4.81905	5.58468e-56		-15.65	4.84984	4.94792e-56
-15.75	4.8381	2.18643e-56		-15.65	4.86901	1.93261e-56
-15.75	4.85714	8.53059e-57		-15.65	4.88818	7.52193e-57
-15.75	4.87619	3.31687e-57		-15.65	4.90735	2.91729e-57
-15.75	4.89524	1.28524e-57		-15.65	4.92652	1.12744e-57
-15.75	4.91429	4.96296e-58		-15.65	4.94569	4.34181e-58
-15.75	4.93333	1.90985e-58		-15.65	4.96486	1.66615e-58
-15.75	4.95238	7.32414e-59		-15.65	4.98403	6.37115e-59
-15.75	4.97143	2.79906e-59		-15.65	5.0032	2.42765e-59
-15.75	4.99048	1.06602e-59		-15.65	5.02236	9.21756e-60
-15.75	5.00952	4.04588e-60		-15.65	5.04153	3.48746e-60
-15.75	5.02857	1.53022e-60		-15.65	5.0607	1.31481e-60
-15.75	5.04762	5.76752e-61		-15.65	5.07987	4.93948e-61
-15.75	5.06667	2.16628e-61		-15.65	5.09904	1.8491e-61
-15.75	5.08571	8.10828e-62		-15.65	5.11821	6.89766e-62
-15.75	5.10476	3.02435e-62		-15.65	5.13738	2.56392e-62
-15.75	5.12381	1.12415e-62		-15.65	5.15655	9.49659e-63
-15.75	5.14286	4.16389e-63		-15.65	5.17572	3.50504e-63
-15.75	5.16191	1.53695e-63		-15.65	5.19489	1.28908e-63
-15.75	5.18095	5.65333e-64		-15.65	5.21406	4.72417e-64
-15.75	5.2	2.0722e-64		-15.65	5.23323	1.72517e-64
-15.75	5.21905	7.56903e-65		-15.65	5.2524	6.27771e-65
-15.75	5.2381	2.75505e-65		-15.65	5.27157	2.2763e-65
-15.75	5.25714	9.99304e-66		-15.65	5.29074	8.22468e-66
-15.75	5.27619	3.61197e-66		-15.65	5.3099	2.96121e-66
-15.75	5.29524	1.30097e-66		-15.65	5.32907	1.06238e-66
-15.75	5.31429	4.66948e-67		-15.65	5.34824	3.79794e-67
-15.75	5.33333	1.6701e-67		-15.65	5.36741	1.35294e-67
-15.75	5.35238	5.95242e-68		-15.65	5.38658	4.80252e-68
-15.75	5.37143	2.11406e-68		-15.65	5.40575	1.69871e-68
-15.75	5.39048	7.48194e-69		-15.65	5.42492	5.98728e-69
-15.75	5.40952	2.63866e-69		-15.65	5.44409	2.10281e-69
-15.75	5.42857	9.27306e-70		-15.65	5.46326	7.3592e-70
-15.75	5.44762	3.24738e-70		-15.65	5.48243	2.56638e-70
-15.75	5.46667	1.13322e-70		-15.65	5.5016	8.91807e-71
-15.75	5.48571	3.94061e-71		-15.65	5.52077	3.08803e-71
-15.75	5.50476	1.36547e-71		-15.65	5.53994	1.0655e-71
-15.75	5.52381	4.71484e-72		-15.65	5.55911	3.66338e-72
-15.75	5.54286	1.62225e-72		-15.65	5.57828	1.25508e-72
-15.75	5.56191	5.56209e-73		-15.65	5.59744	4.28471e-73
-15.75	5.58095	1.9003e-73		-15.65	5.61661	1.45758e-73
-15.75	5.6	6.46953e-74		-15.65	5.63578	4.94085e-74
-15.75	5.61905	2.19476e-74		-15.65	5.65495	1.66891e-74
-15.75	5.6381	7.41936e-75		-15.65	5.67412	5.61723e-75
-15.75	5.65714	2.49925e-75		-15.65	5.69329	1.88396e-75
-15.75	5.67619	8.38909e-76		-15.65	5.71246	6.29627e-76
-15.75	5.69524	2.80597e-76		-15.65	5.73163	2.09679e-76
-15.75	5.71429	9.35221e-77		-15.65	5.7508	6.95801e-77
-15.75	5.73333	3.10604e-77		-15.65	5.76997	2.30079e-77
-15.75	5.75238	1.02792e-77		-15.65	5.78914	7.58104e-78
-15.75	5.77143	3.38981e-78		-15.65	5.80831	2.48909e-78
-15.75	5.79048	1.11391e-78		-15.65	5.82748	8.14355e-79
-15.75	5.80952	3.64742e-79		-15.65	5.84665	2.65489e-79
-15.75	5.82857	1.19009e-79		-15.65	5.86582	8.62465e-80
-15.75	5.84762	3.86933e-80		-15.65	5.88498	2.79188e-80
-15.75	5.86667	1.25357e-80		-15.65	5.90415	9.00558e-81
-15.75	5.88571	4.04689e-81		-15.65	5.92332	2.8946e-81
-15.75	5.90476	1.30182e-81		-15.65	5.94249	9.27098e-82
-15.75	5.92381	4.17293e-82		-15.65	5.96166	2.95886e-82
-15.75	5.94286	1.33287e-82		-15.65	5.98083	9.40986e-83
-15.75	5.96191	4.2422e-83		-15.65	6	2.98197e-83
-15.75	5.98095	1.3454e-83		-15.6	0	0.000980095
-15.75	6	4.25178e-84		-15.6	0.01917	0.00201
-15.7	0	0.00658		-15.6	0.03834	0.0032
-15.7	0.01905	0.01272		-15.6	0.05751	0.00446
-15.7	0.0381	0.01745		-15.6	0.07668	0.00575
-15.7	0.05714	0.02034		-15.6	0.09585	0.00694
-15.7	0.07619	0.02195		-15.6	0.11502	0.00792
-15.7	0.09524	0.02258		-15.6	0.13419	0.00855
-15.7	0.11429	0.02251		-15.6	0.15336	0.00878
-15.7	0.13333	0.02207		-15.6	0.17252	0.00856
-15.7	0.15238	0.0216		-15.6	0.19169	0.00789
-15.7	0.17143	0.02142		-15.6	0.21086	0.00683
-15.7	0.19048	0.02175		-15.6	0.23003	0.00548
-15.7	0.20952	0.0226		-15.6	0.2492	0.00394
-15.7	0.22857	0.02383		-15.6	0.26837	0.00238
-15.7	0.24762	0.02521		-15.6	0.28754	0.00097438
-15.7	0.26667	0.02649		-15.6	0.30671	0.000610979
-15.7	0.28571	0.02751		-15.6	0.32588	0.00139
-15.7	0.30476	0.02812		-15.6	0.34505	0.00188
-15.7	0.32381	0.02827		-15.6	0.36422	0.00197
-15.7	0.34286	0.02796		-15.6	0.38339	0.00166
-15.7	0.36191	0.02724		-15.6	0.40256	0.00104
-15.7	0.38095	0.02617		-15.6	0.42173	0.000583116
-15.7	0.4	0.02484		-15.6	0.4409	0.00139
-15.7	0.41905	0.02334		-15.6	0.46006	0.00258
-15.7	0.4381	0.02177		-15.6	0.47923	0.00382
-15.7	0.45714	0.0202		-15.6	0.4984	0.00497
-15.7	0.47619	0.01869		-15.6	0.51757	0.00598
-15.7	0.49524	0.01727		-15.6	0.53674	0.00679
-15.7	0.51429	0.01596		-15.6	0.55591	0.00739
-15.7	0.53333	0.01474		-15.6	0.57508	0.00776
-15.7	0.55238	0.01362		-15.6	0.59425	0.00792
-15.7	0.57143	0.01258		-15.6	0.61342	0.00788
-15.7	0.59048	0.01159		-15.6	0.63259	0.00769
-15.7	0.60952	0.01066		-15.6	0.65176	0.00737
-15.7	0.62857	0.00977		-15.6	0.67093	0.00696
-15.7	0.64762	0.00892		-15.6	0.6901	0.00648
-15.7	0.66667	0.00811		-15.6	0.70927	0.00596
-15.7	0.68571	0.00735		-15.6	0.72844	0.00542
-15.7	0.70476	0.00663		-15.6	0.7476	0.00487
-15.7	0.72381	0.00597		-15.6	0.76677	0.00434
-15.7	0.74286	0.00535		-15.6	0.78594	0.00384
-15.7	0.76191	0.00478		-15.6	0.80511	0.00336
-15.7	0.78095	0.00425		-15.6	0.82428	0.00292
-15.7	0.8	0.00377		-15.6	0.84345	0.00251
-15.7	0.81905	0.00332		-15.6	0.86262	0.00214
-15.7	0.8381	0.00292		-15.6	0.88179	0.00182
-15.7	0.85714	0.00254		-15.6	0.90096	0.00153
-15.7	0.87619	0.00221		-15.6	0.92013	0.00127
-15.7	0.89524	0.0019		-15.6	0.9393	0.00105
-15.7	0.91429	0.00162		-15.6	0.95847	0.000865764
-15.7	0.93333	0.00138		-15.6	0.97764	0.000706415
-15.7	0.95238	0.00116		-15.6	0.99681	0.000572317
-15.7	0.97143	0.000967035		-15.6	1.01597	0.000460434
-15.7	0.99048	0.00080058		-15.6	1.03514	0.000367859
-15.7	1.00952	0.000657281		-15.6	1.05431	0.000291879
-15.7	1.02857	0.000535143		-15.6	1.07348	0.000230012
-15.7	1.04762	0.000432081		-15.6	1.09265	0.000180028
-15.7	1.06667	0.000345985		-15.6	1.11182	0.000139956
-15.7	1.08571	0.000274773		-15.6	1.13099	0.000108074
-15.7	1.10476	0.000216451		-15.6	1.15016	8.29007e-05
-15.7	1.12381	0.000169144		-15.6	1.16933	6.31725e-05
-15.7	1.14286	0.000131135		-15.6	1.1885	4.78265e-05
-15.7	1.16191	0.00010088		-15.6	1.20767	3.59769e-05
-15.7	1.18095	7.70151e-05		-15.6	1.22684	2.68933e-05
-15.7	1.2	5.83572e-05		-15.6	1.24601	1.99798e-05
-15.7	1.21905	4.38963e-05		-15.6	1.26518	1.47547e-05
-15.7	1.2381	3.27829e-05		-15.6	1.28435	1.08329e-05
-15.7	1.25714	2.43121e-05		-15.6	1.30351	7.90879e-06
-15.7	1.27619	1.79073e-05		-15.6	1.32268	5.74282e-06
-15.7	1.29524	1.31023e-05		-15.6	1.34185	4.14848e-06
-15.7	1.31429	9.52476e-06		-15.6	1.36102	2.98201e-06
-15.7	1.33333	6.88076e-06		-15.6	1.38019	2.13354e-06
-15.7	1.35238	4.94063e-06		-15.6	1.39936	1.51979e-06
-15.7	1.37143	3.52686e-06		-15.6	1.41853	1.07818e-06
-15.7	1.39048	2.50354e-06		-15.6	1.4377	7.61983e-07
-15.7	1.40952	1.76763e-06		-15.6	1.45687	5.36644e-07
-15.7	1.42857	1.24168e-06		-15.6	1.47604	3.76744e-07
-15.7	1.44762	8.68043e-07		-15.6	1.49521	2.6373e-07
-15.7	1.46667	6.04111e-07		-15.6	1.51438	1.84141e-07
-15.7	1.48571	4.1868e-07		-15.6	1.53355	1.28274e-07
-15.7	1.50476	2.89062e-07		-15.6	1.55272	8.91724e-08
-15.7	1.52381	1.98885e-07		-15.6	1.57189	6.18745e-08
-15.7	1.54286	1.36423e-07		-15.6	1.59105	4.28601e-08
-15.7	1.56191	9.33282e-08		-15.6	1.61022	2.96416e-08
-15.7	1.58095	6.37012e-08		-15.6	1.62939	2.04684e-08
-15.7	1.6	4.33961e-08		-15.6	1.64856	1.41124e-08
-15.7	1.61905	2.95167e-08		-15.6	1.66773	9.71467e-09
-15.7	1.6381	2.00505e-08		-15.6	1.6869	6.67619e-09
-15.7	1.65714	1.36056e-08		-15.6	1.70607	4.57977e-09
-15.7	1.67619	9.22393e-09		-15.6	1.72524	3.13546e-09
-15.7	1.69524	6.24809e-09		-15.6	1.74441	2.14202e-09
-15.7	1.71429	4.22872e-09		-15.6	1.76358	1.4599e-09
-15.7	1.73333	2.85931e-09		-15.6	1.78275	9.9246e-10
-15.7	1.75238	1.93123e-09		-15.6	1.80192	6.72834e-10
-15.7	1.77143	1.30267e-09		-15.6	1.82109	4.54805e-10
-15.7	1.79048	8.77304e-10		-15.6	1.84026	3.06469e-10
-15.7	1.80952	5.89737e-10		-15.6	1.85943	2.05837e-10
-15.7	1.82857	3.95577e-10		-15.6	1.87859	1.37774e-10
-15.7	1.84762	2.64693e-10		-15.6	1.89776	9.18901e-11
-15.7	1.86667	1.76632e-10		-15.6	1.91693	6.10625e-11
-15.7	1.88571	1.17518e-10		-15.6	1.9361	4.04246e-11
-15.7	1.90476	7.79363e-11		-15.6	1.95527	2.66591e-11
-15.7	1.92381	5.15098e-11		-15.6	1.97444	1.75125e-11
-15.7	1.94286	3.39216e-11		-15.6	1.99361	1.14586e-11
-15.7	1.96191	2.22554e-11		-15.6	2.01278	7.46751e-12
-15.7	1.98095	1.4545e-11		-15.6	2.03195	4.84697e-12
-15.7	2	9.46828e-12		-15.6	2.05112	3.13334e-12
-15.7	2.01905	6.13864e-12		-15.6	2.07029	2.01735e-12
-15.7	2.0381	3.96365e-12		-15.6	2.08946	1.29358e-12
-15.7	2.05714	2.54874e-12		-15.6	2.10863	8.26113e-13
-15.7	2.07619	1.63213e-12		-15.6	2.1278	5.25447e-13
-15.7	2.09524	1.04083e-12		-15.6	2.14697	3.32863e-13
-15.7	2.11429	6.61008e-13		-15.6	2.16613	2.10018e-13
-15.7	2.13333	4.18064e-13		-15.6	2.1853	1.31981e-13
-15.7	2.15238	2.63331e-13		-15.6	2.20447	8.26123e-14
-15.7	2.17143	1.65196e-13		-15.6	2.22364	5.15067e-14
-15.7	2.19048	1.03218e-13		-15.6	2.24281	3.19877e-14
-15.7	2.20952	6.42388e-14		-15.6	2.26198	1.97887e-14
-15.7	2.22857	3.9824e-14		-15.6	2.28115	1.2195e-14
-15.7	2.24762	2.45939e-14		-15.6	2.30032	7.48665e-15
-15.7	2.26667	1.51312e-14		-15.6	2.31949	4.57883e-15
-15.7	2.28571	9.27504e-15		-15.6	2.33866	2.78996e-15
-15.7	2.30476	5.6648e-15		-15.6	2.35783	1.69369e-15
-15.7	2.32381	3.44757e-15		-15.6	2.377	1.02442e-15
-15.7	2.34286	2.0909e-15		-15.6	2.39617	6.17377e-16
-15.7	2.36191	1.2638e-15		-15.6	2.41534	3.70736e-16
-15.7	2.38095	7.6134e-16		-15.6	2.43451	2.2184e-16
-15.7	2.4	4.5716e-16		-15.6	2.45367	1.32279e-16
-15.7	2.41905	2.73638e-16		-15.6	2.47284	7.86028e-17
-15.7	2.4381	1.63279e-16		-15.6	2.49201	4.65473e-17
-15.7	2.45714	9.71313e-17		-15.6	2.51118	2.74712e-17
-15.7	2.47619	5.76081e-17		-15.6	2.53035	1.61586e-17
-15.7	2.49524	3.40664e-17		-15.6	2.54952	9.47298e-18
-15.7	2.51429	2.00866e-17		-15.6	2.56869	5.53533e-18
-15.7	2.53333	1.18097e-17		-15.6	2.58786	3.22395e-18
-15.7	2.55238	6.9236e-18		-15.6	2.60703	1.87169e-18
-15.7	2.57143	4.04761e-18		-15.6	2.6262	1.08317e-18
-15.7	2.59048	2.35961e-18		-15.6	2.64537	6.24862e-19
-15.7	2.60952	1.37171e-18		-15.6	2.66454	3.59345e-19
-15.7	2.62857	7.95169e-19		-15.6	2.68371	2.0601e-19
-15.7	2.64762	4.59652e-19		-15.6	2.70288	1.1774e-19
-15.7	2.66667	2.6495e-19		-15.6	2.72205	6.70859e-20
-15.7	2.68571	1.52284e-19		-15.6	2.74121	3.81078e-20
-15.7	2.70476	8.72741e-20		-15.6	2.76038	2.15814e-20
-15.7	2.72381	4.9871e-20		-15.6	2.77955	1.21853e-20
-15.7	2.74286	2.84135e-20		-15.6	2.79872	6.85941e-21
-15.7	2.76191	1.61399e-20		-15.6	2.81789	3.84979e-21
-15.7	2.78095	9.1403e-21		-15.6	2.83706	2.15422e-21
-15.7	2.8	5.16042e-21		-15.6	2.85623	1.20184e-21
-15.7	2.81905	2.90441e-21		-15.6	2.8754	6.68513e-22
-15.7	2.8381	1.62953e-21		-15.6	2.89457	3.70748e-22
-15.7	2.85714	9.11346e-22		-15.6	2.91374	2.05e-22
-15.7	2.87619	5.08046e-22		-15.6	2.93291	1.13015e-22
-15.7	2.89524	2.82298e-22		-15.6	2.95208	6.2118e-23
-15.7	2.91429	1.56344e-22		-15.6	2.97125	3.40409e-23
-15.7	2.93333	8.63007e-23		-15.6	2.99042	1.85987e-23
-15.7	2.95238	4.74778e-23		-15.6	3.00959	1.01311e-23
-15.7	2.97143	2.60316e-23		-15.6	3.02875	5.50201e-24
-15.7	2.99048	1.42244e-23		-15.6	3.04792	2.979e-24
-15.7	3.00952	7.74605e-24		-15.6	3.06709	1.60805e-24
-15.7	3.02857	4.20371e-24		-15.6	3.08626	8.65374e-25
-15.7	3.04762	2.27345e-24		-15.6	3.10543	4.64278e-25
-15.7	3.06667	1.22526e-24		-15.6	3.1246	2.48323e-25
-15.7	3.08571	6.58054e-25		-15.6	3.14377	1.32408e-25
-15.7	3.10476	3.5219e-25		-15.6	3.16294	7.03821e-26
-15.7	3.12381	1.87833e-25		-15.6	3.18211	3.72957e-26
-15.7	3.14286	9.98261e-26		-15.6	3.20128	1.97014e-26
-15.7	3.16191	5.28678e-26		-15.6	3.22045	1.03746e-26
-15.7	3.18095	2.79005e-26		-15.6	3.23962	5.44594e-27
-15.7	3.2	1.46725e-26		-15.6	3.25879	2.8497e-27
-15.7	3.21905	7.68903e-27		-15.6	3.27796	1.48643e-27
-15.7	3.2381	4.01523e-27		-15.6	3.29713	7.72868e-28
-15.7	3.25714	2.08941e-27		-15.6	3.31629	4.00565e-28
-15.7	3.27619	1.08346e-27		-15.6	3.33546	2.0694e-28
-15.7	3.29524	5.59857e-28		-15.6	3.35463	1.06565e-28
-15.7	3.31429	2.88284e-28		-15.6	3.3738	5.46988e-29
-15.7	3.33333	1.47926e-28		-15.6	3.39297	2.79854e-29
-15.7	3.35238	7.56402e-29		-15.6	3.41214	1.42715e-29
-15.7	3.37143	3.8543e-29		-15.6	3.43131	7.25415e-30
-15.7	3.39048	1.95717e-29		-15.6	3.45048	3.67521e-30
-15.7	3.40952	9.90379e-30		-15.6	3.46965	1.85588e-30
-15.7	3.42857	4.99424e-30		-15.6	3.48882	9.34086e-31
-15.7	3.44762	2.50978e-30		-15.6	3.50799	4.68586e-31
-15.7	3.46667	1.25691e-30		-15.6	3.52716	2.34291e-31
-15.7	3.48571	6.27301e-31		-15.6	3.54633	1.16756e-31
-15.7	3.50476	3.12001e-31		-15.6	3.5655	5.79908e-32
-15.7	3.52381	1.54649e-31		-15.6	3.58467	2.87073e-32
-15.7	3.54286	7.63933e-32		-15.6	3.60383	1.41637e-32
-15.7	3.56191	3.7608e-32		-15.6	3.623	6.96477e-33
-15.7	3.58095	1.84513e-32		-15.6	3.64217	3.41337e-33
-15.7	3.6	9.02191e-33		-15.6	3.66134	1.66725e-33
-15.7	3.61905	4.39642e-33		-15.6	3.68051	8.11634e-34
-15.7	3.6381	2.13516e-33		-15.6	3.69968	3.93783e-34
-15.7	3.65714	1.03347e-33		-15.6	3.71885	1.9041e-34
-15.7	3.67619	4.9854e-34		-15.6	3.73802	9.17602e-35
-15.7	3.69524	2.39687e-34		-15.6	3.75719	4.40709e-35
-15.7	3.71429	1.1485e-34		-15.6	3.77636	2.1095e-35
-15.7	3.73333	5.48488e-35		-15.6	3.79553	1.00631e-35
-15.7	3.75238	2.61066e-35		-15.6	3.8147	4.78425e-36
-15.7	3.77143	1.23847e-35		-15.6	3.83387	2.26683e-36
-15.7	3.79048	5.85562e-36		-15.6	3.85304	1.0704e-36
-15.7	3.80952	2.75941e-36		-15.6	3.8722	5.03724e-37
-15.7	3.82857	1.29604e-36		-15.6	3.89137	2.36244e-37
-15.7	3.84762	6.06711e-37		-15.6	3.91054	1.10419e-37
-15.7	3.86667	2.83078e-37		-15.6	3.92971	5.14335e-38
-15.7	3.88571	1.31642e-37		-15.6	3.94888	2.3876e-38
-15.7	3.90476	6.10165e-38		-15.6	3.96805	1.10456e-38
-15.7	3.92381	2.81882e-38		-15.6	3.98722	5.0925e-39
-15.7	3.94286	1.29794e-38		-15.6	4.00639	2.33982e-39
-15.7	3.96191	5.95678e-39		-15.6	4.02556	1.07138e-39
-15.7	3.98095	2.72482e-39		-15.6	4.04473	4.88892e-40
-15.7	4	1.24233e-39		-15.6	4.0639	2.22325e-40
-15.7	4.01905	5.64553e-40		-15.6	4.08307	1.00756e-40
-15.7	4.0381	2.55709e-40		-15.6	4.10224	4.55046e-41
-15.7	4.05714	1.15441e-40		-15.6	4.12141	2.04807e-41
-15.7	4.07619	5.19452e-41		-15.6	4.14058	9.18619e-42
-15.7	4.09524	2.32972e-41		-15.6	4.15974	4.10608e-42
-15.7	4.11429	1.04144e-41		-15.6	4.17891	1.82902e-42
-15.7	4.13333	4.64024e-42		-15.6	4.19808	8.11914e-43
-15.7	4.15238	2.06071e-42		-15.6	4.21725	3.59169e-43
-15.7	4.17143	9.12152e-43		-15.6	4.23642	1.58338e-43
-15.7	4.19048	4.02428e-43		-15.6	4.25559	6.9561e-44
-15.7	4.20952	1.76962e-43		-15.6	4.27476	3.04539e-44
-15.7	4.22857	7.75608e-44		-15.6	4.29393	1.32866e-44
-15.7	4.24762	3.38824e-44		-15.6	4.3131	5.77666e-45
-15.7	4.26667	1.47528e-44		-15.6	4.33227	2.50284e-45
-15.7	4.28571	6.40239e-45		-15.6	4.35144	1.08064e-45
-15.7	4.30476	2.76934e-45		-15.6	4.37061	4.64962e-46
-15.7	4.32381	1.19392e-45		-15.6	4.38978	1.99363e-46
-15.7	4.34286	5.13026e-46		-15.6	4.40895	8.51845e-47
-15.7	4.36191	2.19718e-46		-15.6	4.42812	3.62714e-47
-15.7	4.38095	9.37892e-47		-15.6	4.44728	1.53906e-47
-15.7	4.4	3.99025e-47		-15.6	4.46645	6.50781e-48
-15.7	4.41905	1.69202e-47		-15.6	4.48562	2.7422e-48
-15.7	4.4381	7.15103e-48		-15.6	4.50479	1.15146e-48
-15.7	4.45714	3.01221e-48		-15.6	4.52396	4.81816e-49
-15.7	4.47619	1.26461e-48		-15.6	4.54313	2.00909e-49
-15.7	4.49524	5.29151e-49		-15.6	4.5623	8.34832e-50
-15.7	4.51429	2.20675e-49		-15.6	4.58147	3.45686e-50
-15.7	4.53333	9.1722e-50		-15.6	4.60064	1.42642e-50
-15.7	4.55238	3.79963e-50		-15.6	4.61981	5.86534e-51
-15.7	4.57143	1.56875e-50		-15.6	4.63898	2.40337e-51
-15.7	4.59048	6.45518e-51		-15.6	4.65815	9.81357e-52
-15.7	4.60952	2.64731e-51		-15.6	4.67732	3.99313e-52
-15.7	4.62857	1.08203e-51		-15.6	4.69649	1.61912e-52
-15.7	4.64762	4.4077e-52		-15.6	4.71566	6.5422e-53
-15.7	4.66667	1.78946e-52		-15.6	4.73482	2.63419e-53
-15.7	4.68571	7.24041e-53		-15.6	4.75399	1.05693e-53
-15.7	4.70476	2.91969e-53		-15.6	4.77316	4.22595e-54
-15.7	4.72381	1.17339e-53		-15.6	4.79233	1.68375e-54
-15.7	4.74286	4.69974e-54		-15.6	4.8115	6.68512e-55
-15.7	4.76191	1.876e-54		-15.6	4.83067	2.64494e-55
-15.7	4.78095	7.46305e-55		-15.6	4.84984	1.04279e-55
-15.7	4.8	2.95885e-55		-15.6	4.86901	4.0969e-56
-15.7	4.81905	1.1691e-55		-15.6	4.88818	1.60394e-56
-15.7	4.8381	4.60361e-56		-15.6	4.90735	6.2574e-57
-15.7	4.85714	1.80661e-56		-15.6	4.92652	2.43262e-57
-15.7	4.87619	7.06555e-57		-15.6	4.94569	9.42386e-58
-15.7	4.89524	2.75386e-57		-15.6	4.96486	3.63795e-58
-15.7	4.91429	1.06967e-57		-15.6	4.98403	1.39945e-58
-15.7	4.93333	4.14068e-58		-15.6	5.0032	5.36454e-59
-15.7	4.95238	1.59736e-58		-15.6	5.02236	2.04918e-59
-15.7	4.97143	6.14103e-59		-15.6	5.04153	7.80009e-60
-15.7	4.99048	2.35281e-59		-15.6	5.0607	2.95863e-60
-15.7	5.00952	8.98335e-60		-15.6	5.07987	1.11829e-60
-15.7	5.02857	3.41817e-60		-15.6	5.09904	4.21202e-61
-15.7	5.04762	1.29614e-60		-15.6	5.11821	1.58088e-61
-15.7	5.06667	4.89791e-61		-15.6	5.13738	5.91258e-62
-15.7	5.08571	1.84446e-61		-15.6	5.15655	2.20357e-62
-15.7	5.10476	6.92193e-62		-15.6	5.17572	8.18367e-63
-15.7	5.12381	2.5887e-62		-15.6	5.19489	3.02859e-63
-15.7	5.14286	9.6479e-63		-15.6	5.21406	1.11687e-63
-15.7	5.16191	3.58327e-63		-15.6	5.23323	4.10428e-64
-15.7	5.18095	1.32623e-63		-15.6	5.2524	1.50294e-64
-15.7	5.2	4.8916e-64		-15.6	5.27157	5.48424e-65
-15.7	5.21905	1.79794e-64		-15.6	5.29074	1.99417e-65
-15.7	5.2381	6.58551e-65		-15.6	5.3099	7.22565e-66
-15.7	5.25714	2.40377e-65		-15.6	5.32907	2.60893e-66
-15.7	5.27619	8.7435e-66		-15.6	5.34824	9.38683e-67
-15.7	5.29524	3.16931e-66		-15.6	5.36741	3.36546e-67
-15.7	5.31429	1.1448e-66		-15.6	5.38658	1.20238e-67
-15.7	5.33333	4.12081e-67		-15.6	5.40575	4.28062e-68
-15.7	5.35238	1.47815e-67		-15.6	5.42492	1.5186e-68
-15.7	5.37143	5.2837e-68		-15.6	5.44409	5.36845e-69
-15.7	5.39048	1.88209e-68		-15.6	5.46326	1.89114e-69
-15.7	5.40952	6.68076e-69		-15.6	5.48243	6.6385e-70
-15.7	5.42857	2.36316e-69		-15.6	5.5016	2.32212e-70
-15.7	5.44762	8.32989e-70		-15.6	5.52077	8.09414e-71
-15.7	5.46667	2.92594e-70		-15.6	5.53994	2.81142e-71
-15.7	5.48571	1.02417e-70		-15.6	5.55911	9.73085e-72
-15.7	5.50476	3.57236e-71		-15.6	5.57828	3.35618e-72
-15.7	5.52381	1.2417e-71		-15.6	5.59744	1.15348e-72
-15.7	5.54286	4.30087e-72		-15.6	5.61661	3.95044e-73
-15.7	5.56191	1.48447e-72		-15.6	5.63578	1.34819e-73
-15.7	5.58095	5.10579e-73		-15.6	5.65495	4.58484e-74
-15.7	5.6	1.74996e-73		-15.6	5.67412	1.55371e-74
-15.7	5.61905	5.97682e-74		-15.6	5.69329	5.24666e-75
-15.7	5.6381	2.03416e-74		-15.6	5.71246	1.7655e-75
-15.7	5.65714	6.89882e-75		-15.6	5.73163	5.92001e-76
-15.7	5.67619	2.33151e-75		-15.6	5.7508	1.9781e-76
-15.7	5.69524	7.85184e-76		-15.6	5.76997	6.58632e-77
-15.7	5.71429	2.63499e-76		-15.6	5.78914	2.18529e-77
-15.7	5.73333	8.81164e-77		-15.6	5.80831	7.2251e-78
-15.7	5.75238	2.93634e-77		-15.6	5.82748	2.3804e-78
-15.7	5.77143	9.75051e-78		-15.6	5.84665	7.81496e-79
-15.7	5.79048	3.2264e-78		-15.6	5.86582	2.55667e-79
-15.7	5.80952	1.06385e-78		-15.6	5.88498	8.33473e-80
-15.7	5.82857	3.49551e-79		-15.6	5.90415	2.70757e-80
-15.7	5.84762	1.14449e-79		-15.6	5.92332	8.76474e-81
-15.7	5.86667	3.73405e-80		-15.6	5.94249	2.82728e-81
-15.7	5.88571	1.214e-80		-15.6	5.96166	9.08803e-82
-15.7	5.90476	3.93301e-81		-15.6	5.98083	2.911e-82
-15.7	5.92381	1.26969e-81		-15.6	6	9.29147e-83
-15.7	5.94286	4.08452e-82		-15.55	0	0.000980097
-15.7	5.96191	1.30933e-82		-15.55	0.01917	0.00201
-15.7	5.98095	4.18241e-83		-15.55	0.03834	0.0032
-15.7	6	1.33128e-83		-15.55	0.05751	0.00446
-15.65	0	0.00658		-15.55	0.07668	0.00575
-15.65	0.01905	0.01272		-15.55	0.09585	0.00695
-15.65	0.0381	0.01745		-15.55	0.11502	0.00792
-15.65	0.05714	0.02034		-15.55	0.13419	0.00856
-15.65	0.07619	0.02195		-15.55	0.15336	0.00879
-15.65	0.09524	0.02258		-15.55	0.17252	0.00857
-15.65	0.11429	0.02252		-15.55	0.19169	0.00791
-15.65	0.13333	0.02208		-15.55	0.21086	0.00685
-15.65	0.15238	0.02161		-15.55	0.23003	0.00549
-15.65	0.17143	0.02144		-15.55	0.2492	0.00395
-15.65	0.19048	0.02177		-15.55	0.26837	0.00239
-15.65	0.20952	0.02263		-15.55	0.28754	0.000976445
-15.65	0.22857	0.02386		-15.55	0.30671	0.000608659
-15.65	0.24762	0.02525		-15.55	0.32588	0.00139
-15.65	0.26667	0.02656		-15.55	0.34505	0.00189
-15.65	0.28571	0.02758		-15.55	0.36422	0.00198
-15.65	0.30476	0.0282		-15.55	0.38339	0.00167
-15.65	0.32381	0.02837		-15.55	0.40256	0.00106
-15.65	0.34286	0.02808		-15.55	0.42173	0.0005954
-15.65	0.36191	0.02736		-15.55	0.4409	0.0014
-15.65	0.38095	0.0263		-15.55	0.46006	0.00261
-15.65	0.4	0.02497		-15.55	0.47923	0.00385
-15.65	0.41905	0.02348		-15.55	0.4984	0.00502
-15.65	0.4381	0.02191		-15.55	0.51757	0.00604
-15.65	0.45714	0.02035		-15.55	0.53674	0.00686
-15.65	0.47619	0.01883		-15.55	0.55591	0.00747
-15.65	0.49524	0.01741		-15.55	0.57508	0.00785
-15.65	0.51429	0.01609		-15.55	0.59425	0.00802
-15.65	0.53333	0.01488		-15.55	0.61342	0.008
-15.65	0.55238	0.01376		-15.55	0.63259	0.00781
-15.65	0.57143	0.01271		-15.55	0.65176	0.00749
-15.65	0.59048	0.01173		-15.55	0.67093	0.00708
-15.65	0.60952	0.01079		-15.55	0.6901	0.00659
-15.65	0.62857	0.00989		-15.55	0.70927	0.00607
-15.65	0.64762	0.00904		-15.55	0.72844	0.00552
-15.65	0.66667	0.00823		-15.55	0.7476	0.00497
-15.65	0.68571	0.00746		-15.55	0.76677	0.00444
-15.65	0.70476	0.00674		-15.55	0.78594	0.00392
-15.65	0.72381	0.00607		-15.55	0.80511	0.00344
-15.65	0.74286	0.00545		-15.55	0.82428	0.00299
-15.65	0.76191	0.00487		-15.55	0.84345	0.00258
-15.65	0.78095	0.00434		-15.55	0.86262	0.0022
-15.65	0.8	0.00385		-15.55	0.88179	0.00187
-15.65	0.81905	0.0034		-15.55	0.90096	0.00157
-15.65	0.8381	0.00299		-15.55	0.92013	0.00131
-15.65	0.85714	0.00261		-15.55	0.9393	0.00109
-15.65	0.87619	0.00226		-15.55	0.95847	0.000894908
-15.65	0.89524	0.00195		-15.55	0.97764	0.000731153
-15.65	0.91429	0.00167		-15.55	0.99681	0.000593152
-15.65	0.93333	0.00142		-15.55	1.01597	0.000477847
-15.65	0.95238	0.0012		-15.55	1.03514	0.000382301
-15.65	0.97143	0.000999333		-15.55	1.05431	0.000303767
-15.65	0.99048	0.000828493		-15.55	1.07348	0.000239724
-15.65	1.00952	0.000681179		-15.55	1.09265	0.000187904
-15.65	1.02857	0.000555411		-15.55	1.11182	0.000146296
-15.65	1.04762	0.000449111		-15.55	1.13099	0.00011314
-15.65	1.06667	0.000360162		-15.55	1.15016	8.69194e-05
-15.65	1.08571	0.000286468		-15.55	1.16933	6.63373e-05
-15.65	1.10476	0.000226011		-15.55	1.1885	5.03011e-05
-15.65	1.12381	0.00017689		-15.55	1.20767	3.78982e-05
-15.65	1.14286	0.000137357		-15.55	1.22684	2.83747e-05
-15.65	1.16191	0.000105834		-15.55	1.24601	2.11143e-05
-15.65	1.18095	8.09274e-05		-15.55	1.26518	1.56179e-05
-15.65	1.2	6.14213e-05		-15.55	1.28435	1.14853e-05
-15.65	1.21905	4.62769e-05		-15.55	1.30351	8.39892e-06
-15.65	1.2381	3.46179e-05		-15.55	1.32268	6.10879e-06
-15.65	1.25714	2.57158e-05		-15.55	1.34185	4.42017e-06
-15.65	1.27619	1.8973e-05		-15.55	1.36102	3.1826e-06
-15.65	1.29524	1.39055e-05		-15.55	1.38019	2.28086e-06
-15.65	1.31429	1.01259e-05		-15.55	1.39936	1.62746e-06
-15.65	1.33333	7.32754e-06		-15.55	1.41853	1.1565e-06
-15.65	1.35238	5.27049e-06		-15.55	1.4377	8.18713e-07
-15.65	1.37143	3.76883e-06		-15.55	1.45687	5.77572e-07
-15.65	1.39048	2.67993e-06		-15.55	1.47604	4.06165e-07
-15.65	1.40952	1.89545e-06		-15.55	1.49521	2.8481e-07
-15.65	1.42857	1.33379e-06		-15.55	1.51438	1.99201e-07
-15.65	1.44762	9.34051e-07		-15.55	1.53355	1.39004e-07
-15.65	1.46667	6.51178e-07		-15.55	1.55272	9.68e-08
-15.65	1.48571	4.52082e-07		-15.55	1.57189	6.72855e-08
-15.65	1.50476	3.12663e-07		-15.55	1.59105	4.66916e-08
-15.65	1.52381	2.15495e-07		-15.55	1.61022	3.23502e-08
-15.65	1.54286	1.48071e-07		-15.55	1.62939	2.23801e-08
-15.65	1.56191	1.01471e-07		-15.55	1.64856	1.54595e-08
-15.65	1.58095	6.93787e-08		-15.55	1.66773	1.06625e-08
-15.65	1.6	4.73456e-08		-15.55	1.6869	7.34201e-09
-15.65	1.61905	3.22591e-08		-15.55	1.70607	5.04664e-09
-15.65	1.6381	2.19519e-08		-15.55	1.72524	3.46221e-09
-15.65	1.65714	1.49224e-08		-15.55	1.74441	2.37021e-09
-15.65	1.67619	1.0135e-08		-15.55	1.76358	1.61889e-09
-15.65	1.69524	6.87793e-09		-15.55	1.78275	1.10295e-09
-15.65	1.71429	4.66382e-09		-15.55	1.80192	7.49407e-10
-15.65	1.73333	3.15964e-09		-15.55	1.82109	5.07713e-10
-15.65	1.75238	2.13835e-09		-15.55	1.84026	3.42909e-10
-15.65	1.77143	1.44534e-09		-15.55	1.85943	2.3085e-10
-15.65	1.79048	9.7544e-10		-15.55	1.87859	1.54883e-10
-15.65	1.80952	6.57124e-10		-15.55	1.89776	1.03549e-10
-15.65	1.82857	4.41755e-10		-15.55	1.91693	6.89774e-11
-15.65	1.84762	2.96262e-10		-15.55	1.9361	4.57766e-11
-15.65	1.86667	1.98156e-10		-15.55	1.95527	3.02637e-11
-15.65	1.88571	1.32148e-10		-15.55	1.97444	1.99303e-11
-15.65	1.90476	8.78487e-11		-15.55	1.99361	1.30736e-11
-15.65	1.92381	5.82022e-11		-15.55	2.01278	8.54178e-12
-15.65	1.94286	3.84233e-11		-15.55	2.03195	5.55855e-12
-15.65	1.96191	2.52717e-11		-15.55	2.05112	3.60268e-12
-15.65	1.98095	1.65579e-11		-15.55	2.07029	2.32561e-12
-15.65	2	1.0806e-11		-15.55	2.08946	1.49517e-12
-15.65	2.01905	7.02389e-12		-15.55	2.10863	9.57398e-13
-15.65	2.0381	4.54697e-12		-15.55	2.1278	6.10581e-13
-15.65	2.05714	2.93145e-12		-15.55	2.14697	3.87837e-13
-15.65	2.07619	1.88213e-12		-15.55	2.16613	2.45368e-13
-15.65	2.09524	1.20343e-12		-15.55	2.1853	1.54618e-13
-15.65	2.11429	7.66297e-13		-15.55	2.20447	9.70475e-14
-15.65	2.13333	4.85949e-13		-15.55	2.22364	6.06742e-14
-15.65	2.15238	3.06912e-13		-15.55	2.24281	3.77861e-14
-15.65	2.17143	1.93055e-13		-15.55	2.26198	2.34413e-14
-15.65	2.19048	1.20952e-13		-15.55	2.28115	1.44866e-14
-15.65	2.20952	7.54803e-14		-15.55	2.30032	8.91876e-15
-15.65	2.22857	4.69209e-14		-15.55	2.31949	5.47028e-15
-15.65	2.24762	2.90562e-14		-15.55	2.33866	3.3427e-15
-15.65	2.26667	1.79259e-14		-15.55	2.35783	2.0351e-15
-15.65	2.28571	1.10185e-14		-15.55	2.377	1.2345e-15
-15.65	2.30476	6.74836e-15		-15.55	2.39617	7.46152e-16
-15.65	2.32381	4.11848e-15		-15.55	2.41534	4.49382e-16
-15.65	2.34286	2.5048e-15		-15.55	2.43451	2.69694e-16
-15.65	2.36191	1.51823e-15		-15.55	2.45367	1.61291e-16
-15.65	2.38095	9.17203e-16		-15.55	2.47284	9.61284e-17
-15.65	2.4	5.52315e-16		-15.55	2.49201	5.70966e-17
-15.65	2.41905	3.31538e-16		-15.55	2.51118	3.37989e-17
-15.65	2.4381	1.98396e-16		-15.55	2.53035	1.99409e-17
-15.65	2.45714	1.18362e-16		-15.55	2.54952	1.17261e-17
-15.65	2.47619	7.04037e-17		-15.55	2.56869	6.87294e-18
-15.65	2.49524	4.17547e-17		-15.55	2.58786	4.01538e-18
-15.65	2.51429	2.46922e-17		-15.55	2.60703	2.33841e-18
-15.65	2.53333	1.45605e-17		-15.55	2.6262	1.35749e-18
-15.65	2.55238	8.56179e-18		-15.55	2.64537	7.85576e-19
-15.65	2.57143	5.02036e-18		-15.55	2.66454	4.53197e-19
-15.65	2.59048	2.93557e-18		-15.55	2.68371	2.60641e-19
-15.65	2.60952	1.71174e-18		-15.55	2.70288	1.4944e-19
-15.65	2.62857	9.95345e-19		-15.55	2.72205	8.54219e-20
-15.65	2.64762	5.77155e-19		-15.55	2.74121	4.86807e-20
-15.65	2.66667	3.33725e-19		-15.55	2.76038	2.7659e-20
-15.65	2.68571	1.92421e-19		-15.55	2.77955	1.5668e-20
-15.65	2.70476	1.1063e-19		-15.55	2.79872	8.84907e-21
-15.65	2.72381	6.3421e-20		-15.55	2.81789	4.98298e-21
-15.65	2.74286	3.62513e-20		-15.55	2.83706	2.79764e-21
-15.65	2.76191	2.06598e-20		-15.55	2.85623	1.56606e-21
-15.65	2.78095	1.17388e-20		-15.55	2.8754	8.74062e-22
-15.65	2.8	6.64965e-21		-15.55	2.89457	4.86398e-22
-15.65	2.81905	3.75523e-21		-15.55	2.91374	2.69871e-22
-15.65	2.8381	2.11406e-21		-15.55	2.93291	1.49292e-22
-15.65	2.85714	1.18639e-21		-15.55	2.95208	8.23435e-23
-15.65	2.87619	6.63666e-22		-15.55	2.97125	4.52828e-23
-15.65	2.89524	3.70056e-22		-15.55	2.99042	2.48282e-23
-15.65	2.91429	2.05669e-22		-15.55	3.00959	1.35725e-23
-15.65	2.93333	1.1393e-22		-15.55	3.02875	7.39735e-24
-15.65	2.95238	6.29017e-23		-15.55	3.04792	4.01964e-24
-15.65	2.97143	3.46124e-23		-15.55	3.06709	2.17765e-24
-15.65	2.99048	1.89817e-23		-15.55	3.08626	1.17619e-24
-15.65	3.00952	1.03744e-23		-15.55	3.10543	6.33351e-25
-15.65	3.02857	5.6508e-24		-15.55	3.1246	3.40006e-25
-15.65	3.04762	3.06736e-24		-15.55	3.14377	1.8197e-25
-15.65	3.06667	1.65929e-24		-15.55	3.16294	9.70898e-26
-15.65	3.08571	8.94495e-25		-15.55	3.18211	5.16424e-26
-15.65	3.10476	4.80536e-25		-15.55	3.20128	2.73836e-26
-15.65	3.12381	2.57255e-25		-15.55	3.22045	1.44751e-26
-15.65	3.14286	1.37242e-25		-15.55	3.23962	7.62768e-27
-15.65	3.16191	7.29621e-26		-15.55	3.25879	4.00681e-27
-15.65	3.18095	3.86536e-26		-15.55	3.27796	2.09813e-27
-15.65	3.2	2.04063e-26		-15.55	3.29713	1.0952e-27
-15.65	3.21905	1.07354e-26		-15.55	3.31629	5.69863e-28
-15.65	3.2381	5.62806e-27		-15.55	3.33546	2.95571e-28
-15.65	3.25714	2.94022e-27		-15.55	3.35463	1.52814e-28
-15.65	3.27619	1.53068e-27		-15.55	3.3738	7.87531e-29
-15.65	3.29524	7.94103e-28		-15.55	3.39297	4.0455e-29
-15.65	3.31429	4.1054e-28		-15.55	3.41214	2.07143e-29
-15.65	3.33333	2.11506e-28		-15.55	3.43131	1.05721e-29
-15.65	3.35238	1.08588e-28		-15.55	3.45048	5.37823e-30
-15.65	3.37143	5.55569e-29		-15.55	3.46965	2.72709e-30
-15.65	3.39048	2.83263e-29		-15.55	3.48882	1.37829e-30
-15.65	3.40952	1.43927e-29		-15.55	3.50799	6.94314e-31
-15.65	3.42857	7.28785e-30		-15.55	3.52716	3.48613e-31
-15.65	3.44762	3.67758e-30		-15.55	3.54633	1.74462e-31
-15.65	3.46667	1.84942e-30		-15.55	3.5655	8.70213e-32
-15.65	3.48571	9.26875e-31		-15.55	3.58467	4.32626e-32
-15.65	3.50476	4.6294e-31		-15.55	3.60383	2.14368e-32
-15.65	3.52381	2.30435e-31		-15.55	3.623	1.05868e-32
-15.65	3.54286	1.14313e-31		-15.55	3.64217	5.21105e-33
-15.65	3.56191	5.65157e-32		-15.55	3.66134	2.55645e-33
-15.65	3.58095	2.78467e-32		-15.55	3.68051	1.24997e-33
-15.65	3.6	1.36745e-32		-15.55	3.69968	6.09133e-34
-15.65	3.61905	6.69248e-33		-15.55	3.71885	2.95848e-34
-15.65	3.6381	3.2644e-33		-15.55	3.73802	1.43209e-34
-15.65	3.65714	1.58695e-33		-15.55	3.75719	6.90893e-35
-15.65	3.67619	7.68897e-34		-15.55	3.77636	3.32194e-35
-15.65	3.69524	3.71299e-34		-15.55	3.79553	1.59188e-35
-15.65	3.71429	1.78703e-34		-15.55	3.8147	7.60269e-36
-15.65	3.73333	8.57224e-35		-15.55	3.83387	3.61873e-36
-15.65	3.75238	4.09841e-35		-15.55	3.85304	1.71664e-36
-15.65	3.77143	1.95297e-35		-15.55	3.8722	8.11581e-37
-15.65	3.79048	9.27557e-36		-15.55	3.89137	3.82397e-37
-15.65	3.80952	4.39086e-36		-15.55	3.91054	1.79566e-37
-15.65	3.82857	2.0717e-36		-15.55	3.92971	8.4035e-38
-15.65	3.84762	9.74254e-37		-15.55	3.94888	3.91942e-38
-15.65	3.86667	4.56656e-37		-15.55	3.96805	1.82182e-38
-15.65	3.88571	2.13343e-37		-15.55	3.98722	8.43942e-39
-15.65	3.90476	9.93445e-38		-15.55	4.00639	3.89619e-39
-15.65	3.92381	4.61089e-38		-15.55	4.02556	1.79261e-39
-15.65	3.94286	2.13306e-38		-15.55	4.04473	8.2196e-40
-15.65	3.96191	9.83554e-39		-15.55	4.0639	3.75606e-40
-15.65	3.98095	4.52037e-39		-15.55	4.08307	1.71053e-40
-15.65	4	2.07076e-39		-15.55	4.10224	7.76321e-41
-15.65	4.01905	9.45512e-40		-15.55	4.12141	3.51129e-41
-15.65	4.0381	4.30314e-40		-15.55	4.14058	1.58272e-41
-15.65	4.05714	1.95203e-40		-15.55	4.15974	7.10972e-42
-15.65	4.07619	8.82612e-41		-15.55	4.17891	3.18281e-42
-15.65	4.09524	3.97773e-41		-15.55	4.19808	1.41997e-42
-15.65	4.11429	1.78683e-41		-15.55	4.21725	6.31326e-43
-15.65	4.13333	8.00046e-42		-15.55	4.23642	2.79728e-43
-15.65	4.15238	3.57049e-42		-15.55	4.25559	1.23516e-43
-15.65	4.17143	1.58827e-42		-15.55	4.27476	5.43523e-44
-15.65	4.19048	7.04207e-43		-15.55	4.29393	2.3835e-44
-15.65	4.20952	3.11213e-43		-15.55	4.3131	1.04164e-44
-15.65	4.22857	1.37087e-43		-15.55	4.33227	4.53648e-45
-15.65	4.24762	6.01885e-44		-15.55	4.35144	1.9689e-45
-15.65	4.26667	2.63396e-44		-15.55	4.37061	8.51585e-46
-15.65	4.28571	1.1489e-44		-15.55	4.38978	3.67056e-46
-15.65	4.30476	4.99498e-45		-15.55	4.40895	1.57665e-46
-15.65	4.32381	2.16451e-45		-15.55	4.42812	6.74898e-47
-15.65	4.34286	9.34886e-46		-15.55	4.44728	2.87897e-47
-15.65	4.36191	4.02468e-46		-15.55	4.46645	1.22386e-47
-15.65	4.38095	1.72693e-46		-15.55	4.48562	5.18471e-48
-15.65	4.4	7.38566e-47		-15.55	4.50479	2.18883e-48
-15.65	4.41905	3.14827e-47		-15.55	4.52396	9.20859e-49
-15.65	4.4381	1.33758e-47		-15.55	4.54313	3.86072e-49
-15.65	4.45714	5.66416e-48		-15.55	4.5623	1.61301e-49
-15.65	4.47619	2.39064e-48		-15.55	4.58147	6.7158e-50
-15.65	4.49524	1.00567e-48		-15.55	4.60064	2.78645e-50
-15.65	4.51429	4.21653e-49		-15.55	4.61981	1.15211e-50
-15.65	4.53333	1.76204e-49		-15.55	4.63898	4.74712e-51
-15.65	4.55238	7.3389e-50		-15.55	4.65815	1.9492e-51
-15.65	4.57143	3.0465e-50		-15.55	4.67732	7.97574e-52
-15.65	4.59048	1.26045e-50		-15.55	4.69649	3.25218e-52
-15.65	4.60952	5.19759e-51		-15.55	4.71566	1.3215e-52
-15.65	4.62857	2.13613e-51		-15.55	4.73482	5.35117e-53
-15.65	4.64762	8.74983e-52		-15.55	4.75399	2.15932e-53
-15.65	4.66667	3.57206e-52		-15.55	4.77316	8.68307e-54
-15.65	4.68571	1.45339e-52		-15.55	4.79233	3.47949e-54
-15.65	4.70476	5.89367e-53		-15.55	4.8115	1.38946e-54
-15.65	4.72381	2.38194e-53		-15.55	4.83067	5.52917e-55
-15.65	4.74286	9.59434e-54		-15.55	4.84984	2.1926e-55
-15.65	4.76191	3.85155e-54		-15.55	4.86901	8.66455e-56
-15.65	4.78095	1.54096e-54		-15.55	4.88818	3.41206e-56
-15.65	4.8	6.14442e-55		-15.55	4.90735	1.33897e-56
-15.65	4.81905	2.44175e-55		-15.55	4.92652	5.23613e-57
-15.65	4.8381	9.67057e-56		-15.55	4.94569	2.04048e-57
-15.65	4.85714	3.81707e-56		-15.55	4.96486	7.92391e-58
-15.65	4.87619	1.50154e-56		-15.55	4.98403	3.0664e-58
-15.65	4.89524	5.88661e-57		-15.55	5.0032	1.1825e-58
-15.65	4.91429	2.29995e-57		-15.55	5.02236	4.5442e-59
-15.65	4.93333	8.95558e-58		-15.55	5.04153	1.74018e-59
-15.65	4.95238	3.47527e-58		-15.55	5.0607	6.64072e-60
-15.65	4.97143	1.34401e-58		-15.55	5.07987	2.52532e-60
-15.65	4.99048	5.18003e-59		-15.55	5.09904	9.56976e-61
-15.65	5.00952	1.98966e-59		-15.55	5.11821	3.61382e-61
-15.65	5.02857	7.61621e-60		-15.55	5.13738	1.35992e-61
-15.65	5.04762	2.90544e-60		-15.55	5.15655	5.09966e-62
-15.65	5.06667	1.10458e-60		-15.55	5.17572	1.90568e-62
-15.65	5.08571	4.18496e-61		-15.55	5.19489	7.09643e-63
-15.65	5.10476	1.58014e-61		-15.55	5.21406	2.63336e-63
-15.65	5.12381	5.94574e-62		-15.55	5.23323	9.73782e-64
-15.65	5.14286	2.22958e-62		-15.55	5.2524	3.58834e-64
-15.65	5.16191	8.33192e-63		-15.55	5.27157	1.31767e-64
-15.65	5.18095	3.10293e-63		-15.55	5.29074	4.82168e-65
-15.65	5.2	1.1516e-63		-15.55	5.3099	1.75821e-65
-15.65	5.21905	4.25923e-64		-15.55	5.32907	6.38887e-66
-15.65	5.2381	1.56986e-64		-15.55	5.34824	2.31343e-66
-15.65	5.25714	5.76624e-65		-15.55	5.36741	8.34775e-67
-15.65	5.27619	2.11068e-65		-15.55	5.38658	3.00167e-67
-15.65	5.29524	7.69924e-66		-15.55	5.40575	1.07556e-67
-15.65	5.31429	2.79879e-66		-15.55	5.42492	3.8405e-68
-15.65	5.33333	1.01389e-66		-15.55	5.44409	1.36653e-68
-15.65	5.35238	3.66018e-67		-15.55	5.46326	4.84542e-69
-15.65	5.37143	1.31677e-67		-15.55	5.48243	1.71208e-69
-15.65	5.39048	4.72074e-68		-15.55	5.5016	6.0283e-70
-15.65	5.40952	1.68656e-68		-15.55	5.52077	2.11518e-70
-15.65	5.42857	6.00462e-69		-15.55	5.53994	7.39567e-71
-15.65	5.44762	2.13039e-69		-15.55	5.55911	2.57684e-71
-15.65	5.46667	7.53223e-70		-15.55	5.57828	8.94702e-72
-15.65	5.48571	2.65385e-70		-15.55	5.59744	3.09563e-72
-15.65	5.50476	9.3179e-71		-15.55	5.61661	1.06733e-72
-15.65	5.52381	3.26022e-71		-15.55	5.63578	3.66715e-73
-15.65	5.54286	1.13675e-71		-15.55	5.65495	1.25556e-73
-15.65	5.56191	3.94971e-72		-15.55	5.67412	4.28378e-74
-15.65	5.58095	1.36758e-72		-15.55	5.69329	1.45645e-74
-15.65	5.6	4.71876e-73		-15.55	5.71246	4.93453e-75
-15.65	5.61905	1.6225e-73		-15.55	5.73163	1.666e-75
-15.65	5.6381	5.5594e-74		-15.55	5.7508	5.60511e-76
-15.65	5.65714	1.89825e-74		-15.55	5.76997	1.8792e-76
-15.65	5.67619	6.45897e-75		-15.55	5.78914	6.27831e-77
-15.65	5.69524	2.19005e-75		-15.55	5.80831	2.09022e-77
-15.65	5.71429	7.39994e-76		-15.55	5.82748	6.93462e-78
-15.65	5.73333	2.49163e-76		-15.55	5.84665	2.29262e-78
-15.65	5.75238	8.36027e-77		-15.55	5.86582	7.55306e-79
-15.65	5.77143	2.79536e-77		-15.55	5.88498	2.47967e-79
-15.65	5.79048	9.31398e-78		-15.55	5.90415	8.11233e-80
-15.65	5.80952	3.09252e-78		-15.55	5.92332	2.64471e-80
-15.65	5.82857	1.02322e-78		-15.55	5.94249	8.59192e-81
-15.65	5.84762	3.3737e-79		-15.55	5.96166	2.78153e-81
-15.65	5.86667	1.10846e-79		-15.55	5.98083	8.97341e-82
-15.65	5.88571	3.62924e-80		-15.55	6	2.88478e-82
-15.65	5.90476	1.1841e-80		-15.5	0	0.000980098
-15.65	5.92381	3.8498e-81		-15.5	0.01917	0.00201
-15.65	5.94286	1.24728e-81		-15.5	0.03834	0.0032
-15.65	5.96191	4.0269e-82		-15.5	0.05751	0.00446
-15.65	5.98095	1.29555e-82		-15.5	0.07668	0.00575
-15.65	6	4.15347e-83		-15.5	0.09585	0.00695
-15.6	0	0.00658		-15.5	0.11502	0.00792
-15.6	0.01905	0.01272		-15.5	0.13419	0.00857
-15.6	0.0381	0.01745		-15.5	0.15336	0.0088
-15.6	0.05714	0.02034		-15.5	0.17252	0.00858
-15.6	0.07619	0.02196		-15.5	0.19169	0.00792
-15.6	0.09524	0.02259		-15.5	0.21086	0.00686
-15.6	0.11429	0.02253		-15.5	0.23003	0.0055
-15.6	0.13333	0.02209		-15.5	0.2492	0.00396
-15.6	0.15238	0.02163		-15.5	0.26837	0.00239
-15.6	0.17143	0.02146		-15.5	0.28754	0.000978532
-15.6	0.19048	0.02179		-15.5	0.30671	0.000606314
-15.6	0.20952	0.02265		-15.5	0.32588	0.0014
-15.6	0.22857	0.0239		-15.5	0.34505	0.0019
-15.6	0.24762	0.0253		-15.5	0.36422	0.00199
-15.6	0.26667	0.02662		-15.5	0.38339	0.00169
-15.6	0.28571	0.02765		-15.5	0.40256	0.00107
-15.6	0.30476	0.02829		-15.5	0.42173	0.000607838
-15.6	0.32381	0.02847		-15.5	0.4409	0.00141
-15.6	0.34286	0.02819		-15.5	0.46006	0.00263
-15.6	0.36191	0.02748		-15.5	0.47923	0.00388
-15.6	0.38095	0.02643		-15.5	0.4984	0.00506
-15.6	0.4	0.02511		-15.5	0.51757	0.0061
-15.6	0.41905	0.02362		-15.5	0.53674	0.00694
-15.6	0.4381	0.02205		-15.5	0.55591	0.00756
-15.6	0.45714	0.02049		-15.5	0.57508	0.00795
-15.6	0.47619	0.01897		-15.5	0.59425	0.00813
-15.6	0.49524	0.01755		-15.5	0.61342	0.00811
-15.6	0.51429	0.01623		-15.5	0.63259	0.00792
-15.6	0.53333	0.01502		-15.5	0.65176	0.00761
-15.6	0.55238	0.0139		-15.5	0.67093	0.00719
-15.6	0.57143	0.01285		-15.5	0.6901	0.00671
-15.6	0.59048	0.01186		-15.5	0.70927	0.00618
-15.6	0.60952	0.01092		-15.5	0.72844	0.00563
-15.6	0.62857	0.01002		-15.5	0.7476	0.00508
-15.6	0.64762	0.00917		-15.5	0.76677	0.00453
-15.6	0.66667	0.00835		-15.5	0.78594	0.00401
-15.6	0.68571	0.00758		-15.5	0.80511	0.00352
-15.6	0.70476	0.00686		-15.5	0.82428	0.00306
-15.6	0.72381	0.00618		-15.5	0.84345	0.00264
-15.6	0.74286	0.00555		-15.5	0.86262	0.00226
-15.6	0.76191	0.00497		-15.5	0.88179	0.00192
-15.6	0.78095	0.00443		-15.5	0.90096	0.00162
-15.6	0.8	0.00393		-15.5	0.92013	0.00135
-15.6	0.81905	0.00348		-15.5	0.9393	0.00112
-15.6	0.8381	0.00306		-15.5	0.95847	0.000924953
-15.6	0.85714	0.00267		-15.5	0.97764	0.000756689
-15.6	0.87619	0.00232		-15.5	0.99681	0.000614688
-15.6	0.89524	0.00201		-15.5	1.01597	0.000495869
-15.6	0.91429	0.00172		-15.5	1.03514	0.00039727
-15.6	0.93333	0.00146		-15.5	1.05431	0.000316106
-15.6	0.95238	0.00123		-15.5	1.07348	0.00024982
-15.6	0.97143	0.00103		-15.5	1.09265	0.000196103
-15.6	0.99048	0.000857295		-15.5	1.11182	0.000152906
-15.6	1.00952	0.000705874		-15.5	1.13099	0.00011843
-15.6	1.02857	0.000576387		-15.5	1.15016	9.11215e-05
-15.6	1.04762	0.000466763		-15.5	1.16933	6.96517e-05
-15.6	1.06667	0.000374879		-15.5	1.1885	5.28967e-05
-15.6	1.08571	0.000298627		-15.5	1.20767	3.99167e-05
-15.6	1.10476	0.000235965		-15.5	1.22684	2.99336e-05
-15.6	1.12381	0.000184968		-15.5	1.24601	2.23101e-05
-15.6	1.14286	0.000143855		-15.5	1.26518	1.65291e-05
-15.6	1.16191	0.000111018		-15.5	1.28435	1.21752e-05
-15.6	1.18095	8.50272e-05		-15.5	1.30351	8.91802e-06
-15.6	1.2	6.46375e-05		-15.5	1.32268	6.49704e-06
-15.6	1.21905	4.87798e-05		-15.5	1.34185	4.70888e-06
-15.6	1.2381	3.65504e-05		-15.5	1.36102	3.39611e-06
-15.6	1.25714	2.71966e-05		-15.5	1.38019	2.43793e-06
-15.6	1.27619	2.00991e-05		-15.5	1.39936	1.74245e-06
-15.6	1.29524	1.47557e-05		-15.5	1.41853	1.24028e-06
-15.6	1.31429	1.07632e-05		-15.5	1.4377	8.79501e-07
-15.6	1.33333	7.80206e-06		-15.5	1.45687	6.21502e-07
-15.6	1.35238	5.62143e-06		-15.5	1.47604	4.37797e-07
-15.6	1.37143	4.0267e-06		-15.5	1.49521	3.07512e-07
-15.6	1.39048	2.86825e-06		-15.5	1.51438	2.15446e-07
-15.6	1.40952	2.03215e-06		-15.5	1.53355	1.50599e-07
-15.6	1.42857	1.43246e-06		-15.5	1.55272	1.05056e-07
-15.6	1.44762	1.00489e-06		-15.5	1.57189	7.31528e-08
-15.6	1.46667	7.01776e-07		-15.5	1.59105	5.08535e-08
-15.6	1.48571	4.88052e-07		-15.5	1.61022	3.52975e-08
-15.6	1.50476	3.38122e-07		-15.5	1.62939	2.4464e-08
-15.6	1.52381	2.33444e-07		-15.5	1.64856	1.69308e-08
-15.6	1.54286	1.6068e-07		-15.5	1.66773	1.16997e-08
-15.6	1.56191	1.10301e-07		-15.5	1.6869	8.07196e-09
-15.6	1.58095	7.55452e-08		-15.5	1.70607	5.55951e-09
-15.6	1.6	5.16426e-08		-15.5	1.72524	3.82187e-09
-15.6	1.61905	3.52479e-08		-15.5	1.74441	2.62191e-09
-15.6	1.6381	2.40277e-08		-15.5	1.76358	1.79463e-09
-15.6	1.65714	1.63624e-08		-15.5	1.78275	1.22535e-09
-15.6	1.67619	1.11331e-08		-15.5	1.80192	8.34418e-10
-15.6	1.69524	7.56919e-09		-15.5	1.82109	5.66584e-10
-15.6	1.71429	5.14223e-09		-15.5	1.84026	3.8355e-10
-15.6	1.73333	3.4905e-09		-15.5	1.85943	2.58811e-10
-15.6	1.75238	2.36696e-09		-15.5	1.87859	1.74054e-10
-15.6	1.77143	1.60313e-09		-15.5	1.89776	1.16645e-10
-15.6	1.79048	1.0842e-09		-15.5	1.91693	7.78891e-11
-15.6	1.80952	7.31968e-10		-15.5	1.9361	5.18176e-11
-15.6	1.82857	4.93155e-10		-15.5	1.95527	3.43424e-11
-15.6	1.84762	3.3148e-10		-15.5	1.97444	2.26729e-11
-15.6	1.86667	2.22222e-10		-15.5	1.99361	1.49102e-11
-15.6	1.88571	1.48546e-10		-15.5	2.01278	9.76661e-12
-15.6	1.90476	9.8985e-11		-15.5	2.03195	6.37195e-12
-15.6	1.92381	6.57391e-11		-15.5	2.05112	4.14058e-12
-15.6	1.94286	4.35054e-11		-15.5	2.07029	2.67982e-12
-15.6	1.96191	2.86854e-11		-15.5	2.08946	1.72744e-12
-15.6	1.98095	1.88418e-11		-15.5	2.10863	1.10906e-12
-15.6	2	1.23277e-11		-15.5	2.1278	7.0919e-13
-15.6	2.01905	8.03349e-12		-15.5	2.14697	4.51684e-13
-15.6	2.0381	5.21396e-12		-15.5	2.16613	2.86535e-13
-15.6	2.05714	3.37019e-12		-15.5	2.1853	1.81051e-13
-15.6	2.07619	2.16948e-12		-15.5	2.20447	1.13951e-13
-15.6	2.09524	1.39081e-12		-15.5	2.22364	7.14387e-14
-15.6	2.11429	8.87962e-13		-15.5	2.24281	4.46135e-14
-15.6	2.13333	5.64603e-13		-15.5	2.26198	2.77541e-14
-15.6	2.15238	3.57542e-13		-15.5	2.28115	1.72002e-14
-15.6	2.17143	2.25508e-13		-15.5	2.30032	1.06193e-14
-15.6	2.19048	1.41666e-13		-15.5	2.31949	6.53185e-15
-15.6	2.20952	8.86468e-14		-15.5	2.33866	4.00281e-15
-15.6	2.22857	5.52559e-14		-15.5	2.35783	2.444e-15
-15.6	2.24762	3.43114e-14		-15.5	2.377	1.48683e-15
-15.6	2.26667	2.12263e-14		-15.5	2.39617	9.01285e-16
-15.6	2.28571	1.30832e-14		-15.5	2.41534	5.44403e-16
-15.6	2.30476	8.03507e-15		-15.5	2.43451	3.27682e-16
-15.6	2.32381	4.9174e-15		-15.5	2.45367	1.96552e-16
-15.6	2.34286	2.99904e-15		-15.5	2.47284	1.17492e-16
-15.6	2.36191	1.82291e-15		-15.5	2.49201	6.99948e-17
-15.6	2.38095	1.10437e-15		-15.5	2.51118	4.15589e-17
-15.6	2.4	6.66908e-16		-15.5	2.53035	2.45935e-17
-15.6	2.41905	4.01464e-16		-15.5	2.54952	1.4506e-17
-15.6	2.4381	2.40927e-16		-15.5	2.56869	8.52836e-18
-15.6	2.45714	1.44149e-16		-15.5	2.58786	4.99787e-18
-15.6	2.47619	8.59907e-17		-15.5	2.60703	2.91959e-18
-15.6	2.49524	5.11475e-17		-15.5	2.6262	1.70016e-18
-15.6	2.51429	3.03354e-17		-15.5	2.64537	9.8696e-19
-15.6	2.53333	1.7941e-17		-15.5	2.66454	5.71169e-19
-15.6	2.55238	1.05809e-17		-15.5	2.68371	3.29531e-19
-15.6	2.57143	6.2229e-18		-15.5	2.70288	1.89541e-19
-15.6	2.59048	3.64973e-18		-15.5	2.72205	1.08692e-19
-15.6	2.60952	2.13466e-18		-15.5	2.74121	6.2142e-20
-15.6	2.62857	1.24507e-18		-15.5	2.76038	3.54221e-20
-15.6	2.64762	7.242e-19		-15.5	2.77955	2.01312e-20
-15.6	2.66667	4.20059e-19		-15.5	2.79872	1.14072e-20
-15.6	2.68571	2.42965e-19		-15.5	2.81789	6.44478e-21
-15.6	2.70476	1.40134e-19		-15.5	2.83706	3.63042e-21
-15.6	2.72381	8.05936e-20		-15.5	2.85623	2.03906e-21
-15.6	2.74286	4.62166e-20		-15.5	2.8754	1.1419e-21
-15.6	2.76191	2.64253e-20		-15.5	2.89457	6.37605e-22
-15.6	2.78095	1.50644e-20		-15.5	2.91374	3.54978e-22
-15.6	2.8	8.56197e-21		-15.5	2.93291	1.9705e-22
-15.6	2.81905	4.85144e-21		-15.5	2.95208	1.09062e-22
-15.6	2.8381	2.74046e-21		-15.5	2.97125	6.01856e-23
-15.6	2.85714	1.54319e-21		-15.5	2.99042	3.31154e-23
-15.6	2.87619	8.66237e-22		-15.5	3.00959	1.81669e-23
-15.6	2.89524	4.8469e-22		-15.5	3.02875	9.93672e-24
-15.6	2.91429	2.70324e-22		-15.5	3.04792	5.4189e-24
-15.6	2.93333	1.50275e-22		-15.5	3.06709	2.94632e-24
-15.6	2.95238	8.32636e-23		-15.5	3.08626	1.59715e-24
-15.6	2.97143	4.59812e-23		-15.5	3.10543	8.63181e-25
-15.6	2.99048	2.53076e-23		-15.5	3.1246	4.65097e-25
-15.6	3.00952	1.38821e-23		-15.5	3.14377	2.49842e-25
-15.6	3.02857	7.58908e-24		-15.5	3.16294	1.33801e-25
-15.6	3.04762	4.13468e-24		-15.5	3.18211	7.14371e-26
-15.6	3.06667	2.24495e-24		-15.5	3.20128	3.80233e-26
-15.6	3.08571	1.21473e-24		-15.5	3.22045	2.01759e-26
-15.6	3.10476	6.55024e-25		-15.5	3.23962	1.06725e-26
-15.6	3.12381	3.51992e-25		-15.5	3.25879	5.62788e-27
-15.6	3.14286	1.88497e-25		-15.5	3.27796	2.95844e-27
-15.6	3.16191	1.00594e-25		-15.5	3.29713	1.5503e-27
-15.6	3.18095	5.34971e-26		-15.5	3.31629	8.0984e-28
-15.6	3.2	2.83518e-26		-15.5	3.33546	4.21702e-28
-15.6	3.21905	1.49734e-26		-15.5	3.35463	2.18893e-28
-15.6	3.2381	7.8805e-27		-15.5	3.3738	1.13259e-28
-15.6	3.25714	4.13312e-27		-15.5	3.39297	5.84147e-29
-15.6	3.27619	2.16021e-27		-15.5	3.41214	3.00315e-29
-15.6	3.29524	1.12514e-27		-15.5	3.43131	1.53899e-29
-15.6	3.31429	5.84005e-28		-15.5	3.45048	7.8612e-30
-15.6	3.33333	3.02081e-28		-15.5	3.46965	4.00255e-30
-15.6	3.35238	1.55715e-28		-15.5	3.48882	2.0313e-30
-15.6	3.37143	7.99911e-29		-15.5	3.50799	1.02754e-30
-15.6	3.39048	4.09505e-29		-15.5	3.52716	5.18087e-31
-15.6	3.40952	2.08923e-29		-15.5	3.54633	2.60368e-31
-15.6	3.42857	1.06224e-29		-15.5	3.5655	1.30422e-31
-15.6	3.44762	5.38243e-30		-15.5	3.58467	6.51155e-32
-15.6	3.46667	2.71801e-30		-15.5	3.60383	3.24033e-32
-15.6	3.48571	1.36787e-30		-15.5	3.623	1.60717e-32
-15.6	3.50476	6.86066e-31		-15.5	3.64217	7.94513e-33
-15.6	3.52381	3.42938e-31		-15.5	3.66134	3.91473e-33
-15.6	3.54286	1.70843e-31		-15.5	3.68051	1.92249e-33
-15.6	3.56191	8.48231e-32		-15.5	3.69968	9.40984e-34
-15.6	3.58095	4.19731e-32		-15.5	3.71885	4.59047e-34
-15.6	3.6	2.07e-32		-15.5	3.73802	2.23196e-34
-15.6	3.61905	1.01746e-32		-15.5	3.75719	1.0816e-34
-15.6	3.6381	4.98436e-33		-15.5	3.77636	5.22392e-35
-15.6	3.65714	2.43364e-33		-15.5	3.79553	2.51463e-35
-15.6	3.67619	1.18429e-33		-15.5	3.8147	1.20642e-35
-15.6	3.69524	5.74405e-34		-15.5	3.83387	5.76855e-36
-15.6	3.71429	2.77677e-34		-15.5	3.85304	2.74902e-36
-15.6	3.73333	1.33791e-34		-15.5	3.8722	1.30566e-36
-15.6	3.75238	6.42508e-35		-15.5	3.89137	6.18045e-37
-15.6	3.77143	3.07539e-35		-15.5	3.91054	2.91574e-37
-15.6	3.79048	1.46722e-35		-15.5	3.92971	1.37093e-37
-15.6	3.80952	6.97691e-36		-15.5	3.94888	6.42412e-38
-15.6	3.82857	3.3068e-36		-15.5	3.96805	3.00018e-38
-15.6	3.84762	1.56218e-36		-15.5	3.98722	1.39641e-38
-15.6	3.86667	7.35587e-37		-15.5	4.00639	6.47752e-39
-15.6	3.88571	3.45239e-37		-15.5	4.02556	2.99457e-39
-15.6	3.90476	1.61506e-37		-15.5	4.04473	1.37971e-39
-15.6	3.92381	7.53085e-38		-15.5	4.0639	6.33533e-40
-15.6	3.94286	3.50014e-38		-15.5	4.08307	2.89918e-40
-15.6	3.96191	1.62149e-38		-15.5	4.10224	1.32223e-40
-15.6	3.98095	7.48743e-39		-15.5	4.12141	6.00981e-41
-15.6	4	3.4462e-39		-15.5	4.14058	2.72231e-41
-15.6	4.01905	1.58103e-39		-15.5	4.15974	1.22895e-41
-15.6	4.0381	7.22985e-40		-15.5	4.17891	5.52909e-42
-15.6	4.05714	3.29542e-40		-15.5	4.19808	2.47908e-42
-15.6	4.07619	1.49721e-40		-15.5	4.21725	1.10776e-42
-15.6	4.09524	6.78031e-41		-15.5	4.23642	4.93307e-43
-15.6	4.11429	3.06061e-41		-15.5	4.25559	2.1893e-43
-15.6	4.13333	1.37708e-41		-15.5	4.27476	9.68297e-44
-15.6	4.15238	6.17591e-42		-15.5	4.29393	4.26802e-44
-15.6	4.17143	2.7608e-42		-15.5	4.3131	1.87481e-44
-15.6	4.19048	1.23016e-42		-15.5	4.33227	8.20728e-45
-15.6	4.20952	5.46358e-43		-15.5	4.35144	3.58058e-45
-15.6	4.22857	2.41871e-43		-15.5	4.37061	1.55675e-45
-15.6	4.24762	1.06728e-43		-15.5	4.38978	6.74518e-46
-15.6	4.26667	4.69423e-44		-15.5	4.40895	2.91258e-46
-15.6	4.28571	2.05796e-44		-15.5	4.42812	1.25334e-46
-15.6	4.30476	8.99282e-45		-15.5	4.44728	5.37488e-47
-15.6	4.32381	3.91688e-45		-15.5	4.46645	2.29707e-47
-15.6	4.34286	1.70047e-45		-15.5	4.48562	9.78333e-48
-15.6	4.36191	7.35834e-46		-15.5	4.50479	4.15245e-48
-15.6	4.38095	3.17375e-46		-15.5	4.52396	1.75641e-48
-15.6	4.4	1.36441e-46		-15.5	4.54313	7.40375e-49
-15.6	4.41905	5.84653e-47		-15.5	4.5623	3.11014e-49
-15.6	4.4381	2.49705e-47		-15.5	4.58147	1.302e-49
-15.6	4.45714	1.063e-47		-15.5	4.60064	5.43182e-50
-15.6	4.47619	4.51035e-48		-15.5	4.61981	2.25829e-50
-15.6	4.49524	1.90748e-48		-15.5	4.63898	9.35655e-51
-15.6	4.51429	8.04048e-49		-15.5	4.65815	3.86324e-51
-15.6	4.53333	3.37809e-49		-15.5	4.67732	1.5896e-51
-15.6	4.55238	1.41458e-49		-15.5	4.69649	6.51811e-52
-15.6	4.57143	5.90406e-50		-15.5	4.71566	2.66351e-52
-15.6	4.59048	2.45605e-50		-15.5	4.73482	1.08464e-52
-15.6	4.60952	1.01832e-50		-15.5	4.75399	4.40165e-53
-15.6	4.62857	4.20815e-51		-15.5	4.77316	1.78009e-53
-15.6	4.64762	1.73323e-51		-15.5	4.79233	7.17406e-54
-15.6	4.66667	7.11503e-52		-15.5	4.8115	2.88127e-54
-15.6	4.68571	2.91107e-52		-15.5	4.83067	1.15319e-54
-15.6	4.70476	1.18708e-52		-15.5	4.84984	4.5995e-55
-15.6	4.72381	4.82457e-53		-15.5	4.86901	1.82817e-55
-15.6	4.74286	1.95428e-53		-15.5	4.88818	7.24131e-56
-15.6	4.76191	7.88971e-54		-15.5	4.90735	2.85833e-56
-15.6	4.78095	3.17454e-54		-15.5	4.92652	1.12435e-56
-15.6	4.8	1.27305e-54		-15.5	4.94569	4.40742e-57
-15.6	4.81905	5.08803e-55		-15.5	4.96486	1.72172e-57
-15.6	4.8381	2.02672e-55		-15.5	4.98403	6.70241e-58
-15.6	4.85714	8.04597e-56		-15.5	5.0032	2.60012e-58
-15.6	4.87619	3.18345e-56		-15.5	5.02236	1.00519e-58
-15.6	4.89524	1.25532e-56		-15.5	5.04153	3.87254e-59
-15.6	4.91429	4.93336e-57		-15.5	5.0607	1.48674e-59
-15.6	4.93333	1.93225e-57		-15.5	5.07987	5.68811e-60
-15.6	4.95238	7.54249e-58		-15.5	5.09904	2.16866e-60
-15.6	4.97143	2.93423e-58		-15.5	5.11821	8.2396e-61
-15.6	4.99048	1.13763e-58		-15.5	5.13738	3.11969e-61
-15.6	5.00952	4.39576e-59		-15.5	5.15655	1.17709e-61
-15.6	5.02857	1.69274e-59		-15.5	5.17572	4.42586e-62
-15.6	5.04762	6.49638e-60		-15.5	5.19489	1.65835e-62
-15.6	5.06667	2.4847e-60		-15.5	5.21406	6.19222e-63
-15.6	5.08571	9.47098e-61		-15.5	5.23323	2.30413e-63
-15.6	5.10476	3.59779e-61		-15.5	5.2524	8.54391e-64
-15.6	5.12381	1.36205e-61		-15.5	5.27157	3.15717e-64
-15.6	5.14286	5.13889e-62		-15.5	5.29074	1.1626e-64
-15.6	5.16191	1.93223e-62		-15.5	5.3099	4.26628e-65
-15.6	5.18095	7.24041e-63		-15.5	5.32907	1.56013e-65
-15.6	5.2	2.70383e-63		-15.5	5.34824	5.68541e-66
-15.6	5.21905	1.00626e-63		-15.5	5.36741	2.06468e-66
-15.6	5.2381	3.73205e-64		-15.5	5.38658	7.47194e-67
-15.6	5.25714	1.37942e-64		-15.5	5.40575	2.69466e-67
-15.6	5.27619	5.08105e-65		-15.5	5.42492	9.6842e-68
-15.6	5.29524	1.86517e-65		-15.5	5.44409	3.46828e-68
-15.6	5.31429	6.82322e-66		-15.5	5.46326	1.23781e-68
-15.6	5.33333	2.48752e-66		-15.5	5.48243	4.40232e-69
-15.6	5.35238	9.03748e-67		-15.5	5.5016	1.56027e-69
-15.6	5.37143	3.27215e-67		-15.5	5.52077	5.51072e-70
-15.6	5.39048	1.18065e-67		-15.5	5.53994	1.93957e-70
-15.6	5.40952	4.24533e-68		-15.5	5.55911	6.80289e-71
-15.6	5.42857	1.52126e-68		-15.5	5.57828	2.37777e-71
-15.6	5.44762	5.43245e-69		-15.5	5.59744	8.28202e-72
-15.6	5.46667	1.93325e-69		-15.5	5.61661	2.8747e-72
-15.6	5.48571	6.85613e-70		-15.5	5.63578	9.94347e-73
-15.6	5.50476	2.42309e-70		-15.5	5.65495	3.42747e-73
-15.6	5.52381	8.53406e-71		-15.5	5.67412	1.17733e-73
-15.6	5.54286	2.9953e-71		-15.5	5.69329	4.03007e-74
-15.6	5.56191	1.04766e-71		-15.5	5.71246	1.37473e-74
-15.6	5.58095	3.65172e-72		-15.5	5.73163	4.67317e-75
-15.6	5.6	1.26844e-72		-15.5	5.7508	1.58305e-75
-15.6	5.61905	4.39071e-73		-15.5	5.76997	5.34403e-76
-15.6	5.6381	1.51459e-73		-15.5	5.78914	1.79777e-76
-15.6	5.65714	5.20653e-74		-15.5	5.80831	6.0268e-77
-15.6	5.67619	1.78359e-74		-15.5	5.82748	2.0134e-77
-15.6	5.69524	6.08883e-75		-15.5	5.84665	6.70293e-78
-15.6	5.71429	2.0714e-75		-15.5	5.86582	2.22377e-78
-15.6	5.73333	7.02243e-76		-15.5	5.88498	7.35196e-79
-15.6	5.75238	2.37247e-76		-15.5	5.90415	2.42219e-79
-15.6	5.77143	7.9874e-77		-15.5	5.92332	7.95249e-80
-15.6	5.79048	2.67979e-77		-15.5	5.94249	2.60189e-80
-15.6	5.80952	8.95952e-78		-15.5	5.96166	8.4833e-81
-15.6	5.82857	2.9851e-78		-15.5	5.98083	2.75633e-81
-15.6	5.84762	9.91109e-79		-15.5	6	8.9246e-82
-15.6	5.86667	3.27924e-79		-15.45	0	0.0009801
-15.6	5.88571	1.08122e-79		-15.45	0.01917	0.00201
-15.6	5.90476	3.55256e-80		-15.45	0.03834	0.0032
-15.6	5.92381	1.16321e-80		-15.45	0.05751	0.00446
-15.6	5.94286	3.79543e-81		-15.45	0.07668	0.00575
-15.6	5.96191	1.2341e-81		-15.45	0.09585	0.00695
-15.6	5.98095	3.9988e-82		-15.45	0.11502	0.00793
-15.6	6	1.2912e-82		-15.45	0.13419	0.00858
-15.55	0	0.00658		-15.45	0.15336	0.00881
-15.55	0.01905	0.01272		-15.45	0.17252	0.00859
-15.55	0.0381	0.01745		-15.45	0.19169	0.00793
-15.55	0.05714	0.02035		-15.45	0.21086	0.00688
-15.55	0.07619	0.02196		-15.45	0.23003	0.00552
-15.55	0.09524	0.0226		-15.45	0.2492	0.00398
-15.55	0.11429	0.02254		-15.45	0.26837	0.0024
-15.55	0.13333	0.02211		-15.45	0.28754	0.000980644
-15.55	0.15238	0.02164		-15.45	0.30671	0.000603944
-15.55	0.17143	0.02148		-15.45	0.32588	0.0014
-15.55	0.19048	0.02181		-15.45	0.34505	0.00191
-15.55	0.20952	0.02268		-15.45	0.36422	0.002
-15.55	0.22857	0.02394		-15.45	0.38339	0.0017
-15.55	0.24762	0.02535		-15.45	0.40256	0.00108
-15.55	0.26667	0.02668		-15.45	0.42173	0.000620428
-15.55	0.28571	0.02773		-15.45	0.4409	0.00143
-15.55	0.30476	0.02838		-15.45	0.46006	0.00265
-15.55	0.32381	0.02857		-15.45	0.47923	0.00391
-15.55	0.34286	0.0283		-15.45	0.4984	0.00511
-15.55	0.36191	0.0276		-15.45	0.51757	0.00616
-15.55	0.38095	0.02656		-15.45	0.53674	0.00701
-15.55	0.4	0.02524		-15.45	0.55591	0.00765
-15.55	0.41905	0.02376		-15.45	0.57508	0.00805
-15.55	0.4381	0.02219		-15.45	0.59425	0.00823
-15.55	0.45714	0.02063		-15.45	0.61342	0.00822
-15.55	0.47619	0.01911		-15.45	0.63259	0.00804
-15.55	0.49524	0.01769		-15.45	0.65176	0.00773
-15.55	0.51429	0.01637		-15.45	0.67093	0.00731
-15.55	0.53333	0.01516		-15.45	0.6901	0.00683
-15.55	0.55238	0.01403		-15.45	0.70927	0.00629
-15.55	0.57143	0.01298		-15.45	0.72844	0.00574
-15.55	0.59048	0.01199		-15.45	0.7476	0.00518
-15.55	0.60952	0.01105		-15.45	0.76677	0.00463
-15.55	0.62857	0.01015		-15.45	0.78594	0.0041
-15.55	0.64762	0.00929		-15.45	0.80511	0.0036
-15.55	0.66667	0.00847		-15.45	0.82428	0.00314
-15.55	0.68571	0.0077		-15.45	0.84345	0.00271
-15.55	0.70476	0.00697		-15.45	0.86262	0.00232
-15.55	0.72381	0.00629		-15.45	0.88179	0.00197
-15.55	0.74286	0.00565		-15.45	0.90096	0.00167
-15.55	0.76191	0.00506		-15.45	0.92013	0.00139
-15.55	0.78095	0.00452		-15.45	0.9393	0.00116
-15.55	0.8	0.00402		-15.45	0.95847	0.000955923
-15.55	0.81905	0.00356		-15.45	0.97764	0.000783046
-15.55	0.8381	0.00313		-15.45	0.99681	0.000636945
-15.55	0.85714	0.00274		-15.45	1.01597	0.000514521
-15.55	0.87619	0.00239		-15.45	1.03514	0.000412782
-15.55	0.89524	0.00206		-15.45	1.05431	0.000328911
-15.55	0.91429	0.00177		-15.45	1.07348	0.000260312
-15.55	0.93333	0.00151		-15.45	1.09265	0.000204637
-15.55	0.95238	0.00127		-15.45	1.11182	0.000159795
-15.55	0.97143	0.00107		-15.45	1.13099	0.000123951
-15.55	0.99048	0.000887013		-15.45	1.15016	9.55149e-05
-15.55	1.00952	0.000731391		-15.45	1.16933	7.31223e-05
-15.55	1.02857	0.000598093		-15.45	1.1885	5.56189e-05
-15.55	1.04762	0.000485056		-15.45	1.20767	4.20369e-05
-15.55	1.06667	0.000390154		-15.45	1.22684	3.15737e-05
-15.55	1.08571	0.000311266		-15.45	1.24601	2.35702e-05
-15.55	1.10476	0.00024633		-15.45	1.26518	1.74909e-05
-15.55	1.12381	0.000193392		-15.45	1.28435	1.29046e-05
-15.55	1.14286	0.000150643		-15.45	1.30351	9.46773e-06
-15.55	1.16191	0.00011644		-15.45	1.32268	6.90886e-06
-15.55	1.18095	8.93229e-05		-15.45	1.34185	5.01563e-06
-15.55	1.2	6.80129e-05		-15.45	1.36102	3.62333e-06
-15.55	1.21905	5.14109e-05		-15.45	1.38019	2.60537e-06
-15.55	1.2381	3.85853e-05		-15.45	1.39936	1.86522e-06
-15.55	1.25714	2.87583e-05		-15.45	1.41853	1.32989e-06
-15.55	1.27619	2.12889e-05		-15.45	1.4377	9.44626e-07
-15.55	1.29524	1.56555e-05		-15.45	1.45687	6.68643e-07
-15.55	1.31429	1.14389e-05		-15.45	1.47604	4.71798e-07
-15.55	1.33333	8.30595e-06		-15.45	1.49521	3.31956e-07
-15.55	1.35238	5.99473e-06		-15.45	1.51438	2.32967e-07
-15.55	1.37143	4.30148e-06		-15.45	1.53355	1.63126e-07
-15.55	1.39048	3.06926e-06		-15.45	1.55272	1.13992e-07
-15.55	1.40952	2.17832e-06		-15.45	1.57189	7.95134e-08
-15.55	1.42857	1.53815e-06		-15.45	1.59105	5.53732e-08
-15.55	1.44762	1.0809e-06		-15.45	1.61022	3.85038e-08
-15.55	1.46667	7.56161e-07		-15.45	1.62939	2.67352e-08
-15.55	1.48571	5.26781e-07		-15.45	1.64856	1.85372e-08
-15.55	1.50476	3.65582e-07		-15.45	1.66773	1.28342e-08
-15.55	1.52381	2.52836e-07		-15.45	1.6869	8.872e-09
-15.55	1.54286	1.74325e-07		-15.45	1.70607	6.12272e-09
-15.55	1.56191	1.19873e-07		-15.45	1.72524	4.21764e-09
-15.55	1.58095	8.22415e-08		-15.45	1.74441	2.89944e-09
-15.55	1.6	5.63166e-08		-15.45	1.76358	1.98882e-09
-15.55	1.61905	3.85044e-08		-15.45	1.78275	1.36089e-09
-15.55	1.6381	2.62933e-08		-15.45	1.80192	9.28767e-10
-15.55	1.65714	1.79369e-08		-15.45	1.82109	6.32069e-10
-15.55	1.67619	1.22262e-08		-15.45	1.84026	4.28859e-10
-15.55	1.69524	8.32762e-09		-15.45	1.85943	2.90057e-10
-15.55	1.71429	5.6681e-09		-15.45	1.87859	1.95527e-10
-15.55	1.73333	3.85486e-09		-15.45	1.89776	1.31348e-10
-15.55	1.75238	2.61921e-09		-15.45	1.91693	8.79194e-11
-15.55	1.77143	1.77759e-09		-15.45	1.9361	5.86335e-11
-15.55	1.79048	1.2047e-09		-15.45	1.95527	3.89557e-11
-15.55	1.80952	8.15064e-10		-15.45	1.97444	2.57828e-11
-15.55	1.82857	5.50348e-10		-15.45	1.99361	1.69981e-11
-15.55	1.84762	3.70754e-10		-15.45	2.01278	1.11625e-11
-15.55	1.86667	2.49122e-10		-15.45	2.03195	7.30136e-12
-15.55	1.88571	1.66916e-10		-15.45	2.05112	4.75679e-12
-15.55	1.90476	1.11491e-10		-15.45	2.07029	3.08665e-12
-15.55	1.92381	7.42238e-11		-15.45	2.08946	1.99491e-12
-15.55	1.94286	4.92407e-11		-15.45	2.10863	1.28417e-12
-15.55	1.96191	3.25475e-11		-15.45	2.1278	8.23354e-13
-15.55	1.98095	2.14321e-11		-15.45	2.14697	5.25802e-13
-15.55	2	1.40579e-11		-15.45	2.16613	3.34455e-13
-15.55	2.01905	9.1844e-12		-15.45	2.1853	2.11904e-13
-15.55	2.0381	5.97627e-12		-15.45	2.20447	1.33734e-13
-15.55	2.05714	3.87295e-12		-15.45	2.22364	8.40721e-14
-15.55	2.07619	2.49962e-12		-15.45	2.24281	5.26485e-14
-15.55	2.09524	1.60667e-12		-15.45	2.26198	3.2844e-14
-15.55	2.11429	1.02849e-12		-15.45	2.28115	2.04117e-14
-15.55	2.13333	6.55692e-13		-15.45	2.30032	1.26376e-14
-15.55	2.15238	4.16334e-13		-15.45	2.31949	7.79534e-15
-15.55	2.17143	2.63293e-13		-15.45	2.33866	4.79074e-15
-15.55	2.19048	1.65849e-13		-15.45	2.35783	2.93348e-15
-15.55	2.20952	1.0406e-13		-15.45	2.377	1.78976e-15
-15.55	2.22857	6.504e-14		-15.45	2.39617	1.08807e-15
-15.55	2.24762	4.04972e-14		-15.45	2.41534	6.59143e-16
-15.55	2.26667	2.51217e-14		-15.45	2.43451	3.9791e-16
-15.55	2.28571	1.55268e-14		-15.45	2.45367	2.39381e-16
-15.55	2.30476	9.56222e-15		-15.45	2.47284	1.43519e-16
-15.55	2.32381	5.86824e-15		-15.45	2.49201	8.57553e-17
-15.55	2.34286	3.58892e-15		-15.45	2.51118	5.10695e-17
-15.55	2.36191	2.18756e-15		-15.45	2.53035	3.03128e-17
-15.55	2.38095	1.32901e-15		-15.45	2.54952	1.79338e-17
-15.55	2.4	8.04831e-16		-15.45	2.56869	1.05758e-17
-15.55	2.41905	4.85865e-16		-15.45	2.58786	6.21675e-18
-15.55	2.4381	2.9241e-16		-15.45	2.60703	3.64283e-18
-15.55	2.45714	1.75454e-16		-15.45	2.6262	2.12791e-18
-15.55	2.47619	1.04967e-16		-15.45	2.64537	1.23913e-18
-15.55	2.49524	6.26157e-17		-15.45	2.66454	7.1936e-19
-15.55	2.51429	3.72456e-17		-15.45	2.68371	4.1634e-19
-15.55	2.53333	2.20926e-17		-15.45	2.70288	2.40234e-19
-15.55	2.55238	1.3068e-17		-15.45	2.72205	1.38202e-19
-15.55	2.57143	7.70856e-18		-15.45	2.74121	7.92682e-20
-15.55	2.59048	4.53467e-18		-15.45	2.76038	4.53307e-20
-15.55	2.60952	2.66029e-18		-15.45	2.77955	2.58466e-20
-15.55	2.62857	1.55641e-18		-15.45	2.79872	1.46938e-20
-15.55	2.64762	9.08085e-19		-15.45	2.81789	8.32903e-21
-15.55	2.66667	5.2836e-19		-15.45	2.83706	4.70743e-21
-15.55	2.68571	3.06568e-19		-15.45	2.85623	2.65282e-21
-15.55	2.70476	1.7738e-19		-15.45	2.8754	1.49061e-21
-15.55	2.72381	1.02341e-19		-15.45	2.89457	8.3514e-22
-15.55	2.74286	5.88775e-20		-15.45	2.91374	4.6654e-22
-15.55	2.76191	3.37744e-20		-15.45	2.93291	2.59868e-22
-15.55	2.78095	1.93173e-20		-15.45	2.95208	1.44328e-22
-15.55	2.8	1.10157e-20		-15.45	2.97125	7.99245e-23
-15.55	2.81905	6.26269e-21		-15.45	2.99042	4.41303e-23
-15.55	2.8381	3.54962e-21		-15.45	3.00959	2.42951e-23
-15.55	2.85714	2.00565e-21		-15.45	3.02875	1.33359e-23
-15.55	2.87619	1.12971e-21		-15.45	3.04792	7.29864e-24
-15.55	2.89524	6.34302e-22		-15.45	3.06709	3.98266e-24
-15.55	2.91429	3.55004e-22		-15.45	3.08626	2.16676e-24
-15.55	2.93333	1.98044e-22		-15.45	3.10543	1.1753e-24
-15.55	2.95238	1.10121e-22		-15.45	3.1246	6.35603e-25
-15.55	2.97143	6.10302e-23		-15.45	3.14377	3.42698e-25
-15.55	2.99048	3.37113e-23		-15.45	3.16294	1.84214e-25
-15.55	3.00952	1.8559e-23		-15.45	3.18211	9.87213e-26
-15.55	3.02857	1.01828e-23		-15.45	3.20128	5.2744e-26
-15.55	3.04762	5.5682e-24		-15.45	3.22045	2.80933e-26
-15.55	3.06667	3.03448e-24		-15.45	3.23962	1.49174e-26
-15.55	3.08571	1.64805e-24		-15.45	3.25879	7.89658e-27
-15.55	3.10476	8.92012e-25		-15.45	3.27796	4.16712e-27
-15.55	3.12381	4.81149e-25		-15.45	3.29713	2.19219e-27
-15.55	3.14286	2.58639e-25		-15.45	3.31629	1.14963e-27
-15.55	3.16191	1.38552e-25		-15.45	3.33546	6.01001e-28
-15.55	3.18095	7.39661e-26		-15.45	3.35463	3.13199e-28
-15.55	3.2	3.93508e-26		-15.45	3.3738	1.62701e-28
-15.55	3.21905	2.08629e-26		-15.45	3.39297	8.42522e-29
-15.55	3.2381	1.10229e-26		-15.45	3.41214	4.34898e-29
-15.55	3.25714	5.80388e-27		-15.45	3.43131	2.23772e-29
-15.55	3.27619	3.04539e-27		-15.45	3.45048	1.14771e-29
-15.55	3.29524	1.59247e-27		-15.45	3.46965	5.86758e-30
-15.55	3.31429	8.29859e-28		-15.45	3.48882	2.99011e-30
-15.55	3.33333	4.30968e-28		-15.45	3.50799	1.51884e-30
-15.55	3.35238	2.23046e-28		-15.45	3.52716	7.69006e-31
-15.55	3.37143	1.15042e-28		-15.45	3.54633	3.88094e-31
-15.55	3.39048	5.91335e-29		-15.45	3.5655	1.95223e-31
-15.55	3.40952	3.0292e-29		-15.45	3.58467	9.7883e-32
-15.55	3.42857	1.54648e-29		-15.45	3.60383	4.89175e-32
-15.55	3.44762	7.86835e-30		-15.45	3.623	2.43669e-32
-15.55	3.46667	3.9898e-30		-15.45	3.64217	1.20979e-32
-15.55	3.48571	2.01627e-30		-15.45	3.66134	5.98678e-33
-15.55	3.50476	1.0155e-30		-15.45	3.68051	2.95289e-33
-15.55	3.52381	5.09742e-31		-15.45	3.69968	1.45167e-33
-15.55	3.54286	2.55012e-31		-15.45	3.71885	7.11304e-34
-15.55	3.56191	1.2715e-31		-15.45	3.73802	3.47381e-34
-15.55	3.58095	6.31858e-32		-15.45	3.75719	1.6909e-34
-15.55	3.6	3.12949e-32		-15.45	3.77636	8.20335e-35
-15.55	3.61905	1.54484e-32		-15.45	3.79553	3.96663e-35
-15.55	3.6381	7.60064e-33		-15.45	3.8147	1.91165e-35
-15.55	3.65714	3.72716e-33		-15.45	3.83387	9.18222e-36
-15.55	3.67619	1.82167e-33		-15.45	3.85304	4.39583e-36
-15.55	3.69524	8.87421e-34		-15.45	3.8722	2.09742e-36
-15.55	3.71429	4.30883e-34		-15.45	3.89137	9.9742e-37
-15.55	3.73333	2.08527e-34		-15.45	3.91054	4.72737e-37
-15.55	3.75238	1.00587e-34		-15.45	3.92971	2.23309e-37
-15.55	3.77143	4.83613e-35		-15.45	3.94888	1.05133e-37
-15.55	3.79048	2.31758e-35		-15.45	3.96805	4.93304e-38
-15.55	3.80952	1.10702e-35		-15.45	3.98722	2.30692e-38
-15.55	3.82857	5.27064e-36		-15.45	4.00639	1.0752e-38
-15.55	3.84762	2.50125e-36		-15.45	4.02556	4.99447e-39
-15.55	3.86667	1.18315e-36		-15.45	4.04473	2.3122e-39
-15.55	3.88571	5.57848e-37		-15.45	4.0639	1.06684e-39
-15.55	3.90476	2.6217e-37		-15.45	4.08307	4.90577e-40
-15.55	3.92381	1.22814e-37		-15.45	4.10224	2.24828e-40
-15.55	3.94286	5.73462e-38		-15.45	4.12141	1.0269e-40
-15.55	3.96191	2.66907e-38		-15.45	4.14058	4.67452e-41
-15.55	3.98095	1.23827e-38		-15.45	4.15974	2.12069e-41
-15.55	4	5.72622e-39		-15.45	4.17891	9.58843e-42
-15.55	4.01905	2.6395e-39		-15.45	4.19808	4.32063e-42
-15.55	4.0381	1.21276e-39		-15.45	4.21725	1.94033e-42
-15.55	4.05714	5.55432e-40		-15.45	4.23642	8.68419e-43
-15.55	4.07619	2.53564e-40		-15.45	4.25559	3.87356e-43
-15.55	4.09524	1.15384e-40		-15.45	4.27476	1.72193e-43
-15.55	4.11429	5.23369e-41		-15.45	4.29393	7.62862e-44
-15.55	4.13333	2.3663e-41		-15.45	4.3131	3.36821e-44
-15.55	4.15238	1.06644e-41		-15.45	4.33227	1.48209e-44
-15.55	4.17143	4.79073e-42		-15.45	4.35144	6.49938e-45
-15.55	4.19048	2.14521e-42		-15.45	4.37061	2.84047e-45
-15.55	4.20952	9.57497e-43		-15.45	4.38978	1.23716e-45
-15.55	4.22857	4.25996e-43		-15.45	4.40895	5.37012e-46
-15.55	4.24762	1.88918e-43		-15.45	4.42812	2.32305e-46
-15.55	4.26667	8.35102e-44		-15.45	4.44728	1.0015e-46
-15.55	4.28571	3.67962e-44		-15.45	4.46645	4.30288e-47
-15.55	4.30476	1.61608e-44		-15.45	4.48562	1.8424e-47
-15.55	4.32381	7.07488e-45		-15.45	4.50479	7.86184e-48
-15.55	4.34286	3.08723e-45		-15.45	4.52396	3.34333e-48
-15.55	4.36191	1.3428e-45		-15.45	4.54313	1.41693e-48
-15.55	4.38095	5.82166e-46		-15.45	4.5623	5.98452e-49
-15.55	4.4	2.51578e-46		-15.45	4.58147	2.51897e-49
-15.55	4.41905	1.08364e-46		-15.45	4.60064	1.05665e-49
-15.55	4.4381	4.65251e-47		-15.45	4.61981	4.4172e-50
-15.55	4.45714	1.99101e-47		-15.45	4.63898	1.84025e-50
-15.55	4.47619	8.49267e-48		-15.45	4.65815	7.64037e-51
-15.55	4.49524	3.61075e-48		-15.45	4.67732	3.16128e-51
-15.55	4.51429	1.53014e-48		-15.45	4.69649	1.30353e-51
-15.55	4.53333	6.46315e-49		-15.45	4.71566	5.35656e-52
-15.55	4.55238	2.72104e-49		-15.45	4.73482	2.19361e-52
-15.55	4.57143	1.14183e-49		-15.45	4.75399	8.95244e-53
-15.55	4.59048	4.77573e-50		-15.45	4.77316	3.64108e-53
-15.55	4.60952	1.99091e-50		-15.45	4.79233	1.4758e-53
-15.55	4.62857	8.27241e-51		-15.45	4.8115	5.96112e-54
-15.55	4.64762	3.42595e-51		-15.45	4.83067	2.39958e-54
-15.55	4.66667	1.41416e-51		-15.45	4.84984	9.62606e-55
-15.55	4.68571	5.81805e-52		-15.45	4.86901	3.84828e-55
-15.55	4.70476	2.38572e-52		-15.45	4.88818	1.53317e-55
-15.55	4.72381	9.75044e-53		-15.45	4.90735	6.08719e-56
-15.55	4.74286	3.9718e-53		-15.45	4.92652	2.40851e-56
-15.55	4.76191	1.61253e-53		-15.45	4.94569	9.49693e-57
-15.55	4.78095	6.52505e-54		-15.45	4.96486	3.73183e-57
-15.55	4.8	2.63156e-54		-15.45	4.98403	1.46138e-57
-15.55	4.81905	1.05778e-54		-15.45	5.0032	5.70305e-58
-15.55	4.8381	4.23767e-55		-15.45	5.02236	2.21796e-58
-15.55	4.85714	1.69203e-55		-15.45	5.04153	8.59613e-59
-15.55	4.87619	6.7334e-56		-15.45	5.0607	3.32012e-59
-15.55	4.89524	2.67059e-56		-15.45	5.07987	1.27793e-59
-15.55	4.91429	1.05566e-56		-15.45	5.09904	4.90187e-60
-15.55	4.93333	4.15893e-57		-15.45	5.11821	1.87377e-60
-15.55	4.95238	1.63298e-57		-15.45	5.13738	7.13796e-61
-15.55	4.97143	6.39026e-58		-15.45	5.15655	2.70977e-61
-15.55	4.99048	2.49226e-58		-15.45	5.17572	1.02516e-61
-15.55	5.00952	9.68734e-59		-15.45	5.19489	3.86501e-62
-15.55	5.02857	3.75276e-59		-15.45	5.21406	1.45215e-62
-15.55	5.04762	1.44887e-59		-15.45	5.23323	5.43715e-63
-15.55	5.06667	5.57493e-60		-15.45	5.2524	2.02876e-63
-15.55	5.08571	2.13786e-60		-15.45	5.27157	7.54384e-64
-15.55	5.10476	8.17052e-61		-15.45	5.29074	2.79546e-64
-15.55	5.12381	3.11205e-61		-15.45	5.3099	1.03232e-64
-15.55	5.14286	1.18133e-61		-15.45	5.32907	3.79905e-65
-15.55	5.16191	4.4691e-62		-15.45	5.34824	1.39327e-65
-15.55	5.18095	1.68497e-62		-15.45	5.36741	5.09207e-66
-15.55	5.2	6.33125e-63		-15.45	5.38658	1.85462e-66
-15.55	5.21905	2.37087e-63		-15.45	5.40575	6.73153e-67
-15.55	5.2381	8.84801e-64		-15.45	5.42492	2.43485e-67
-15.55	5.25714	3.29081e-64		-15.45	5.44409	8.77668e-68
-15.55	5.27619	1.21978e-64		-15.45	5.46326	3.15274e-68
-15.55	5.29524	4.50582e-65		-15.45	5.48243	1.12861e-68
-15.55	5.31429	1.65876e-65		-15.45	5.5016	4.02626e-69
-15.55	5.33333	6.08571e-66		-15.45	5.52077	1.43139e-69
-15.55	5.35238	2.22511e-66		-15.45	5.53994	5.07122e-70
-15.55	5.37143	8.10787e-67		-15.45	5.55911	1.79047e-70
-15.55	5.39048	2.94425e-67		-15.45	5.57828	6.29971e-71
-15.55	5.40952	1.0655e-67		-15.45	5.59744	2.20889e-71
-15.55	5.42857	3.84278e-68		-15.45	5.61661	7.71839e-72
-15.55	5.44762	1.38117e-68		-15.45	5.63578	2.68769e-72
-15.55	5.46667	4.94719e-69		-15.45	5.65495	9.32675e-73
-15.55	5.48571	1.76595e-69		-15.45	5.67412	3.22538e-73
-15.55	5.50476	6.28214e-70		-15.45	5.69329	1.11156e-73
-15.55	5.52381	2.22712e-70		-15.45	5.71246	3.81752e-74
-15.55	5.54286	7.86841e-71		-15.45	5.73163	1.30657e-74
-15.55	5.56191	2.77036e-71		-15.45	5.7508	4.45636e-75
-15.55	5.58095	9.72056e-72		-15.45	5.76997	1.51471e-75
-15.55	5.6	3.399e-72		-15.45	5.78914	5.13072e-76
-15.55	5.61905	1.18445e-72		-15.45	5.80831	1.73192e-76
-15.55	5.6381	4.11325e-73		-15.45	5.82748	5.82606e-77
-15.55	5.65714	1.4235e-73		-15.45	5.84665	1.95309e-77
-15.55	5.67619	4.90943e-74		-15.45	5.86582	6.52486e-78
-15.55	5.69524	1.68736e-74		-15.45	5.88498	2.1723e-78
-15.55	5.71429	5.77946e-75		-15.45	5.90415	7.20722e-79
-15.55	5.73333	1.97273e-75		-15.45	5.92332	2.38296e-79
-15.55	5.75238	6.71042e-76		-15.45	5.94249	7.85172e-80
-15.55	5.77143	2.27474e-76		-15.45	5.96166	2.57818e-80
-15.55	5.79048	7.68446e-77		-15.45	5.98083	8.43652e-81
-15.55	5.80952	2.58699e-77		-15.45	6	2.75114e-81
-15.55	5.82857	8.67913e-78		-15.4	0	0.000980101
-15.55	5.84762	2.90172e-78		-15.4	0.01917	0.00201
-15.55	5.86667	9.66796e-79		-15.4	0.03834	0.0032
-15.55	5.88571	3.21005e-79		-15.4	0.05751	0.00446
-15.55	5.90476	1.06215e-79		-15.4	0.07668	0.00575
-15.55	5.92381	3.50234e-80		-15.4	0.09585	0.00695
-15.55	5.94286	1.15087e-80		-15.4	0.11502	0.00793
-15.55	5.96191	3.76873e-81		-15.4	0.13419	0.00858
-15.55	5.98095	1.22987e-81		-15.4	0.15336	0.00882
-15.55	6	3.99961e-82		-15.4	0.17252	0.00861
-15.5	0	0.00658		-15.4	0.19169	0.00795
-15.5	0.01905	0.01272		-15.4	0.21086	0.00689
-15.5	0.0381	0.01746		-15.4	0.23003	0.00553
-15.5	0.05714	0.02035		-15.4	0.2492	0.00399
-15.5	0.07619	0.02196		-15.4	0.26837	0.00241
-15.5	0.09524	0.0226		-15.4	0.28754	0.000982779
-15.5	0.11429	0.02255		-15.4	0.30671	0.00060155
-15.5	0.13333	0.02212		-15.4	0.32588	0.0014
-15.5	0.15238	0.02166		-15.4	0.34505	0.00191
-15.5	0.17143	0.02149		-15.4	0.36422	0.00201
-15.5	0.19048	0.02184		-15.4	0.38339	0.00171
-15.5	0.20952	0.02271		-15.4	0.40256	0.00109
-15.5	0.22857	0.02398		-15.4	0.42173	0.000633173
-15.5	0.24762	0.0254		-15.4	0.4409	0.00144
-15.5	0.26667	0.02674		-15.4	0.46006	0.00267
-15.5	0.28571	0.0278		-15.4	0.47923	0.00395
-15.5	0.30476	0.02847		-15.4	0.4984	0.00516
-15.5	0.32381	0.02867		-15.4	0.51757	0.00622
-15.5	0.34286	0.02841		-15.4	0.53674	0.00709
-15.5	0.36191	0.02773		-15.4	0.55591	0.00773
-15.5	0.38095	0.02669		-15.4	0.57508	0.00815
-15.5	0.4	0.02538		-15.4	0.59425	0.00834
-15.5	0.41905	0.0239		-15.4	0.61342	0.00834
-15.5	0.4381	0.02234		-15.4	0.63259	0.00816
-15.5	0.45714	0.02077		-15.4	0.65176	0.00785
-15.5	0.47619	0.01926		-15.4	0.67093	0.00744
-15.5	0.49524	0.01783		-15.4	0.6901	0.00695
-15.5	0.51429	0.01651		-15.4	0.70927	0.00641
-15.5	0.53333	0.0153		-15.4	0.72844	0.00585
-15.5	0.55238	0.01417		-15.4	0.7476	0.00529
-15.5	0.57143	0.01312		-15.4	0.76677	0.00473
-15.5	0.59048	0.01213		-15.4	0.78594	0.0042
-15.5	0.60952	0.01118		-15.4	0.80511	0.00369
-15.5	0.62857	0.01028		-15.4	0.82428	0.00322
-15.5	0.64762	0.00942		-15.4	0.84345	0.00278
-15.5	0.66667	0.0086		-15.4	0.86262	0.00239
-15.5	0.68571	0.00782		-15.4	0.88179	0.00203
-15.5	0.70476	0.00708		-15.4	0.90096	0.00171
-15.5	0.72381	0.00639		-15.4	0.92013	0.00144
-15.5	0.74286	0.00575		-15.4	0.9393	0.0012
-15.5	0.76191	0.00516		-15.4	0.95847	0.000987844
-15.5	0.78095	0.00461		-15.4	0.97764	0.000810247
-15.5	0.8	0.0041		-15.4	0.99681	0.000659945
-15.5	0.81905	0.00364		-15.4	1.01597	0.000533822
-15.5	0.8381	0.00321		-15.4	1.03514	0.000428857
-15.5	0.85714	0.00281		-15.4	1.05431	0.000342199
-15.5	0.87619	0.00245		-15.4	1.07348	0.000271215
-15.5	0.89524	0.00212		-15.4	1.09265	0.000213517
-15.5	0.91429	0.00182		-15.4	1.11182	0.000166975
-15.5	0.93333	0.00155		-15.4	1.13099	0.000129715
-15.5	0.95238	0.00131		-15.4	1.15016	0.000100108
-15.5	0.97143	0.0011		-15.4	1.16933	7.6756e-05
-15.5	0.99048	0.000917672		-15.4	1.1885	5.84735e-05
-15.5	1.00952	0.000757755		-15.4	1.20767	4.42638e-05
-15.5	1.02857	0.000620552		-15.4	1.22684	3.32989e-05
-15.5	1.04762	0.000504012		-15.4	1.24601	2.48978e-05
-15.5	1.06667	0.000406006		-15.4	1.26518	1.85059e-05
-15.5	1.08571	0.000324402		-15.4	1.28435	1.36756e-05
-15.5	1.10476	0.000257119		-15.4	1.30351	1.00498e-05
-15.5	1.12381	0.000202175		-15.4	1.32268	7.34561e-06
-15.5	1.14286	0.000157731		-15.4	1.34185	5.34147e-06
-15.5	1.16191	0.000122112		-15.4	1.36102	3.86511e-06
-15.5	1.18095	9.38232e-05		-15.4	1.38019	2.78383e-06
-15.5	1.2	7.15548e-05		-15.4	1.39936	1.99629e-06
-15.5	1.21905	5.41762e-05		-15.4	1.41853	1.42572e-06
-15.5	1.2381	4.07276e-05		-15.4	1.4377	1.01438e-06
-15.5	1.25714	3.04052e-05		-15.4	1.45687	7.19222e-07
-15.5	1.27619	2.25456e-05		-15.4	1.47604	5.0834e-07
-15.5	1.29524	1.66075e-05		-15.4	1.49521	3.58269e-07
-15.5	1.31429	1.2155e-05		-15.4	1.51438	2.5186e-07
-15.5	1.33333	8.84094e-06		-15.4	1.53355	1.76656e-07
-15.5	1.35238	6.39175e-06		-15.4	1.55272	1.23659e-07
-15.5	1.37143	4.59422e-06		-15.4	1.57189	8.64071e-08
-15.5	1.39048	3.28377e-06		-15.4	1.59105	6.02802e-08
-15.5	1.40952	2.33458e-06		-15.4	1.61022	4.1991e-08
-15.5	1.42857	1.65133e-06		-15.4	1.62939	2.92098e-08
-15.5	1.44762	1.16243e-06		-15.4	1.64856	2.02907e-08
-15.5	1.46667	8.14603e-07		-15.4	1.66773	1.40749e-08
-15.5	1.48571	5.68471e-07		-15.4	1.6869	9.74859e-09
-15.5	1.50476	3.95191e-07		-15.4	1.70607	6.74104e-09
-15.5	1.52381	2.73781e-07		-15.4	1.72524	4.653e-09
-15.5	1.54286	1.89089e-07		-15.4	1.74441	3.20538e-09
-15.5	1.56191	1.30247e-07		-15.4	1.76358	2.20333e-09
-15.5	1.58095	8.95112e-08		-15.4	1.78275	1.51093e-09
-15.5	1.6	6.13995e-08		-15.4	1.80192	1.03344e-09
-15.5	1.61905	4.20517e-08		-15.4	1.82109	7.04884e-10
-15.5	1.6381	2.87654e-08		-15.4	1.84026	4.79355e-10
-15.5	1.65714	1.96578e-08		-15.4	1.85943	3.24961e-10
-15.5	1.67619	1.34231e-08		-15.4	1.87859	2.1957e-10
-15.5	1.69524	9.15954e-09		-15.4	1.89776	1.47851e-10
-15.5	1.71429	6.24597e-09		-15.4	1.91693	9.92043e-11
-15.5	1.73333	4.256e-09		-15.4	1.9361	6.63207e-11
-15.5	1.75238	2.89746e-09		-15.4	1.95527	4.41716e-11
-15.5	1.77143	1.97041e-09		-15.4	1.97444	2.93078e-11
-15.5	1.79048	1.33816e-09		-15.4	1.99361	1.93706e-11
-15.5	1.80952	9.0729e-10		-15.4	2.01278	1.27528e-11
-15.5	1.82857	6.13962e-10		-15.4	2.03195	8.36286e-12
-15.5	1.84762	4.14536e-10		-15.4	2.05112	5.4624e-12
-15.5	1.86667	2.79178e-10		-15.4	2.07029	3.55373e-12
-15.5	1.88571	1.87491e-10		-15.4	2.08946	2.3028e-12
-15.5	1.90476	1.25531e-10		-15.4	2.10863	1.48627e-12
-15.5	1.92381	8.37716e-11		-15.4	2.1278	9.55467e-13
-15.5	1.94286	5.57105e-11		-15.4	2.14697	6.11803e-13
-15.5	1.96191	3.69149e-11		-15.4	2.16613	3.90207e-13
-15.5	1.98095	2.43687e-11		-15.4	2.1853	2.47898e-13
-15.5	2	1.60245e-11		-15.4	2.20447	1.56876e-13
-15.5	2.01905	1.04959e-11		-15.4	2.22364	9.88916e-14
-15.5	2.0381	6.84717e-12		-15.4	2.24281	6.21e-14
-15.5	2.05714	4.44881e-12		-15.4	2.26198	3.88479e-14
-15.5	2.07619	2.87876e-12		-15.4	2.28115	2.42104e-14
-15.5	2.09524	1.85521e-12		-15.4	2.30032	1.50318e-14
-15.5	2.11429	1.19072e-12		-15.4	2.31949	9.29837e-15
-15.5	2.13333	7.61132e-13		-15.4	2.33866	5.73071e-15
-15.5	2.15238	4.84571e-13		-15.4	2.35783	3.51909e-15
-15.5	2.17143	3.07267e-13		-15.4	2.377	2.15323e-15
-15.5	2.19048	1.94069e-13		-15.4	2.39617	1.31282e-15
-15.5	2.20952	1.22096e-13		-15.4	2.41534	7.97615e-16
-15.5	2.22857	7.65195e-14		-15.4	2.43451	4.82913e-16
-15.5	2.24762	4.77748e-14		-15.4	2.45367	2.91373e-16
-15.5	2.26667	2.97173e-14		-15.4	2.47284	1.75208e-16
-15.5	2.28571	1.84176e-14		-15.4	2.49201	1.05002e-16
-15.5	2.30476	1.13738e-14		-15.4	2.51118	6.27183e-17
-15.5	2.32381	6.9993e-15		-15.4	2.53035	3.73392e-17
-15.5	2.34286	4.29256e-15		-15.4	2.54952	2.21576e-17
-15.5	2.36191	2.62375e-15		-15.4	2.56869	1.31064e-17
-15.5	2.38095	1.59848e-15		-15.4	2.58786	7.72791e-18
-15.5	2.4	9.70741e-16		-15.4	2.60703	4.54227e-18
-15.5	2.41905	5.8768e-16		-15.4	2.6262	2.66152e-18
-15.5	2.4381	3.54692e-16		-15.4	2.64537	1.55469e-18
-15.5	2.45714	2.13433e-16		-15.4	2.66454	9.0538e-19
-15.5	2.47619	1.28055e-16		-15.4	2.68371	5.25653e-19
-15.5	2.49524	7.66094e-17		-15.4	2.70288	3.04271e-19
-15.5	2.51429	4.57022e-17		-15.4	2.72205	1.756e-19
-15.5	2.53333	2.71881e-17		-15.4	2.74121	1.01041e-19
-15.5	2.55238	1.61295e-17		-15.4	2.76038	5.79685e-20
-15.5	2.57143	9.5428e-18		-15.4	2.77955	3.31597e-20
-15.5	2.59048	5.63052e-18		-15.4	2.79872	1.8913e-20
-15.5	2.60952	3.31317e-18		-15.4	2.81789	1.07559e-20
-15.5	2.62857	1.94429e-18		-15.4	2.83706	6.09921e-21
-15.5	2.64762	1.13788e-18		-15.4	2.85623	3.4486e-21
-15.5	2.66667	6.64121e-19		-15.4	2.8754	1.94427e-21
-15.5	2.68571	3.86547e-19		-15.4	2.89457	1.09299e-21
-15.5	2.70476	2.24363e-19		-15.4	2.91374	6.12659e-22
-15.5	2.72381	1.29862e-19		-15.4	2.93291	3.42427e-22
-15.5	2.74286	7.49512e-20		-15.4	2.95208	1.90836e-22
-15.5	2.76191	4.31347e-20		-15.4	2.97125	1.06046e-22
-15.5	2.78095	2.47519e-20		-15.4	2.99042	5.8758e-23
-15.5	2.8	1.41615e-20		-15.4	3.00959	3.2462e-23
-15.5	2.81905	8.07808e-21		-15.4	3.02875	1.78819e-23
-15.5	2.8381	4.594e-21		-15.4	3.04792	9.82154e-24
-15.5	2.85714	2.60458e-21		-15.4	3.06709	5.37858e-24
-15.5	2.87619	1.47209e-21		-15.4	3.08626	2.93679e-24
-15.5	2.89524	8.29401e-22		-15.4	3.10543	1.59879e-24
-15.5	2.91429	4.65814e-22		-15.4	3.1246	8.67789e-25
-15.5	2.93333	2.60773e-22		-15.4	3.14377	4.69612e-25
-15.5	2.95238	1.45514e-22		-15.4	3.16294	2.53372e-25
-15.5	2.97143	8.0933e-23		-15.4	3.18211	1.36291e-25
-15.5	2.99048	4.48655e-23		-15.4	3.20128	7.30905e-26
-15.5	3.00952	2.47889e-23		-15.4	3.22045	3.90779e-26
-15.5	3.02857	1.36506e-23		-15.4	3.23962	2.08292e-26
-15.5	3.04762	7.49178e-24		-15.4	3.25879	1.10683e-26
-15.5	3.06667	4.09782e-24		-15.4	3.27796	5.86342e-27
-15.5	3.08571	2.23382e-24		-15.4	3.29713	3.09654e-27
-15.5	3.10476	1.21357e-24		-15.4	3.31629	1.63024e-27
-15.5	3.12381	6.57057e-25		-15.4	3.33546	8.55599e-28
-15.5	3.14286	3.54532e-25		-15.4	3.35463	4.47641e-28
-15.5	3.16191	1.90643e-25		-15.4	3.3738	2.33467e-28
-15.5	3.18095	1.02164e-25		-15.4	3.39297	1.21381e-28
-15.5	3.2	5.45612e-26		-15.4	3.41214	6.29073e-29
-15.5	3.21905	2.90389e-26		-15.4	3.43131	3.24993e-29
-15.5	3.2381	1.54023e-26		-15.4	3.45048	1.67365e-29
-15.5	3.25714	8.14143e-27		-15.4	3.46965	8.59149e-30
-15.5	3.27619	4.28872e-27		-15.4	3.48882	4.39625e-30
-15.5	3.29524	2.25147e-27		-15.4	3.50799	2.24235e-30
-15.5	3.31429	1.17793e-27		-15.4	3.52716	1.14006e-30
-15.5	3.33333	6.14169e-28		-15.4	3.54633	5.77762e-31
-15.5	3.35238	3.19135e-28		-15.4	3.5655	2.91856e-31
-15.5	3.37143	1.65266e-28		-15.4	3.58467	1.46954e-31
-15.5	3.39048	8.52931e-29		-15.4	3.60383	7.37539e-32
-15.5	3.40952	4.38704e-29		-15.4	3.623	3.68957e-32
-15.5	3.42857	2.24884e-29		-15.4	3.64217	1.83972e-32
-15.5	3.44762	1.14889e-29		-15.4	3.66134	9.14349e-33
-15.5	3.46667	5.84973e-30		-15.4	3.68051	4.52951e-33
-15.5	3.48571	2.96846e-30		-15.4	3.69968	2.2365e-33
-15.5	3.50476	1.50131e-30		-15.4	3.71885	1.10068e-33
-15.5	3.52381	7.56753e-31		-15.4	3.73802	5.3992e-34
-15.5	3.54286	3.80179e-31		-15.4	3.75719	2.63978e-34
-15.5	3.56191	1.9036e-31		-15.4	3.77636	1.2864e-34
-15.5	3.58095	9.49991e-32		-15.4	3.79553	6.24816e-35
-15.5	3.6	4.72524e-32		-15.4	3.8147	3.02478e-35
-15.5	3.61905	2.34256e-32		-15.4	3.83387	1.45949e-35
-15.5	3.6381	1.15751e-32		-15.4	3.85304	7.01891e-36
-15.5	3.65714	5.7007e-33		-15.4	3.8722	3.36434e-36
-15.5	3.67619	2.79837e-33		-15.4	3.89137	1.60727e-36
-15.5	3.69524	1.36917e-33		-15.4	3.91054	7.65307e-37
-15.5	3.71429	6.67712e-34		-15.4	3.92971	3.63194e-37
-15.5	3.73333	3.24566e-34		-15.4	3.94888	1.7179e-37
-15.5	3.75238	1.57254e-34		-15.4	3.96805	8.09857e-38
-15.5	3.77143	7.59428e-35		-15.4	3.98722	3.80515e-38
-15.5	3.79048	3.65563e-35		-15.4	4.00639	1.78191e-38
-15.5	3.80952	1.754e-35		-15.4	4.02556	8.31668e-39
-15.5	3.82857	8.38865e-36		-15.4	4.04473	3.86867e-39
-15.5	3.84762	3.999e-36		-15.4	4.0639	1.79358e-39
-15.5	3.86667	1.90024e-36		-15.4	4.08307	8.28753e-40
-15.5	3.88571	9.0005e-37		-15.4	4.10224	3.81658e-40
-15.5	3.90476	4.24939e-37		-15.4	4.12141	1.75173e-40
-15.5	3.92381	1.99982e-37		-15.4	4.14058	8.01312e-41
-15.5	3.94286	9.38124e-38		-15.4	4.15974	3.65323e-41
-15.5	3.96191	4.38668e-38		-15.4	4.17891	1.65994e-41
-15.5	3.98095	2.04465e-38		-15.4	4.19808	7.51707e-42
-15.5	4	9.49973e-39		-15.4	4.21725	3.39267e-42
-15.5	4.01905	4.3996e-39		-15.4	4.23642	1.52606e-42
-15.5	4.0381	2.03107e-39		-15.4	4.25559	6.84129e-43
-15.5	4.05714	9.34646e-40		-15.4	4.27476	3.0566e-43
-15.5	4.07619	4.28727e-40		-15.4	4.29393	1.36105e-43
-15.5	4.09524	1.96032e-40		-15.4	4.3131	6.04009e-44
-15.5	4.11429	8.93477e-41		-15.4	4.33227	2.67144e-44
-15.5	4.13333	4.05931e-41		-15.4	4.35144	1.17754e-44
-15.5	4.15238	1.83837e-41		-15.4	4.37061	5.17298e-45
-15.5	4.17143	8.29895e-42		-15.4	4.38978	2.26482e-45
-15.5	4.19048	3.73444e-42		-15.4	4.40895	9.88224e-46
-15.5	4.20952	1.67509e-42		-15.4	4.42812	4.2974e-46
-15.5	4.22857	7.48965e-43		-15.4	4.44728	1.86244e-46
-15.5	4.24762	3.33806e-43		-15.4	4.46645	8.04429e-47
-15.5	4.26667	1.48298e-43		-15.4	4.48562	3.46272e-47
-15.5	4.28571	6.56723e-44		-15.4	4.50479	1.4855e-47
-15.5	4.30476	2.89892e-44		-15.4	4.52396	6.35116e-48
-15.5	4.32381	1.27555e-44		-15.4	4.54313	2.70618e-48
-15.5	4.34286	5.59449e-45		-15.4	4.5623	1.14917e-48
-15.5	4.36191	2.44584e-45		-15.4	4.58147	4.86332e-49
-15.5	4.38095	1.06585e-45		-15.4	4.60064	2.05118e-49
-15.5	4.4	4.62984e-46		-15.4	4.61981	8.62179e-50
-15.5	4.41905	2.00463e-46		-15.4	4.63898	3.61169e-50
-15.5	4.4381	8.65168e-47		-15.4	4.65815	1.5078e-50
-15.5	4.45714	3.72187e-47		-15.4	4.67732	6.27332e-51
-15.5	4.47619	1.59594e-47		-15.4	4.69649	2.60118e-51
-15.5	4.49524	6.82128e-48		-15.4	4.71566	1.07488e-51
-15.5	4.51429	2.90606e-48		-15.4	4.73482	4.42659e-52
-15.5	4.53333	1.23405e-48		-15.4	4.75399	1.81675e-52
-15.5	4.55238	5.22335e-49		-15.4	4.77316	7.43086e-53
-15.5	4.57143	2.20369e-49		-15.4	4.79233	3.029e-53
-15.5	4.59048	9.26692e-50		-15.4	4.8115	1.23048e-53
-15.5	4.60952	3.88421e-50		-15.4	4.83067	4.98158e-54
-15.5	4.62857	1.62274e-50		-15.4	4.84984	2.0099e-54
-15.5	4.64762	6.75735e-51		-15.4	4.86901	8.08159e-55
-15.5	4.66667	2.80465e-51		-15.4	4.88818	3.23843e-55
-15.5	4.68571	1.16026e-51		-15.4	4.90735	1.29326e-55
-15.5	4.70476	4.78416e-52		-15.4	4.92652	5.14695e-56
-15.5	4.72381	1.9662e-52		-15.4	4.94569	2.0414e-56
-15.5	4.74286	8.05412e-53		-15.4	4.96486	8.06902e-57
-15.5	4.76191	3.28834e-53		-15.4	4.98403	3.17853e-57
-15.5	4.78095	1.33814e-53		-15.4	5.0032	1.2478e-57
-15.5	4.8	5.42735e-54		-15.4	5.02236	4.88173e-58
-15.5	4.81905	2.19401e-54		-15.4	5.04153	1.90334e-58
-15.5	4.8381	8.83992e-55		-15.4	5.0607	7.39553e-59
-15.5	4.85714	3.54991e-55		-15.4	5.07987	2.86375e-59
-15.5	4.87619	1.42084e-55		-15.4	5.09904	1.10513e-59
-15.5	4.89524	5.66794e-56		-15.4	5.11821	4.25011e-60
-15.5	4.91429	2.25352e-56		-15.4	5.13738	1.62892e-60
-15.5	4.93333	8.92995e-57		-15.4	5.15655	6.22172e-61
-15.5	4.95238	3.52685e-57		-15.4	5.17572	2.36827e-61
-15.5	4.97143	1.38827e-57		-15.4	5.19489	8.98385e-62
-15.5	4.99048	5.4464e-58		-15.4	5.21406	3.39628e-62
-15.5	5.00952	2.12956e-58		-15.4	5.23323	1.27955e-62
-15.5	5.02857	8.29882e-59		-15.4	5.2524	4.80417e-63
-15.5	5.04762	3.22318e-59		-15.4	5.27157	1.79759e-63
-15.5	5.06667	1.24766e-59		-15.4	5.29074	6.70304e-64
-15.5	5.08571	4.81334e-60		-15.4	5.3099	2.49094e-64
-15.5	5.10476	1.8507e-60		-15.4	5.32907	9.22496e-65
-15.5	5.12381	7.09193e-61		-15.4	5.34824	3.40467e-65
-15.5	5.14286	2.7085e-61		-15.4	5.36741	1.25226e-65
-15.5	5.16191	1.03093e-61		-15.4	5.38658	4.59013e-66
-15.5	5.18095	3.91077e-62		-15.4	5.40575	1.67673e-66
-15.5	5.2	1.47852e-62		-15.4	5.42492	6.10397e-67
-15.5	5.21905	5.57092e-63		-15.4	5.44409	2.21447e-67
-15.5	5.2381	2.09197e-63		-15.4	5.46326	8.00639e-68
-15.5	5.25714	7.82915e-64		-15.4	5.48243	2.88478e-68
-15.5	5.27619	2.92013e-64		-15.4	5.5016	1.03585e-68
-15.5	5.29524	1.08547e-64		-15.4	5.52077	3.70674e-69
-15.5	5.31429	4.02122e-65		-15.4	5.53994	1.32189e-69
-15.5	5.33333	1.48465e-65		-15.4	5.55911	4.69795e-70
-15.5	5.35238	5.46282e-66		-15.4	5.57828	1.66391e-70
-15.5	5.37143	2.00324e-66		-15.4	5.59744	5.87301e-71
-15.5	5.39048	7.321e-67		-15.4	5.61661	2.06586e-71
-15.5	5.40952	2.66643e-67		-15.4	5.63578	7.24186e-72
-15.5	5.42857	9.67859e-68		-15.4	5.65495	2.52993e-72
-15.5	5.44762	3.50117e-68		-15.4	5.67412	8.80798e-73
-15.5	5.46667	1.26222e-68		-15.4	5.69329	3.056e-73
-15.5	5.48571	4.53498e-69		-15.4	5.71246	1.05667e-73
-15.5	5.50476	1.62381e-69		-15.4	5.73163	3.64112e-74
-15.5	5.52381	5.79443e-70		-15.4	5.7508	1.25038e-74
-15.5	5.54286	2.06065e-70		-15.4	5.76997	4.27913e-75
-15.5	5.56191	7.30319e-71		-15.4	5.78914	1.45942e-75
-15.5	5.58095	2.57951e-71		-15.4	5.80831	4.96035e-76
-15.5	5.6	9.07981e-72		-15.4	5.82748	1.68018e-76
-15.5	5.61905	3.18516e-72		-15.4	5.84665	5.67164e-77
-15.5	5.6381	1.11352e-72		-15.4	5.86582	1.90797e-77
-15.5	5.65714	3.87953e-73		-15.4	5.88498	6.39651e-78
-15.5	5.67619	1.34702e-73		-15.4	5.90415	2.1371e-78
-15.5	5.69524	4.661e-74		-15.4	5.92332	7.11569e-79
-15.5	5.71429	1.6073e-74		-15.4	5.94249	2.36112e-79
-15.5	5.73333	5.52364e-75		-15.4	5.96166	7.80784e-80
-15.5	5.75238	1.89176e-75		-15.4	5.98083	2.57308e-80
-15.5	5.77143	6.45676e-76		-15.4	6	8.45055e-81
-15.5	5.79048	2.19621e-76		-15.35	0	0.000980103
-15.5	5.80952	7.44465e-77		-15.35	0.01917	0.00201
-15.5	5.82857	2.51491e-77		-15.35	0.03834	0.0032
-15.5	5.84762	8.46662e-78		-15.35	0.05751	0.00446
-15.5	5.86667	2.84057e-78		-15.35	0.07668	0.00576
-15.5	5.88571	9.49751e-79		-15.35	0.09585	0.00696
-15.5	5.90476	3.16462e-79		-15.35	0.11502	0.00794
-15.5	5.92381	1.05085e-79		-15.35	0.13419	0.00859
-15.5	5.94286	3.47749e-80		-15.35	0.15336	0.00883
-15.5	5.96191	1.14683e-80		-15.35	0.17252	0.00862
-15.5	5.98095	3.7691e-81		-15.35	0.19169	0.00796
-15.5	6	1.23448e-81		-15.35	0.21086	0.0069
-15.45	0	0.00658		-15.35	0.23003	0.00554
-15.45	0.01905	0.01272		-15.35	0.2492	0.004
-15.45	0.0381	0.01746		-15.35	0.26837	0.00242
-15.45	0.05714	0.02035		-15.35	0.28754	0.000984938
-15.45	0.07619	0.02197		-15.35	0.30671	0.000599132
-15.45	0.09524	0.02261		-15.35	0.32588	0.00141
-15.45	0.11429	0.02256		-15.35	0.34505	0.00192
-15.45	0.13333	0.02213		-15.35	0.36422	0.00202
-15.45	0.15238	0.02167		-15.35	0.38339	0.00172
-15.45	0.17143	0.02151		-15.35	0.40256	0.0011
-15.45	0.19048	0.02186		-15.35	0.42173	0.000646072
-15.45	0.20952	0.02274		-15.35	0.4409	0.00145
-15.45	0.22857	0.02401		-15.35	0.46006	0.00269
-15.45	0.24762	0.02545		-15.35	0.47923	0.00398
-15.45	0.26667	0.0268		-15.35	0.4984	0.0052
-15.45	0.28571	0.02787		-15.35	0.51757	0.00628
-15.45	0.30476	0.02855		-15.35	0.53674	0.00716
-15.45	0.32381	0.02877		-15.35	0.55591	0.00782
-15.45	0.34286	0.02852		-15.35	0.57508	0.00825
-15.45	0.36191	0.02785		-15.35	0.59425	0.00845
-15.45	0.38095	0.02682		-15.35	0.61342	0.00845
-15.45	0.4	0.02551		-15.35	0.63259	0.00828
-15.45	0.41905	0.02404		-15.35	0.65176	0.00797
-15.45	0.4381	0.02248		-15.35	0.67093	0.00756
-15.45	0.45714	0.02091		-15.35	0.6901	0.00707
-15.45	0.47619	0.0194		-15.35	0.70927	0.00653
-15.45	0.49524	0.01797		-15.35	0.72844	0.00596
-15.45	0.51429	0.01665		-15.35	0.7476	0.00539
-15.45	0.53333	0.01544		-15.35	0.76677	0.00483
-15.45	0.55238	0.01431		-15.35	0.78594	0.00429
-15.45	0.57143	0.01326		-15.35	0.80511	0.00378
-15.45	0.59048	0.01226		-15.35	0.82428	0.0033
-15.45	0.60952	0.01132		-15.35	0.84345	0.00285
-15.45	0.62857	0.01041		-15.35	0.86262	0.00245
-15.45	0.64762	0.00955		-15.35	0.88179	0.00209
-15.45	0.66667	0.00872		-15.35	0.90096	0.00177
-15.45	0.68571	0.00794		-15.35	0.92013	0.00148
-15.45	0.70476	0.0072		-15.35	0.9393	0.00123
-15.45	0.72381	0.0065		-15.35	0.95847	0.00102
-15.45	0.74286	0.00586		-15.35	0.97764	0.000838317
-15.45	0.76191	0.00526		-15.35	0.99681	0.000683712
-15.45	0.78095	0.0047		-15.35	1.01597	0.000553792
-15.45	0.8	0.00419		-15.35	1.03514	0.000445512
-15.45	0.81905	0.00372		-15.35	1.05431	0.000355986
-15.45	0.8381	0.00328		-15.35	1.07348	0.000282543
-15.45	0.85714	0.00288		-15.35	1.09265	0.000222758
-15.45	0.87619	0.00251		-15.35	1.11182	0.000174458
-15.45	0.89524	0.00218		-15.35	1.13099	0.00013573
-15.45	0.91429	0.00187		-15.35	1.15016	0.000104908
-15.45	0.93333	0.0016		-15.35	1.16933	8.05599e-05
-15.45	0.95238	0.00135		-15.35	1.1885	6.14664e-05
-15.45	0.97143	0.00114		-15.35	1.20767	4.66022e-05
-15.45	0.99048	0.000949299		-15.35	1.22684	3.51135e-05
-15.45	1.00952	0.00078499		-15.35	1.24601	2.62965e-05
-15.45	1.02857	0.000643788		-15.35	1.26518	1.95768e-05
-15.45	1.04762	0.000523652		-15.35	1.28435	1.44904e-05
-15.45	1.06667	0.000422456		-15.35	1.30351	1.06659e-05
-15.45	1.08571	0.000338055		-15.35	1.32268	7.80871e-06
-15.45	1.10476	0.000268349		-15.35	1.34185	5.68755e-06
-15.45	1.12381	0.000211331		-15.35	1.36102	4.12231e-06
-15.45	1.14286	0.000165131		-15.35	1.38019	2.97399e-06
-15.45	1.16191	0.000128043		-15.35	1.39936	2.1362e-06
-15.45	1.18095	9.85372e-05		-15.35	1.41853	1.52817e-06
-15.45	1.2	7.52709e-05		-15.35	1.4377	1.08909e-06
-15.45	1.21905	5.70824e-05		-15.35	1.45687	7.73478e-07
-15.45	1.2381	4.29826e-05		-15.35	1.47604	5.47603e-07
-15.45	1.25714	3.21417e-05		-15.35	1.49521	3.8659e-07
-15.45	1.27619	2.38729e-05		-15.35	1.51438	2.72229e-07
-15.45	1.29524	1.76147e-05		-15.35	1.53355	1.91267e-07
-15.45	1.31429	1.29139e-05		-15.35	1.55272	1.34117e-07
-15.45	1.33333	9.40884e-06		-15.35	1.57189	9.38767e-08
-15.45	1.35238	6.81392e-06		-15.35	1.59105	6.56063e-08
-15.45	1.37143	4.90604e-06		-15.35	1.61022	4.57828e-08
-15.45	1.39048	3.51267e-06		-15.35	1.62939	3.19052e-08
-15.45	1.40952	2.50161e-06		-15.35	1.64856	2.22042e-08
-15.45	1.42857	1.77251e-06		-15.35	1.66773	1.54314e-08
-15.45	1.44762	1.24989e-06		-15.35	1.6869	1.07088e-08
-15.45	1.46667	8.77394e-07		-15.35	1.70607	7.41965e-09
-15.45	1.48571	6.1334e-07		-15.35	1.72524	5.13177e-09
-15.45	1.50476	4.27113e-07		-15.35	1.74441	3.54251e-09
-15.45	1.52381	2.96401e-07		-15.35	1.76358	2.44022e-09
-15.45	1.54286	2.0506e-07		-15.35	1.78275	1.67698e-09
-15.45	1.56191	1.41488e-07		-15.35	1.80192	1.14954e-09
-15.45	1.58095	9.74018e-08		-15.35	1.82109	7.85822e-10
-15.45	1.6	6.69257e-08		-15.35	1.84026	5.35612e-10
-15.45	1.61905	4.5915e-08		-15.35	1.85943	3.63937e-10
-15.45	1.6381	3.14622e-08		-15.35	1.87859	2.46482e-10
-15.45	1.65714	2.15383e-08		-15.35	1.89776	1.66366e-10
-15.45	1.67619	1.47333e-08		-15.35	1.91693	1.11896e-10
-15.45	1.69524	1.00718e-08		-15.35	1.9361	7.49872e-11
-15.45	1.71429	6.88079e-09		-15.35	1.95527	5.00666e-11
-15.45	1.73333	4.6975e-09		-15.35	1.97444	3.33015e-11
-15.45	1.75238	3.20429e-09		-15.35	1.99361	2.20654e-11
-15.45	1.77143	2.18346e-09		-15.35	2.01278	1.45636e-11
-15.45	1.79048	1.48592e-09		-15.35	2.03195	9.57473e-12
-15.45	1.80952	1.00961e-09		-15.35	2.05112	6.27004e-12
-15.45	1.82857	6.84695e-10		-15.35	2.07029	4.08974e-12
-15.45	1.84762	4.63325e-10		-15.35	2.08946	2.65705e-12
-15.45	1.86667	3.12747e-10		-15.35	2.10863	1.71943e-12
-15.45	1.88571	2.10523e-10		-15.35	2.1278	1.10828e-12
-15.45	1.90476	1.41285e-10		-15.35	2.14697	7.11546e-13
-15.45	1.92381	9.45116e-11		-15.35	2.16613	4.55041e-13
[truncated: 296,938+ more rows]

## Sheet: Fig.2(e)
	ZSO			HESE
Radial distance	FT magnitude		Radial distance	FT magnitude
0	0.13987		0	0.1641
0.03068	0.14056		0.03068	0.161
0.06136	0.14255		0.06136	0.15236
0.09204	0.14562		0.09204	0.1403
0.12272	0.14942		0.12272	0.12844
0.1534	0.1535		0.1534	0.12155
0.18408	0.15739		0.18408	0.12353
0.21476	0.1607		0.21476	0.13445
0.24544	0.16316		0.24544	0.15065
0.27612	0.16479		0.27612	0.16751
0.3068	0.16599		0.3068	0.18136
0.33748	0.16754		0.33748	0.19002
0.36816	0.1706		0.36816	0.19273
0.39884	0.1764		0.39884	0.1903
0.42951	0.18589		0.42951	0.18522
0.46019	0.19934		0.46019	0.18156
0.49087	0.21617		0.49087	0.18401
0.52155	0.23513		0.52155	0.19575
0.55223	0.25459		0.55223	0.21644
0.58291	0.27287		0.58291	0.24266
0.61359	0.28847		0.61359	0.26985
0.64427	0.30025		0.64427	0.29379
0.67495	0.30764		0.67495	0.31127
0.70563	0.31072		0.70563	0.32039
0.73631	0.31033		0.73631	0.32071
0.76699	0.30814		0.76699	0.31358
0.79767	0.30648		0.79767	0.30243
0.82835	0.30788		0.82835	0.29277
0.85903	0.31439		0.85903	0.29126
0.88971	0.32673		0.88971	0.30305
0.92039	0.34393		0.92039	0.32881
0.95107	0.36357		0.95107	0.36431
0.98175	0.38249		0.98175	0.40293
1.01243	0.39743		1.01243	0.43794
1.04311	0.4056		1.04311	0.46368
1.07379	0.40503		1.07379	0.47591
1.10447	0.3949		1.10447	0.47202
1.13515	0.37595		1.13515	0.45123
1.16583	0.35103		1.16583	0.41493
1.19651	0.32593		1.19651	0.36757
1.22718	0.30984		1.22718	0.31817
1.25786	0.31341		1.25786	0.28262
1.28854	0.34299		1.28854	0.28087
1.31922	0.39623		1.31922	0.32074
1.3499	0.46515		1.3499	0.38987
1.38058	0.54111		1.38058	0.47082
1.41126	0.61691		1.41126	0.55068
1.44194	0.68693		1.44194	0.62097
1.47262	0.74693		1.47262	0.6762
1.5033	0.79386		1.5033	0.71311
1.53398	0.82578		1.53398	0.73039
1.56466	0.84183		1.56466	0.72854
1.59534	0.84217		1.59534	0.70987
1.62602	0.82794		1.62602	0.67829
1.6567	0.80107		1.6567	0.63915
1.68738	0.76414		1.68738	0.59869
1.71806	0.72005		1.71806	0.5631
1.74874	0.67172		1.74874	0.53702
1.77942	0.62168		1.77942	0.52198
1.8101	0.57171		1.8101	0.51571
1.84078	0.52252		1.84078	0.51316
1.87146	0.47375		1.87146	0.50834
1.90214	0.42417		1.90214	0.49609
1.93282	0.37212		1.93282	0.47294
1.9635	0.31615		1.9635	0.43742
1.99418	0.2556		1.99418	0.38999
2.02485	0.19155		2.02485	0.33295
2.05553	0.12935		2.05553	0.27045
2.08621	0.08991		2.08621	0.20903
2.11689	0.11179		2.11689	0.15915
2.14757	0.17372		2.14757	0.13571
2.17825	0.24373		2.17825	0.14463
2.20893	0.31074		2.20893	0.1705
2.23961	0.36956		2.23961	0.19607
2.27029	0.4168		2.27029	0.21233
2.30097	0.45011		2.30097	0.2155
2.33165	0.468		2.33165	0.20458
2.36233	0.46991		2.36233	0.18034
2.39301	0.45619		2.39301	0.1448
2.42369	0.42808		2.42369	0.10097
2.45437	0.38771		2.45437	0.05304
2.48505	0.33808		2.48505	0.01794
2.51573	0.28311		2.51573	0.05259
2.54641	0.22793		2.54641	0.09397
2.57709	0.17962		2.57709	0.12769
2.60777	0.14778		2.60777	0.15088
2.63845	0.14036		2.63845	0.16211
2.66913	0.15352		2.66913	0.16096
2.69981	0.17454		2.69981	0.14798
2.73049	0.19343		2.73049	0.12463
2.76117	0.20499		2.76117	0.09311
2.79185	0.20709		2.79185	0.05631
2.82252	0.1993		2.82252	0.01871
2.8532	0.18233		2.8532	0.02515
2.88388	0.1576		2.88388	0.0591
2.91456	0.12708		2.91456	0.08769
2.94524	0.09302		2.94524	0.10817
2.97592	0.05791		2.97592	0.1193
3.0066	0.02494		3.0066	0.12096
3.03728	0.01462		3.03728	0.11438
3.06796	0.03782		3.06796	0.10265
3.09864	0.058		3.09864	0.09166
3.12932	0.07182		3.12932	0.08983
3.16	0.07881		3.16	0.1023
3.19068	0.07934		3.19068	0.12534
3.22136	0.07447		3.22136	0.15174
3.25204	0.06617		3.25204	0.17582
3.28272	0.05773		3.28272	0.19375
3.3134	0.05389		3.3134	0.20306
3.34408	0.05843		3.34408	0.20237
3.37476	0.07025		3.37476	0.19126
3.40544	0.08537		3.40544	0.17016
3.43612	0.10052		3.43612	0.14032
3.4668	0.11365		3.4668	0.10364
3.49748	0.12355		3.49748	0.06251
3.52816	0.1296		3.52816	0.01964
3.55884	0.13154		3.55884	0.02218
3.58952	0.12941		3.58952	0.06018
3.62019	0.12345		3.62019	0.09197
3.65087	0.114		3.65087	0.11562
3.68155	0.10149		3.68155	0.12981
3.71223	0.08632		3.71223	0.134
3.74291	0.06897		3.74291	0.1285
3.77359	0.04997		3.77359	0.11466
3.80427	0.03038		3.80427	0.09535
3.83495	0.0156		3.83495	0.07617
3.86563	0.02441		3.86563	0.0675
3.89631	0.045		3.89631	0.07805
3.92699	0.06673		3.92699	0.10199
3.95767	0.08752		3.95767	0.12936
3.98835	0.10628		3.98835	0.15423
4.01903	0.1221		4.01903	0.17332
4.04971	0.13416		4.04971	0.18474
4.08039	0.14184		4.08039	0.18757
4.11107	0.14468		4.11107	0.18163
4.14175	0.14248		4.14175	0.16744
4.17243	0.13529		4.17243	0.14606
4.20311	0.12345		4.20311	0.11903
4.23379	0.10758		4.23379	0.0882
4.26447	0.08856		4.26447	0.05559
4.29515	0.06747		4.29515	0.02331
4.32583	0.0457		4.32583	0.00813
4.35651	0.02535		4.35651	0.03415
4.38719	0.01384		4.38719	0.05584
4.41786	0.02287		4.41786	0.07193
4.44854	0.03604		4.44854	0.08217
4.47922	0.04633		4.47922	0.08687
4.5099	0.05243		4.5099	0.08687
4.54058	0.05402		4.54058	0.0835
4.57126	0.05125		4.57126	0.07844
4.60194	0.04471		4.60194	0.07351
4.63262	0.03565		4.63262	0.07017
4.6633	0.02669		4.6633	0.06893
4.69398	0.02356		4.69398	0.06912
4.72466	0.03053		4.72466	0.0694
4.75534	0.0429		4.75534	0.06837
4.78602	0.05612		4.78602	0.06512
4.8167	0.06808		4.8167	0.05925
4.84738	0.07768		4.84738	0.0509
4.87806	0.08434		4.87806	0.04067
4.90874	0.08786		4.90874	0.02959
4.93942	0.08834		4.93942	0.01927
4.9701	0.08624		4.9701	0.01272
5.00078	0.08224		5.00078	0.01314
5.03146	0.07729		5.03146	0.01647
5.06214	0.07242		5.06214	0.01805
5.09282	0.06857		5.09282	0.0163
5.1235	0.0663		5.1235	0.01113
5.15418	0.06558		5.15418	0.0065
5.18486	0.06583		5.18486	0.01552
5.21553	0.06623		5.21553	0.03088
5.24621	0.06603		5.24621	0.0485
5.27689	0.06477		5.27689	0.06695
5.30757	0.06236		5.30757	0.085
5.33825	0.05903		5.33825	0.10153
5.36893	0.0553		5.36893	0.11555
5.39961	0.0519		5.39961	0.12625
5.43029	0.04959		5.43029	0.13311
5.46097	0.0488		5.46097	0.13588
5.49165	0.04948		5.49165	0.13461
5.52233	0.0511		5.52233	0.12969
5.55301	0.05296		5.55301	0.12176
5.58369	0.05447		5.58369	0.11171
5.61437	0.05534		5.61437	0.1006
5.64505	0.05557		5.64505	0.0896
5.67573	0.05547		5.67573	0.07977
5.70641	0.05555		5.70641	0.07194
5.73709	0.05637		5.73709	0.06638
5.76777	0.05827		5.76777	0.06274
5.79845	0.06128		5.79845	0.06022
5.82913	0.06505		5.82913	0.05794
5.85981	0.06902		5.85981	0.05528
5.89049	0.07261		5.89049	0.05194
5.92117	0.07531		5.92117	0.04794
5.95185	0.07678		5.95185	0.0435
5.98253	0.07686		5.98253	0.03889
6.0132	0.07559		6.0132	0.03438
6.04388	0.07317		6.04388	0.03013
6.07456	0.06994		6.07456	0.02631
6.10524	0.0663		6.10524	0.0233
6.13592	0.06265		6.13592	0.02204
6.1666	0.05928		6.1666	0.0238
6.19728	0.0563		6.19728	0.02903
6.22796	0.05356		6.22796	0.03698
6.25864	0.05078		6.25864	0.04657
6.28932	0.04754		6.28932	0.05682
6.32	0.04346		6.32	0.06689
6.35068	0.03827		6.35068	0.07604
6.38136	0.03183		6.38136	0.08364
6.41204	0.02416		6.41204	0.08917
6.44272	0.01553		6.44272	0.09229
6.4734	0.00718		6.4734	0.09278
6.50408	0.00835		6.50408	0.09062
6.53476	0.01816		6.53476	0.08592
6.56544	0.02897		6.56544	0.07897
6.59612	0.03975		6.59612	0.07012
6.6268	0.05014		6.6268	0.05981
6.65748	0.05992		6.65748	0.04853
6.68816	0.06894		6.68816	0.03677
6.71884	0.07714		6.71884	0.02519
6.74952	0.08449		6.74952	0.01539
6.7802	0.09099		6.7802	0.01304
6.81087	0.09664		6.81087	0.02081
6.84155	0.10145		6.84155	0.03192
6.87223	0.10541		6.87223	0.04377
6.90291	0.10848		6.90291	0.05569
6.93359	0.11061		6.93359	0.06734
6.96427	0.11176		6.96427	0.07843
6.99495	0.11189		6.99495	0.08869
7.02563	0.111		7.02563	0.09788
7.05631	0.10914		7.05631	0.10581
7.08699	0.10643		7.08699	0.11243
7.11767	0.10304		7.11767	0.11783
7.14835	0.09927		7.14835	0.12228
7.17903	0.09549		7.17903	0.1262
7.20971	0.0922		7.20971	0.1301
7.24039	0.08996		7.24039	0.13448
7.27107	0.08935		7.27107	0.13972
7.30175	0.09087		7.30175	0.14595
7.33243	0.09476		7.33243	0.15303
7.36311	0.101		7.36311	0.16056
7.39379	0.10931		7.39379	0.168
7.42447	0.11926		7.42447	0.17473
7.45515	0.13035		7.45515	0.18021
7.48583	0.14208		7.48583	0.18397
7.51651	0.15398		7.51651	0.18571
7.54719	0.16563		7.54719	0.18531
7.57787	0.17665		7.57787	0.18282
7.60854	0.1867		7.60854	0.17845
7.63922	0.19553		7.63922	0.17258
7.6699	0.20289		7.6699	0.16567
7.70058	0.20862		7.70058	0.1583
7.73126	0.21262		7.73126	0.15106
7.76194	0.21482		7.76194	0.14453
7.79262	0.21523		7.79262	0.13921
7.8233	0.21391		7.8233	0.13544
7.85398	0.21096		7.85398	0.13338
7.88466	0.20655		7.88466	0.13298
7.91534	0.20088		7.91534	0.134
7.94602	0.19419		7.94602	0.13611
7.9767	0.18679		7.9767	0.13893
8.00738	0.179		8.00738	0.14213
8.03806	0.17116		8.03806	0.14543
8.06874	0.16364		8.06874	0.14866
8.09942	0.1568		8.09942	0.15175
8.1301	0.15096		8.1301	0.15474
8.16078	0.14636		8.16078	0.15773
8.19146	0.14313		8.19146	0.16091
8.22214	0.14131		8.22214	0.16446
8.25282	0.14077		8.25282	0.16855
8.2835	0.14132		8.2835	0.17322
8.31418	0.14271		8.31418	0.17845
8.34486	0.14465		8.34486	0.18404
8.37554	0.1469		8.37554	0.18972
8.40621	0.14925		8.40621	0.19511
8.43689	0.15153		8.43689	0.19981
8.46757	0.15363		8.46757	0.20344
8.49825	0.15546		8.49825	0.20567
8.52893	0.15698		8.52893	0.20623
8.55961	0.15815		8.55961	0.20495
8.59029	0.15893		8.59029	0.20179
8.62097	0.15931		8.62097	0.19677
8.65165	0.15922		8.65165	0.19003
8.68233	0.15863		8.68233	0.18178
8.71301	0.15748		8.71301	0.1723
8.74369	0.15571		8.74369	0.16189
8.77437	0.15326		8.77437	0.15091
8.80505	0.15008		8.80505	0.13969
8.83573	0.14617		8.83573	0.12857
8.86641	0.14153		8.86641	0.11788
8.89709	0.13623		8.89709	0.10788
8.92777	0.1304		8.92777	0.09883
8.95845	0.12424		8.95845	0.09094
8.98913	0.11804		8.98913	0.08434
9.01981	0.11215		9.01981	0.07915
9.05049	0.107		9.05049	0.07541
9.08117	0.10301		9.08117	0.07311
9.11185	0.10052		9.11185	0.07219
9.14253	0.0997		9.14253	0.07251
9.17321	0.10046		9.17321	0.07391
9.20388	0.1025		9.20388	0.07616
9.23456	0.10531		9.23456	0.079
9.26524	0.10834		9.26524	0.08214
9.29592	0.11104		9.29592	0.08527
9.3266	0.11296		9.3266	0.08806
9.35728	0.11371		9.35728	0.09021
9.38796	0.11304		9.38796	0.09143
9.41864	0.1108		9.41864	0.09148
9.44932	0.10697		9.44932	0.09016
9.48	0.10158		9.48	0.08736
9.51068	0.09477		9.51068	0.08303
9.54136	0.08675		9.54136	0.07723
9.57204	0.07777		9.57204	0.0701
9.60272	0.06811		9.60272	0.06188
9.6334	0.05807		9.6334	0.05295
9.66408	0.04798		9.66408	0.04388
9.69476	0.03813		9.69476	0.03551
9.72544	0.02881		9.72544	0.02923
9.75612	0.02035		9.75612	0.02683
9.7868	0.01317		9.7868	0.02901
9.81748	0.00833		9.81748	0.03435
9.84816	0.00779		9.84816	0.04093
9.87884	0.0105		9.87884	0.04756
9.90952	0.01372		9.90952	0.05356
9.9402	0.01651		9.9402	0.0586
9.97088	0.01873		9.97088	0.06247

## Sheet: Fig.2(f)
Name	Strong	Medium	Weak
2M ZSO	49.03	27.99	22.98
1HESE	46.87	29.8	23.33
HESE	43.07	30.94	25.99
3HESE	41.13	33.65	25.22
5HESE	33.11	41.97	24.92

## Sheet: Fig.2(g)
			ZSO					HESE
r	g(r)	r	Coordination number		r	g(r)	r	Coordination number
0	0	0	0		0	0	0	0
0.05	0	1.95	0		0.05	0	1.95	0.0356
0.15	0	2.01	0.105		0.15	0	1.96	0.0875
0.25	0	2.03	0.227		0.25	0	1.97	0.139
0.35	0	2.04	0.366		0.35	0	2	0.243
0.45	0	2.06	0.539		0.45	0	2.02	0.364
0.55	0	2.08	0.661		0.55	0	2.03	0.399
0.65	0	2.09	0.782		0.65	0	2.03	0.468
0.75	0	2.11	0.939		0.75	0	2.04	0.607
0.85	0	2.13	1.03		0.85	0	2.07	0.745
0.95	0	2.14	1.11		0.95	0	2.09	0.987
1.05	0	2.16	1.36		1.05	0	2.09	1.09
1.15	0	2.16	1.55		1.15	0	2.11	1.23
1.25	0	2.15	1.72		1.25	0	2.11	1.37
1.35	0	2.15	1.89		1.35	0	2.11	1.47
1.45	0	2.17	2.07		1.45	0	2.11	1.51
1.55	0	2.18	2.19		1.55	0	2.12	1.56
1.65	0	2.2	2.41		1.65	0	2.12	1.63
1.75	0	2.21	2.57		1.75	0	2.12	1.73
1.85	0	2.2	2.94		1.85	0	2.12	1.8
1.95	0	2.2	3.11		1.95	0	2.12	1.87
2.05	2.95236	2.21	3.3		2.05	3.18313	2.12	1.94
2.15	49.9933	2.22	3.47		2.15	34.1393	2.13	2.03
2.25	13.9963	2.23	3.68		2.25	4.59885	2.13	2.06
2.35	5.99376	2.23	3.87		2.35	0.8662	2.14	2.13
2.45	0.99203	2.23	4.06		2.45	1.02154	2.15	2.2
2.55	1.01579	2.24	4.27		2.55	0.80699	2.14	2.25
2.65	0.96272	2.26	4.52		2.65	1.21277	2.14	2.37
2.75	0.99676	2.26	4.64		2.75	1.25609	2.14	2.42
2.85	1.00936	2.26	4.78		2.85	1.45789	2.14	2.56
2.95	1.00281	2.28	4.93		2.95	1.33248	2.15	2.63
3.05	1.00209	2.29	5.07		3.05	1.29018	2.15	2.68
3.15	0.99258	2.3	5.19		3.15	1.66844	2.15	2.75
3.25	0.99102	2.3	5.3		3.25	1.15178	2.15	2.82
3.35	1.32984	2.32	5.42		3.35	1.68599	2.17	2.91
3.45	1.33207	2.37	5.54		3.45	1.49517	2.18	3.01
3.55	1.61123	2.43	5.59		3.55	1.33888	2.2	3.06
3.65	1.25273	2.54	5.61		3.65	1.24272	2.22	3.1
3.75	0.89011	2.63	5.63		3.75	1.00708	2.26	3.1
3.85	0.97584	2.71	5.63		3.85	0.98464	2.3	3.1
3.95	0.4457	2.83	5.63		3.95	0.95945	2.33	3.1
4.05	0.64442	2.94	5.63		4.05	0.92497	2.38	3.1
4.15	0.58144	3.08	5.66		4.15	1.05176	2.45	3.08
4.25	0.462	3.16	5.66		4.25	1.02999	2.53	3.08
4.35	0.58801	3.38	5.66		4.35	1.04416	2.59	3.06
4.45	0.61807	3.42	5.68		4.45	0.99776	2.64	3.06
4.55	0.57776	3.48	5.66		4.55	0.93766	2.72	3.06
4.65	0.6175	3.52	5.73		4.65	0.96047	2.75	3.07
4.75	0.76438	3.55	5.8		4.75	0.85525	2.8	3.08
4.85	0.95787	3.58	5.87		4.85	0.80318	2.88	3.1
4.95	1.22608	3.63	5.96		4.95	0.84287	2.89	3.12
5.05	1.19982	3.67	6.06		5.05	0.93197	2.96	3.17
5.15	1.26905	3.69	6.17		5.15	0.94616	3.01	3.2
5.25	0.89821	3.71	6.27		5.25	0.90732	3.06	3.27
5.35	1.0496	3.74	6.38		5.35	0.92511	3.1	3.34
5.45	1.10509	3.76	6.53		5.45	0.90799	3.14	3.39
5.55	0.98435	3.78	6.64		5.55	0.97763	3.17	3.43
5.65	1.01953	3.8	6.71		5.65	0.95779	3.22	3.48
5.75	0.98437	3.83	6.85		5.75	0.89859	3.22	3.5
5.85	1.03229	3.88	6.97		5.85	0.95158	3.24	3.55
5.95	1.02931	3.92	7.07		5.95	0.95082	3.29	3.71
6.05	1.04877	3.96	7.21		6.05	0.95748	3.35	3.84
6.15	1.22087	4	7.3		6.15	1.04328	3.37	3.86
6.25	1.15363	4.08	7.51		6.25	1.06554	3.39	3.93
6.35	1.04859	4.12	7.58		6.35	1.04727	3.41	3.98
6.45	1.09657	4.16	7.64		6.45	1.00049	3.46	4.07
6.55	1.09576	4.23	7.73		6.55	1.00917	3.49	4.17
6.65	1.11967	4.31	7.84		6.65	0.98361	3.52	4.21
6.75	0.96463	4.38	7.91		6.75	1.02495	3.54	4.26
6.85	1.09674	4.43	8.03		6.85	1.02291	3.59	4.35
6.95	0.89264	4.46	8.15		6.95	0.96442	3.63	4.45
7.05	1.05219	4.48	8.18		7.05	1.0069	3.65	4.49
7.15	0.95767	4.53	8.31		7.15	0.99304	3.68	4.55
7.25	0.96848	4.55	8.37		7.25	0.97187	3.69	4.59
7.35	0.88051	4.57	8.43		7.35	1.00434	3.73	4.68
7.45	0.87708	4.61	8.53		7.45	0.96145	3.76	4.75
7.55	0.79544	4.64	8.58		7.55	0.98523	3.8	4.81
7.65	0.96491	4.66	8.67		7.65	0.98675	3.83	4.92
7.75	1.0328	4.71	8.79		7.75	0.9384	3.88	5.02
7.85	0.96603	4.73	8.86		7.85	0.99281	3.93	5.18
7.95	0.99469	4.76	8.93		7.95	0.95522	3.97	5.26
8.05	1.03452	4.8	9.02		8.05	0.96724	4.04	5.44
8.15	1.0051	4.83	9.09		8.15	0.98187	4.07	5.49
8.25	1.12802	4.88	9.16		8.25	1.00398	4.17	5.65
8.35	1.02536	4.99	9.24		8.35	1.01069	4.24	5.75
8.45	1.05967	5.02	9.26		8.45	0.94207	4.29	5.89
8.55	0.99698	5.06	9.37		8.55	0.9687	4.34	5.99
8.65	0.9406	5.09	9.47		8.65	0.9711	4.39	6.1
8.75	1.03912	5.11	9.54		8.75	0.98934	4.45	6.2
8.85	1.12587	5.13	9.61		8.85	0.97558	4.53	6.37
8.95	0.98973	5.15	9.68		8.95	0.98847	4.57	6.49
9.05	0.91703	5.18	9.75		9.05	1.00619	4.64	6.72
9.15	1.03	5.2	9.82		9.15	0.98914	4.68	6.84
9.25	0.97534	5.24	9.9		9.25	1.01001	4.79	7.15
9.35	0.9864	5.27	9.96		9.35	0.98357	4.89	7.43
9.45	1.04351	5.34	10.1		9.45	0.9816	4.96	7.67
9.55	1.05227	5.37	10.1		9.55	1.01302	5.06	7.95
9.65	1.01564	5.41	10.2		9.65	1.00484	5.1	8.09
9.75	0.9042	5.42	10.2		9.75	1.01589	5.14	8.19
9.85	0.96908	5.48	10.3		9.85	0.98407	5.2	8.36
9.95	1.03119				9.95	1.01013	5.26	8.47
10.05	0.97772				10.05	1.00269	5.3	8.64
10.15	0.97745				10.15	0.99451	5.33	8.75
10.25	1.03525				10.25	0.98536	5.35	8.81
10.35	1.08805				10.35	0.98176	5.39	8.88
10.45	0.98836				10.45	0.98736	5.41	8.99
10.55	0.97221				10.55	0.98817	5.44	9.09
10.65	0.95404				10.65	0.96868	5.47	9.23
10.75	1.01581				10.75	1.01464	5.52	9.33
10.85	1.0846				10.85	1.0095	5.53	9.4
10.95	0.98136				10.95	1.01088	5.58	9.54
11.05	0.92495				11.05	0.9903	5.6	9.61
11.15	0.91067				11.15	0.99095	5.68	9.71
11.25	0.97368				11.25	0.98617	5.71	9.78
11.35	0.96308				11.35	0.96282	5.8	9.91
11.45	1.02059				11.45	0.9925	5.84	10
11.55	0.95504				11.55	0.9875	5.88	10.1
11.65	1.06578				11.65	0.98422	5.89	10.2
11.75	1.02354				11.75	0.97945	5.9	10.2
11.85	0.96474				11.85	1.01537	5.94	10.3
11.95	1.03827				11.95	0.98491	5.95	10.4
12.05	0.99237				12.05	0.99049	5.98	10.4
12.15	0.99306				12.15	1.03306	6.01	10.5
12.25	1.03809				12.25	0.99109	6.02	10.5
12.35	0.98122				12.35	0.98588	6.05	10.6
12.45	1.02474				12.45	1.01254	6.06	10.6
12.55	1.01025				12.55	0.98163	6.11	10.7
12.65	0.98738				12.65	0.99663	6.15	10.7
12.75	0.95998				12.75	0.98905
12.85	1.00911				12.85	1.00289
12.95	0.95212				12.95	0.98557
13.05	1.02905				13.05	0.97797
13.15	1.04242				13.15	1.00336
13.25	1.01565				13.25	1.00535
13.35	0.98488				13.35	0.9706
13.45	0.97952				13.45	0.98796
13.55	0.94845				13.55	0.99212
13.65	1.02717				13.65	0.99018
13.75	1.00051				13.75	0.99994
13.85	1.03107				13.85	0.99848
13.95	1.06923				13.95	1.01653
14.05	1.01038				14.05	0.98867
14.15	0.97809				14.15	0.98123
14.25	0.99592				14.25	0.99591
14.35	0.95372				14.35	1.00547
14.45	0.99252				14.45	0.99036
14.55	1.00783				14.55	1.00336
14.65	1.03171				14.65	0.99711
14.75	0.97301				14.75	1.01081
14.85	0.96752				14.85	0.98207
14.95	1.02806				14.95	1.00176
15.05	1.01321				15.05	0.98989
15.15	0.98291				15.15	0.99283
15.25	1.03226				15.25	1.00131
15.35	1.02594				15.35	0.99308
15.45	0.96492				15.45	1.00975
15.55	1.05494				15.55	1.00014
15.65	1.01424				15.65	0.99765
15.75	1.00925				15.75	1.0049
15.85	0.97109				15.85	1.00237
15.95	0.97645				15.95	0.99812
16.05	0.95352				16.05	0.98852
16.15	1.01641				16.15	1.00031
16.25	0.95232				16.25	0.99568
16.35	0.96672				16.35	1.00253
16.45	0.98687				16.45	1.0165
16.55	0.98209				16.55	1.02068
16.65	0.99742				16.65	0.99347
16.75	1.05991				16.75	0.99912
16.85	1.0552				16.85	0.99746
16.95	1.01471				16.95	0.99135
17.05	1.00571				17.05	1.00753
17.15	1.02144				17.15	0.98601
17.25	1.02272				17.25	1.02609
17.35	0.96754				17.35	0.99896
17.45	1.00398				17.45	0.9974
17.55	1.00161				17.55	0.99505
17.65	0.93314				17.65	1.00835
17.75	1.02949				17.75	1.01038
17.85	1.01537				17.85	1.01439
17.95	0.93415				17.95	0.99023
18.05	0.98189				18.05	1.02542
18.15	1.03021				18.15	1.00215
18.25	0.95631				18.25	0.99224
18.35	0.98392				18.35	0.99962
18.45	1.00515				18.45	0.99355
18.55	1.02021				18.55	1.00869
18.65	0.99171				18.65	1.00835
18.75	1.00885				18.75	0.99418
18.85	0.98643				18.85	1.01597
18.95	0.96985				18.95	1.00037
19.05	0.97426				19.05	1.01478
19.15	1.0028				19.15	1.01404
19.25	1.01718				19.25	0.99637
19.35	1.02155				19.35	0.99881
19.45	1.03902				19.45	1.00633
19.55	1.00658				19.55	0.99236
19.65	1.01941				19.65	1.01367
19.75	1.03479				19.75	1.01267
19.85	0.99545				19.85	0.99385
19.95	0.99458				19.95	0.99529

[truncated: 20 more sheets: Fig.2(h), Fig.2(i), Fig.2(j), Fig.3(a), Fig.3(b), Fig.3(g), Fig.3(h), Fig.4(a), Fig.4(b), Fig.4(c), Fig.4(d), Fig.4(e), Fig.5(a), Fig.5(b), Fig.5(d), Fig.5(f), Fig.5(g), Fig.5(h), Fig.5(i), Fig.5(j)]
